# Supplementary material for: Gold(i)-catalyzed enantioselective synthesis of polycyclic indoline skeletons and enantiomerically enriched β-substituted tryptamine-allenes by kinetic resolution
Source: Royal Society of Chemistry journal article supplement (doi:10.1039/c9cc00412b), 2019-01-01
Supplement: c9cc00412b1.pdf [file c9cc00412b1.pdf]

## Supporting Information

# Gold(I)-Catalyzed Enantioselective Synthesis of Polycyclic Indoline Skeletons and Enantiomerically Enriched $\beta$ -Substituted Tryptamine-Allenenes by Kinetic Resolution

Yan-Yan Zhang,<sup>a</sup> Yin Wei,<sup>a</sup> Min Shi<sup>a,b\*</sup>

<sup>a</sup> State Key Laboratory of Organometallic Chemistry, Center for Excellence in Molecular Synthesis, Shanghai Institute of Organic Chemistry, University of Chinese Academy of Sciences, 345 Lingling Road, Shanghai 200032, China

<sup>b</sup> State Key Laboratory and Institute of Elemento-organic Chemistry, Nankai University, Tianjin 300071, P. R. China. *Mshi@mail.sioc.ac.cn*. Fax 86-21-64166128

## CONTENTS

|                                                                                                            |           |
|------------------------------------------------------------------------------------------------------------|-----------|
| 1. General remarks.....                                                                                    | S2        |
| 2. General procedure for synthesis of <b>1</b> .....                                                       | S3        |
| 3. Conditions screening for kinetic resolution of racemic indole-allenes <b>1</b> .....                    | S5        |
| 4. General procedure for the gold(I)-catalyzed kinetic resolution of racemic indole-allenes <b>1</b> ..... | S6        |
| 5. Proposed reaction mechanism.....                                                                        | S7-S8     |
| 6. Characterization and spectra charts for compounds <b>1</b> .....                                        | S9-S65    |
| 7. Characterization and spectra charts for compounds <b>2</b> .....                                        | S66-S126  |
| 8. Characterization and spectra charts for compounds <b>3</b> and <b>4</b> .....                           | S127-S131 |
| 9. Transformations and the characterization and spectra charts.....                                        | S132-S142 |
| 10. X-ray crystallographic information of products <b>2f</b> , <b>6</b> , <b>7</b> and <b>2r'</b> .....    | S143-S146 |
| 11. References.....                                                                                        | S147      |

**1. General remarks.** Organic solvents used were dried by standard methods when necessary. Commercially obtained reagents were used without further purification. Unless otherwise noted, all reaction mixtures were stirred with a magnetic stir bar in flame-dried glassware under argon atmosphere. All the temperatures were referred to the used oil baths. Extracts were dried over MgSO<sub>4</sub> or Na<sub>2</sub>SO<sub>4</sub> and solvents were removed in a rotary evaporator. TLC analysis of reaction mixtures was performed on Huanghai GF<sub>254</sub> silica gel coated plates. Flash column chromatography was performed using 300-400 mesh silica gel (Huanghai GF254) and 250-400 mesh silica gel (Silicycle UltraPure silica gels). MP was obtained with a Yanagimoto micro melting point apparatus and is uncorrected. Infra-red spectra were measured on a spectrometer. <sup>1</sup>H NMR spectra were recorded for solution in CDCl<sub>3</sub> with tetramethylsilane (TMS) as an internal standard. <sup>19</sup>F NMR spectra were recorded for a solution in CDCl<sub>3</sub> with CFC<sub>3</sub> as the external reference. *J*-values are in Hz. Mass and HRMS spectra were recorded by ESI method.

## 2. General procedure for synthesis of **1**.

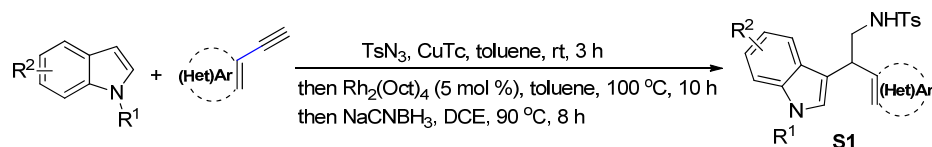

The compounds **S1** are prepared according to known procedures.<sup>[1]</sup>

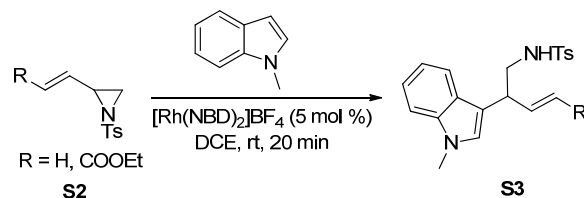

The compounds **S2** and **S3** are prepared according to known procedures.<sup>[2]</sup>

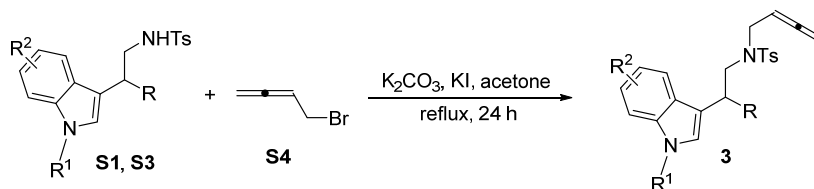

To an oven-dried reaction bottle was sequentially added **S1** or **S3** (4.00 mmol),  $\text{K}_2\text{CO}_3$  (8.00 mmol), KI (0.40 mmol) and **S4** (4.80 mmol) in acetone (20.00 mL). The resulting mixture was stirred under reflux. When the reaction was complete as monitored by TLC, it was cooled to room temperature. The solution was filtered through a short column of silica gel eluting with ethyl acetate, and then the solution was concentrated under reduced pressure and the crude residue was purified via a silica gel flash column chromatography (PE/EA = 15/1) to give the corresponding product **1**.

### 3. Conditions screening for kinetic resolution of racemic indole-allenes **1**.

**Table S1** Conditions screening for kinetic resolution of racemic indole-allenes **1**.<sup>a,b,c,d</sup>

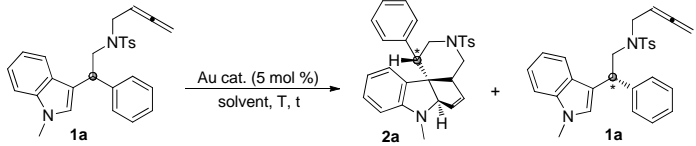

| entry <sup>a</sup> | Au cat.                                      | solvent                         | T (°C) | t/h | yield (%) <sup>b</sup> |           | ee (%) <sup>c</sup> |           | s-factor <sup>d</sup> |
|--------------------|----------------------------------------------|---------------------------------|--------|-----|------------------------|-----------|---------------------|-----------|-----------------------|
|                    |                                              |                                 |        |     | <b>2a</b>              | <b>1a</b> | <b>2a</b>           | <b>1a</b> |                       |
| 1                  | <b>L1</b> Au(MeCN)SbF <sub>6</sub>           | toluene                         | 0      | 48  | 0                      | >99       | -                   | -         | -                     |
| 2                  | <b>L2</b> (AuSbF <sub>6</sub> ) <sub>2</sub> | toluene                         | 0      | 48  | 0                      | >99       | -                   | -         | -                     |
| 3                  | <b>L3</b> AuSbF <sub>6</sub>                 | toluene                         | 0      | 48  | <5                     | 95        | -                   | -         | -                     |
| 4                  | <b>L4</b> (AuSbF <sub>6</sub> ) <sub>2</sub> | toluene                         | 0      | 48  | <5                     | 94        | -                   | -         | -                     |
| 5                  | <b>L5</b> (AuSbF <sub>6</sub> ) <sub>2</sub> | toluene                         | 0      | 48  | 31                     | <5        | 92                  | -         | -                     |
| 6                  | <b>L5</b> (AuNTf <sub>2</sub> ) <sub>2</sub> | toluene                         | 0      | 48  | 33                     | 40        | 91                  | 87        | 10.1                  |
| 7                  | <b>L5</b> (AuNTf <sub>2</sub> ) <sub>2</sub> | toluene                         | 10     | 48  | 30                     | 37        | 89                  | 82        | 8.9                   |
| 8                  | <b>L5</b> (AuNTf <sub>2</sub> ) <sub>2</sub> | toluene                         | -10    | 48  | 30                     | 45        | 91                  | 65        | 6.2                   |
| 9 <sup>e</sup>     | <b>L5</b> (AuNTf <sub>2</sub> ) <sub>2</sub> | toluene                         | 0      | 30  | 45                     | 45        | 93                  | 96        | 32.0                  |
| 10 <sup>f</sup>    | <b>L5</b> (AuNTf <sub>2</sub> ) <sub>2</sub> | toluene                         | 0      | 30  | 49                     | 45        | 91                  | 97        | 35.7                  |
| 11                 | <b>L5</b> (AuNTf <sub>2</sub> ) <sub>2</sub> | CH <sub>2</sub> Cl <sub>2</sub> | 0      | 30  | 16                     | 65        | 93                  | 73        | 14.8                  |
| 12                 | <b>L6</b> (AuNTf <sub>2</sub> ) <sub>2</sub> | toluene                         | -10    | 30  | 31                     | 46        | 92                  | 74        | 9.5                   |

<sup>a</sup> The reaction conditions: 0.1 M in solvent. <sup>b</sup> The yield was determined by <sup>1</sup>H NMR spectroscopic data using 1,3,5-trimethoxybenzene as an internal standard. <sup>c</sup> Determined by HPLC on a chiral stationary phase. <sup>d</sup> Selectivity (s-factor) calculated as  $s = \ln[(1-C)(1-eeSM)] / \ln[(1-C)(1+eeSM)]$ . <sup>e</sup> 4Å MS (50 mg) was added. <sup>f</sup> 0.05 M.

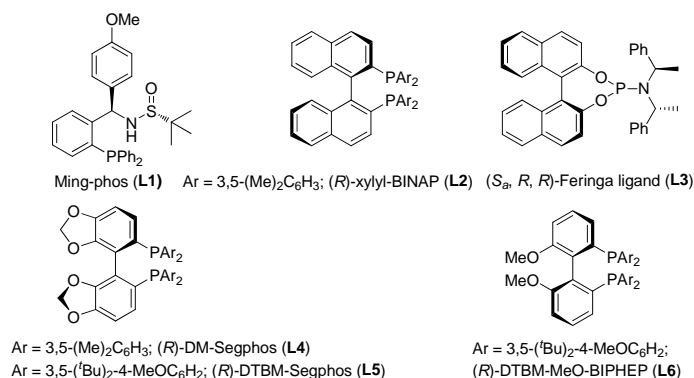

Our studies were initiated by examining the reactivity of racemic indole-allene **1a** in the presence of a series of gold complexes derived from chiral ligands **L1-L6** (Table S1). It was found that, chiral phosphine ligands **L1** and **L2** coordinated gold catalysts had no catalytic activities for the reaction (entries 1-2). When Feringa phosphoramidite-based ligand (**L3**) and biaryl bisphosphine ligand (*R*)-DM-Segphos (**L4**) incorporated gold catalyst were employed, only trace of cyclization product **2a** was detected by <sup>1</sup>H NMR analysis (entries 3-4). Further examination of chiral phosphine ligands revealed that sterically more demanding (*R*)-DTBM-Segphos (**L5**) furnished **2a** in 31% yield along with 92% ee value at 0 °C (entry 5). Next, we investigated the counterion effect by pre-preparing cationic gold catalysts and found



that NTf<sub>2</sub> was the better counterion, giving the cycloadduct **2a** in 33% yield along with 91% ee and enantiomerically enriched **1a** in 40% yield along with 87% ee (*s*-factor = 10.1) at 0 °C (entry 6). The reaction conditions with regard to temperature and concentration were then examined. We found that when 4Å molecular sieves (50 mg) was added into the reaction mixture or concentration of the reaction solution was decreased to 0.05 M in toluene, the *s*-factor could be dramatically improved to 32.0 or 35.7 at 0 °C (entries 7-10). Carrying out the reaction in DCM or using (*R*)-DTBM-MeO-BIPHEP(AuNTf<sub>2</sub>)<sub>2</sub> (**L6**) as the catalyst did not further enhance the kinetic resolution efficiency (entries 11-12). The optimal conditions shown in entry 10 of Table S1 could afford **2a** in 49% yield and 91% ee as well as **1a** in 45% yield and 97% ee along with a *s*-factor of 35.7. This synthetic strategy could provide a convenient and highly efficient method to prepare diversified enantiomerically enriched polycyclic indolines and β-substituted tryptamine-allene motifs.

#### 4. General procedure for the gold(I)-catalyzed kinetic resolution of racemic indole-allenes **1**.

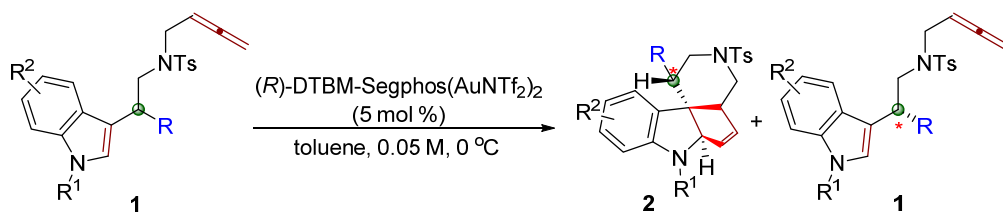

To a flame dried Schlenk tube was added unsymmetrical indole-allene **1** (0.1 mmol),  $(R)$ -DTBM-Segphos( $AuNTf_2$ )<sub>2</sub> (5.0 mol %) and the tube was evacuated and backfilled with argon for three times. Then, anhydrous toluene (2.0 mL) was added into tube under argon atmosphere. The reaction mixture was allowed to stir at 0 °C. The solvent was removed under reduced pressure, and the residue was purified by a flash column chromatography on silica gel to give the enantiomerically enriched compound **1** and desired product **2**.

## 5. Proposed reaction mechanism.

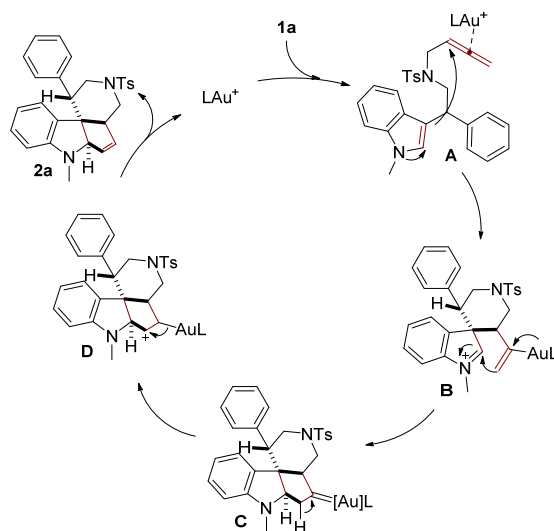

**Figure S1** Proposed reaction mechanism.

A plausible reaction mechanism for this gold(I)-catalyzed tandem intramolecular cyclization is outlined in Figure S1 on the basis of the the previous literature. Coordination of gold(I) complex with allene moiety in **1a** generates intermediate **A**, which then initiates a nucleophilic attack from C3 position of indole to allene moiety, resulting in the cyclized intermediate **B**. Intermediate **B** undergoes a further intramolecular cyclization to give a Au-carbenoid intermediate **C**, which follows a 1,2-hydrogen migration to afford intermediate **D**. The release of gold(I) catalyst produces the cycloaddition product **2a** and restarts the next catalytic cycle.

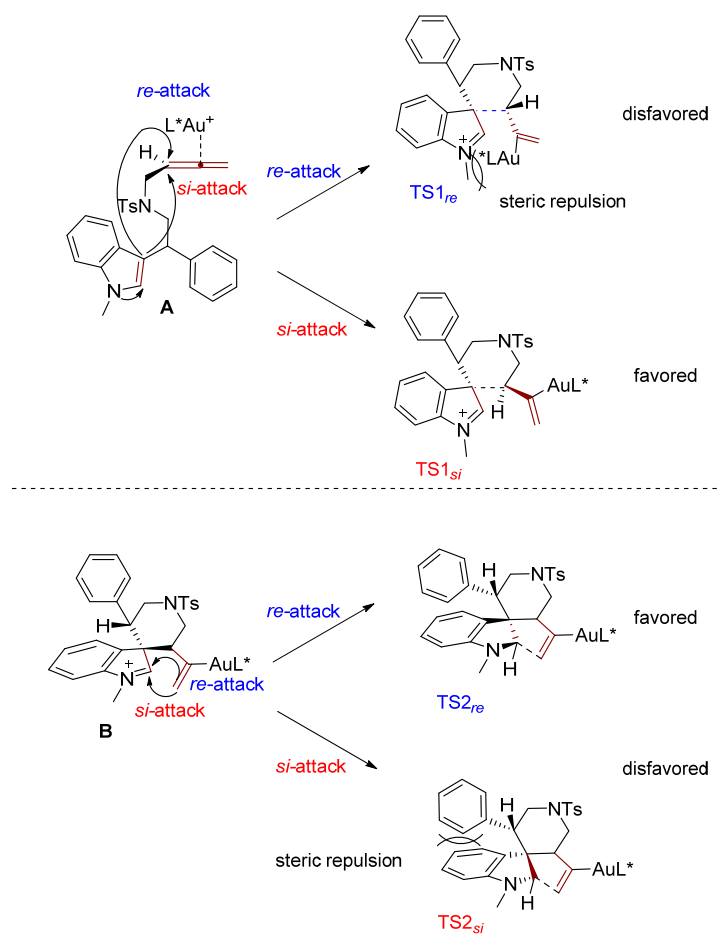

**Figure S2** Proposed key transition states for stereochemical control.

Proposed key transition states for the stereochemical control are illustrated in Figure S2. The intermediate **A** can undergo a nucleophilic attack from C3 position of indole to allene moiety via *re*-face or *si*-face to generate intermediate **B**. Probably due to the steric repulsion between the benzene ring moiety and chiral phosphine ligand ( $TS1_{re}$ ), the *si*-face attack is preferred in this step. Subsequently, the olefinic moiety of intermediate **B** attacks the C2 position of indole via *re*-face or *si*-face to form intermediate **C**. In this step, *re*-face attack is probably the dominated pathway since the *si*-face attack is disfavored due to the steric repulsion between the benzene ring and indole moiety ( $TS2_{si}$ ).

## 6. Characterization and spectra charts for compounds 1.

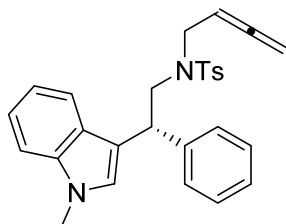

### **(R)-N-(buta-2,3-dien-1-yl)-4-methyl-N-(2-(1-methyl-1H-indol-3-yl)-2-phenylethyl)benzenesulfonamide 1a**

A white solid, 45% yield (20.5 mg). M.p.: 53-56 °C.  $^1\text{H}$  NMR ( $\text{CDCl}_3$ , TMS, 400 MHz)  $\delta$  2.38 (s, 3H), 3.53-3.61 (m, 1H), 3.62-3.69 (m, 1H), 3.73 (s, 3H), 3.82-3.90 (m, 1H), 3.99-4.06 (m, 1H), 4.60-4.71 (m, 4H), 7.00-7.06 (m, 2H), 7.16-7.22 (m, 4H), 7.25-7.34 (m, 5H), 7.47 (d,  $J = 8.0$  Hz, 1H), 7.60 (d,  $J = 8.0$  Hz, 2H).  $^{13}\text{C}$  NMR ( $\text{CDCl}_3$ , 100 MHz, TMS)  $\delta$  21.4, 32.7, 41.4, 46.2, 50.8, 76.1, 85.2, 109.1, 114.6, 118.8, 119.1, 121.5, 126.6, 126.9, 127.1, 127.2, 128.2, 128.4, 129.5, 136.9, 137.1, 142.0, 143.1, 209.2. IR ( $\text{CH}_2\text{Cl}_2$ )  $\nu$  2920, 1949, 1599, 1474, 1334, 1160, 1093, 1010, 903, 858, 750, 659  $\text{cm}^{-1}$ . MS (ESI)  $m/z$  (%): 457.19 (100)  $[\text{M}+\text{H}]^+$ ; HRMS (DART) Calcd. For  $\text{C}_{28}\text{H}_{29}\text{N}_2\text{O}_2\text{S}^+1$   $[\text{M}+\text{H}]^+$  requires 457.1944, found: 457.1941. Enantiomeric excess was determined by HPLC with a Chiralcel IC column [ $\lambda = 254$  nm; eluent: Hexane/Isopropanol = 86/14; Flow rate: 0.70 mL/min;  $t_{\text{minor}} = 23.35$  min,  $t_{\text{major}} = 26.05$  min;  $ee\% = 97\%$ ;  $[\alpha]_{\text{D}}^{25} = -23.0$  (c 0.70,  $\text{CH}_2\text{Cl}_2$ )].

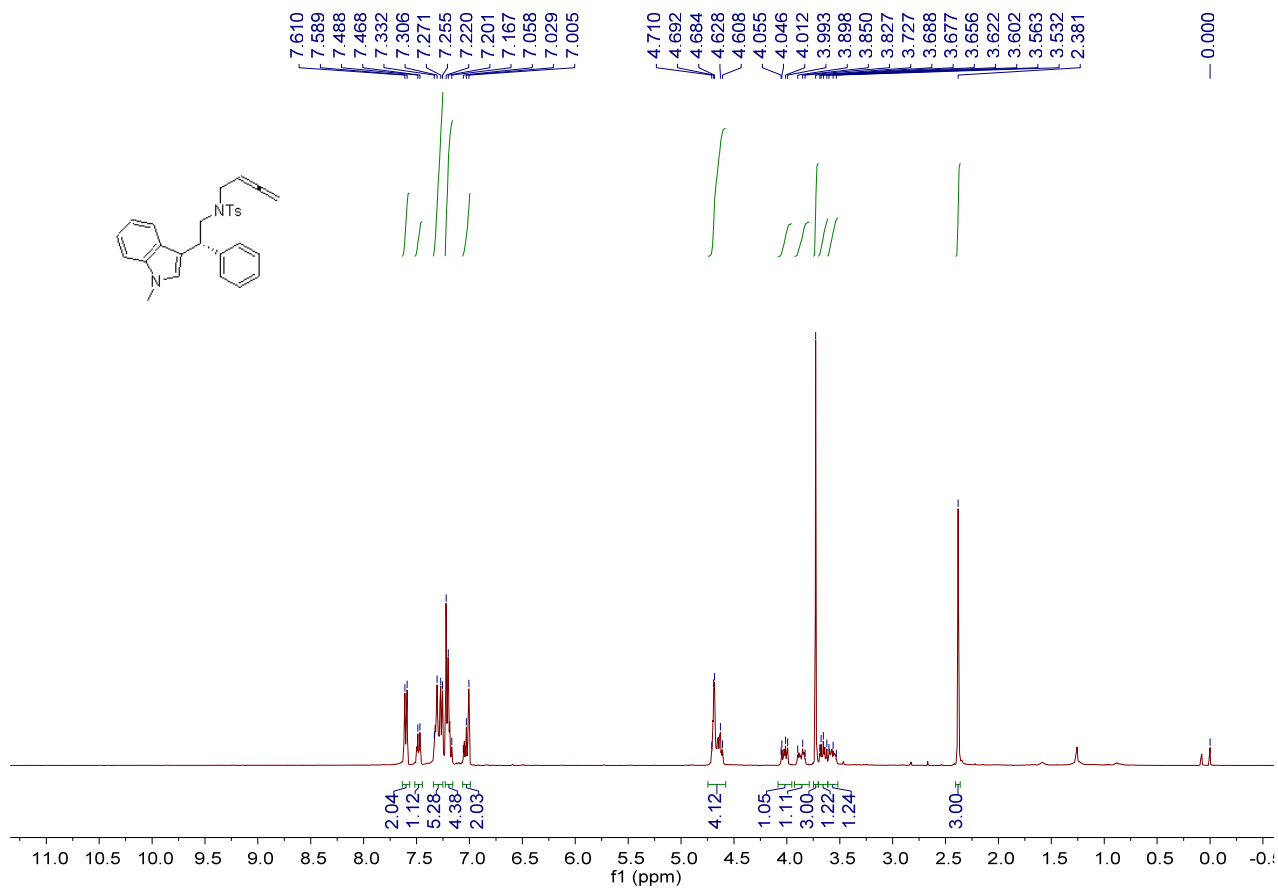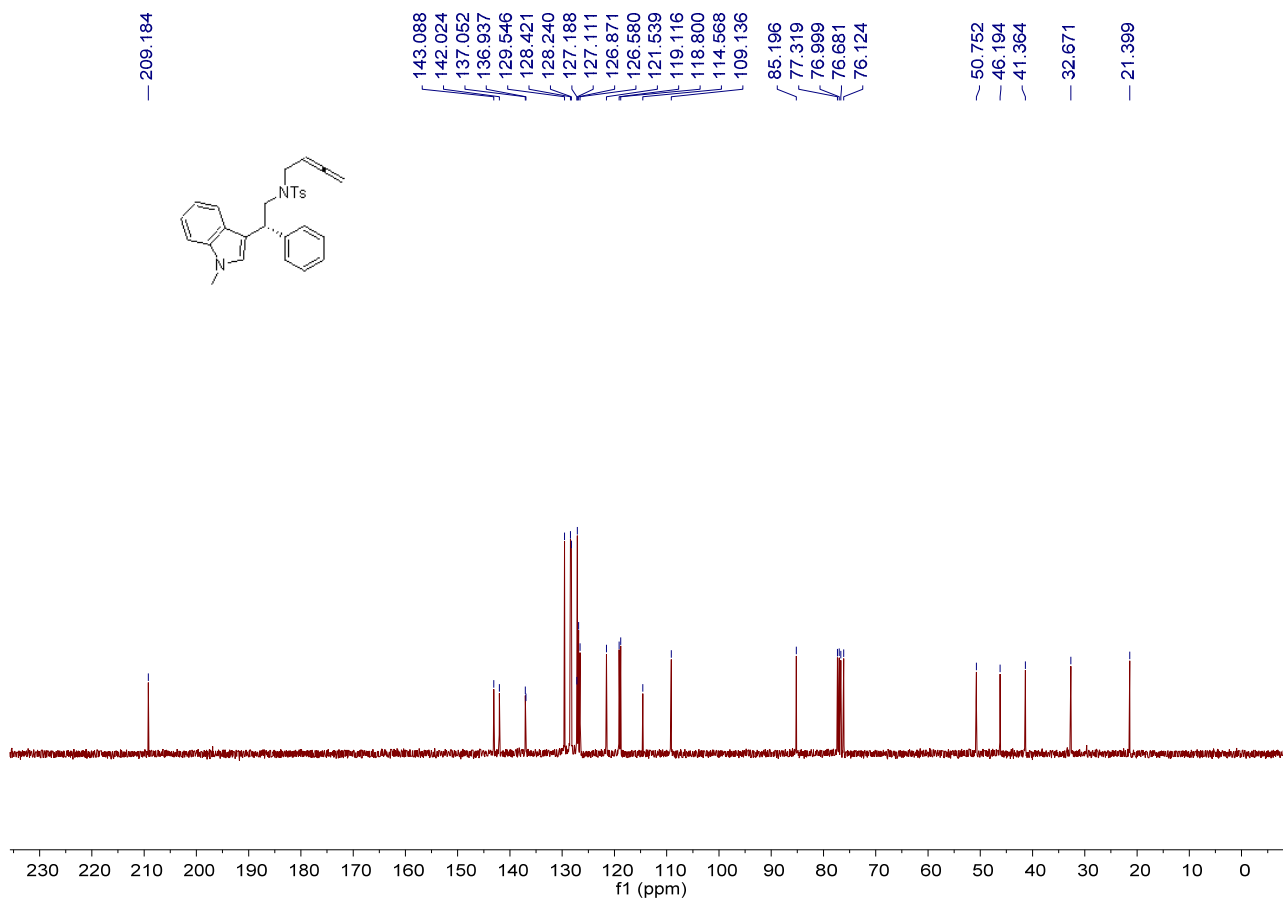

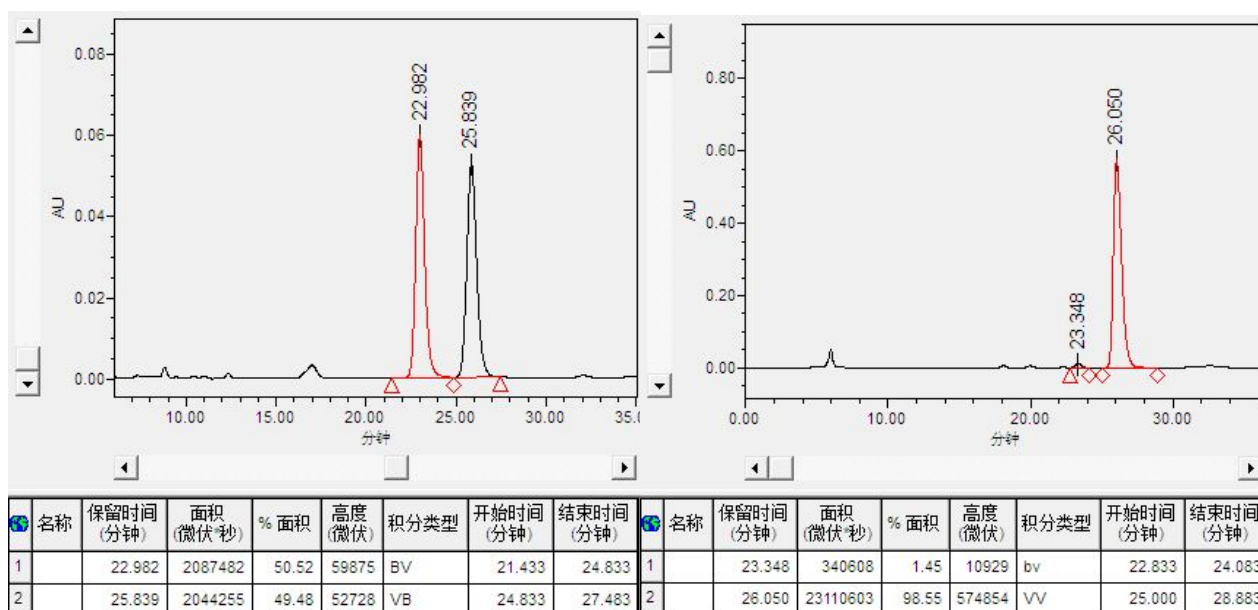

Translation: Chiralcel IC column [ $\lambda = 254$  nm; eluent: Hexane/Isopropanol = 86/14; Flow rate: 0.70 mL/min;  $t_{\text{minor}} = 23.35$  min,  $t_{\text{major}} = 26.05$  min; ee% = 97%].

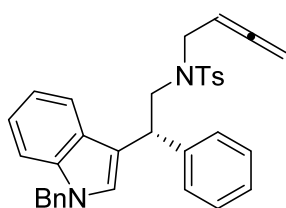

**(R)-N-(2-(1-benzyl-1H-indol-3-yl)-2-phenylethyl)-N-(buta-2,3-dien-1-yl)-4-methylbenzenesulfonamide 1b**

A white solid, 48% yield (25.5 mg). M.p.: 65-68 °C.  $^1\text{H}$  NMR ( $\text{CDCl}_3$ , TMS, 400 MHz)  $\delta$  2.38 (s, 3H), 3.51-3.58 (m, 1H), 3.66 (dd,  $J = 14.0, 8.0$  Hz, 1H), 3.79-3.87 (m, 1H), 4.03 (dd,  $J = 14.0, 8.0$  Hz, 1H), 4.62-4.68 (m, 4H), 5.28 (s, 2H), 7.00-7.05 (m, 1H), 7.09-7.15 (m, 4H), 7.19-7.33 (m, 11H), 7.48 (d,  $J = 8.0$  Hz, 1H), 7.60 (d,  $J = 8.0$  Hz, 2H).  $^{13}\text{C}$  NMR ( $\text{CDCl}_3$ , 100 MHz, TMS)  $\delta$  21.4, 41.6, 46.3, 50.0, 50.9, 76.1, 85.3, 109.7, 115.2, 119.1, 119.3, 121.8, 126.4, 126.5, 126.6, 127.1, 127.4, 127.6, 128.3, 128.4, 128.6, 129.5, 136.6, 137.1, 137.5, 142.0, 143.1, 209.2. IR ( $\text{CH}_2\text{Cl}_2$ )  $\nu$  3028, 2918, 2850, 1952, 1598, 1466, 1331, 1155, 1092, 936, 897, 846, 738, 657  $\text{cm}^{-1}$ . MS (ESI)  $m/z$  (%): 533.22 (100)  $[\text{M}+\text{H}]^+$ ; HRMS (DART) Calcd. For  $\text{C}_{34}\text{H}_{33}\text{N}_2\text{O}_2\text{S}^+$   $[\text{M}+\text{H}]^+$  requires 533.2257, found: 533.2253. Enantiomeric excess was determined by HPLC with a Chiralcel IC column [ $\lambda = 254$  nm; eluent: Hexane/Isopropanol = 86/14; Flow rate: 0.70 mL/min;  $t_{\text{minor}} = 21.38$  min,  $t_{\text{major}} = 22.70$  min; ee% = 84%;  $[\alpha]_{\text{D}}^{25} = -68.5$  (c 0.16,  $\text{CH}_2\text{Cl}_2$ )].

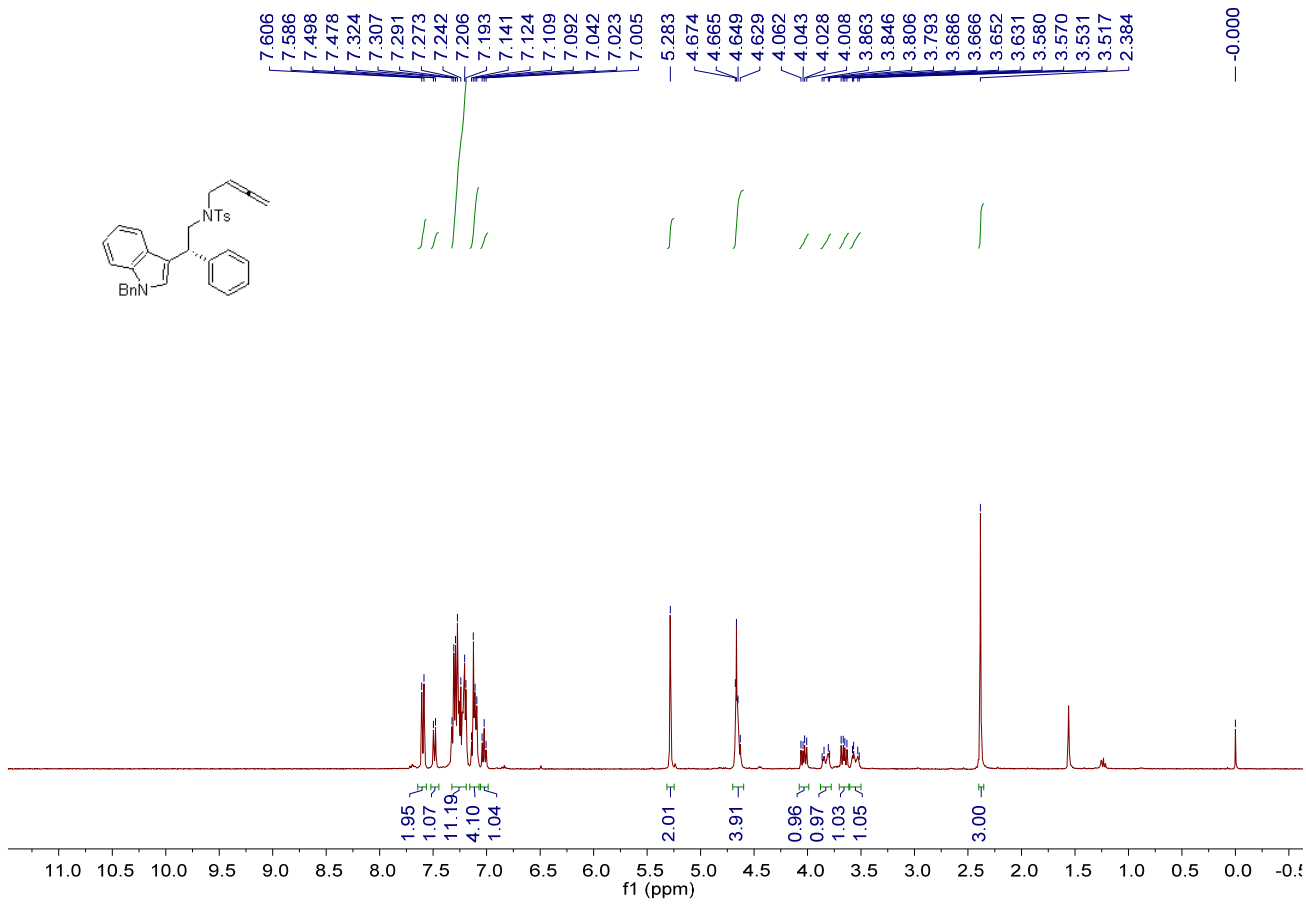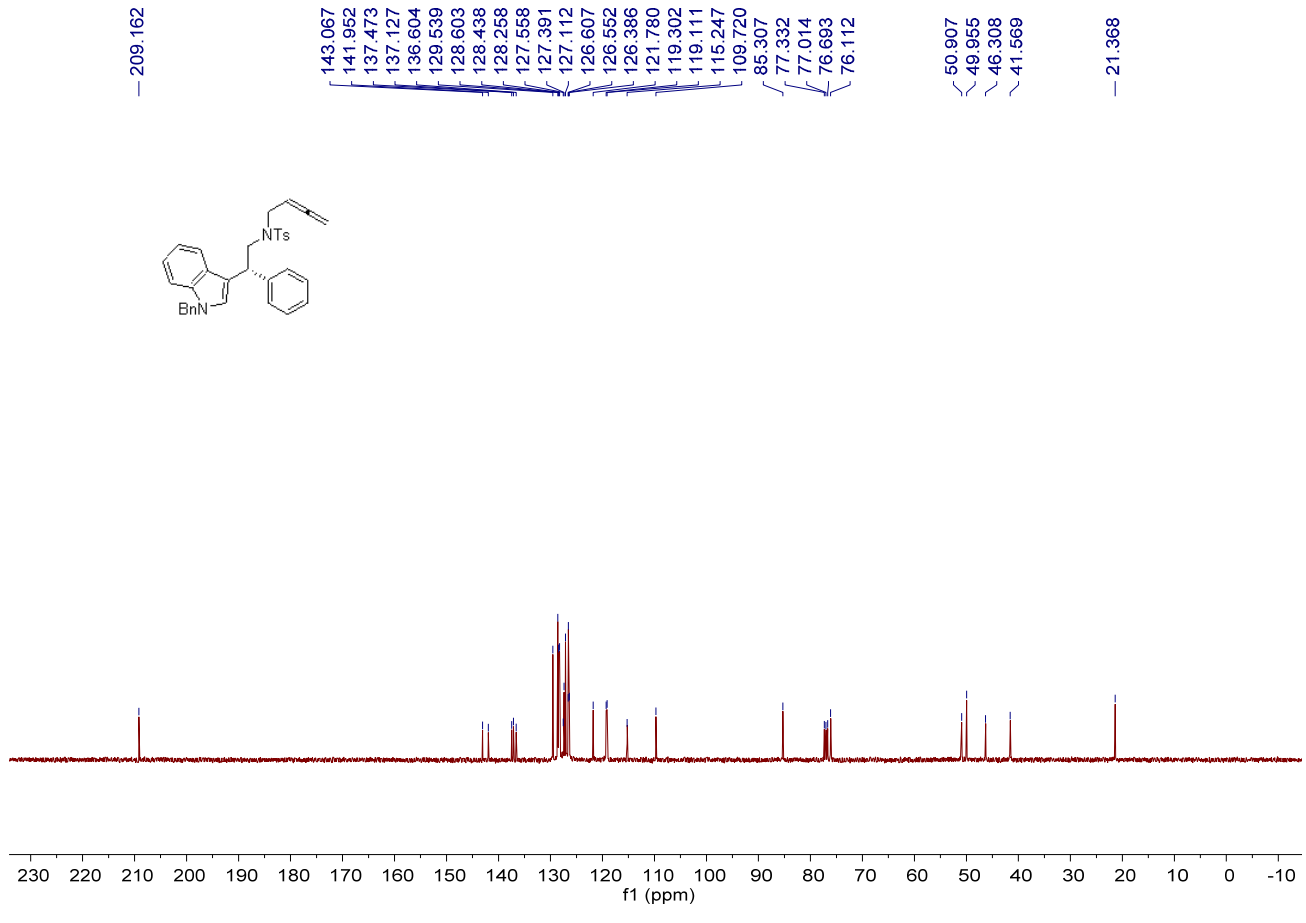



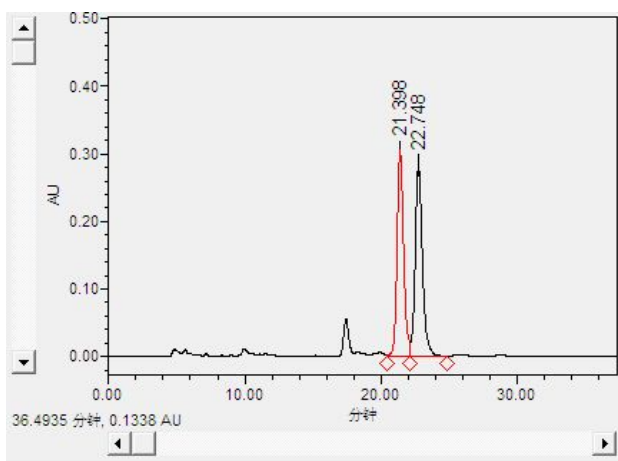

| 名称 | 保留时间 (分钟) | 面积 (微伏秒) | % 面积  | 高度 (微伏) | 积分类型 | 开始时间 (分钟) | 结束时间 (分钟) |
|----|-----------|----------|-------|---------|------|-----------|-----------|
| 1  | 21.398    | 10305756 | 49.27 | 304499  | VV   | 20.433    | 22.150    |
| 2  | 22.748    | 10610250 | 50.73 | 284558  | VV   | 22.150    | 24.850    |

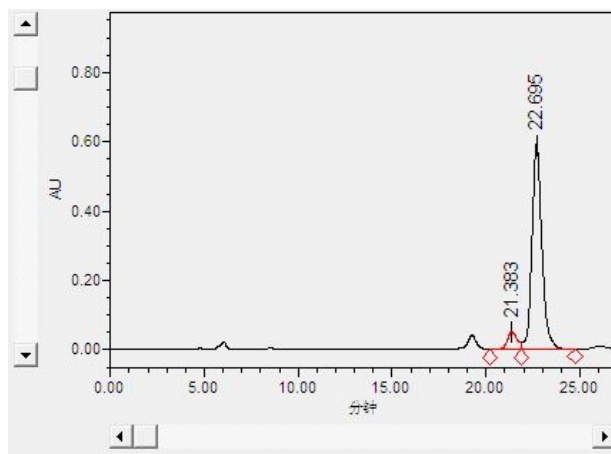

| 名称 | 保留时间 (分钟) | 面积 (微伏秒) | % 面积  | 高度 (微伏) | 积分类型 | 开始时间 (分钟) | 结束时间 (分钟) |
|----|-----------|----------|-------|---------|------|-----------|-----------|
| 1  | 21.363    | 1958847  | 8.12  | 52358   | VV   | 20.217    | 21.867    |
| 2  | 22.695    | 22169691 | 91.88 | 591854  | VV   | 21.867    | 24.750    |

Translation: Chiralcel IC column [ $\lambda = 254$  nm; eluent: Hexane/Isopropanol = 86/14; Flow rate: 0.70 mL/min;  $t_{\text{minor}} = 21.38$  min,  $t_{\text{major}} = 22.70$  min; ee% = 84%].

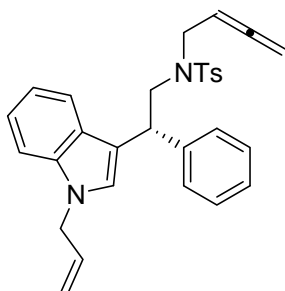

**(R)-N-(2-(1-allyl-1H-indol-3-yl)-2-phenylethyl)-N-(buta-2,3-dien-1-yl)-4-methylbenzenesulfonamide 1c**

A white solid, 46% yield (22.2 mg). M.p.: 60-63 °C.  $^1\text{H}$  NMR ( $\text{CDCl}_3$ , TMS, 400 MHz)  $\delta$  2.39 (s, 3H), 3.52-3.59 (m, 1H), 3.63-3.69 (m, 1H), 3.80-3.88 (m, 1H), 3.99-4.05 (m, 1H), 4.61-4.70 (m, 6H), 5.08 (d,  $J = 17.2$  Hz, 1H), 5.19 (d,  $J = 10.4$  Hz, 1H), 5.93-6.03 (m, 1H), 7.01-7.06 (m, 2H), 7.14-7.19 (m, 1H), 7.21-7.33 (m, 8H), 7.48 (d,  $J = 8.0$  Hz, 1H), 7.60 (d,  $J = 8.0$  Hz, 2H).  $^{13}\text{C}$  NMR ( $\text{CDCl}_3$ , 100 MHz, TMS)  $\delta$  21.4, 41.5, 46.3, 48.8, 50.8, 76.1, 85.3, 109.6, 115.0, 117.1, 119.0, 119.3, 121.6, 125.9, 126.6, 127.2, 127.5, 128.3, 128.5, 129.6, 133.4, 136.4, 137.1, 142.0, 143.1, 209.2. IR ( $\text{CH}_2\text{Cl}_2$ )  $\nu$  3064, 2902, 1960, 1595, 1462, 1330, 1154, 1089, 858, 741, 673  $\text{cm}^{-1}$ . MS (ESI)  $m/z$  (%): 483.21 (100)  $[\text{M}+\text{H}]^+$ ; HRMS (DART) Calcd. For  $\text{C}_{30}\text{H}_{31}\text{N}_2\text{O}_2\text{S}^+$   $[\text{M}+\text{H}]^+$  requires 483.2101, found: 483.2102. Enantiomeric excess was determined by HPLC with a Chiralcel IC column [ $\lambda = 214$  nm; eluent: Hexane/Isopropanol = 70/30; Flow rate: 0.70 mL/min;  $t_{\text{minor}} = 12.78$  min,  $t_{\text{major}} = 13.73$  min; ee% =

97%;  $[\alpha]_D^{25} = -78.0$  (c 0.10,  $\text{CH}_2\text{Cl}_2$ ).

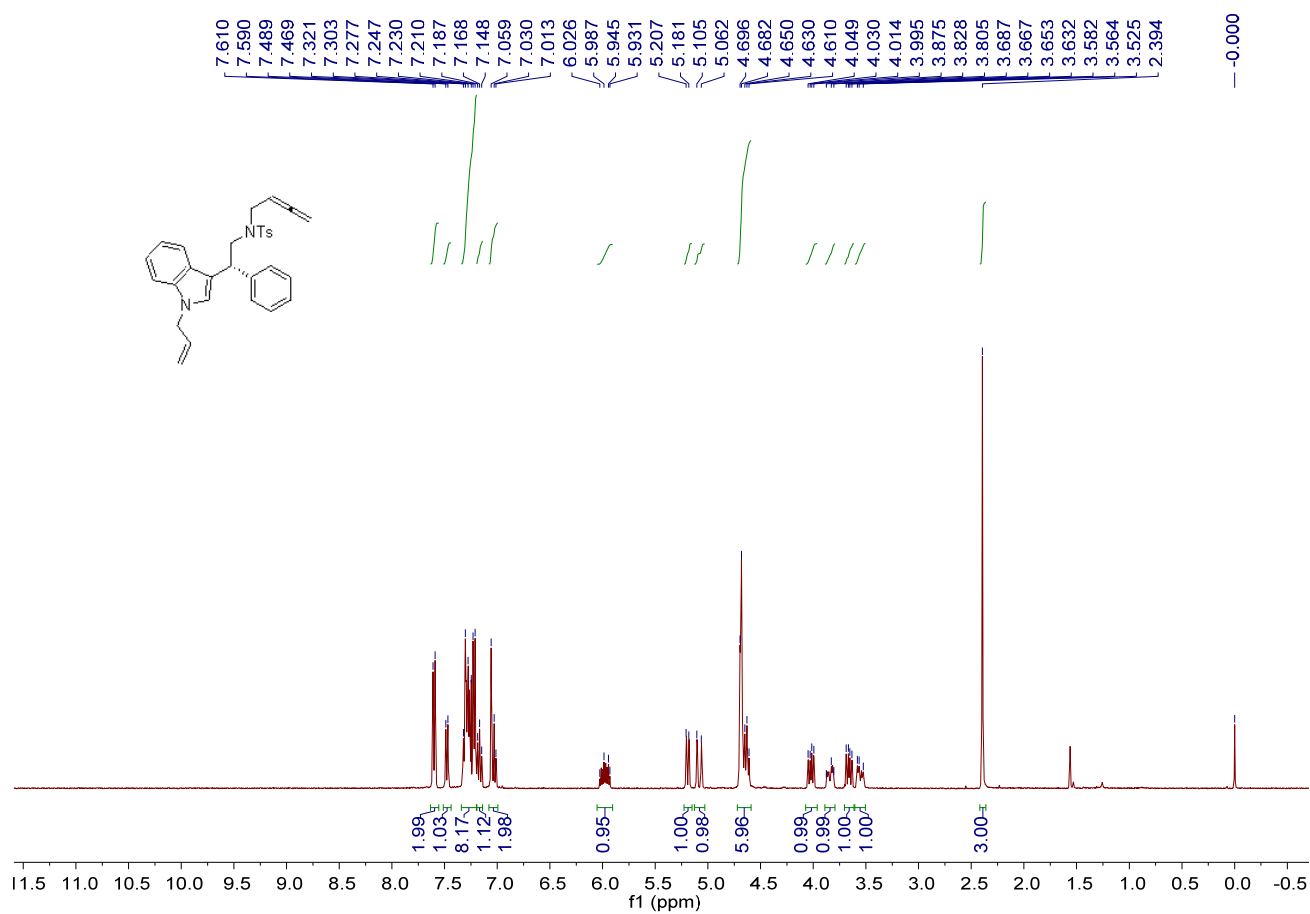

— 209.208

143.106  
141.987  
137.132  
136.411  
133.418  
129.579  
128.452  
128.292  
127.469  
127.159  
126.613  
125.921  
121.616  
119.285  
119.005  
117.140  
115.016  
109.577  
85.278  
77.316  
77.005  
76.676  
76.142

50.806  
48.762  
46.260  
41.489

— 21.439

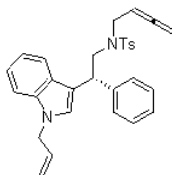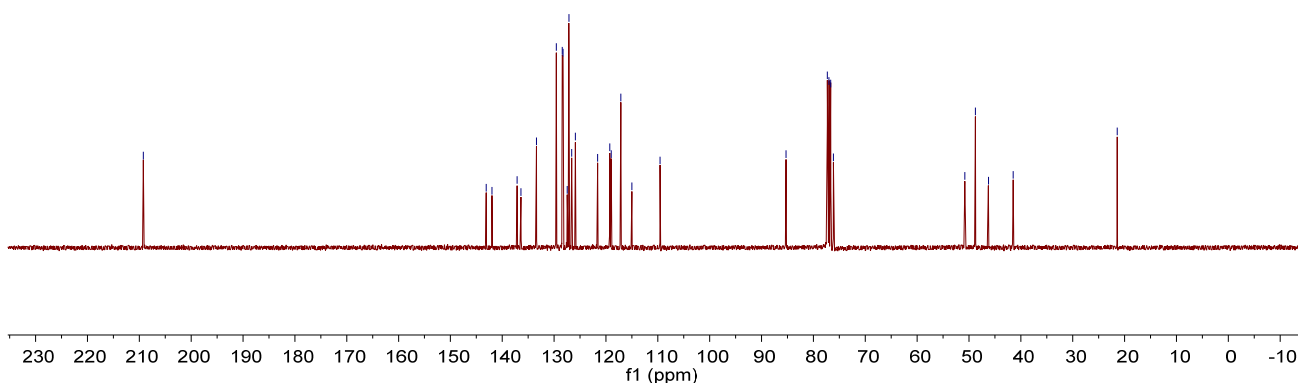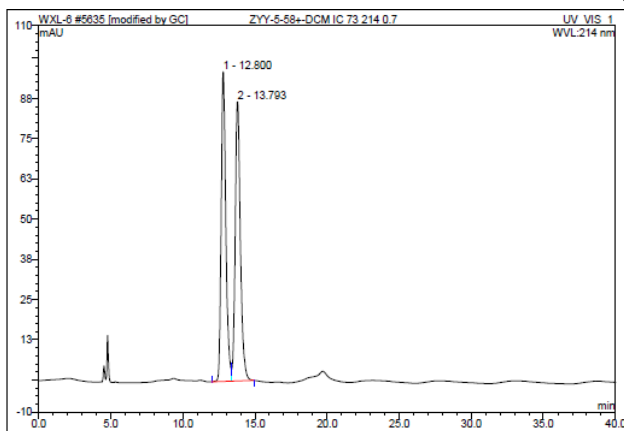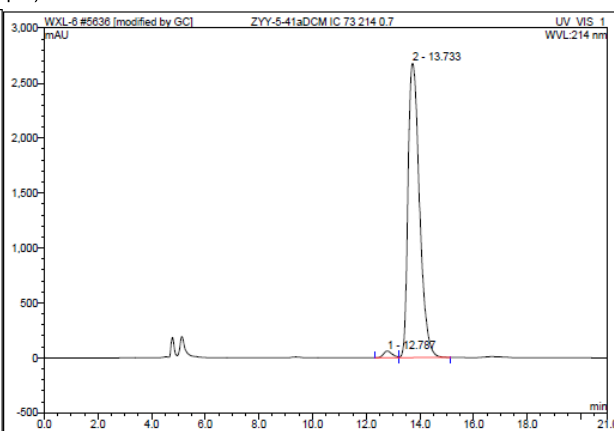

| No.    | Ret.Time min | Peak Name | Height mAU | Area mAU*min | Rel.Area % | Amount | Type | No.    | Ret.Time min | Peak Name | Height mAU | Area mAU*min | Rel.Area % | Amount | Type |
|--------|--------------|-----------|------------|--------------|------------|--------|------|--------|--------------|-----------|------------|--------------|------------|--------|------|
| 1      | 12.80        | n.a.      | 96.210     | 35.874       | 49.76      | n.a.   | BM   | 1      | 12.79        | n.a.      | 60.580     | 22.632       | 1.68       | n.a.   | BM   |
| 2      | 13.79        | n.a.      | 86.748     | 36.225       | 50.24      | n.a.   | MB   | 2      | 13.73        | n.a.      | 2678.287   | 1324.251     | 98.32      | n.a.   | MB   |
| Total: |              |           | 182.958    | 72.099       | 100.00     | 0.000  |      | Total: |              |           | 2738.866   | 1346.883     | 100.00     | 0.000  |      |

Translation: Chiralcel IC column [ $\lambda = 214$  nm; eluent: Hexane/Isopropanol = 70/30; Flow rate: 0.70 mL/min;  $t_{\text{minor}} = 12.78$  min,  $t_{\text{major}} = 13.73$  min; ee% = 97%]. (Note: In the 5 minute position, there is the peak of dichloromethane, due to that the sample was dissolved in dichloromethane for measuring).

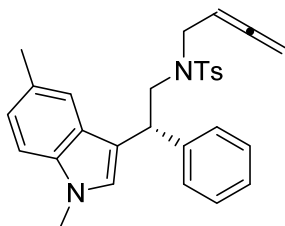

**(*R*)-*N*-(buta-2,3-dien-1-yl)-*N*-(2-(1,5-dimethyl-1*H*-indol-3-yl)-2-phenylethyl)-4-methylbenzenesulfonamide **1d****

A white solid, 48% yield (22.5 mg). M.p.: 83-86 °C. <sup>1</sup>H NMR (CDCl<sub>3</sub>, TMS, 400 MHz) δ 2.39 (s, 3H), 2.40 (s, 3H), 3.54-3.61 (m, 1H), 3.65 (dd, *J* = 13.6, 8.4 Hz, 1H), 3.70 (s, 3H), 3.81-3.89 (m, 1H), 3.97 (dd, *J* = 14.0, 7.6 Hz, 1H), 4.60 (t, *J* = 8.0 Hz, 1H), 4.64-4.72 (m, 3H), 6.94 (s, 1H), 7.01 (d, *J* = 8.0 Hz, 1H), 7.15 (d, *J* = 8.0 Hz, 1H), 7.20-7.24 (m, 3H), 7.26-7.34 (m, 5H), 7.60 (d, *J* = 8.0 Hz, 2H). <sup>13</sup>C NMR (CDCl<sub>3</sub>, 100 MHz, TMS) δ 21.47, 21.49, 32.8, 41.3, 46.2, 50.8, 76.1, 85.3, 108.9, 114.0, 118.8, 123.2, 126.6, 127.0, 127.2, 127.4, 128.0, 128.3, 128.5, 129.6, 135.4, 137.2, 142.1, 143.1, 209.3. IR (CH<sub>2</sub>Cl<sub>2</sub>) ν 2921, 2850, 1698, 1608, 1510, 1450, 1335, 1273, 1159, 1015, 941, 769, 656 cm<sup>-1</sup>. MS (ESI) *m/z* (%): 471.20 (100) [M+H]<sup>+</sup>; HRMS (ESI) Calcd. For C<sub>29</sub>H<sub>31</sub>N<sub>2</sub>O<sub>2</sub>S<sup>+</sup> [M+H]<sup>+</sup> requires 471.2101, found: 471.2097. Enantiomeric excess was determined by HPLC with a Chiralcel IC column [λ = 254 nm; eluent: Hexane/Isopropanol = 80/20; Flow rate: 0.50 mL/min; *t*<sub>minor</sub> = 24.61 min, *t*<sub>major</sub> = 27.33 min; ee% = 96%; [α]<sub>D</sub><sup>25</sup> = -25.0 (c 0.20, CH<sub>2</sub>Cl<sub>2</sub>)].

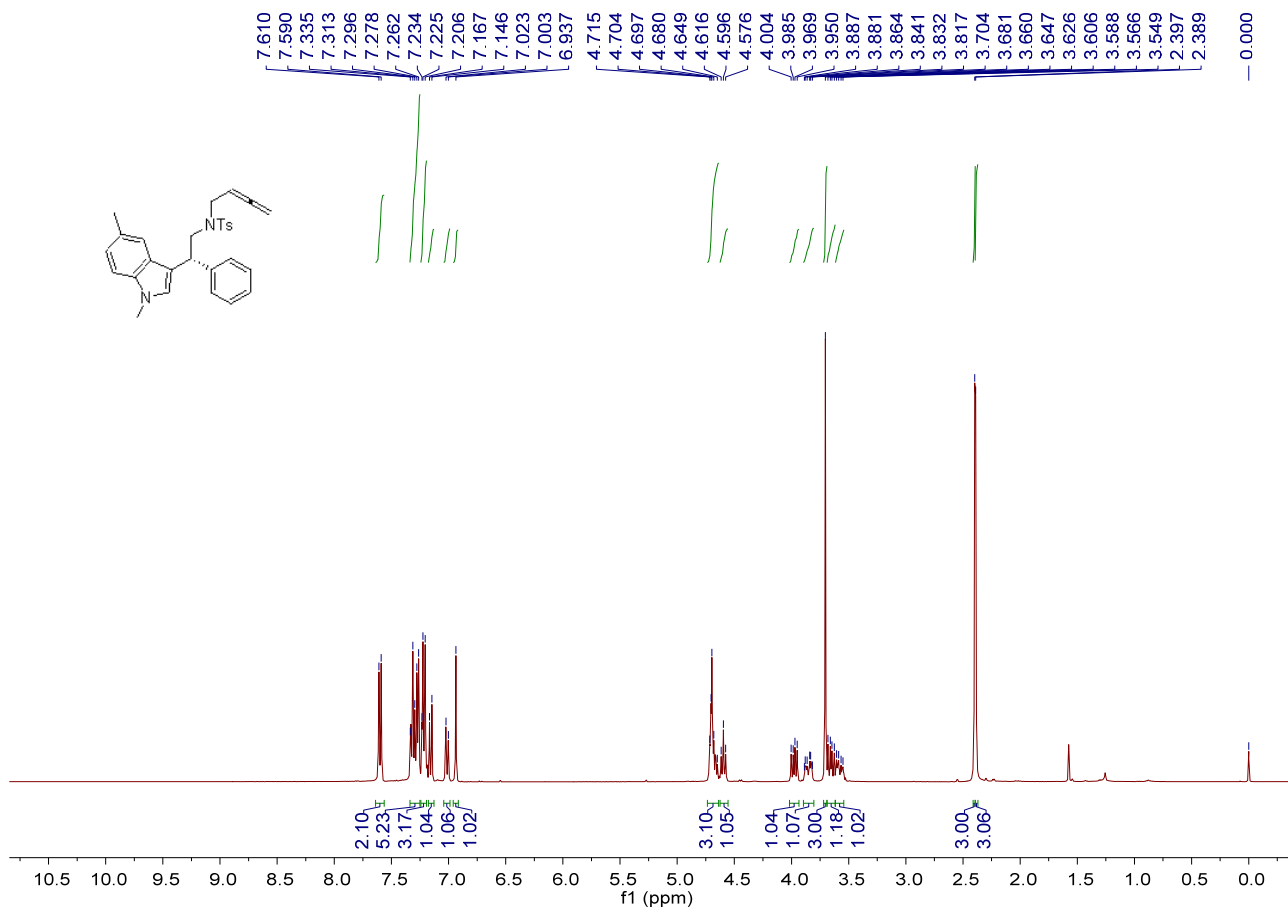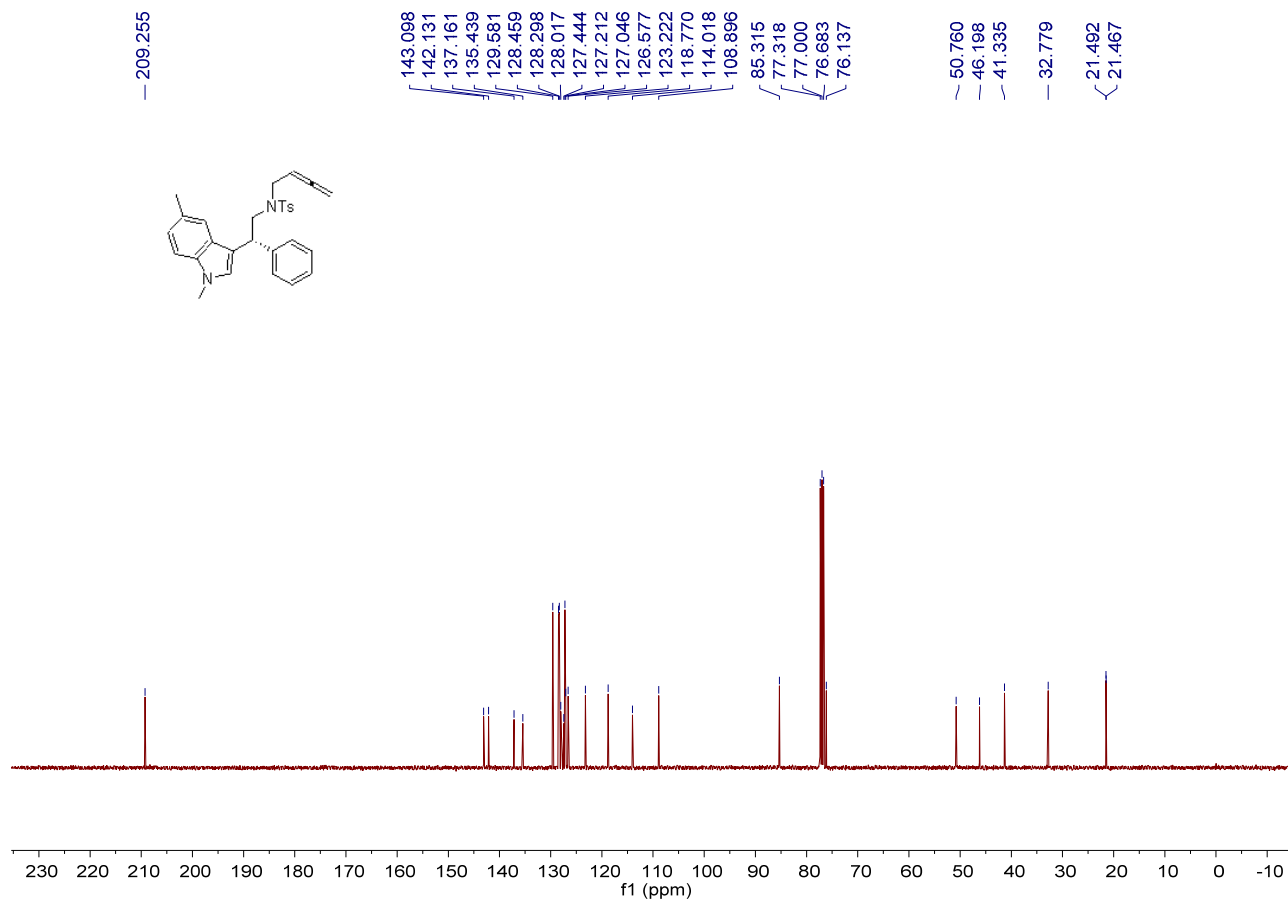

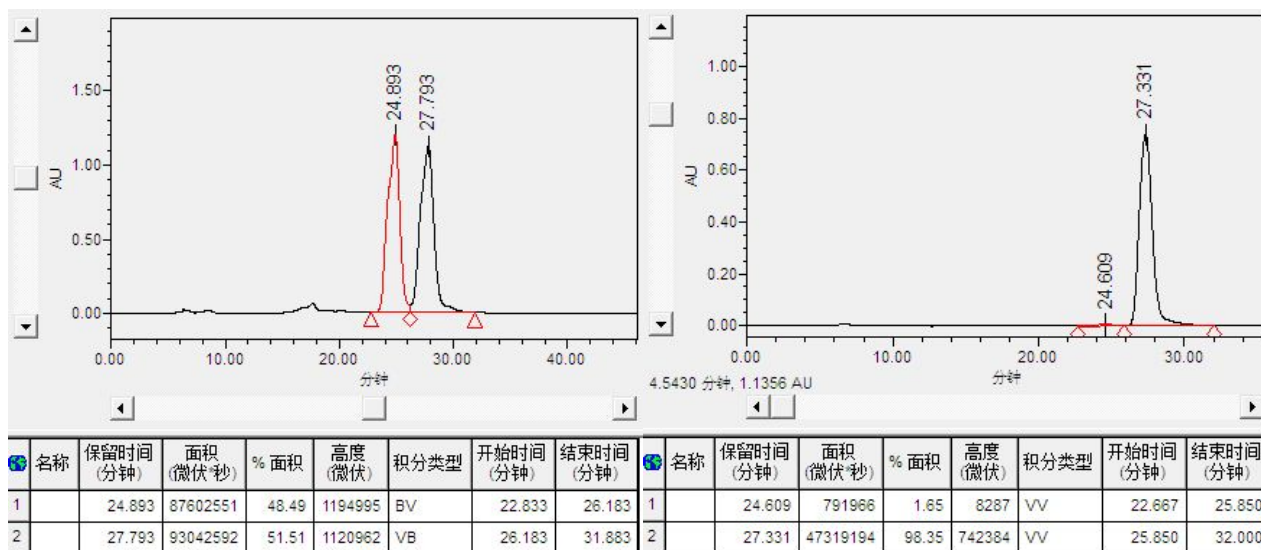

Translation: Chiralcel IC column [ $\lambda = 254$  nm; eluent: Hexane/Isopropanol = 80/20; Flow rate: 0.50 mL/min;  $t_{\text{minor}} = 24.61$  min,  $t_{\text{major}} = 27.33$  min; ee% = 96%].

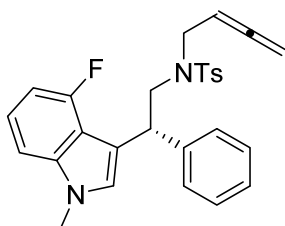

**(R)-N-(buta-2,3-dien-1-yl)-N-(2-(4-fluoro-1-methyl-1H-indol-3-yl)-2-phenylethyl)-4-methylbenzenesulfonamide 1e**

A white solid, 50% yield (23.8 mg). M.p.: 117-120 °C.  $^1\text{H}$  NMR ( $\text{CDCl}_3$ , TMS, 400 MHz)  $\delta$  2.39 (s, 3H), 3.60-3.72 (m, 2H), 3.74 (s, 3H), 3.85-3.93 (m, 1H), 4.00 (dd,  $J = 13.6, 8.8$  Hz, 1H), 4.68-4.73 (m, 3H), 4.82 (t,  $J = 8.0$  Hz, 1H), 6.62-6.68 (m, 1H), 7.01-7.10 (m, 3H), 7.18-7.31 (m, 7H), 7.59 (d,  $J = 8.0$  Hz, 2H).  $^{13}\text{C}$  NMR ( $\text{CDCl}_3$ , 100 MHz, TMS)  $\delta$  21.5, 33.2, 41.1, 46.0, 51.1, 76.1, 85.1, 104.2 (d,  $J = 19.7$  Hz), 105.3 (d,  $J = 3.5$  Hz), 113.1 (d,  $J = 3.6$  Hz), 115.9 (d,  $J = 19.5$  Hz), 121.9 (d,  $J = 8.0$  Hz), 126.5, 127.1, 127.3, 128.2, 128.4, 129.6, 137.0, 139.7 (d,  $J = 11.9$  Hz), 142.4, 143.1, 156.8 (d,  $J = 245.0$  Hz), 209.2.  $^{19}\text{F}$  NMR ( $\text{CDCl}_3$ , 376 MHz,  $\text{CFC}_3$ )  $\delta$  -121.7. IR ( $\text{CH}_2\text{Cl}_2$ )  $\nu$  2914, 2861, 1956, 1627, 1498, 1331, 1236, 1152, 1091, 984, 844, 771, 658  $\text{cm}^{-1}$ . MS (ESI)  $m/z$  (%): 475.18 (100)  $[\text{M}+\text{H}]^+$ ; HRMS (ESI) Calcd. For  $\text{C}_{28}\text{H}_{28}\text{N}_2\text{O}_2\text{FS}^+$   $[\text{M}+\text{H}]^+$  requires 475.1850, found: 475.1844. Enantiomeric excess was determined by HPLC with a Chiralcel IC column [ $\lambda = 254$  nm; eluent: Hexane/Isopropanol = 90/10; Flow rate: 0.70 mL/min;  $t_{\text{minor}} = 30.62$  min,  $t_{\text{major}} = 50.90$  min; ee% =

68%;  $[\alpha]_D^{25} = -47.1$  (c 0.08,  $\text{CH}_2\text{Cl}_2$ ).

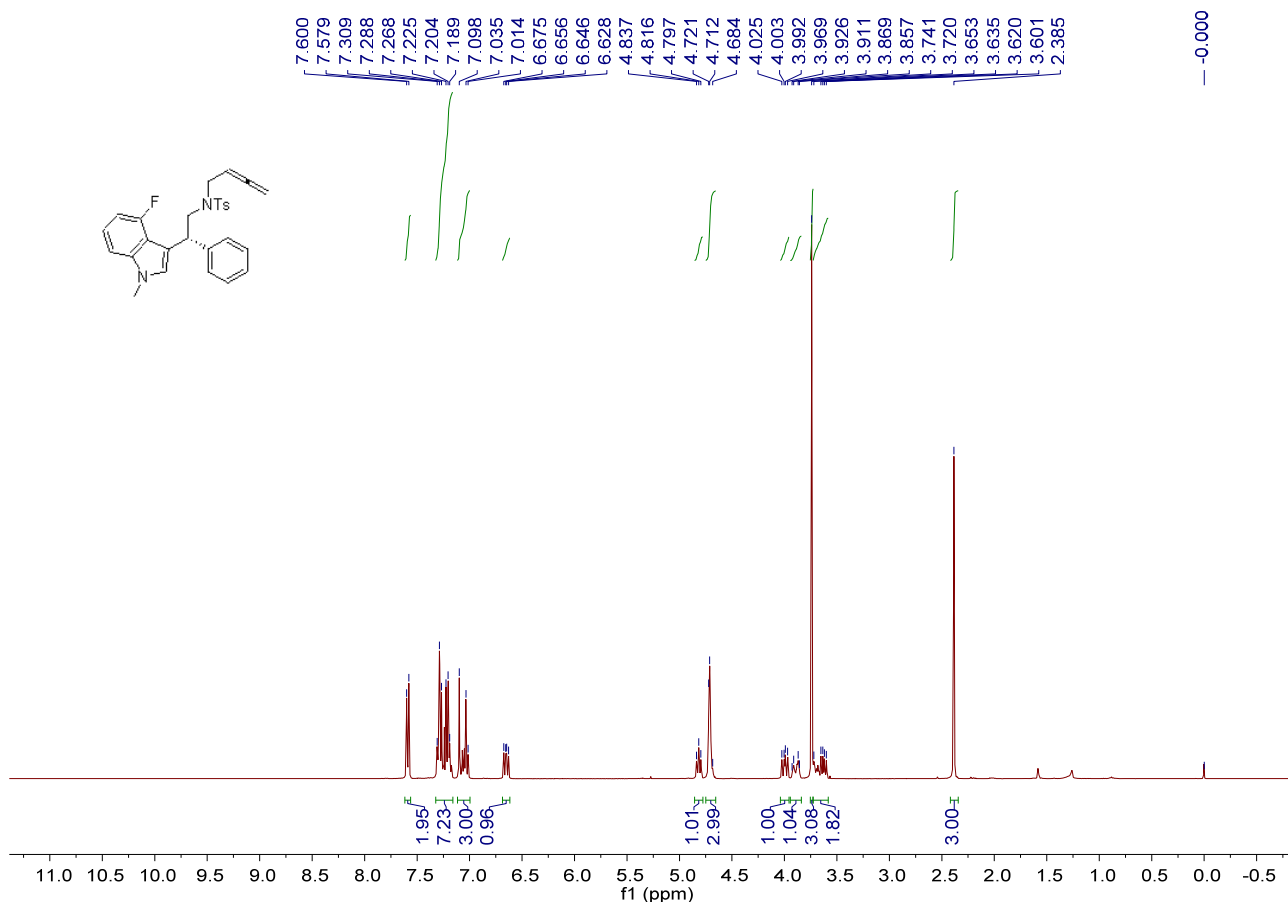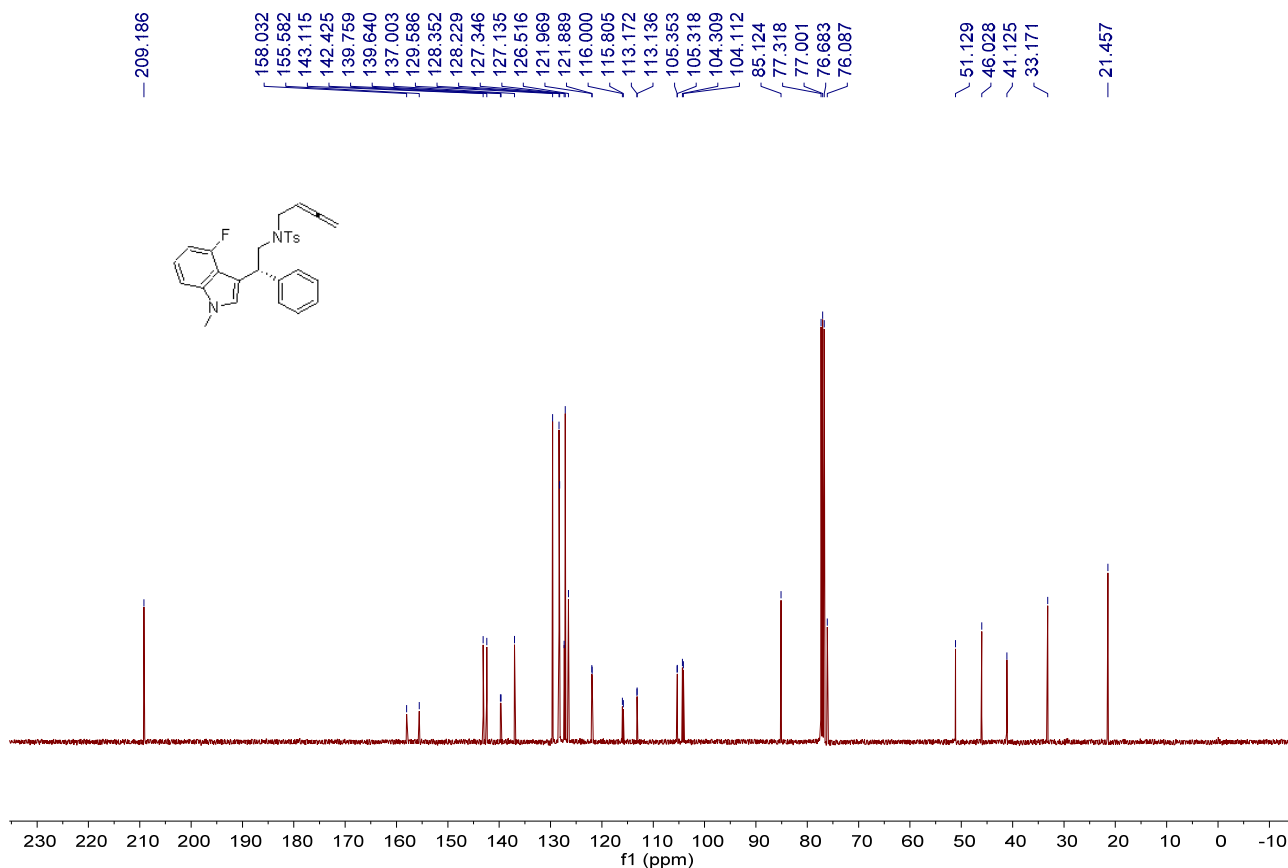

-121.691  
-121.704  
-121.719  
-121.731

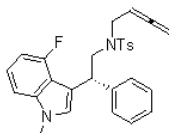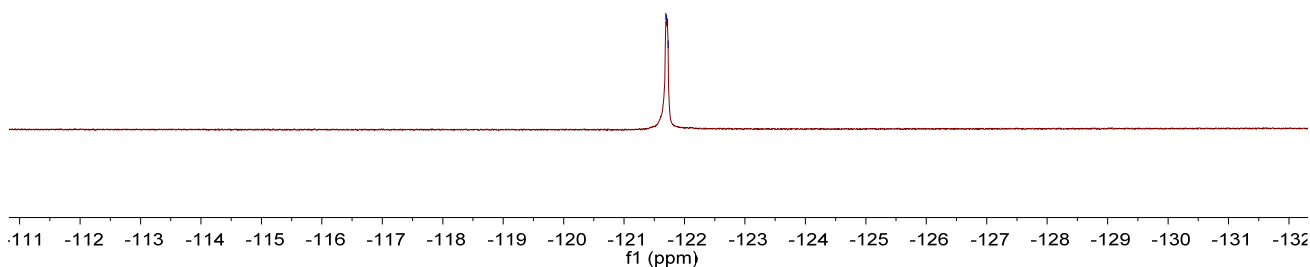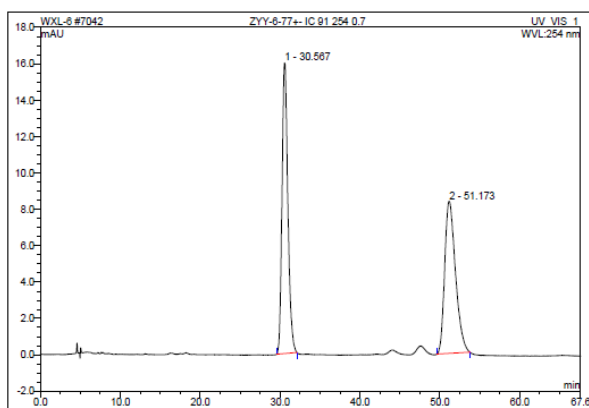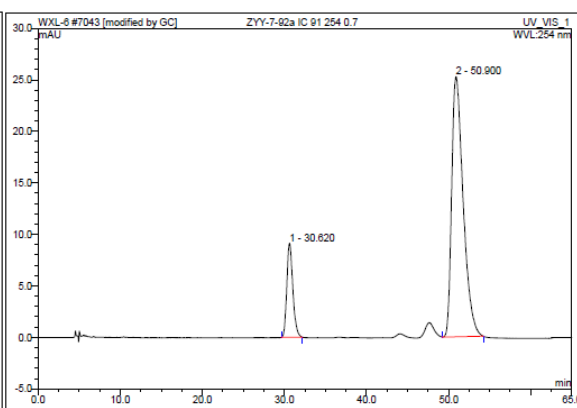

| No.           | Ret.Time min | Peak Name | Height mAU | Area mAU*min | Rel.Area % | Amount | Type |
|---------------|--------------|-----------|------------|--------------|------------|--------|------|
| 1             | 30.57        | n.a.      | 15.986     | 13.537       | 50.80      | n.a.   | BMB  |
| 2             | 51.17        | n.a.      | 8.367      | 13.109       | 49.20      | n.a.   | BMB  |
| <b>Total:</b> |              |           | 24.353     | 26.646       | 100.00     | 0.000  |      |

| No.           | Ret.Time min | Peak Name | Height mAU | Area mAU*min | Rel.Area % | Amount | Type |
|---------------|--------------|-----------|------------|--------------|------------|--------|------|
| 1             | 30.62        | n.a.      | 9.126      | 7.747        | 15.90      | n.a.   | BMB  |
| 2             | 50.90        | n.a.      | 25.254     | 40.984       | 84.10      | n.a.   | BMB* |
| <b>Total:</b> |              |           | 34.380     | 48.731       | 100.00     | 0.000  |      |

Translation: Chiralcel IC column [ $\lambda = 254$  nm; eluent: Hexane/Isopropanol = 90/10; Flow rate: 0.70 mL/min;  $t_{\text{minor}} = 30.62$  min,  $t_{\text{major}} = 50.90$  min; ee% = 68%].



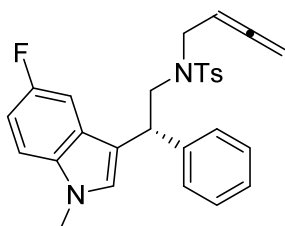

**(R)-N-(buta-2,3-dien-1-yl)-N-(2-(5-fluoro-1-methyl-1H-indol-3-yl)-2-phenylethyl)-4-methylbenzenesulfonamide **1f****

A white solid, 46% yield (21.8 mg). M.p.: 104-107 °C.  $^1\text{H}$  NMR ( $\text{CDCl}_3$ , TMS, 400 MHz)  $\delta$  2.36 (s, 3H), 3.54-3.65 (m, 2H), 3.69 (s, 3H), 3.82-3.88 (m, 1H), 4.00 (dd,  $J = 13.6, 8.0$  Hz, 1H), 4.54 (t,  $J = 8.0$  Hz, 1H), 4.63-4.72 (m, 3H), 6.87-6.93 (m, 1H), 7.06-7.16 (m, 3H), 7.19-7.31 (m, 7H), 7.59 (d,  $J = 8.0$  Hz, 2H).  $^{13}\text{C}$  NMR ( $\text{CDCl}_3$ , 100 MHz, TMS)  $\delta$  21.4, 32.9, 41.3, 46.2, 50.7, 76.2, 85.2, 103.9 (d,  $J = 23.9$  Hz), 109.7, 109.8, 109.9, 110.0, 114.4 (d,  $J = 4.8$  Hz), 126.7, 127.1, 127.4 (d,  $J = 9.7$  Hz), 128.1, 128.5, 129.6, 133.6, 137.0, 141.8, 143.2, 157.4 (d,  $J = 232.6$  Hz), 209.2.  $^{19}\text{F}$  NMR ( $\text{CDCl}_3$ , 376 MHz,  $\text{CFCl}_3$ )  $\delta$  -125.2. IR ( $\text{CH}_2\text{Cl}_2$ )  $\nu$  3034, 1954, 1597, 1489, 1339, 1157, 1098, 953, 848, 770, 661  $\text{cm}^{-1}$ . MS (ESI)  $m/z$  (%): 475.18 (100)  $[\text{M}+\text{H}]^+$ ; HRMS (DART) Calcd. For  $\text{C}_{28}\text{H}_{28}\text{N}_2\text{O}_2\text{FS}^+$   $[\text{M}+\text{H}]^+$  requires 475.1850, found: 475.1846. Enantiomeric excess was determined by HPLC with a Chiralcel IC column [ $\lambda = 214$  nm; eluent: Hexane/Isopropanol = 80/20; Flow rate: 0.70 mL/min;  $t_{\text{minor}} = 20.34$  min,  $t_{\text{major}} = 22.40$  min; ee% = 92%;  $[\alpha]_{\text{D}}^{25} = -162.5$  (c 0.08,  $\text{CH}_2\text{Cl}_2$ )].

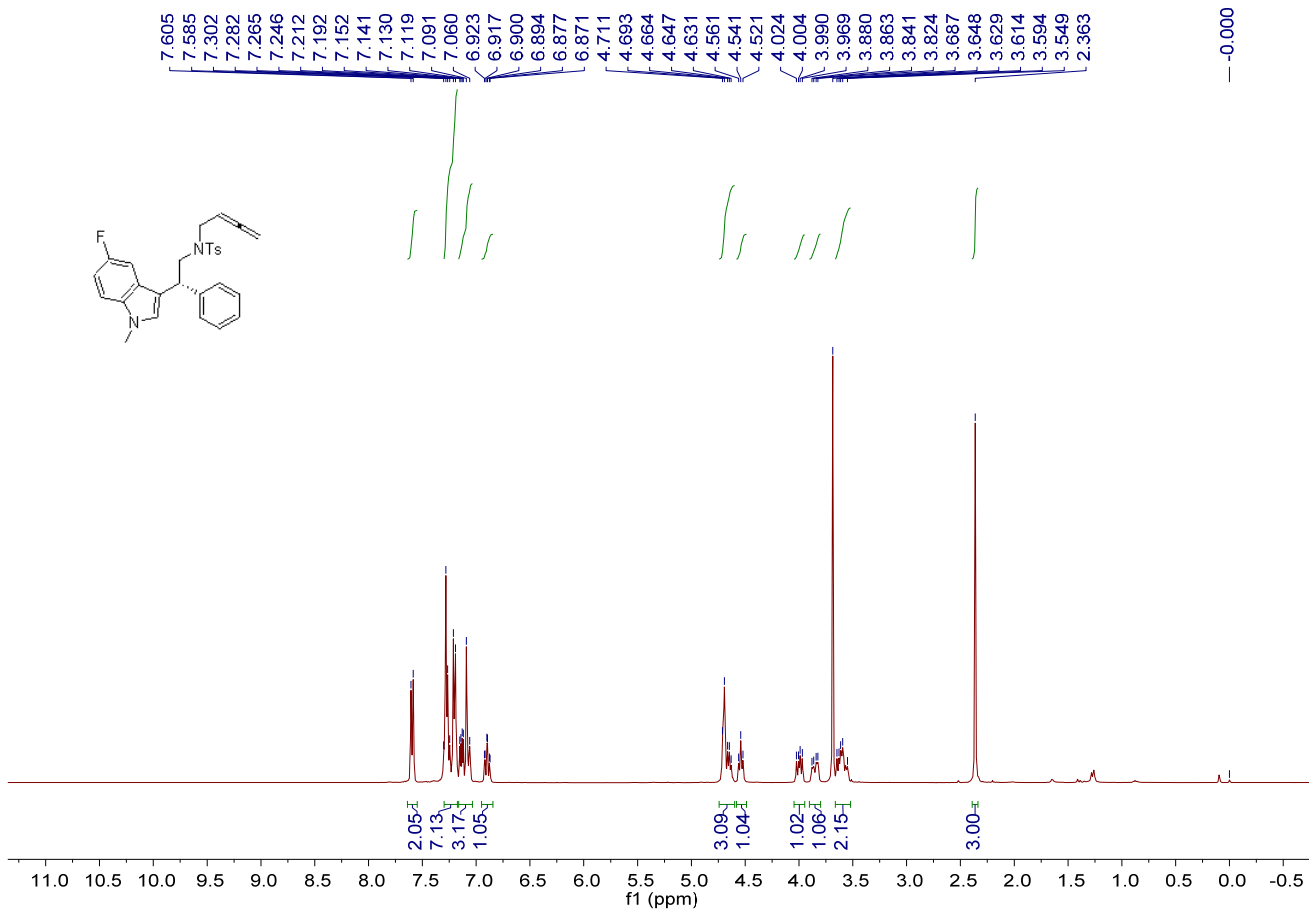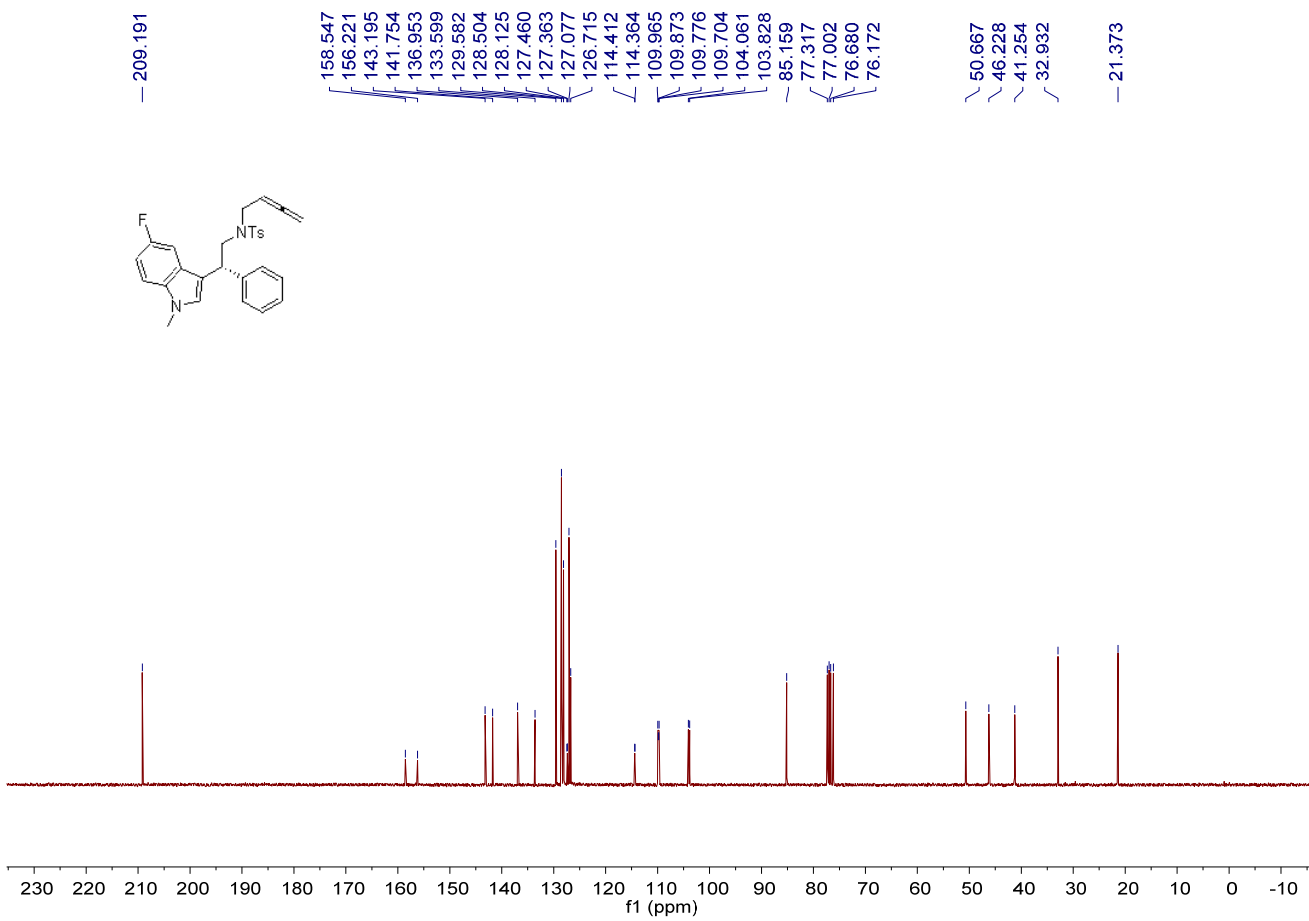

-125.147  
-125.156  
-125.167  
-125.172  
-125.181  
-125.192  
-125.207  
-125.217

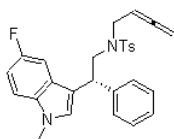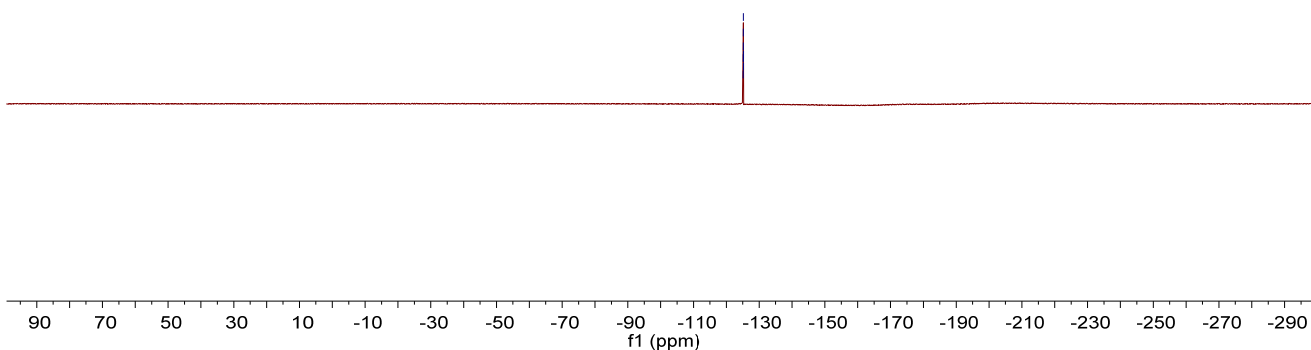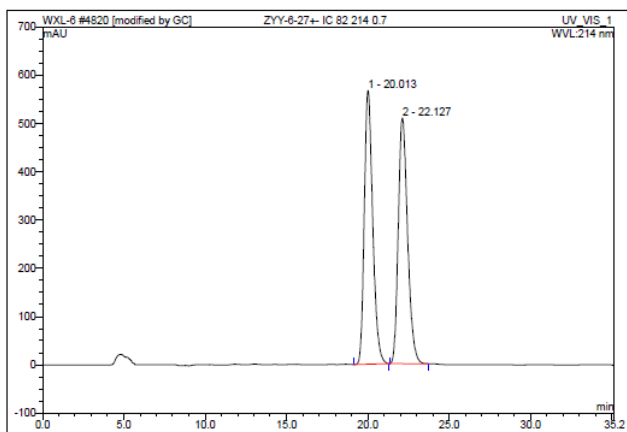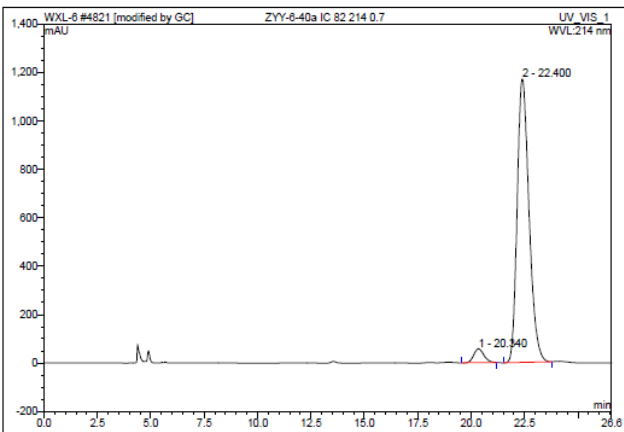

| No.           | Ret.Time min | Peak Name | Height mAU | Area mAU*min | Rel.Area % | Amount | Type |
|---------------|--------------|-----------|------------|--------------|------------|--------|------|
| 1             | 20.01        | n.a.      | 566.470    | 339.928      | 50.17      | n.a.   | BMB* |
| 2             | 22.13        | n.a.      | 508.922    | 337.643      | 49.83      | n.a.   | BMB* |
| <b>Total:</b> |              |           | 1075.392   | 677.570      | 100.00     | 0.000  |      |

| No.           | Ret.Time min | Peak Name | Height mAU | Area mAU*min | Rel.Area % | Amount | Type |
|---------------|--------------|-----------|------------|--------------|------------|--------|------|
| 1             | 20.34        | n.a.      | 56.926     | 31.119       | 3.97       | n.a.   | BMB* |
| 2             | 22.40        | n.a.      | 1170.189   | 753.285      | 96.03      | n.a.   | BMB* |
| <b>Total:</b> |              |           | 1227.115   | 784.404      | 100.00     | 0.000  |      |

Translation: Chiralcel IC column [ $\lambda = 214$  nm; eluent: Hexane/Isopropanol = 80/20; Flow rate: 0.70 mL/min;  $t_{\text{minor}} = 20.34$  min,  $t_{\text{major}} = 22.40$  min;  $ee\% = 92\%$ ]. (Note: In the 5 minute position, there is the peak of dichloromethane, due to that the sample was dissolved in dichloromethane for measuring).

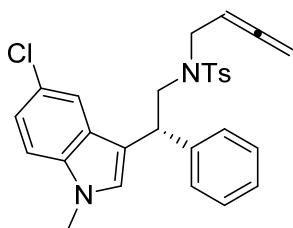

**(R)-N-(buta-2,3-dien-1-yl)-N-(2-(5-chloro-1-methyl-1H-indol-3-yl)-2-phenylethyl)-4-methylbenzenesulfonamide **1g****

A white solid, 46% yield (22.5 mg). M.p.: 112-115 °C. <sup>1</sup>H NMR (CDCl<sub>3</sub>, TMS, 400 MHz) δ 2.40 (s, 3H), 3.57-3.63 (m, 2H), 3.73 (s, 3H), 3.82-3.89 (m, 1H), 3.98 (dd, *J* = 13.6, 8.4 Hz, 1H), 4.54 (t, *J* = 8.0 Hz, 1H), 4.60-4.68 (m, 1H), 4.72-4.75 (m, 2H), 7.10-7.13 (m, 2H), 7.16-7.19 (m, 1H), 7.22-7.25 (m, 3H), 7.28-7.30 (m, 4H), 7.37 (d, *J* = 2.0 Hz, 1H), 7.60 (d, *J* = 8.0 Hz, 2H). <sup>13</sup>C NMR (CDCl<sub>3</sub>, 100 MHz, TMS) δ 21.5, 33.0, 41.0, 46.2, 50.7, 76.3, 85.1, 110.3, 114.1, 118.5, 121.9, 124.7, 126.8, 127.2, 128.2, 128.3, 128.4, 128.6, 129.7, 135.4, 137.0, 141.7, 143.3, 209.2. IR (CH<sub>2</sub>Cl<sub>2</sub>) ν 3028, 2922, 1953, 1598, 1478, 1336, 1155, 1091, 941, 852, 795, 701, 656 cm<sup>-1</sup>. MS (ESI) *m/z* (%): 491.15 (100) [M+H]<sup>+</sup>; HRMS (DART) Calcd. For C<sub>28</sub>H<sub>28</sub>N<sub>2</sub>O<sub>2</sub>ClS<sup>+</sup> [M+H]<sup>+</sup> requires 491.1555, found: 491.1552. Enantiomeric excess was determined by HPLC with a Chiralcel IC column [λ = 254 nm; eluent: Hexane/Isopropanol = 50/50; Flow rate: 0.70 mL/min; *t*<sub>minor</sub> = 10.30 min, *t*<sub>major</sub> = 11.34 min; ee% = 92%; [α]<sub>D</sub><sup>25</sup> = 37.33 (c 0.10, CH<sub>2</sub>Cl<sub>2</sub>)].

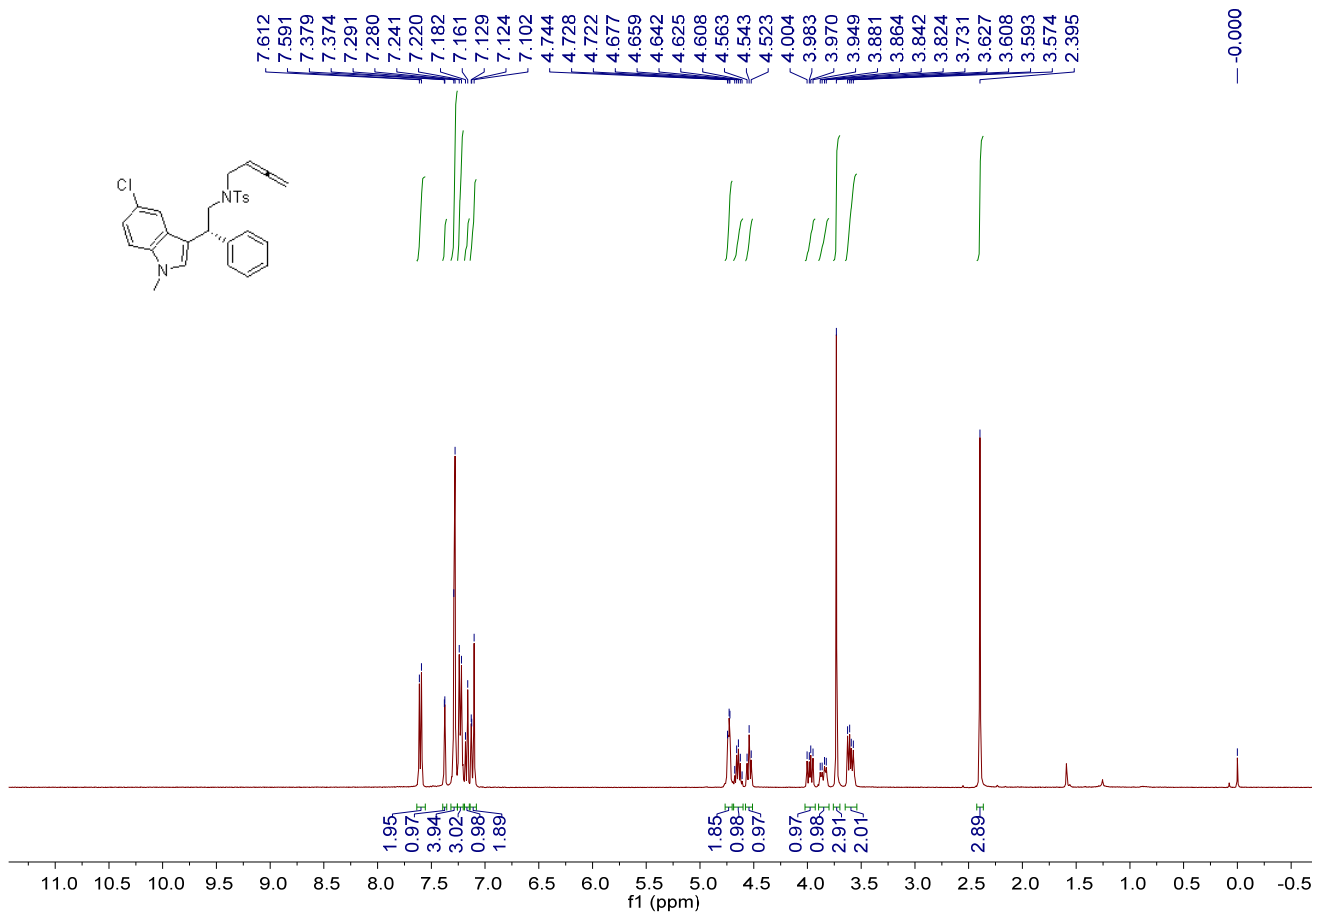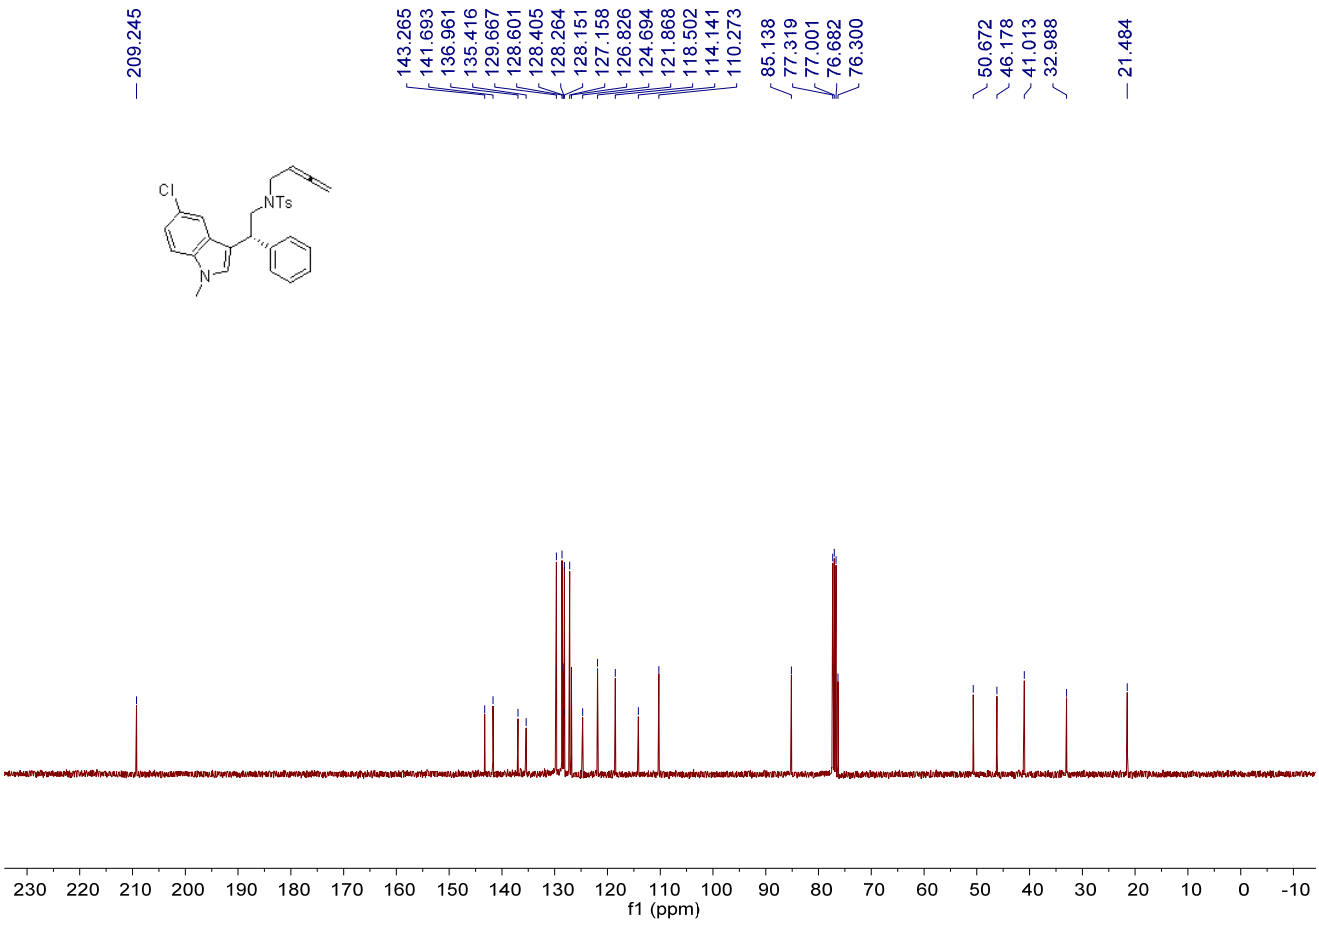

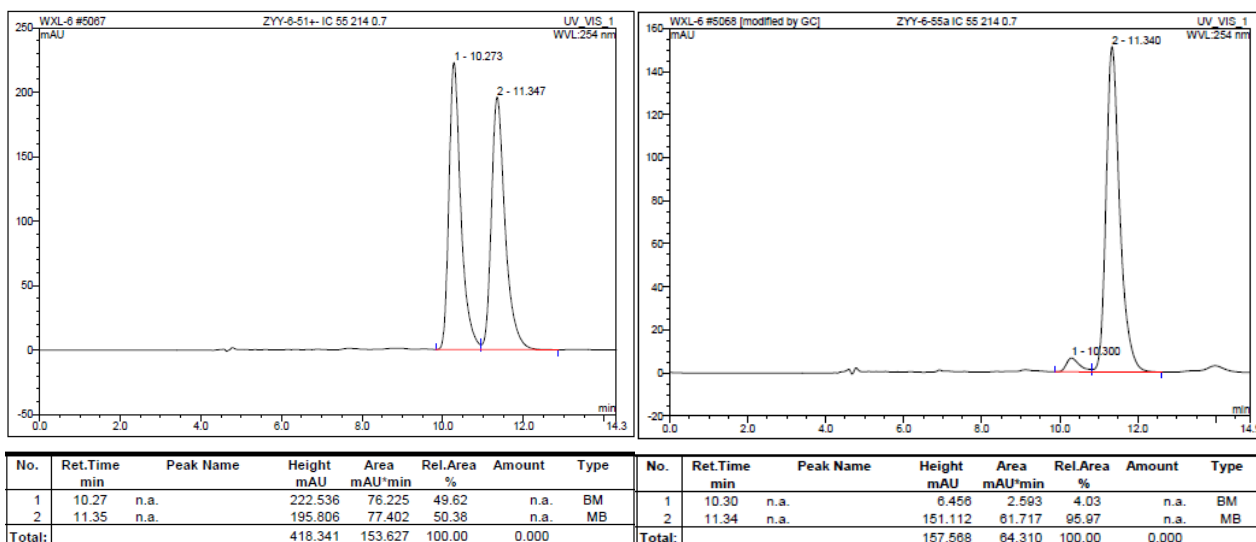

Translation: Chiralcel IC column [ $\lambda = 254$  nm; eluent: Hexane/Isopropanol = 50/50; Flow rate: 0.70 mL/min;  $t_{\text{minor}} = 10.30$  min,  $t_{\text{major}} = 11.34$  min; ee% = 92%].

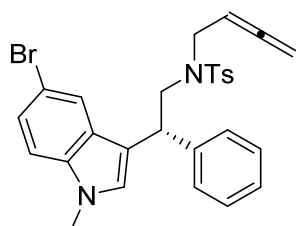

**(R)-N-(2-(5-bromo-1-methyl-1H-indol-3-yl)-2-phenylethyl)-N-(buta-2,3-dien-1-yl)-4-methylbenzenesulfonamide 1h**

A white solid, 48% yield (25.6 mg). M.p.: 101-104 °C.  $^1\text{H}$  NMR ( $\text{CDCl}_3$ , TMS, 400 MHz)  $\delta$  2.40 (s, 3H), 3.57-3.63 (m, 2H), 3.73 (s, 3H), 3.82-3.88 (m, 1H), 3.97 (dd,  $J = 13.6, 8.4$  Hz, 1H), 4.54 (t,  $J = 8.0$  Hz, 1H), 4.60-4.77 (m, 3H), 7.08 (s, 1H), 7.12-7.15 (m, 1H), 7.22-7.30 (m, 8H), 7.54 (d,  $J = 2.0$  Hz, 1H), 7.60 (d,  $J = 8.0$  Hz, 2H).  $^{13}\text{C}$  NMR ( $\text{CDCl}_3$ , 100 MHz, TMS)  $\delta$  21.5, 33.0, 41.0, 46.2, 50.7, 76.3, 85.2, 110.7, 112.3, 114.1, 121.6, 124.4, 126.8, 127.2, 128.2, 128.3, 128.6, 129.0, 129.7, 135.7, 137.0, 141.7, 143.3, 209.2. IR ( $\text{CH}_2\text{Cl}_2$ )  $\nu$  2913, 1952, 1597, 1475, 1335, 1157, 1061, 946, 842, 794, 708, 663  $\text{cm}^{-1}$ . MS (ESI)  $m/z$  (%): 535.10 (100)  $[\text{M}+\text{H}]^+$ ; HRMS (DART) Calcd. For  $\text{C}_{28}\text{H}_{28}\text{N}_2\text{O}_2\text{BrS}^+ [\text{M}+\text{H}]^+$  requires 535.1049, found: 535.1046. Enantiomeric excess was determined by HPLC with a Chiralcel IC column [ $\lambda = 214$  nm; eluent: Hexane/Isopropanol = 70/30; Flow rate: 0.70 mL/min;  $t_{\text{minor}} = 14.19$  min,  $t_{\text{major}} = 16.03$  min; ee% = 80%;  $[\alpha]_{\text{D}}^{25} = -30.0$  (c 0.10,  $\text{CH}_2\text{Cl}_2$ )].

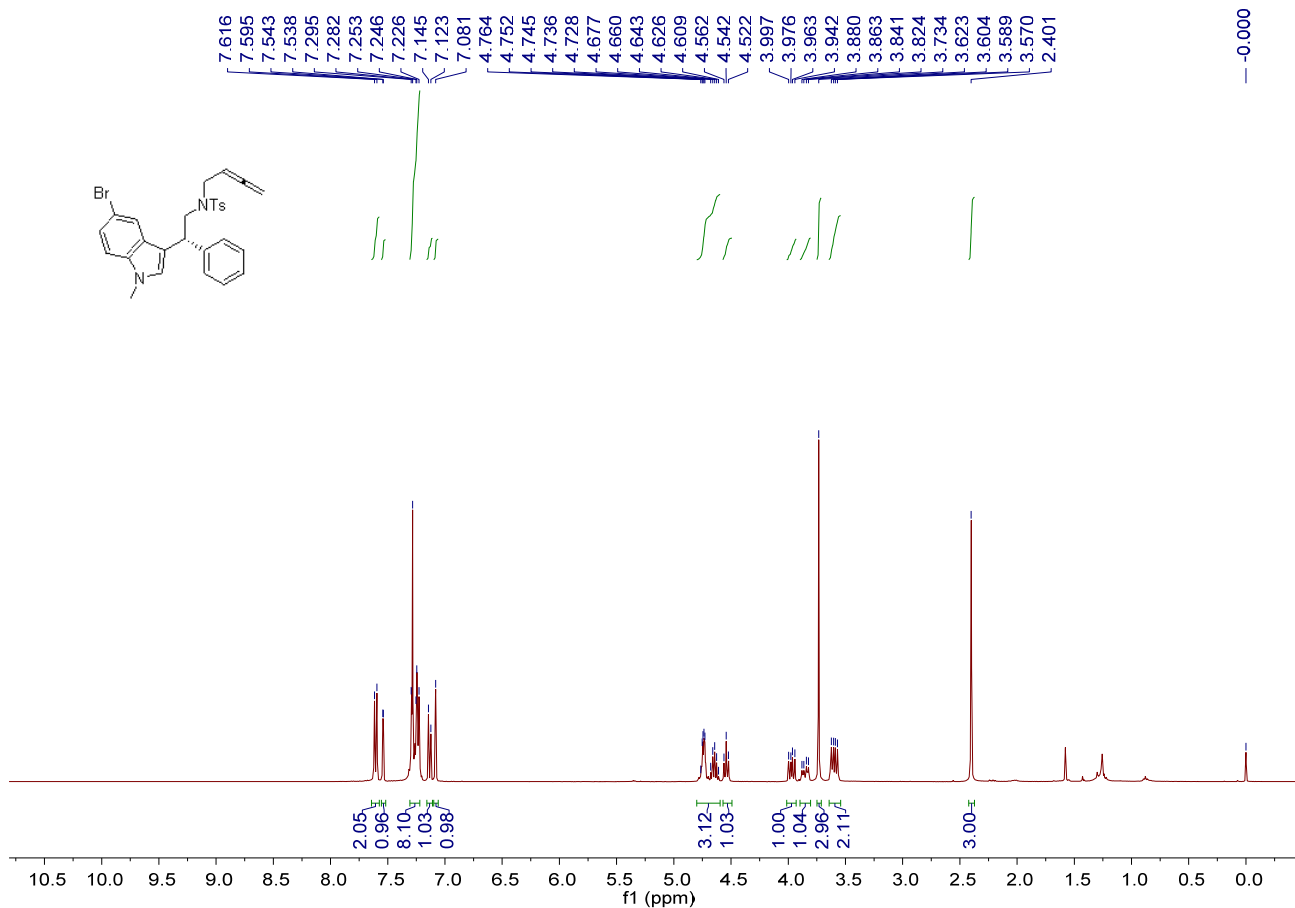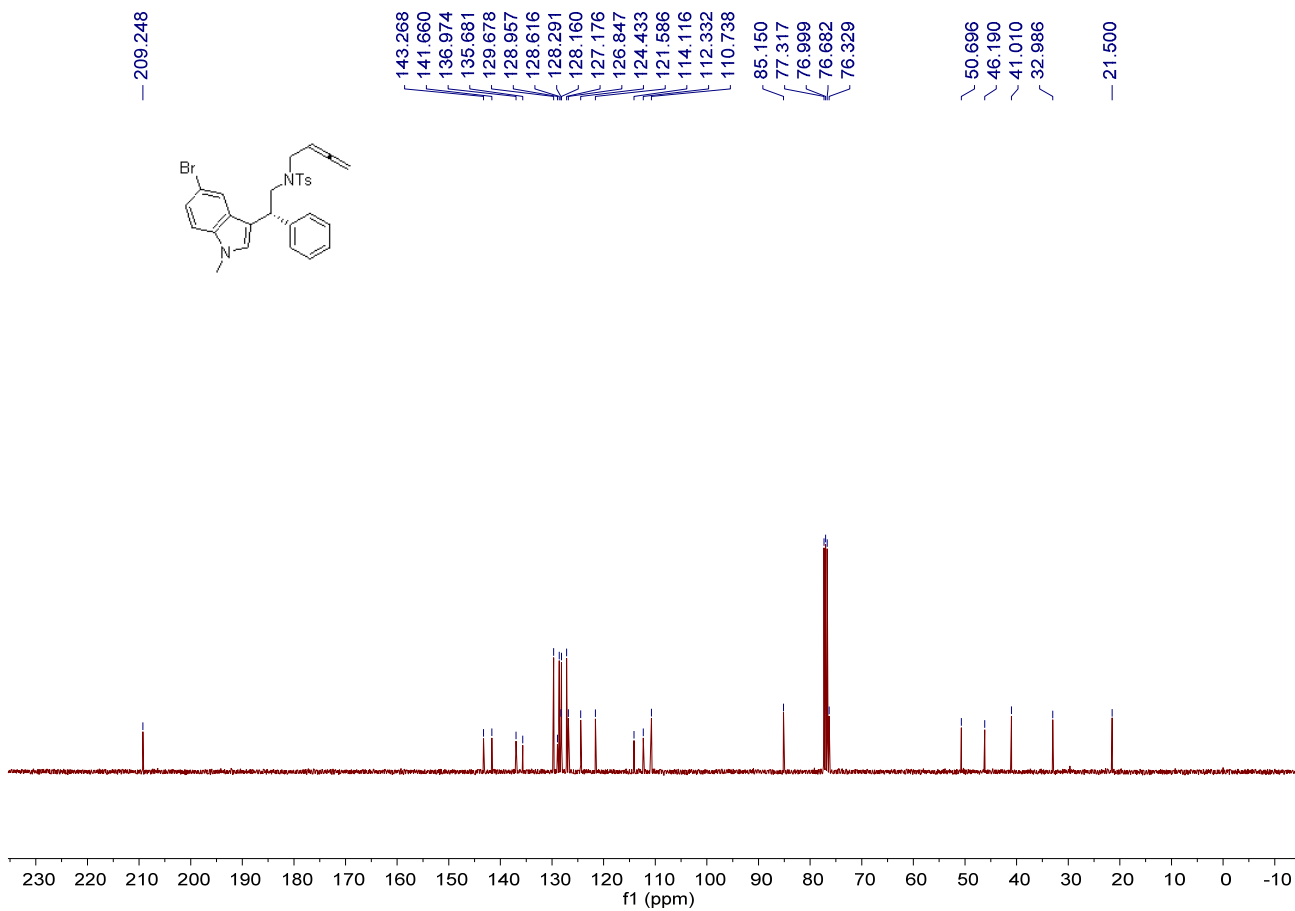

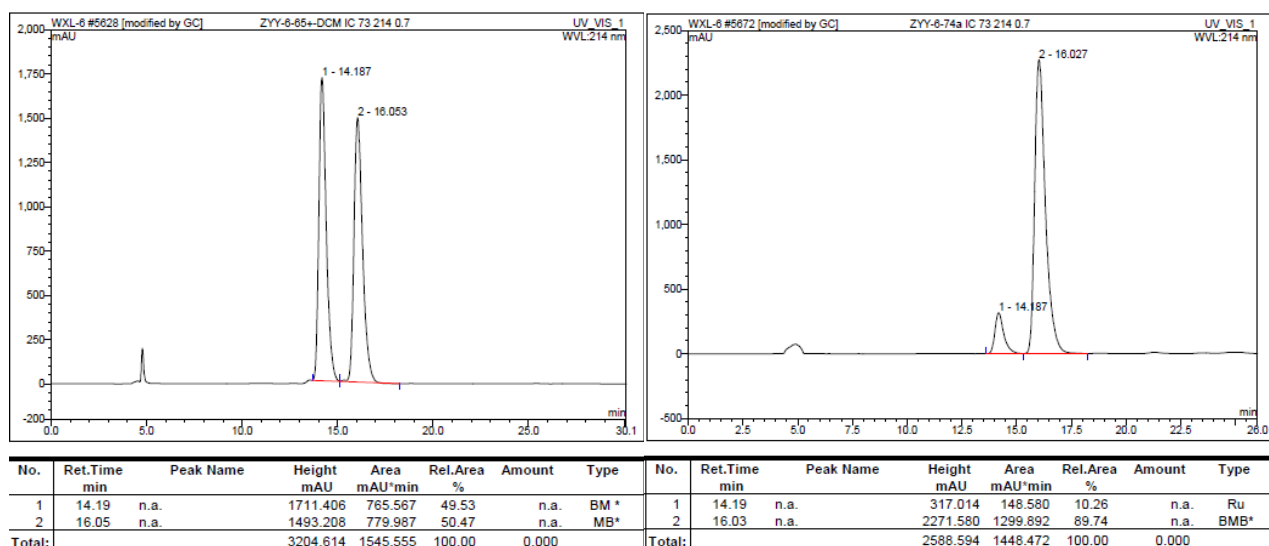

Translation: Chiralcel IC column [ $\lambda = 214$  nm; eluent: Hexane/Isopropanol = 70/30; Flow rate: 0.70 mL/min;  $t_{\text{minor}} = 14.19$  min,  $t_{\text{major}} = 16.03$  min; ee% = 80%]. (Note: In the 5 minute position, there is the peak of dichloromethane, due to that the sample was dissolved in dichloromethane for measuring).

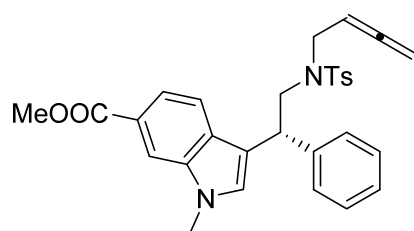

**(R)-Methyl 3-(2-(N-(buta-2,3-dien-1-yl)-4-methylphenylsulfonamido)-1-phenylethyl)-1-methyl-1H-indole-6-carboxylate 1i**

A white solid, 50% yield (25.7 mg). M.p.: 170-173 °C.  $^1\text{H}$  NMR ( $\text{CDCl}_3$ , TMS, 400 MHz)  $\delta$  2.40 (s, 3H), 3.54-3.63 (m, 2H), 3.83 (s, 3H), 3.84-3.90 (m, 1H), 3.93 (s, 3H), 4.03 (dd,  $J = 13.6, 8.4$  Hz, 1H), 4.61-4.72 (m, 4H), 7.22-7.26 (m, 4H), 7.29 (d,  $J = 8.4$  Hz, 4H), 7.45 (d,  $J = 8.4$  Hz, 1H), 7.60 (d,  $J = 8.4$  Hz, 2H), 7.69-7.73 (m, 1H), 8.05 (s, 1H).  $^{13}\text{C}$  NMR ( $\text{CDCl}_3$ , 100 MHz, TMS)  $\delta$  21.5, 33.0, 41.2, 46.3, 50.9, 51.9, 76.2, 85.2, 111.7, 115.1, 118.8, 120.0, 123.2, 126.8, 127.2, 128.2, 128.6, 129.7, 130.4, 130.8, 136.4, 137.0, 141.8, 143.3, 168.1, 209.3. IR ( $\text{CH}_2\text{Cl}_2$ )  $\nu$  2923, 2860, 1948, 1703, 1478, 1341, 1160, 1106, 979, 882, 748, 659  $\text{cm}^{-1}$ . MS (ESI)  $m/z$  (%): 515.19 (100)  $[\text{M}+\text{H}]^+$ ; HRMS (DART) Calcd. For  $\text{C}_{30}\text{H}_{31}\text{N}_2\text{O}_4\text{S}^+ [\text{M}+\text{H}]^+$  requires 515.1999, found: 515.1993. Enantiomeric excess was determined by HPLC with a Chiralcel IA column [ $\lambda = 214$  nm; eluent: Hexane/Isopropanol = 90/10; Flow rate: 0.70 mL/min;  $t_{\text{minor}} = 35.63$  min,  $t_{\text{major}} = 44.09$  min; ee% = 80%;  $[\alpha]_{\text{D}}^{25} = -17.8$  (c 0.12,  $\text{CH}_2\text{Cl}_2$ )].



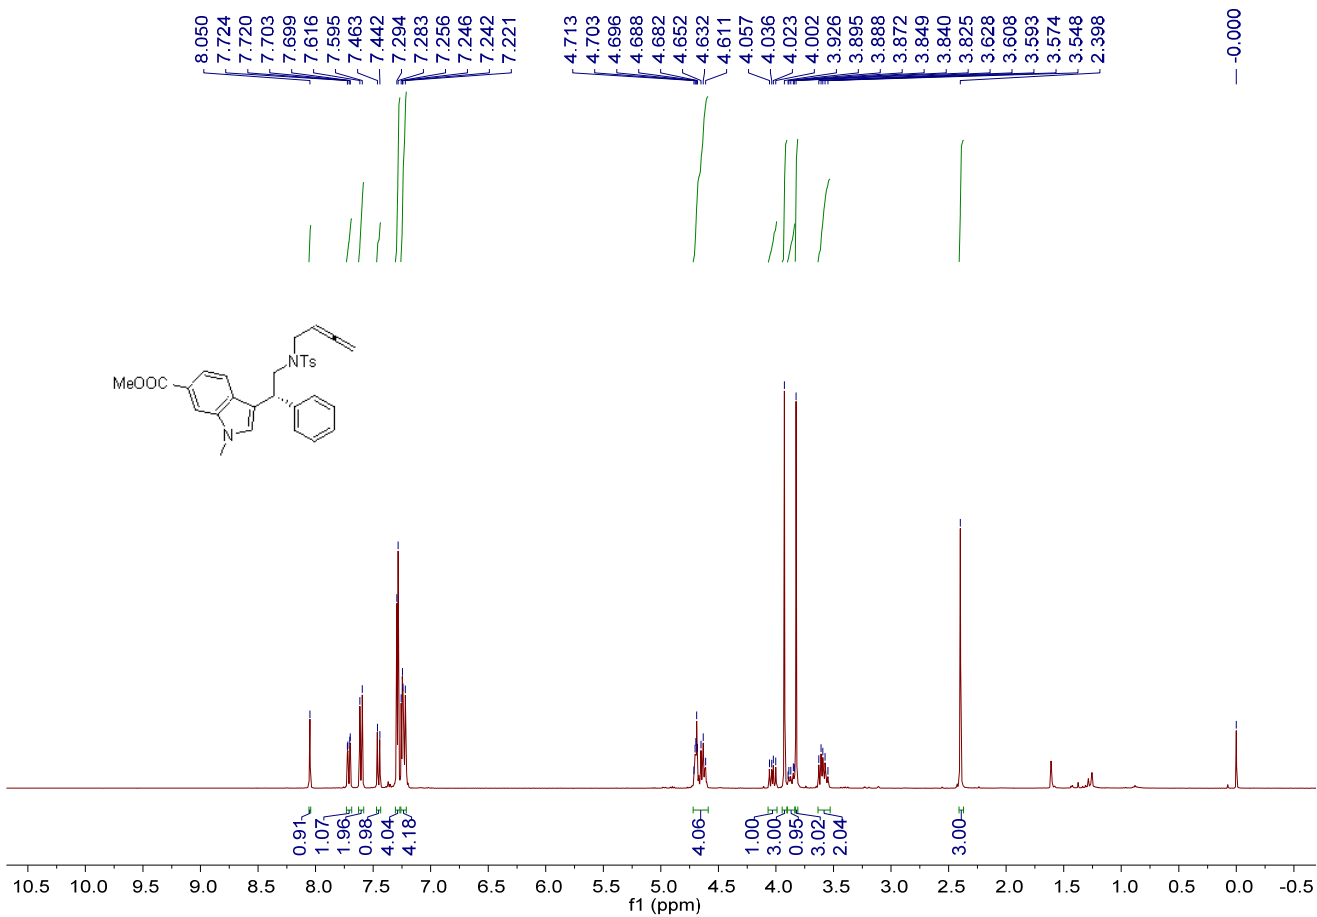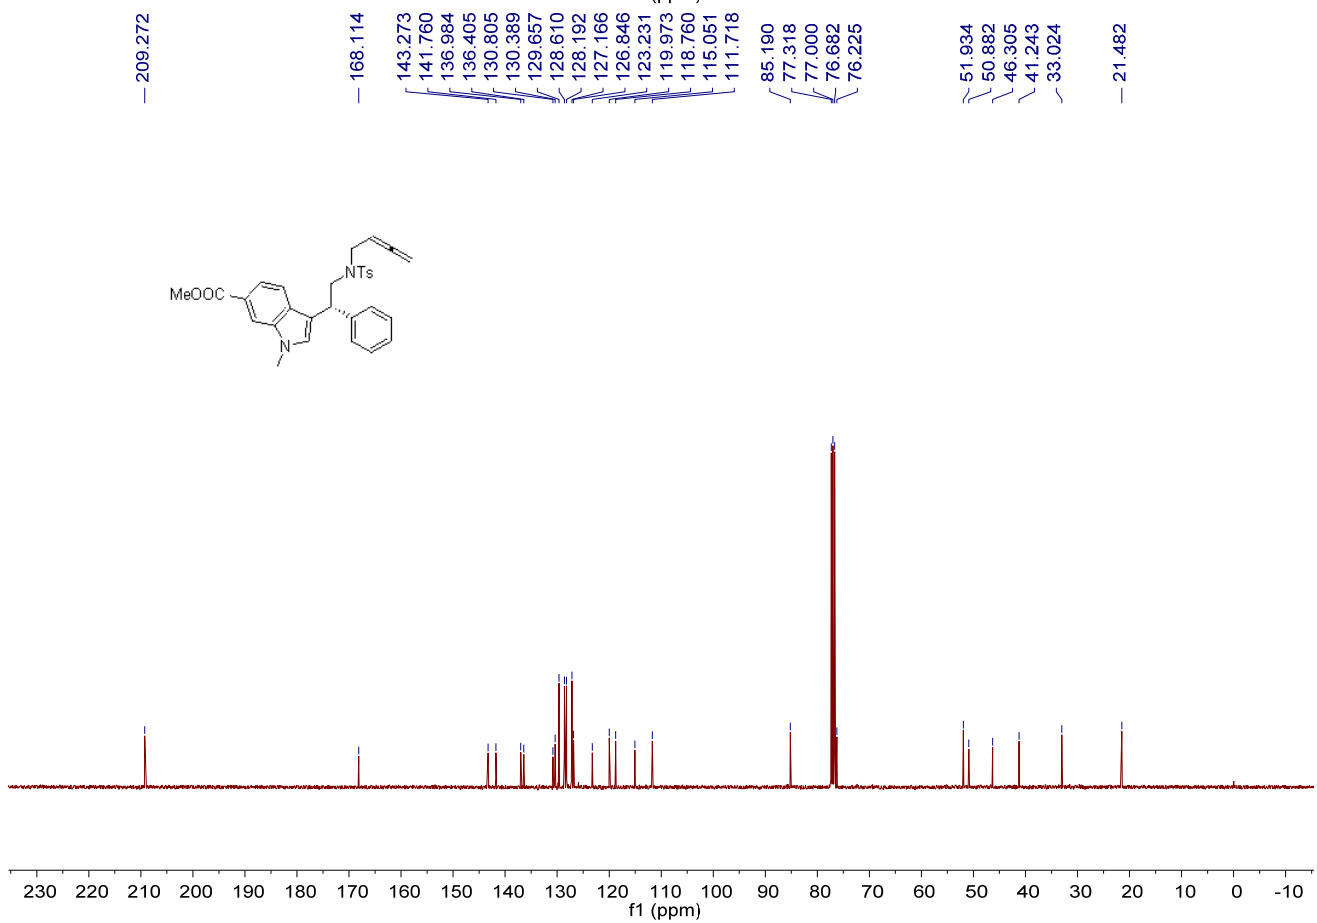

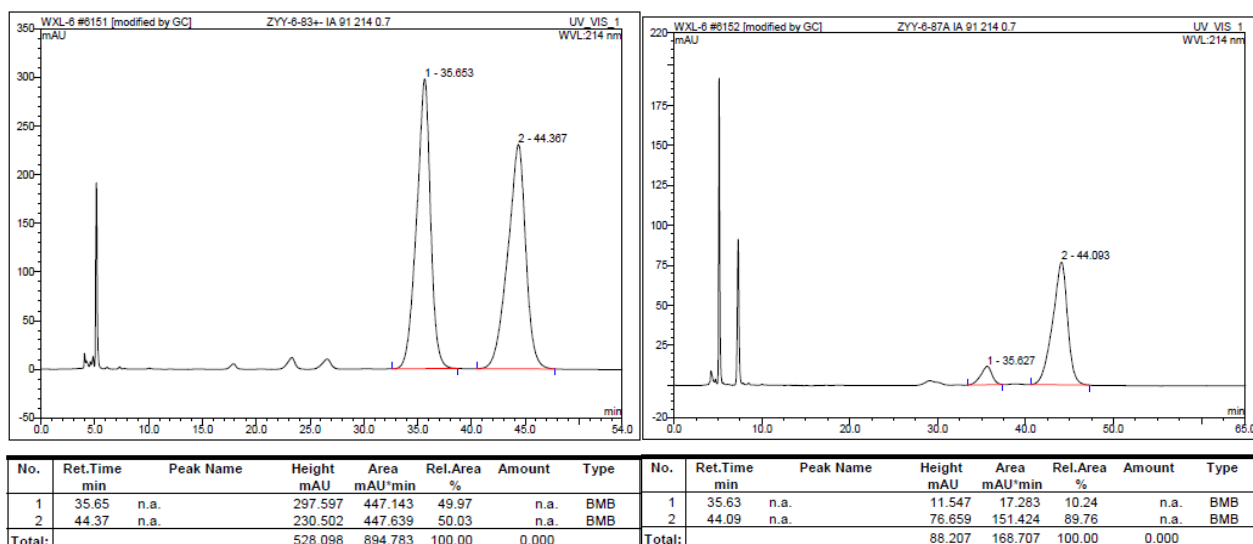

Translation: Chiralcel IA column [ $\lambda = 214$  nm; eluent: Hexane/Isopropanol = 90/10; Flow rate: 0.70 mL/min;  $t_{\text{minor}} = 35.63$  min,  $t_{\text{major}} = 44.09$  min; ee% = 80%]. (Note: In the 5 minute position, there is the peak of dichloromethane, due to that the sample was dissolved in dichloromethane for measuring).

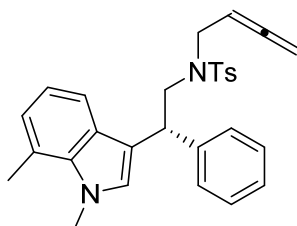

**(R)-N-(buta-2,3-dien-1-yl)-N-(2-(1,7-dimethyl-1H-indol-3-yl)-2-phenylethyl)-4-methylbenzenesulfonamide **1j****

A white solid, 46% yield (21.7 mg). M.p.: 102-105 °C.  $^1\text{H}$  NMR ( $\text{CDCl}_3$ , TMS, 400 MHz)  $\delta$  2.39 (s, 3H), 2.74 (s, 3H), 3.53-3.65 (m, 2H), 3.84-3.92 (m, 1H), 3.98 (dd,  $J = 13.6, 7.6$  Hz, 1H), 4.01 (s, 3H), 4.58 (t,  $J = 8.0$  Hz, 1H), 4.64-4.72 (m, 3H), 6.87-6.91 (m, 3H), 7.19-7.31 (m, 8H), 7.60 (d,  $J = 8.0$  Hz, 2H).  $^{13}\text{C}$  NMR ( $\text{CDCl}_3$ , 100 MHz, TMS)  $\delta$  19.7, 21.5, 36.8, 41.1, 46.2, 50.7, 76.2, 85.3, 114.2, 117.2, 119.2, 121.2, 124.3, 126.6, 127.2, 128.30, 128.34, 128.5, 128.7, 129.6, 135.7, 137.2, 142.1, 143.1, 209.3. IR ( $\text{CH}_2\text{Cl}_2$ )  $\nu$  2923, 2867, 1956, 1451, 1156, 959, 808, 769, 660  $\text{cm}^{-1}$ . MS (ESI)  $m/z$  (%): 471.20 (100)  $[\text{M}+\text{H}]^+$ ; HRMS (DART) Calcd. For  $\text{C}_{29}\text{H}_{31}\text{N}_2\text{O}_2\text{S}^+$   $[\text{M}+\text{H}]^+$  requires 471.2101, found: 471.2097. Enantiomeric excess was determined by HPLC with a Chiralcel ID3 column [ $\lambda = 214$  nm; eluent: Hexane/Isopropanol = 80/20; Flow rate: 0.70 mL/min;  $t_{\text{minor}} = 13.29$  min,  $t_{\text{major}} = 14.58$  min; ee% = 97%;  $[\alpha]_{\text{D}}^{25} = -119.6$  (c 0.6,  $\text{CH}_2\text{Cl}_2$ )].

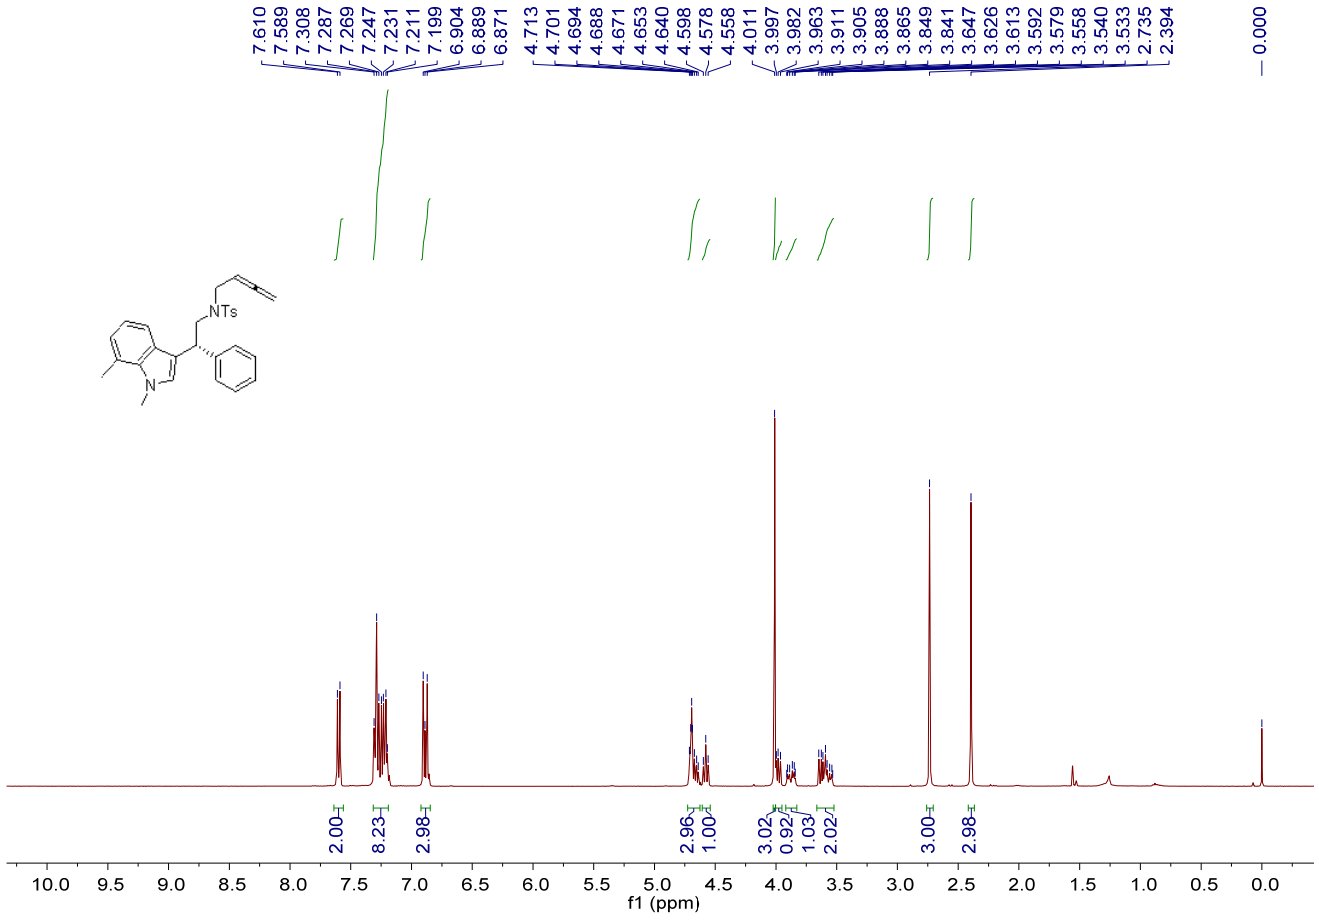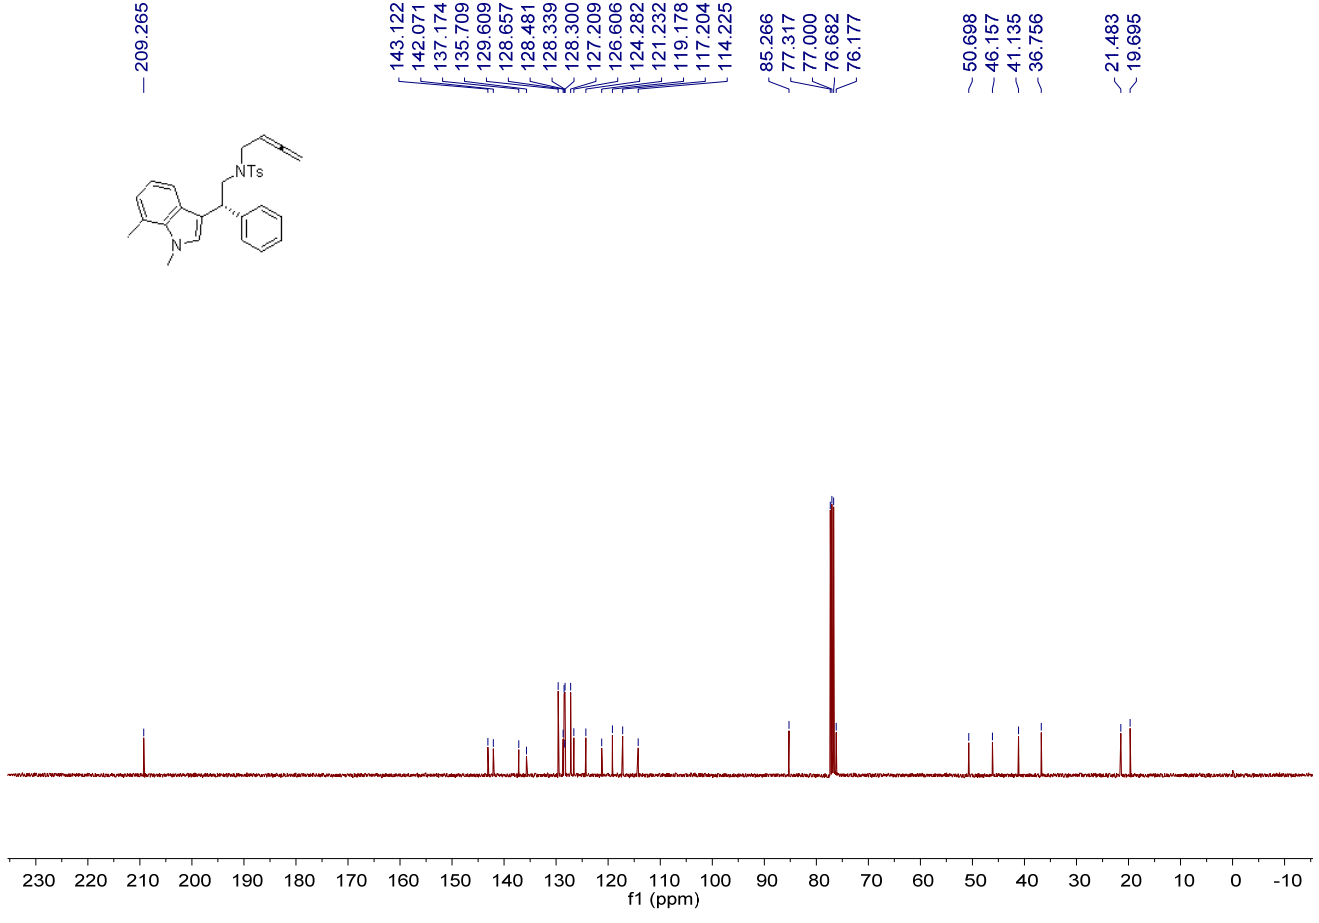

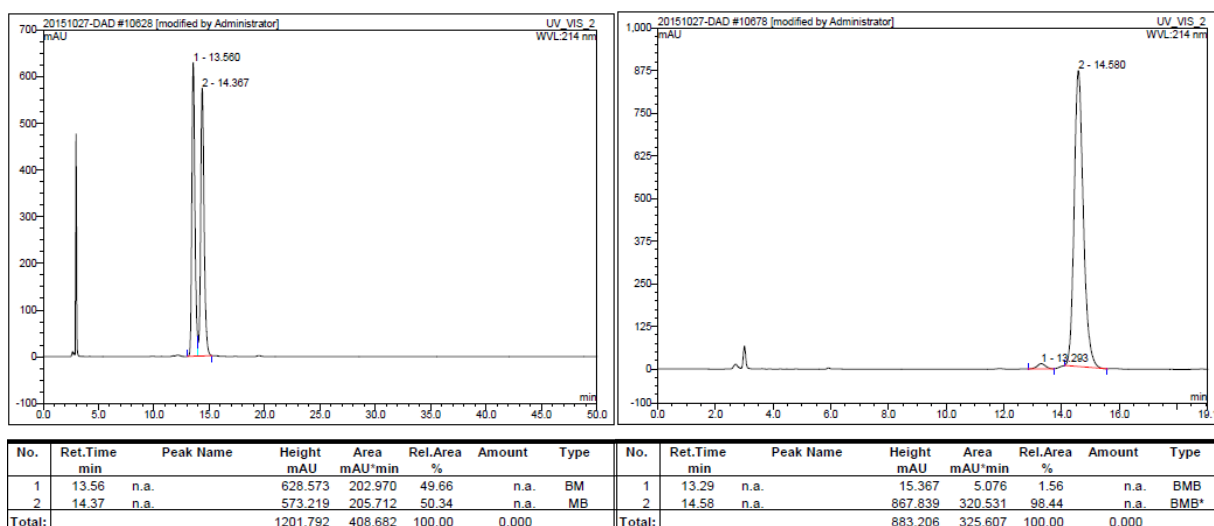

Translation: Chiralcel ID3 column [ $\lambda = 214$  nm; eluent: Hexane/Isopropanol = 80/20; Flow rate: 0.70 mL/min;  $t_{\text{minor}} = 13.29$  min,  $t_{\text{major}} = 14.58$  min; ee% = 97%]. (Note: In the 5 minute position, there is the peak of dichloromethane, due to that the sample was dissolved in dichloromethane for measuring).

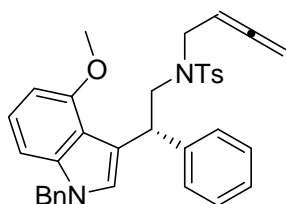

**(R)-N-(2-(1-benzyl-4-methoxy-1H-indol-3-yl)-2-phenylethyl)-N-(buta-2,3-dien-1-yl)-4-methylbenzenesulfonamide 1k**

A white solid, 47% yield (26.4 mg). M.p.: 107-110 °C.  $^1\text{H}$  NMR ( $\text{CDCl}_3$ , TMS, 400 MHz)  $\delta$  2.37 (s, 3H), 3.63-3.71 (m, 2H), 3.77 (s, 3H), 3.89-4.00 (m, 2H), 4.68-4.78 (m, 3H), 5.07 (t,  $J = 8.0$  Hz, 1H), 5.24 (s, 2H), 6.40 (d,  $J = 8.0$  Hz, 1H), 6.80 (d,  $J = 8.0$  Hz, 1H), 6.98-7.30 (m, 14H), 7.56 (d,  $J = 8.0$  Hz, 2H).  $^{13}\text{C}$  NMR ( $\text{CDCl}_3$ , 100 MHz, TMS)  $\delta$  21.5, 41.3, 45.9, 50.3, 51.5, 54.9, 76.0, 85.7, 99.5, 103.2, 115.8, 117.6, 122.5, 125.6, 126.2, 126.6, 127.3, 127.5, 128.2, 128.6, 128.7, 129.6, 137.3, 137.6, 138.2, 143.0, 143.1, 154.6, 209.1. IR ( $\text{CH}_2\text{Cl}_2$ )  $\nu$  3027, 2925, 1954, 1578, 1497, 1338, 1257, 1156, 1091, 940, 850, 730, 699  $\text{cm}^{-1}$ . MS (ESI)  $m/z$  (%): 563.23 (100)  $[\text{M}+\text{H}]^+$ ; HRMS (DART) Calcd. For  $\text{C}_{35}\text{H}_{35}\text{N}_2\text{O}_3\text{S}^+ [\text{M}+\text{H}]^+$  requires 563.2363, found: 563.2355. Enantiomeric excess was determined by HPLC with a Chiralcel IA column [ $\lambda = 214$  nm; eluent: Hexane/Isopropanol = 90/10; Flow rate: 0.70 mL/min;  $t_{\text{minor}} = 21.02$  min,  $t_{\text{major}} = 18.78$  min; ee% = 96%;  $[\alpha]_{\text{D}}^{25} = -80.0$  (c 0.10,  $\text{CH}_2\text{Cl}_2$ )].

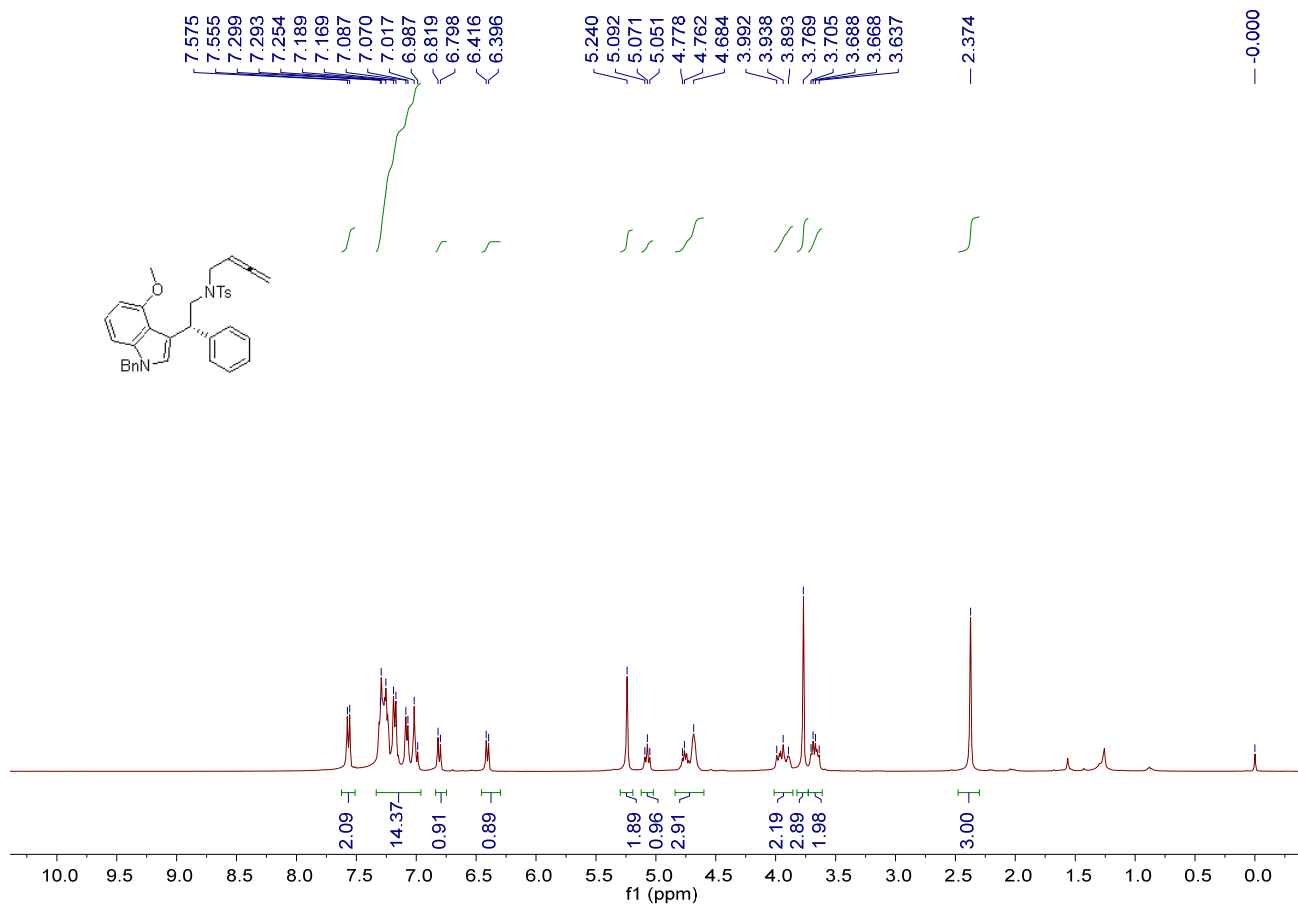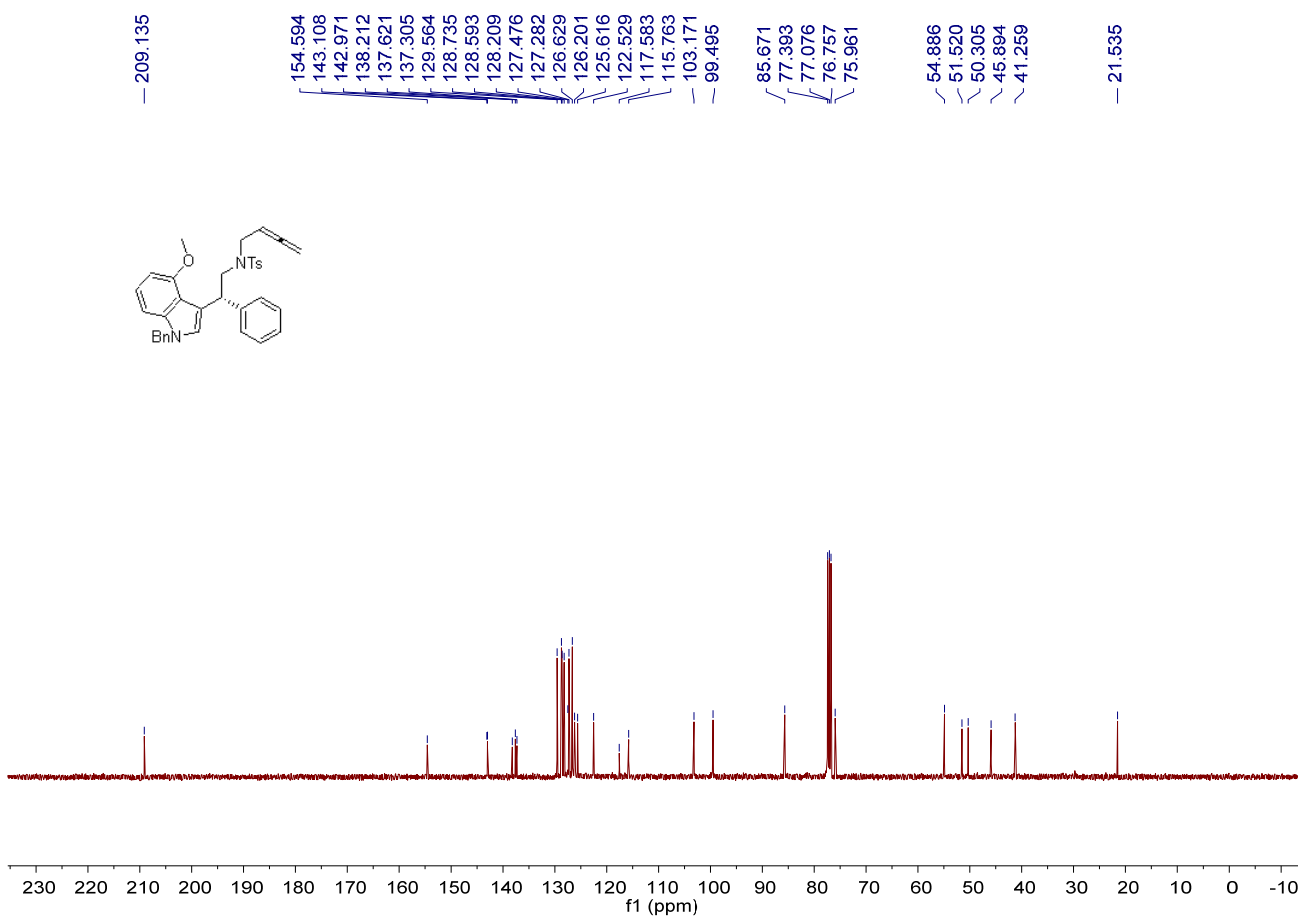

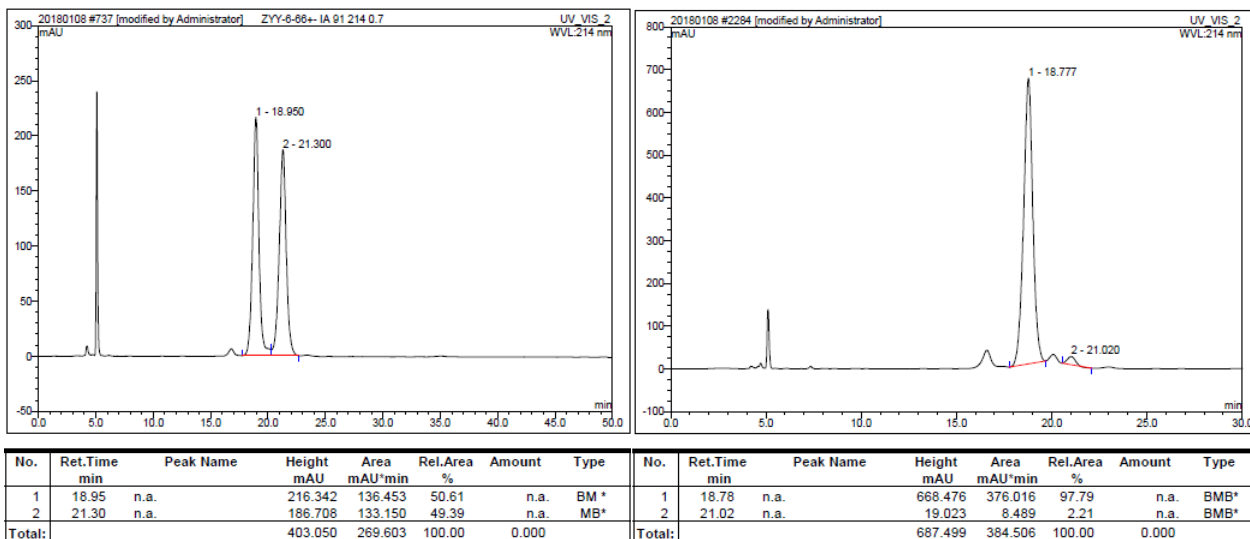

Translation: Chiralcel IA column [ $\lambda = 214$  nm; eluent: Hexane/Isopropanol = 90/10; Flow rate: 0.70 mL/min;  $t_{\text{minor}} = 21.02$  min,  $t_{\text{major}} = 18.78$  min; ee% = 96%]. (Note: In the 5 minute position, there is the peak of dichloromethane, due to that the sample was dissolved in dichloromethane for measuring).

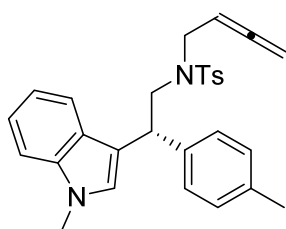

**(R)-N-(buta-2,3-dien-1-yl)-4-methyl-N-(2-(1-methyl-1H-indol-3-yl)-2-(p-tolyl)ethyl)benzenesulfonamide 11**

A white solid, 48% yield (22.6 mg). M.p.: 66-69 °C.  $^1\text{H}$  NMR ( $\text{CDCl}_3$ , TMS, 400 MHz)  $\delta$  2.30 (s, 3H), 2.39 (s, 3H), 3.56-3.66 (m, 2H), 3.74 (s, 3H), 3.83-3.91 (m, 1H), 4.00 (dd,  $J = 13.6, 7.6$  Hz, 1H), 4.58 (t,  $J = 8.0$  Hz, 1H), 4.64-4.71 (m, 3H), 7.00 (s, 1H), 7.02-7.09 (m, 3H), 7.16-7.26 (m, 6H), 7.47 (d,  $J = 8.0$  Hz, 1H), 7.60 (d,  $J = 8.0$  Hz, 2H).  $^{13}\text{C}$  NMR ( $\text{CDCl}_3$ , 100 MHz, TMS)  $\delta$  21.0, 21.5, 32.8, 40.9, 46.2, 50.8, 76.1, 85.3, 109.2, 114.9, 118.8, 119.2, 121.6, 126.9, 127.2, 127.3, 128.1, 129.2, 129.6, 136.1, 137.0, 137.2, 139.0, 143.1, 209.3. IR ( $\text{CH}_2\text{Cl}_2$ )  $\nu$  2923, 1953, 1325, 1155, 1092, 812, 739, 656  $\text{cm}^{-1}$ . MS (ESI)  $m/z$  (%): 471.20 (100)  $[\text{M}+\text{H}]^+$ ; HRMS (DART) Calcd. For  $\text{C}_{29}\text{H}_{31}\text{N}_2\text{O}_2\text{S}^+ [\text{M}+\text{H}]^+$  requires 471.2101, found: 471.2096. Enantiomeric excess was determined by HPLC with a Chiralcel IA column [ $\lambda = 214$  nm; eluent: Hexane/Isopropanol = 95/5; Flow rate: 0.70 mL/min;  $t_{\text{minor}} = 24.13$  min,  $t_{\text{major}} = 21.33$  min; ee% = 98%;  $[\alpha]_{\text{D}}^{25} = -35.3$  (c 0.10,  $\text{CH}_2\text{Cl}_2$ )].

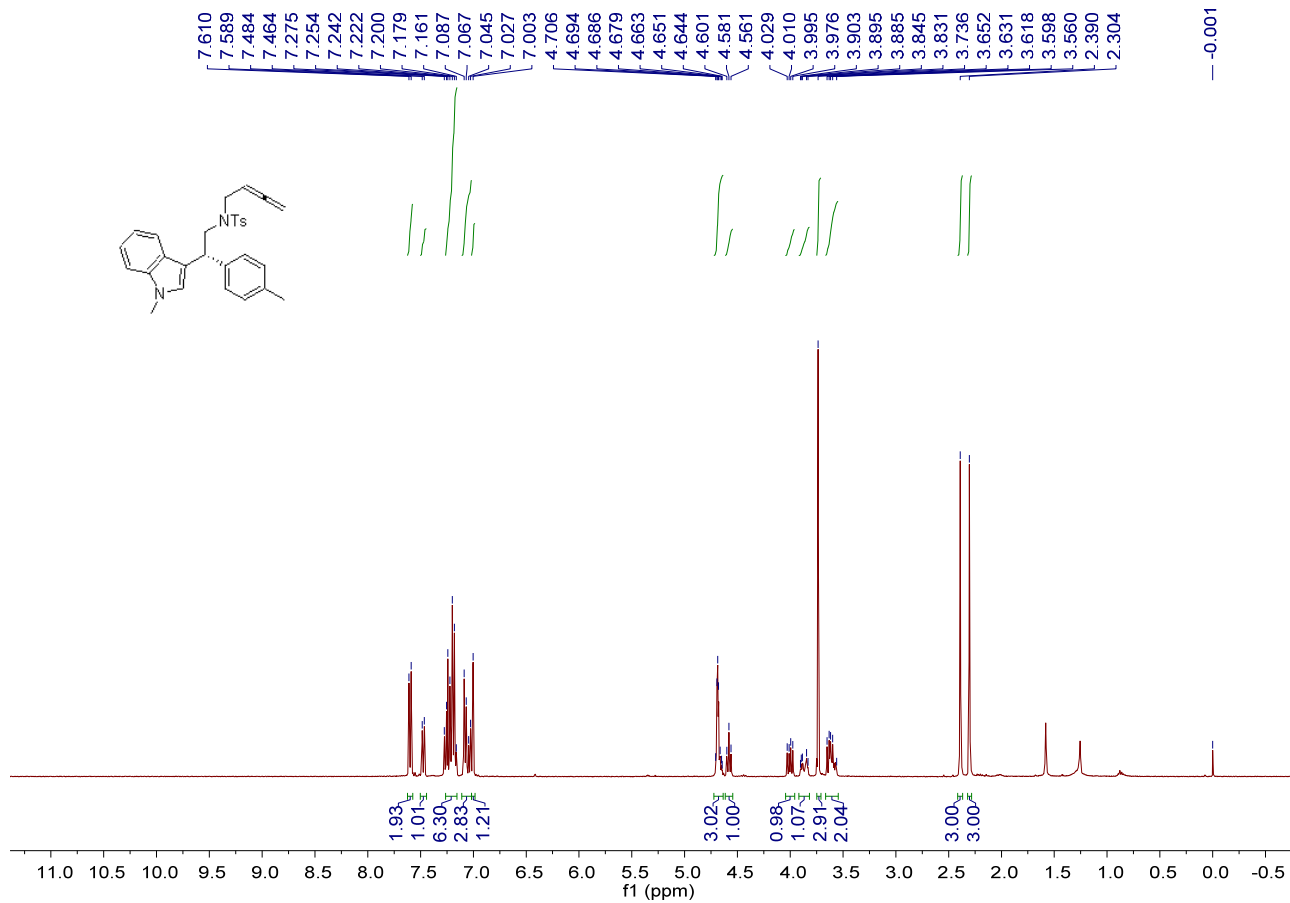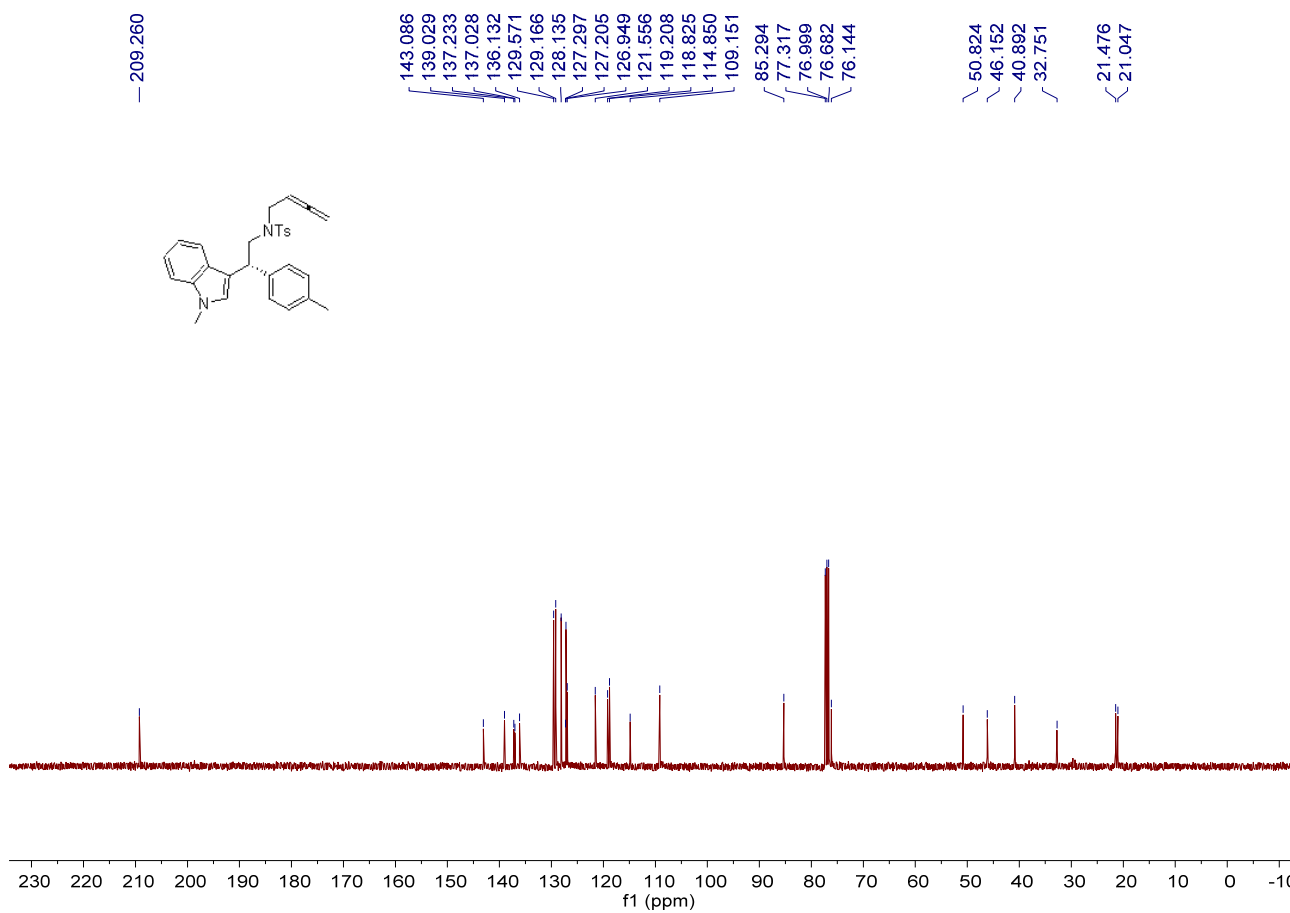

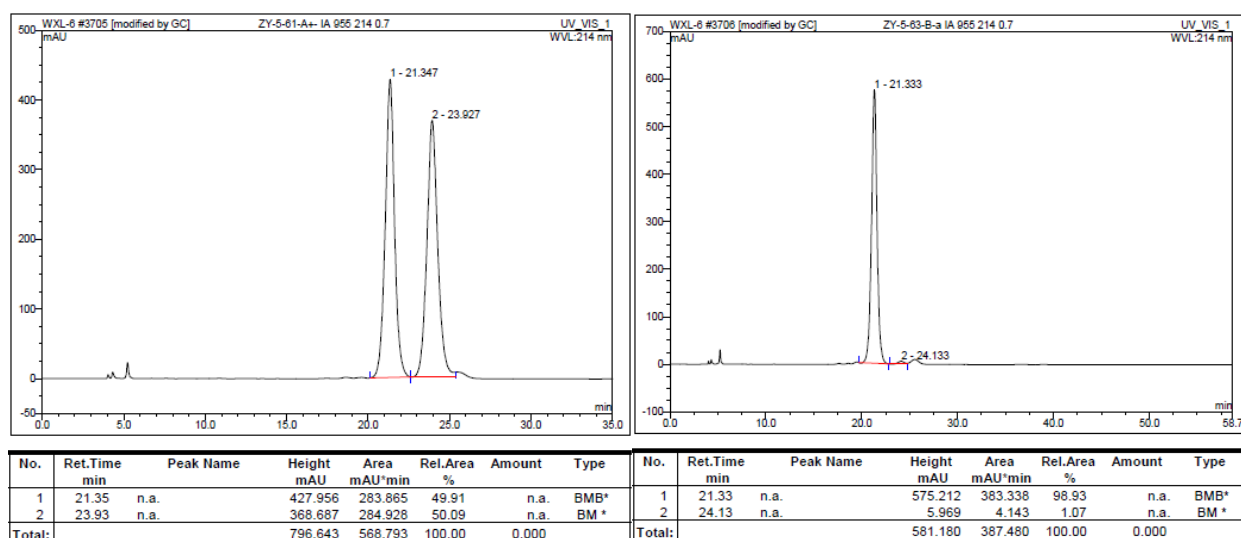

Translation: Chiralcel IA column [ $\lambda = 214$  nm; eluent: Hexane/Isopropanol = 95/5; Flow rate: 0.70 mL/min;  $t_{\text{minor}} = 24.13$  min,  $t_{\text{major}} = 21.33$  min; ee% = 98%]. (Note: In the 5-minute position, there is the peak of dichloromethane, due to that the sample was dissolved in dichloromethane for measuring).

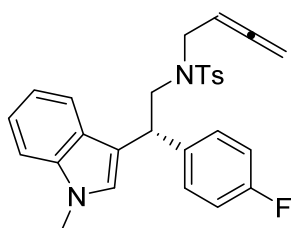

**(R)-N-(buta-2,3-dien-1-yl)-N-(2-(4-fluorophenyl)-2-(1-methyl-1H-indol-3-yl)ethyl)-4-methylbenzenesulfonamide 1m**

A white solid, 44% yield (20.9 mg). M.p.: 109-112 °C.  $^1\text{H}$  NMR ( $\text{CDCl}_3$ , TMS, 400 MHz)  $\delta$  2.40 (s, 3H), 3.55-3.66 (m, 2H), 3.75 (s, 3H), 3.80-3.88 (m, 1H), 3.96 (dd,  $J = 13.6, 7.2$  Hz, 1H), 4.62 (t,  $J = 8.0$  Hz, 1H), 4.65-4.71 (m, 3H), 6.93-6.98 (m, 3H), 7.01-7.06 (m, 1H), 7.17-7.30 (m, 6H), 7.43 (d,  $J = 8.0$  Hz, 1H), 7.60 (d,  $J = 8.0$  Hz, 2H).  $^{13}\text{C}$  NMR ( $\text{CDCl}_3$ , 100 MHz, TMS)  $\delta$  21.5, 32.8, 40.7, 46.4, 50.9, 76.2, 85.3, 109.3, 114.6, 115.2 (d,  $J = 21.2$  Hz), 119.0 (d,  $J = 16.9$  Hz), 121.8, 126.8, 127.1, 127.2, 129.6, 129.7 (d,  $J = 7.9$  Hz), 137.1, 137.7 (d,  $J = 3.0$  Hz), 143.2, 161.6 (d,  $J = 243.3$  Hz), 209.3.  $^{19}\text{F}$  NMR ( $\text{CDCl}_3$ , 376 MHz,  $\text{CFCl}_3$ )  $\delta$  -116.3. IR ( $\text{CH}_2\text{Cl}_2$ )  $\nu$  2920, 2854, 1951, 1599, 1503, 1336, 1154, 1100, 1090, 969, 837, 747, 658  $\text{cm}^{-1}$ . MS (ESI)  $m/z$  (%): 475.18 (100)  $[\text{M}+\text{H}]^+$ ; HRMS (DART) Calcd. For  $\text{C}_{28}\text{H}_{28}\text{N}_2\text{O}_2\text{FS}^+ [\text{M}+\text{H}]^+$  requires 475.1850, found: 475.1846. Enantiomeric excess was determined by HPLC with a Chiralcel IG column [ $\lambda = 214$  nm; eluent: Hexane/Isopropanol = 90/10; Flow rate: 0.70 mL/min;  $t_{\text{minor}} = 49.95$  min,  $t_{\text{major}} = 44.47$  min; ee% = 98%;  $[\alpha]_{\text{D}}^{25} = -41.5$  (c 0.20,



CH<sub>2</sub>Cl<sub>2</sub>].

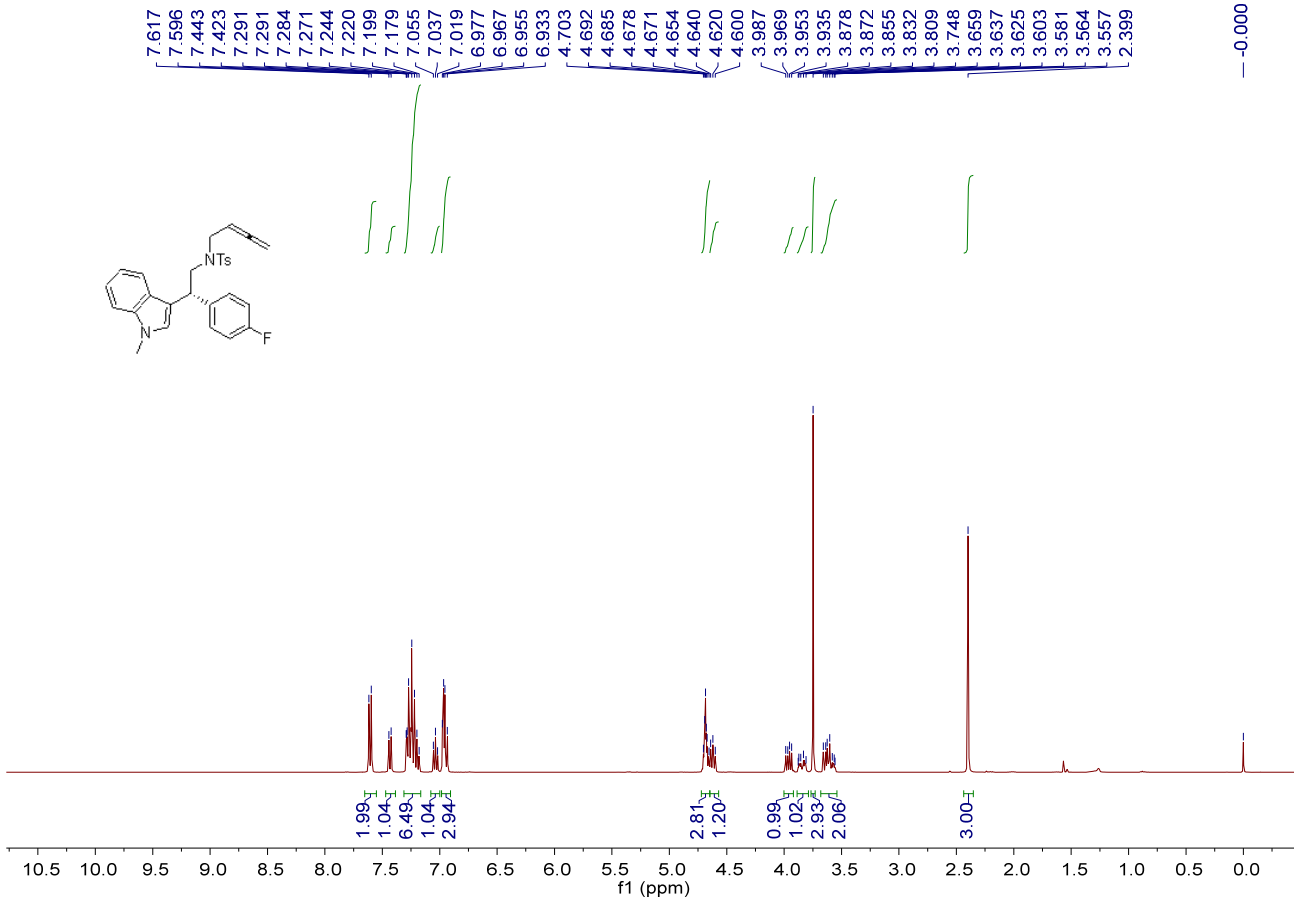

— 209.272

162.839  
160.406  
143.246  
137.765  
137.735  
137.061  
129.781  
129.702  
129.640  
127.171  
127.089  
126.773  
121.750  
119.137  
118.968  
115.367  
115.155  
114.625  
109.265

85.296  
77.317  
77.000  
76.682  
76.209

50.909  
46.415  
40.711  
32.780

— 21.477

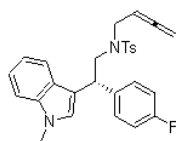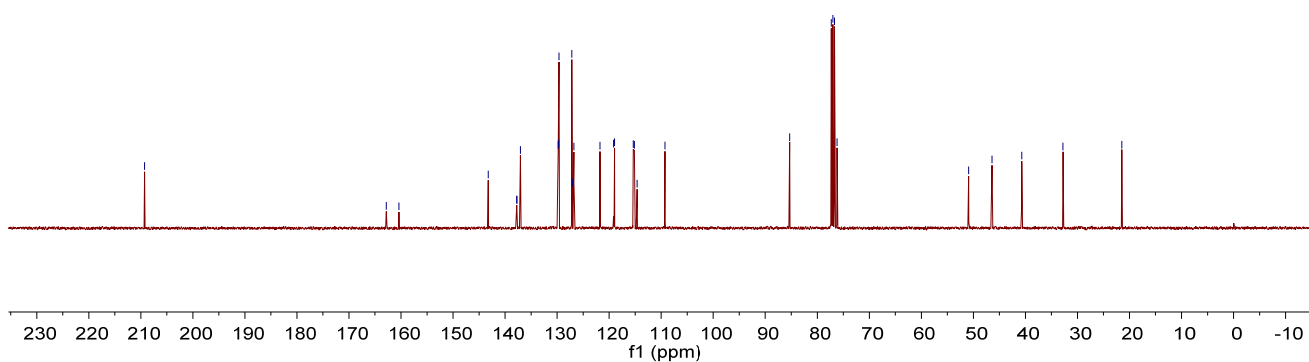

-116.280  
-116.294  
-116.303  
-116.317  
-116.330  
-116.340  
-116.354

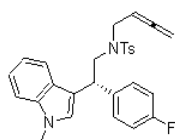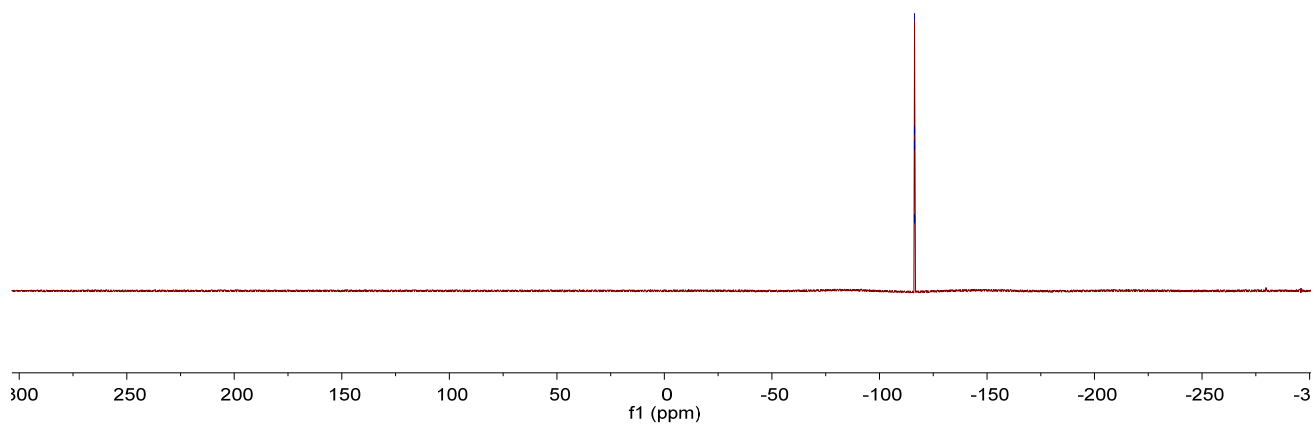

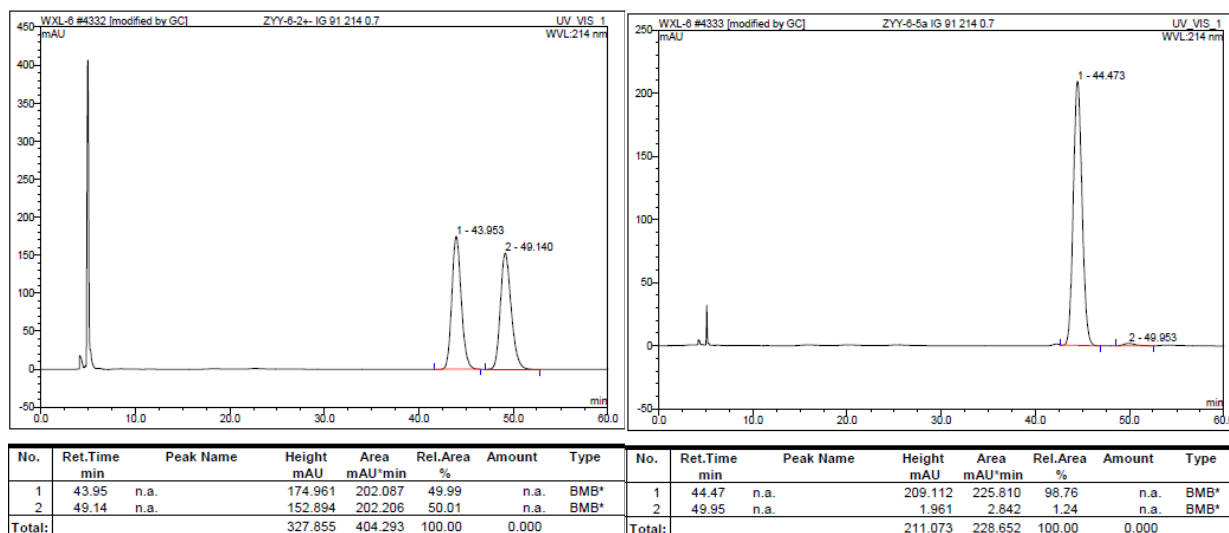

Translation: Chiralcel IG column [ $\lambda = 214$  nm; eluent: Hexane/Isopropanol = 90/10; Flow rate: 0.70 mL/min;  $t_{\text{minor}} = 49.95$  min,  $t_{\text{major}} = 44.47$  min; ee% = 98%]. (Note: In the 5 minute position, there is the peak of dichloromethane, due to that the sample was dissolved in dichloromethane for measuring).

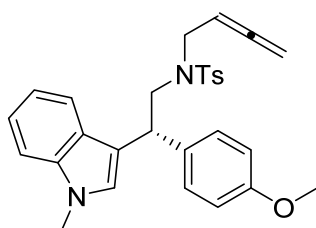

**(R)-N-(buta-2,3-dien-1-yl)-N-(2-(4-methoxyphenyl)-2-(1-methyl-1H-indol-3-yl)ethyl)-4-methylbenzenesulfonamide **1n****

A white solid, 46% yield (22.3 mg). M.p.: 61-64 °C.  $^1\text{H}$  NMR ( $\text{CDCl}_3$ , TMS, 400 MHz)  $\delta$  2.40 (s, 3H), 3.54-3.63 (m, 2H), 3.75 (s, 3H), 3.78 (s, 3H), 3.83-3.91 (m, 1H), 3.98 (dd,  $J = 14.0, 7.6$  Hz, 1H), 4.57 (t,  $J = 8.0$  Hz, 1H), 4.62-4.70 (m, 3H), 6.81 (d,  $J = 8.0$  Hz, 2H), 6.98-7.06 (m, 2H), 7.17-7.29 (m, 6H), 7.47 (d,  $J = 8.0$  Hz, 1H), 7.61 (d,  $J = 8.0$  Hz, 2H).  $^{13}\text{C}$  NMR ( $\text{CDCl}_3$ , 100 MHz, TMS)  $\delta$  21.4, 32.7, 40.5, 46.2, 50.9, 55.1, 76.1, 85.3, 109.1, 113.8, 115.0, 118.8, 119.2, 121.5, 126.8, 127.1, 127.2, 129.2, 129.6, 134.1, 137.0, 137.1, 143.1, 158.2, 209.2. IR ( $\text{CH}_2\text{Cl}_2$ )  $\nu$  2931, 1953, 1610, 1510, 1325, 1248, 1154, 1092, 814, 739, 656  $\text{cm}^{-1}$ . MS (ESI)  $m/z$  (%): 487.20 (100)  $[\text{M}+\text{H}]^+$ ; HRMS (ESI) Calcd. For  $\text{C}_{29}\text{H}_{31}\text{N}_2\text{O}_3\text{S}^+ [\text{M}+\text{H}]^+$  requires 487.2050, found: 487.2046. Enantiomeric excess was determined by HPLC with a Chiralcel IA column [ $\lambda = 214$  nm; eluent: Hexane/Isopropanol = 90/10; Flow rate: 0.70 mL/min;  $t_{\text{minor}} = 25.87$  min,  $t_{\text{major}} = 22.80$  min; ee% = 97%;  $[\alpha]_{\text{D}}^{25} = -71.6$  (c 0.70,  $\text{CH}_2\text{Cl}_2$ )].

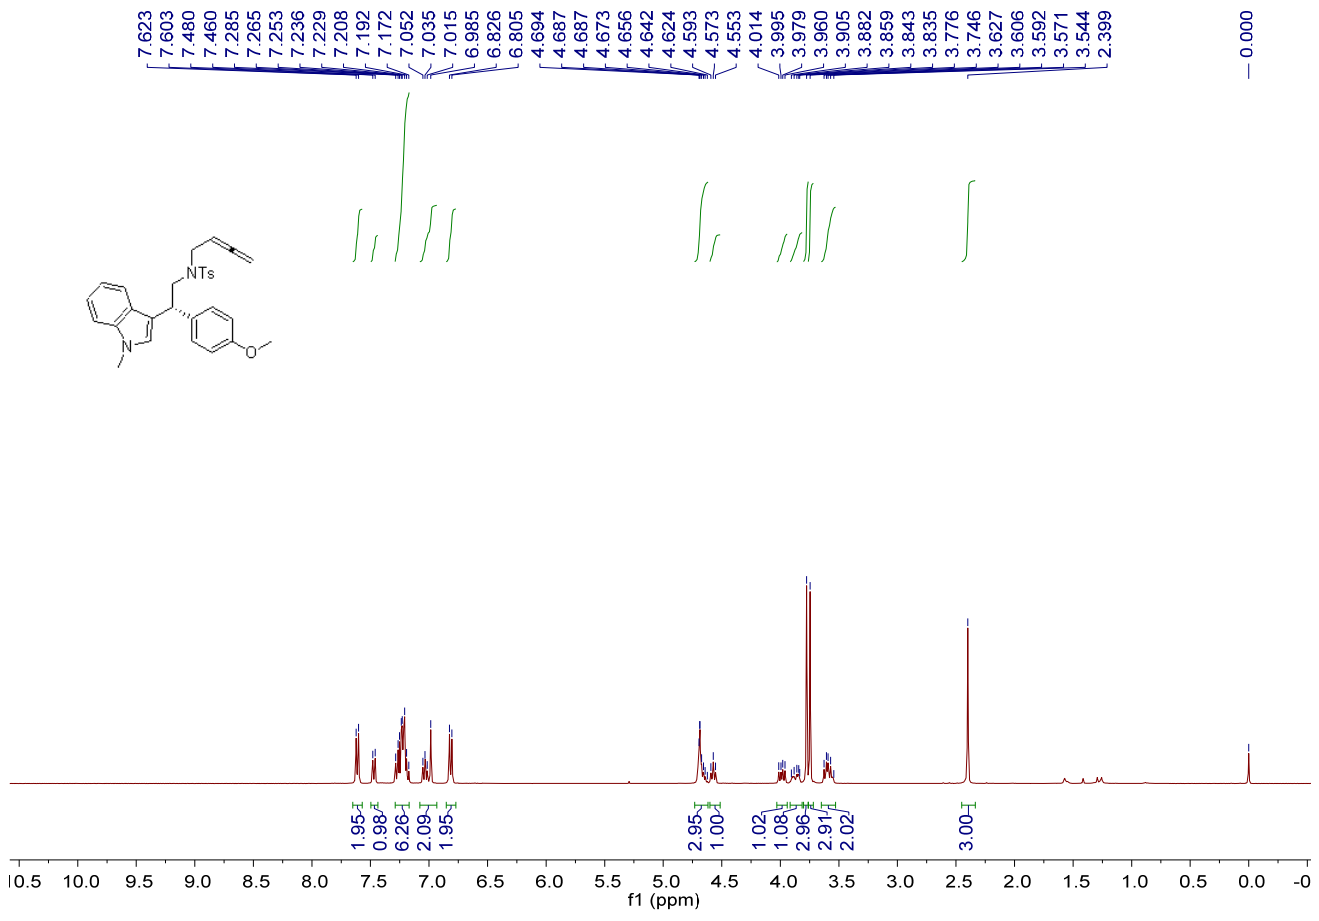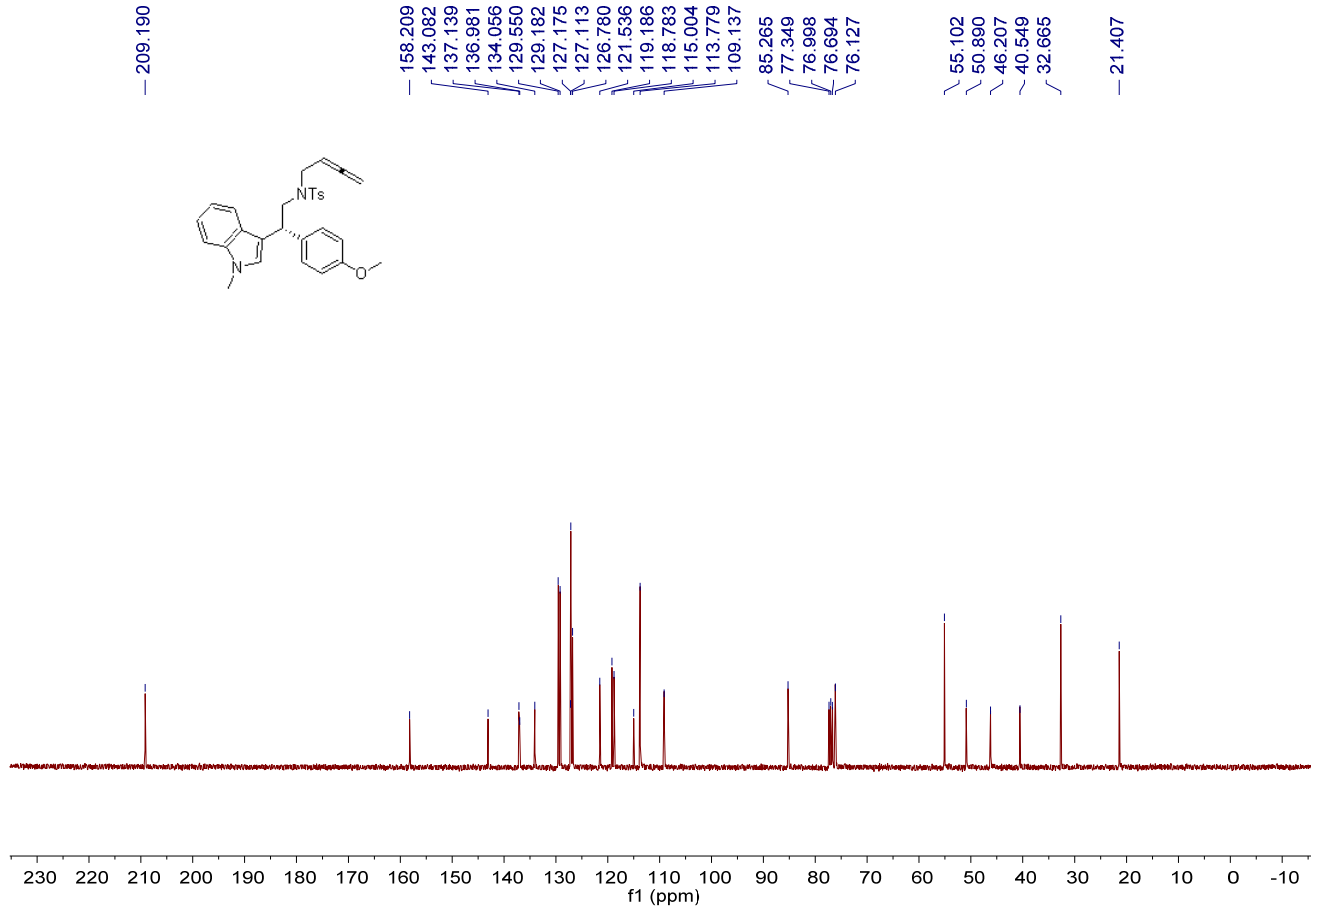

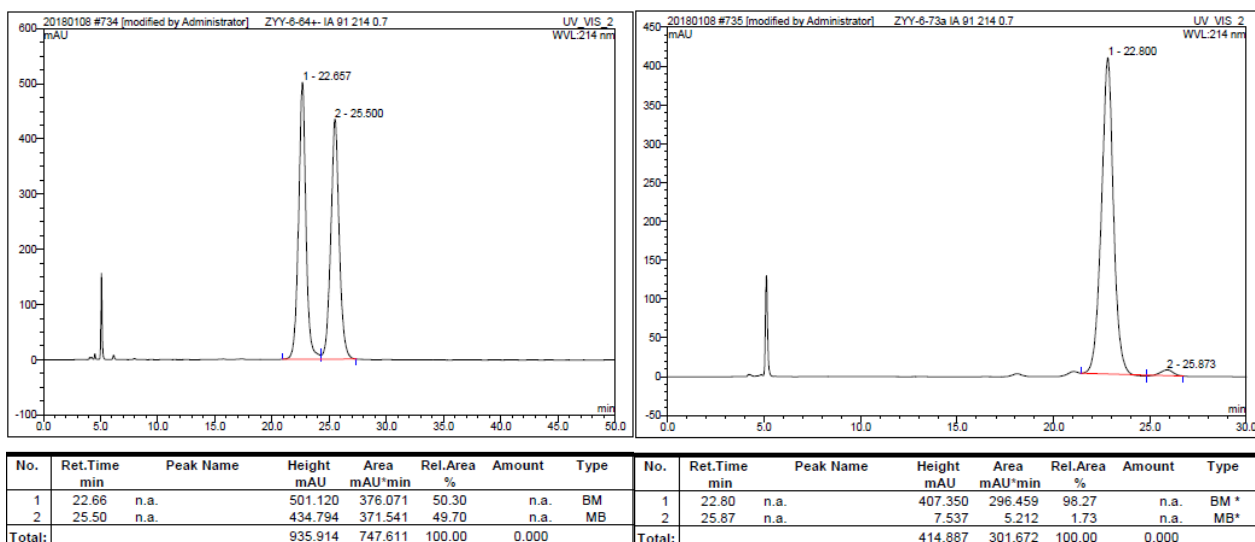

Translation: Chiralcel IA column [ $\lambda = 214$  nm; eluent: Hexane/Isopropanol = 90/10; Flow rate: 0.70 mL/min;  $t_{\text{minor}} = 25.87$  min,  $t_{\text{major}} = 22.80$  min; ee% = 97%]. (Note: In the 5 minute position, there is the peak of dichloromethane, due to that the sample was dissolved in dichloromethane for measuring).

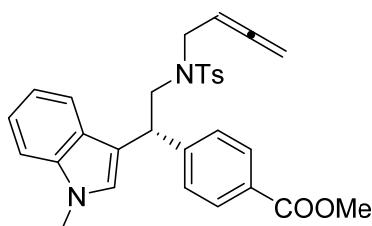

**(R)-methyl 4-(2-(N-(buta-2,3-dien-1-yl)-4-methylphenylsulfonamido)-1-(1-methyl-1H-indol-3-yl)ethyl)benzoate 10**

A white solid, 44% yield (22.8 mg). M.p.: 152-155 °C.  $^1\text{H}$  NMR ( $\text{CDCl}_3$ , TMS, 400 MHz)  $\delta$  2.40 (s, 3H), 3.56-3.62 (m, 1H), 3.65-3.72 (m, 1H), 3.75 (s, 3H), 3.84 (dd,  $J = 15.6, 6.8$  Hz, 1H), 3.90 (s, 3H), 3.99 (dd,  $J = 14.0, 7.2$  Hz, 1H), 4.63-4.72 (m, 4H), 6.98 (s, 1H), 7.01-7.06 (m, 1H), 7.18-7.24 (m, 3H), 7.28 (d,  $J = 8.0$  Hz, 1H), 7.38 (d,  $J = 8.0$  Hz, 2H), 7.43 (d,  $J = 8.0$  Hz, 1H), 7.60 (d,  $J = 8.0$  Hz, 2H), 7.94 (d,  $J = 8.0$  Hz, 2H).  $^{13}\text{C}$  NMR ( $\text{CDCl}_3$ , 100 MHz, TMS)  $\delta$  21.5, 32.8, 41.6, 46.5, 50.6, 52.0, 76.3, 85.3, 109.3, 114.0, 119.0, 119.1, 121.8, 126.8, 127.0, 127.2, 128.4, 128.6, 129.7, 129.8, 136.97, 137.02, 143.3, 147.5, 166.9, 209.3. IR ( $\text{CH}_2\text{Cl}_2$ )  $\nu$  2948, 1954, 1716, 1610, 1435, 1328, 1278, 1158, 1018, 936, 852, 741, 658  $\text{cm}^{-1}$ . MS (ESI)  $m/z$  (%): 515.19 (100)  $[\text{M}+\text{H}]^+$ ; HRMS (DART) Calcd. For  $\text{C}_{30}\text{H}_{31}\text{N}_2\text{O}_4\text{S}^+ [\text{M}+\text{H}]^+$  requires 515.1999, found: 515.1993. (Note: compound 30 was reduced to the corresponding alcohol 30' to determine enantiomeric excess.)

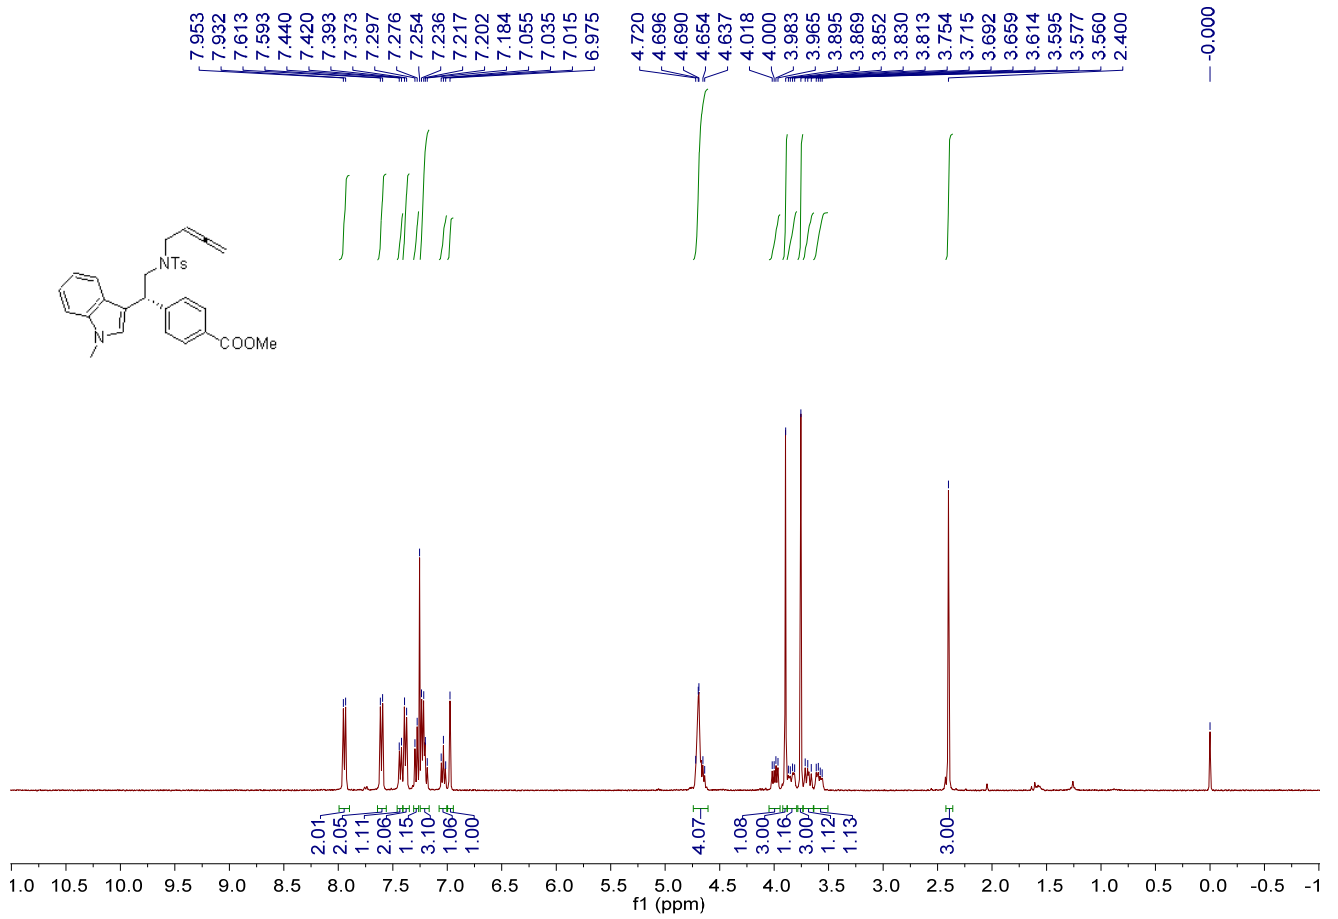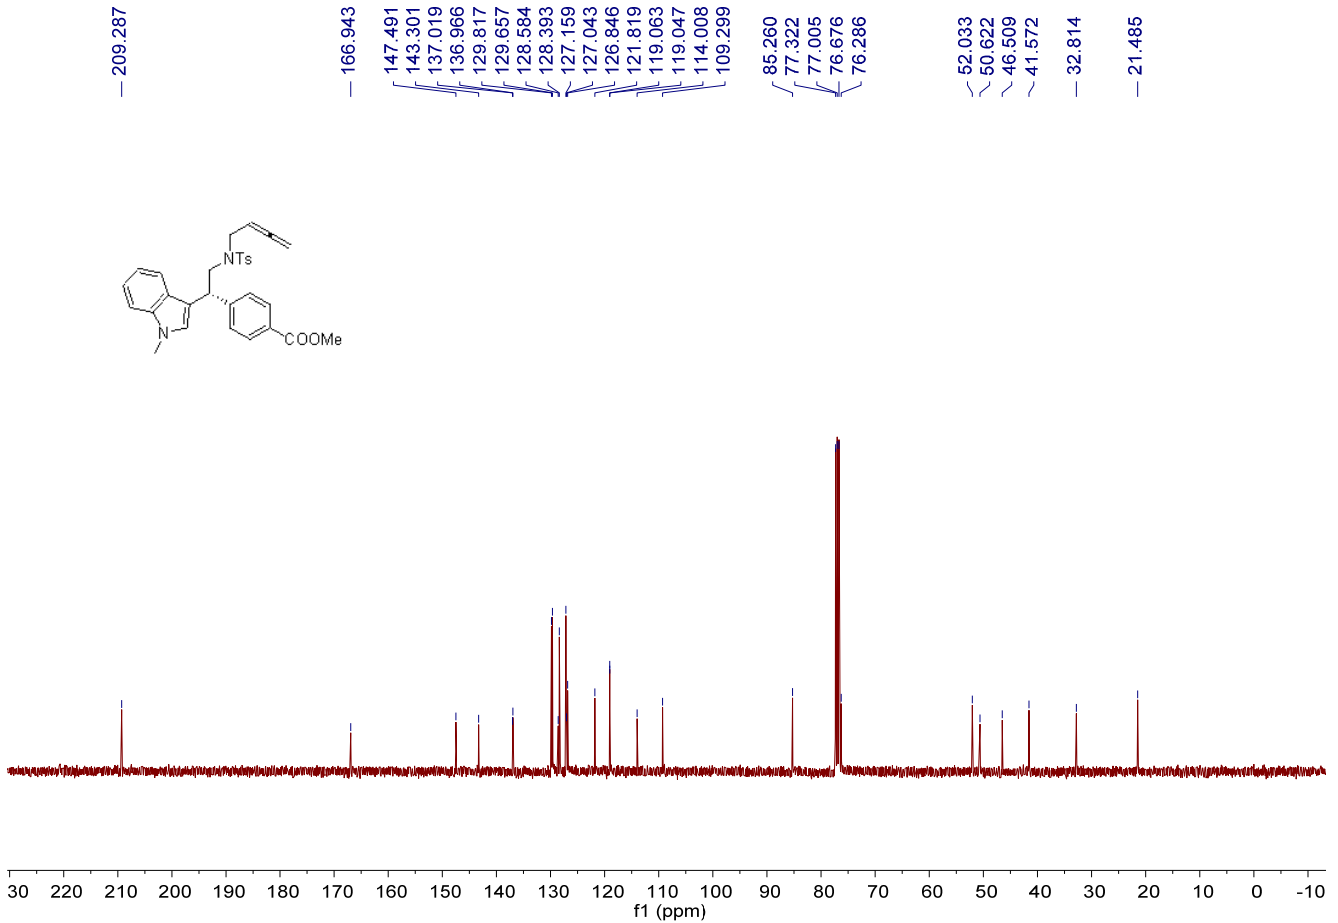

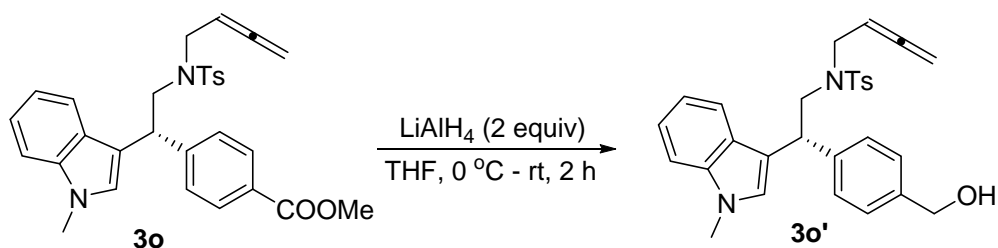

To an oven-dried reaction tube was added LiAlH<sub>4</sub> (3.3 mg, 0.088 mmol) and anhydrous THF (0.8 mL). The tube was cooled to 0 °C, and **3o** (22.8 mg, 0.044 mmol) was added into tube at 0 °C. The resulting mixture was stirred at room temperature for 2 h. The solution was filtered through a short column of silica gel eluting with ethyl acetate, and then the solution was concentrated under reduced pressure and the crude residue was purified via a silica gel flash column chromatography (PE/EA = 4/1) to give the corresponding product **3o'**.

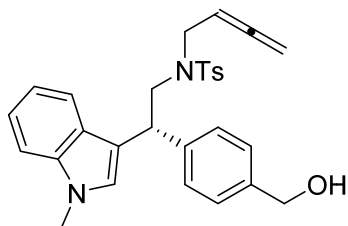

**(R)-N-(buta-2,3-dien-1-yl)-N-(2-(4-(hydroxymethyl)phenyl)-2-(1-methyl-1H-indol-3-yl)ethyl)-4-methylbenzenesulfonamide **1o'****

A white liquid, 86% yield (18.4 mg). <sup>1</sup>H NMR (CDCl<sub>3</sub>, TMS, 400 MHz) δ 2.39 (s, 3H), 3.56-3.63 (m, 1H), 3.63-3.69 (m, 1H), 3.74 (s, 3H), 3.82-3.89 (m, 1H), 3.99 (dd, *J* = 14.0, 7.2 Hz, 1H), 4.61-4.71 (m, 6H), 6.99-7.05 (m, 2H), 7.16-7.33 (m, 9H), 7.46 (d, *J* = 8.0 Hz, 1H), 7.61 (d, *J* = 8.0 Hz, 2H). <sup>13</sup>C NMR (CDCl<sub>3</sub>, 100 MHz, TMS) δ 21.5, 32.8, 41.1, 46.3, 50.8, 65.1, 76.2, 85.3, 109.2, 114.6, 118.9, 119.1, 121.6, 126.9, 127.2, 127.21, 127.24, 128.5, 129.6, 137.0, 137.1, 139.2, 141.6, 143.2, 209.3. MS (ESI) *m/z* (%): 504.23 (100) [M+NH<sub>4</sub>]<sup>+</sup>; HRMS (ESI) Calcd. For C<sub>29</sub>H<sub>34</sub>N<sub>3</sub>O<sub>3</sub>S<sup>+1</sup> [M+NH<sub>4</sub>]<sup>+</sup> requires 504.2315, found: 504.2308. Enantiomeric excess was determined by HPLC with a Chiralcel IC column [ $\lambda$  = 214 nm; eluent: Hexane/Isopropanol = 70/30; Flow rate: 0.70 mL/min; *t*<sub>minor</sub> = 23.41 min, *t*<sub>major</sub> = 26.74 min; ee% = 96%; [ $\alpha$ ]<sub>D</sub><sup>25</sup> = -81.5 (c 0.10, CH<sub>2</sub>Cl<sub>2</sub>)].

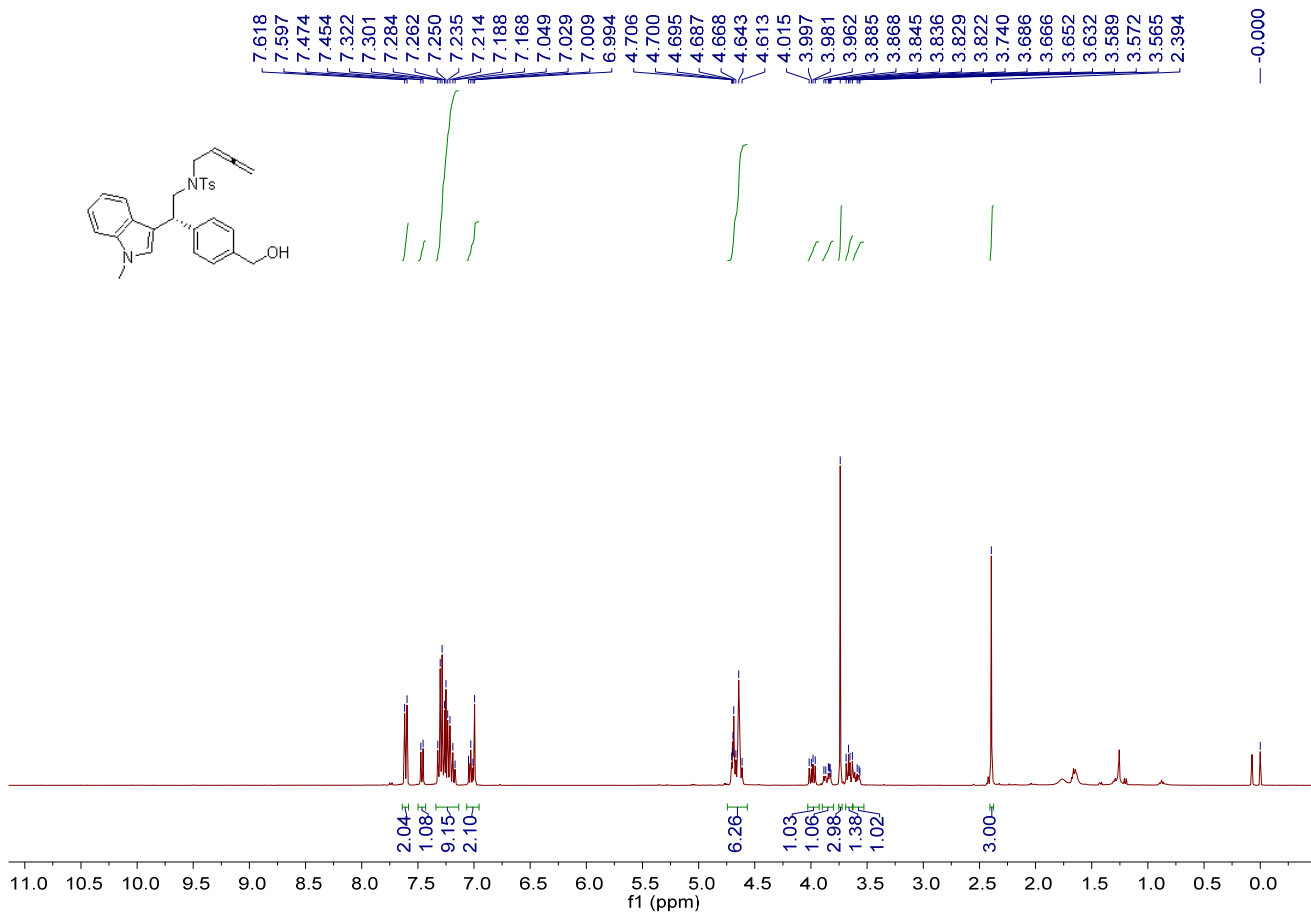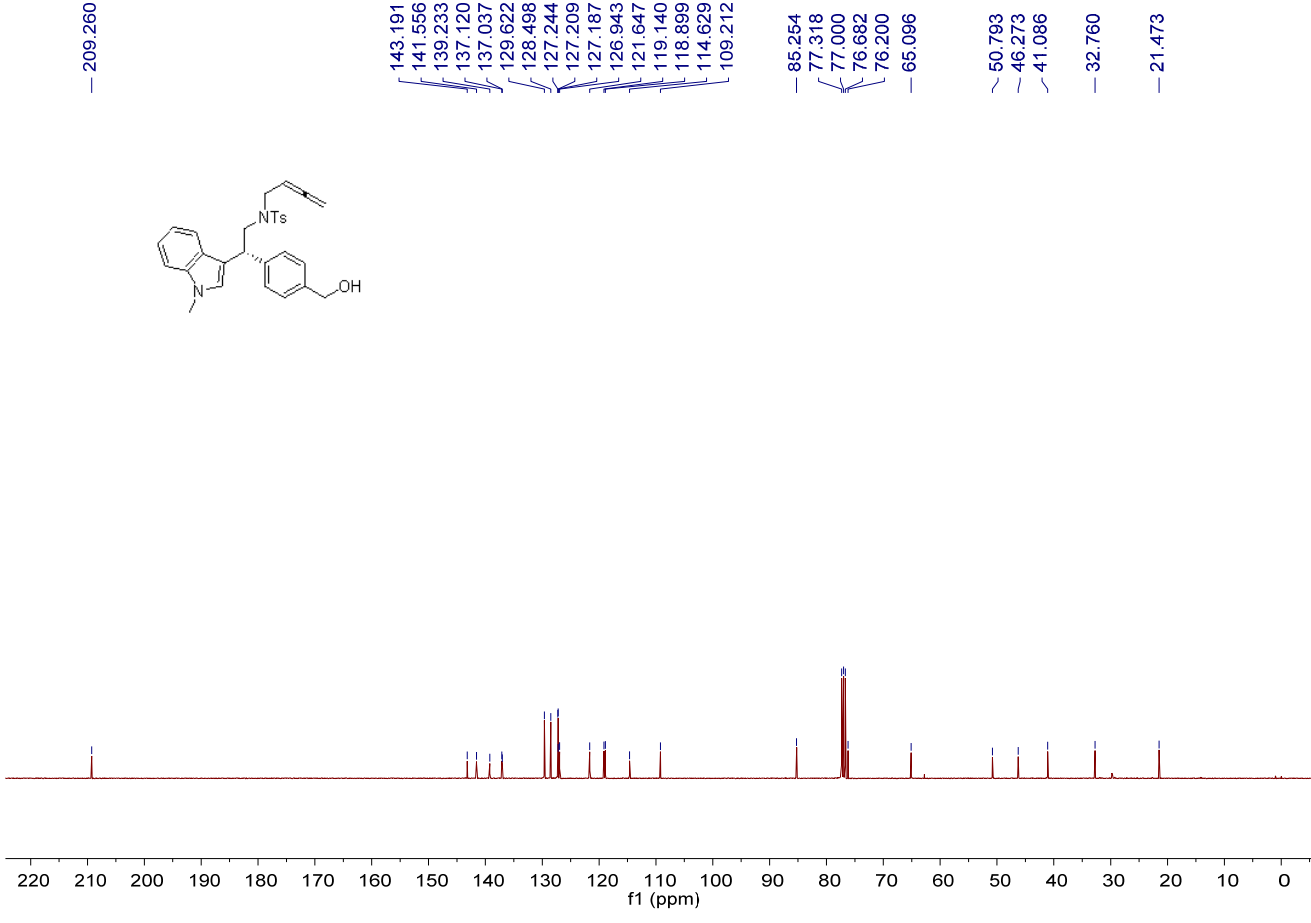



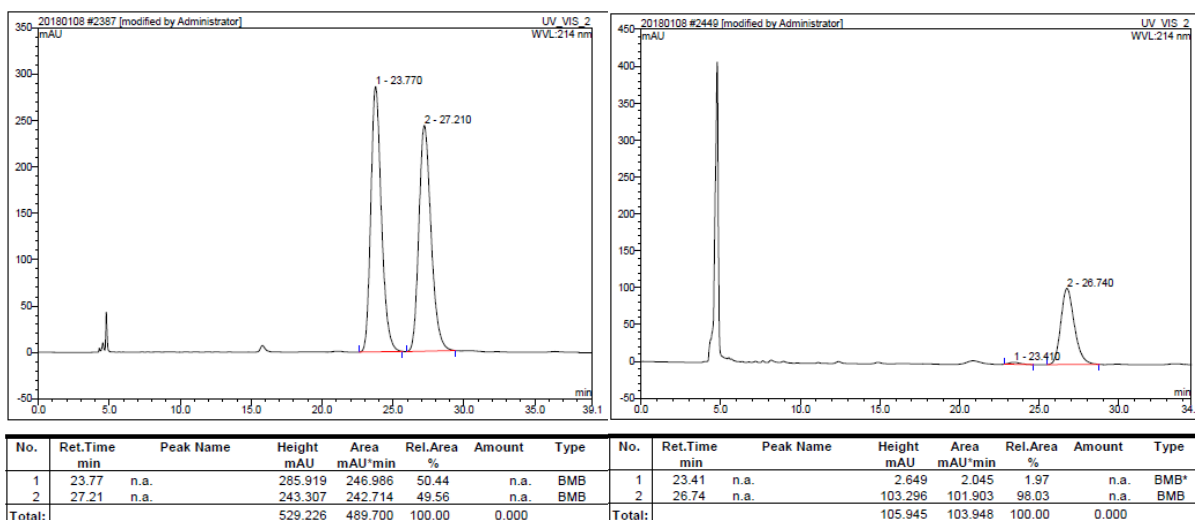

Translation: Chiralcel IC column [ $\lambda = 214$  nm; eluent: Hexane/Isopropanol = 70/30; Flow rate: 0.70 mL/min;  $t_{\text{minor}} = 23.41$  min,  $t_{\text{major}} = 26.74$  min; ee% = 96%]. (Note: In the 5 minute position, there is the peak of dichloromethane, due to that the sample was dissolved in dichloromethane for measuring).

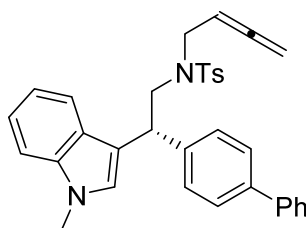

**(R)-N-(2-([1,1'-biphenyl]-4-yl)-2-(1-methyl-1H-indol-3-yl)ethyl)-N-(buta-2,3-dien-1-yl)-4-methylbenzenesulfonamide 1p**

A white solid, 44% yield (25.4 mg). M.p.: 43-46 °C.  $^1\text{H}$  NMR ( $\text{CDCl}_3$ , TMS, 400 MHz)  $\delta$  2.37 (s, 3H), 3.61-3.74 (m, 2H), 3.76 (s, 3H), 3.84-3.92 (m, 1H), 4.04 (dd,  $J = 13.6, 7.6$  Hz, 1H), 4.65-4.72 (m, 4H), 7.03-7.08 (m, 2H), 7.18-7.24 (m, 3H), 7.27-7.34 (m, 2H), 7.37-7.44 (m, 4H), 7.49-7.53 (m, 3H), 7.56 (d,  $J = 8.0$  Hz, 2H), 7.61 (d,  $J = 8.0$  Hz, 2H).  $^{13}\text{C}$  NMR ( $\text{CDCl}_3$ , 100 MHz, TMS)  $\delta$  21.5, 32.8, 41.0, 46.3, 50.7, 76.2, 85.3, 109.2, 114.6, 118.9, 119.2, 121.7, 126.9, 127.0, 127.10, 127.17, 127.19, 127.2, 128.7, 129.6, 137.0, 137.1, 139.4, 140.8, 141.2, 143.2, 209.3. IR ( $\text{CH}_2\text{Cl}_2$ )  $\nu$  3027, 2923, 1954, 1598, 1485, 1326, 1154, 1092, 936, 814, 738, 656  $\text{cm}^{-1}$ . MS (ESI)  $m/z$  (%): 533.22 (100)  $[\text{M}+\text{H}]^+$ ; HRMS (DART) Calcd. For  $\text{C}_{34}\text{H}_{33}\text{N}_2\text{O}_2\text{S}^+ [\text{M}+\text{H}]^+$  requires 533.2257, found: 533.2252. Enantiomeric excess was determined by HPLC with a Chiralcel IA column [ $\lambda = 214$  nm; eluent: Hexane/Isopropanol = 70/30; Flow rate: 0.70 mL/min;  $t_{\text{minor}} = 16.43$  min,  $t_{\text{major}} = 12.29$  min; ee% = 89%;  $[\alpha]_{\text{D}}^{25} = -12.7$  (c 0.10,  $\text{CH}_2\text{Cl}_2$ )].

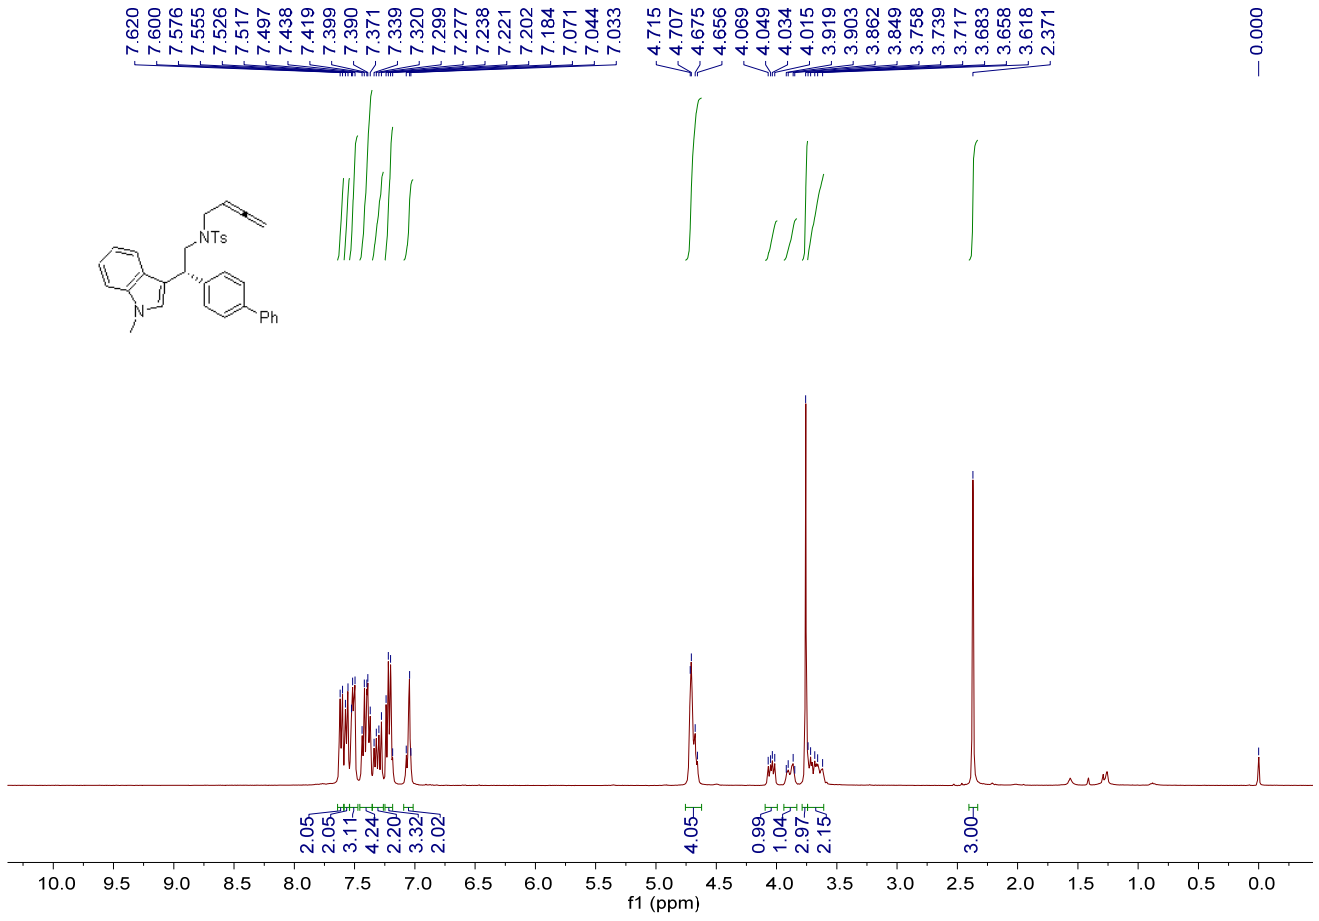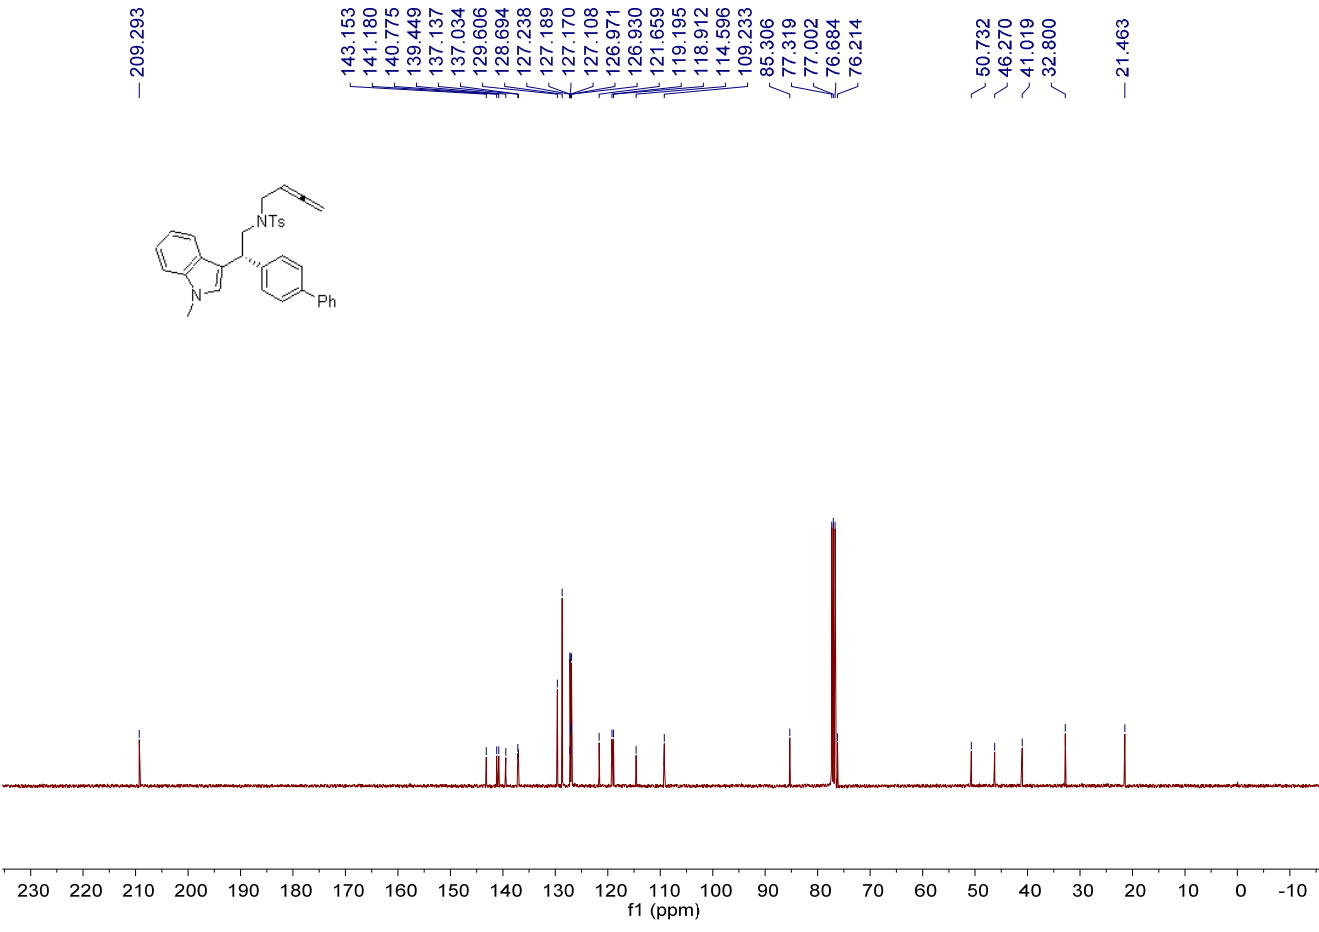

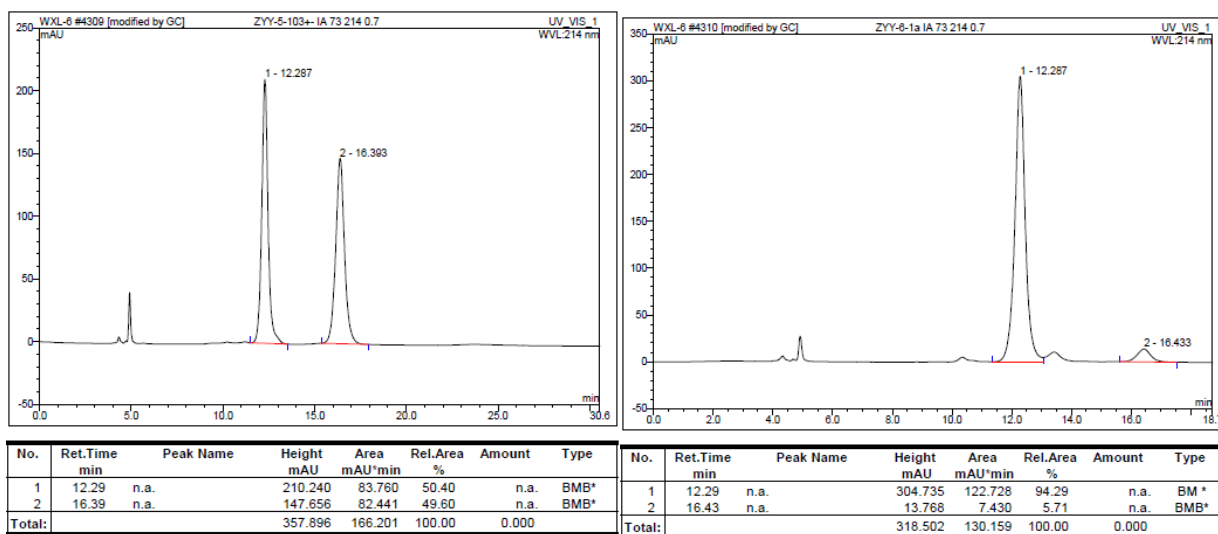

Translation: Chiralcel IA column [ $\lambda = 214$  nm; eluent: Hexane/Isopropanol = 70/30; Flow rate: 0.70 mL/min;  $t_{\text{minor}} = 16.43$  min,  $t_{\text{major}} = 12.29$  min; ee% = 89%]. (Note: In the 5 minute position, there is the peak of dichloromethane, due to that the sample was dissolved in dichloromethane for measuring).

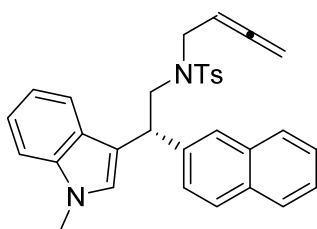

**(R)-N-(buta-2,3-dien-1-yl)-4-methyl-N-(2-(1-methyl-1H-indol-3-yl)-2-(naphthalen-2-yl)ethyl)benzenesulfonamide 1q**

A white solid, 50% yield (25.3 mg). M.p.: 80-83 °C.  $^1\text{H}$  NMR ( $\text{CDCl}_3$ , TMS, 400 MHz)  $\delta$  2.35 (s, 3H), 3.57-3.65 (m, 1H), 3.74 (s, 3H), 3.78 (dd,  $J = 13.6, 8.4$  Hz, 1H), 3.84-3.92 (m, 1H), 4.10 (dd,  $J = 13.6, 7.2$  Hz, 1H), 4.70-4.74 (m, 3H), 4.79 (t,  $J = 8.0$  Hz, 1H), 6.99-7.04 (m, 2H), 7.12 (d,  $J = 8.0$  Hz, 2H), 7.16-7.28 (m, 2H), 7.42-7.57 (m, 6H), 7.72-7.80 (m, 4H).  $^{13}\text{C}$  NMR ( $\text{CDCl}_3$ , 100 MHz, TMS)  $\delta$  21.4, 32.8, 41.5, 46.3, 50.7, 76.2, 85.4, 109.2, 114.7, 118.9, 119.2, 121.7, 125.5, 125.9, 126.6, 126.9, 127.0, 127.1, 127.3, 127.5, 127.7, 128.2, 129.5, 132.4, 133.4, 137.0, 137.2, 139.5, 143.1, 209.3. IR ( $\text{CH}_2\text{Cl}_2$ )  $\nu$  3051, 2923, 1952, 1598, 1328, 1155, 1092, 934, 813, 739, 657  $\text{cm}^{-1}$ . MS (ESI)  $m/z$  (%): 507.20 (100)  $[\text{M}+\text{H}]^+$ ; HRMS (DART) Calcd. For  $\text{C}_{32}\text{H}_{31}\text{N}_2\text{O}_2\text{S}^+$   $[\text{M}+\text{H}]^+$  requires 507.2101, found: 507.2095. Enantiomeric excess was determined by HPLC with a Chiralcel IG column [ $\lambda = 214$  nm; eluent: Hexane/Isopropanol = 50/50; Flow rate: 0.70 mL/min;  $t_{\text{minor}} = 21.60$  min,  $t_{\text{major}} = 18.32$  min; ee% = 80%;  $[\alpha]_{\text{D}}^{25} = -86.3$  (c 0.08,  $\text{CH}_2\text{Cl}_2$ ).

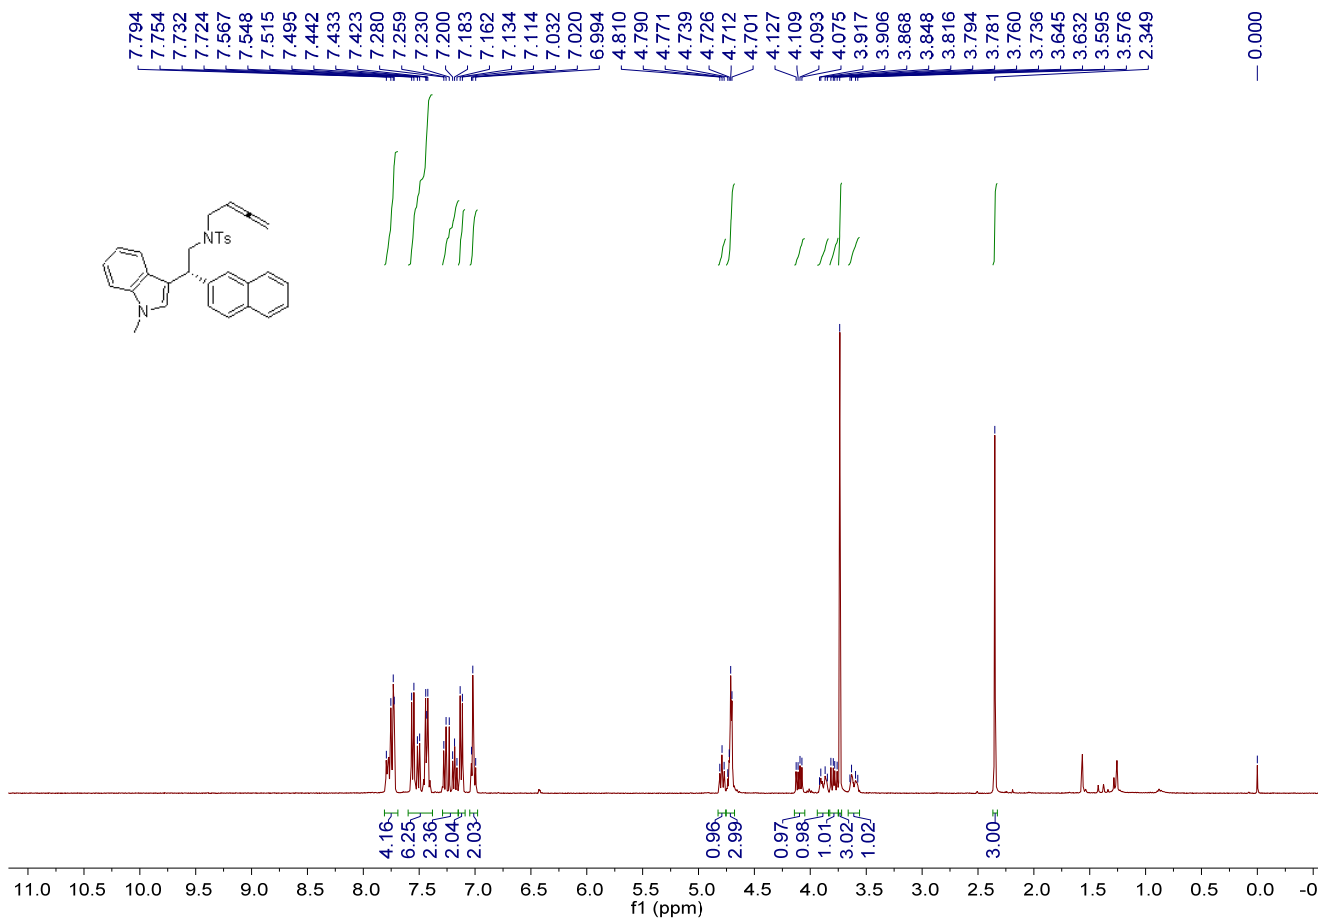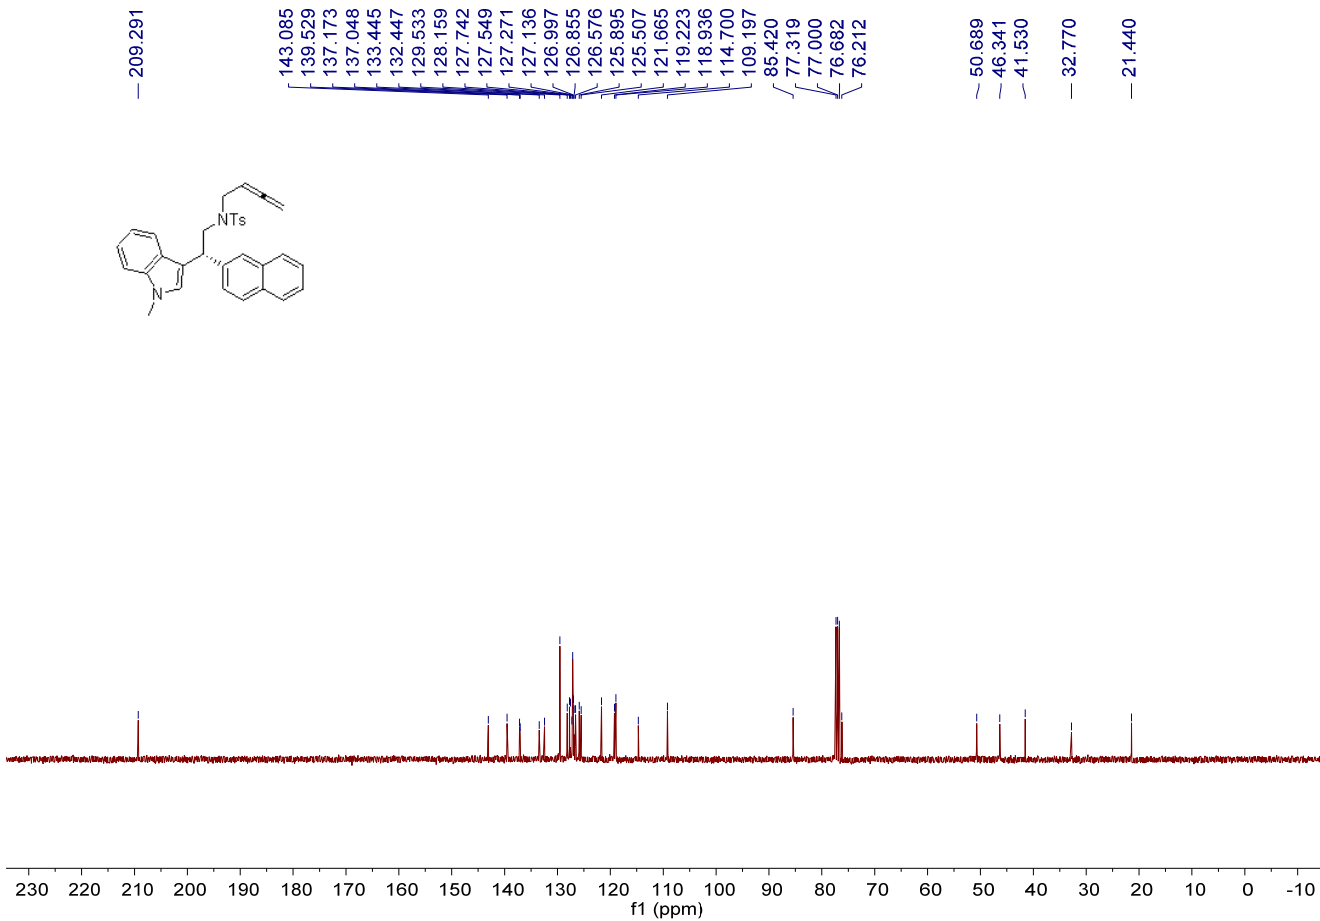

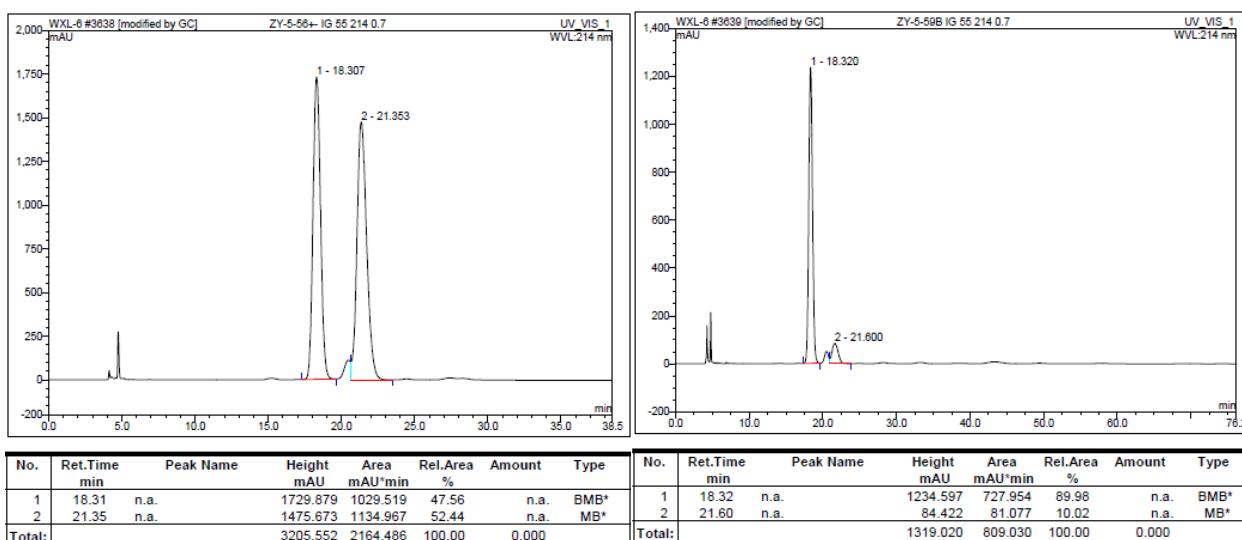

Translation: Chiralcel IG column [ $\lambda = 214$  nm; eluent: Hexane/Isopropanol = 50/50; Flow rate: 0.70 mL/min;  $t_{\text{minor}} = 21.60$  min,  $t_{\text{major}} = 18.32$  min; ee% = 80%]. (Note: In the 5 minute position, there is the peak of dichloromethane, due to that the sample was dissolved in dichloromethane for measuring).

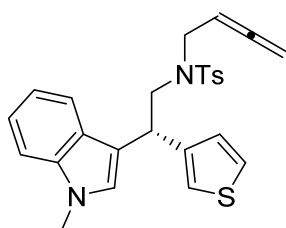

**(S)-N-(buta-2,3-dien-1-yl)-4-methyl-N-(2-(1-methyl-1H-indol-3-yl)-2-(thiophen-3-yl)ethyl)benzenesulfonamide 1r**

A white solid, 48% yield (22.2 mg). M.p.: 101-104 °C.  $^1\text{H}$  NMR ( $\text{CDCl}_3$ , TMS, 400 MHz)  $\delta$  2.39 (s, 3H), 3.56-3.64 (m, 1H), 3.71 (s, 3H), 3.74-3.82 (m, 2H), 3.88 (dd,  $J = 13.6, 6.8$  Hz, 1H), 4.64-4.68 (m, 3H), 4.74 (t,  $J = 8.0$  Hz, 1H), 6.87 (s, 1H), 7.03-7.13 (m, 3H), 7.18-7.29 (m, 5H), 7.54 (d,  $J = 8.0$  Hz, 1H), 7.61 (d,  $J = 8.0$  Hz, 2H).  $^{13}\text{C}$  NMR ( $\text{CDCl}_3$ , 100 MHz, TMS)  $\delta$  21.5, 32.7, 37.2, 46.6, 51.0, 76.1, 85.4, 109.3, 114.8, 118.9, 119.2, 121.55, 121.63, 125.4, 126.9, 127.0, 127.2, 127.8, 129.6, 137.0, 137.2, 142.7, 143.1, 209.2. IR ( $\text{CH}_2\text{Cl}_2$ )  $\nu$  2919, 2858, 1952, 1455, 1337, 1155, 1098, 837, 747, 667  $\text{cm}^{-1}$ . MS (ESI)  $m/z$  (%): 463.15 (100)  $[\text{M}+\text{H}]^+$ ; HRMS (ESI) Calcd. For  $\text{C}_{26}\text{H}_{27}\text{N}_2\text{O}_2\text{S}_2^{+1}$   $[\text{M}+\text{H}]^+$  requires 463.1508, found: 463.1507. Enantiomeric excess was determined by HPLC with a Chiralcel IE3 column [ $\lambda = 214$  nm; eluent: Hexane/Isopropanol = 85/15; Flow rate: 0.70 mL/min;  $t_{\text{minor}} = 35.81$  min,  $t_{\text{major}} = 39.73$  min; ee% = 95%;  $[\alpha]_{\text{D}}^{25} = -115.3$  (c 0.12,  $\text{CH}_2\text{Cl}_2$ )].

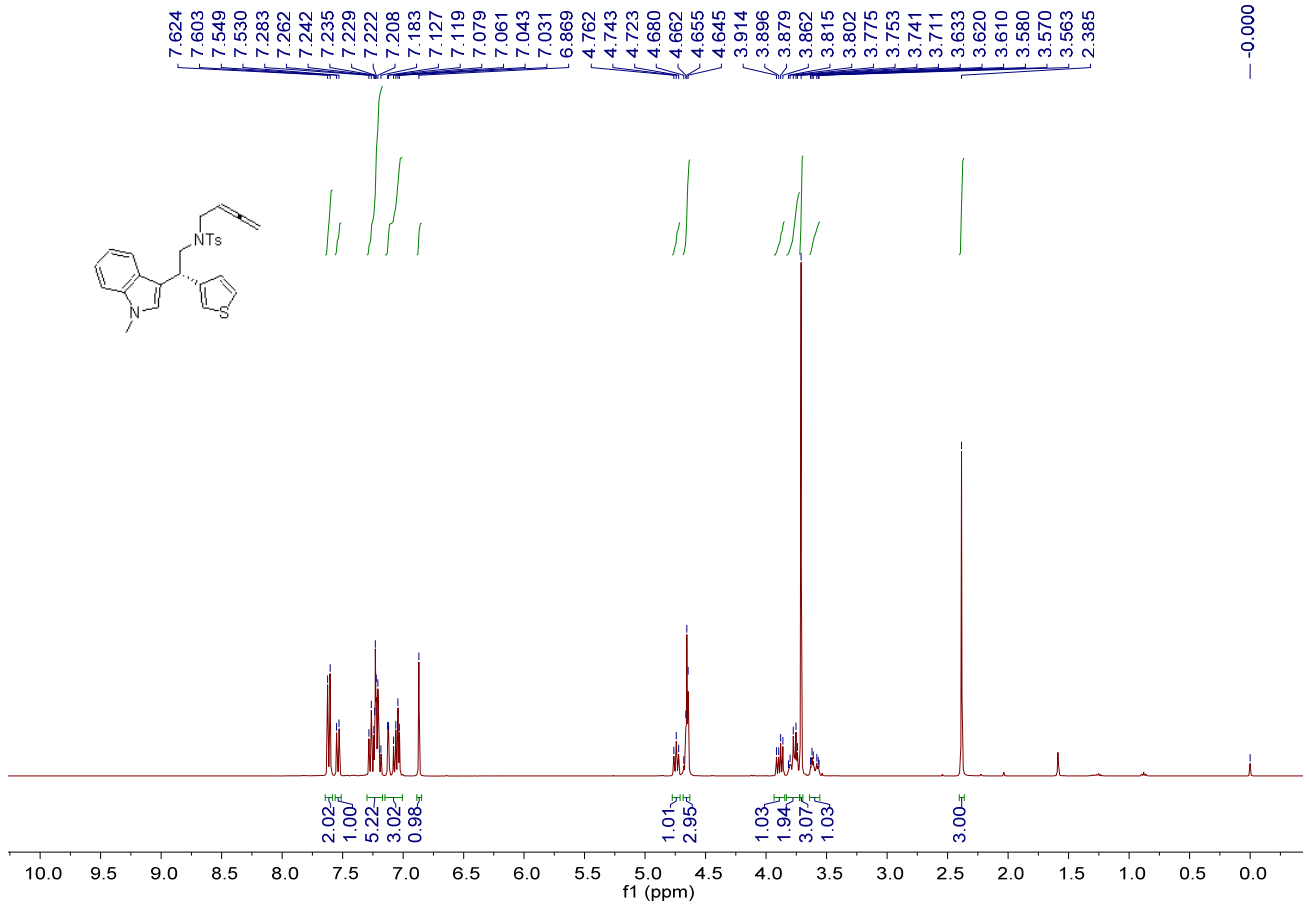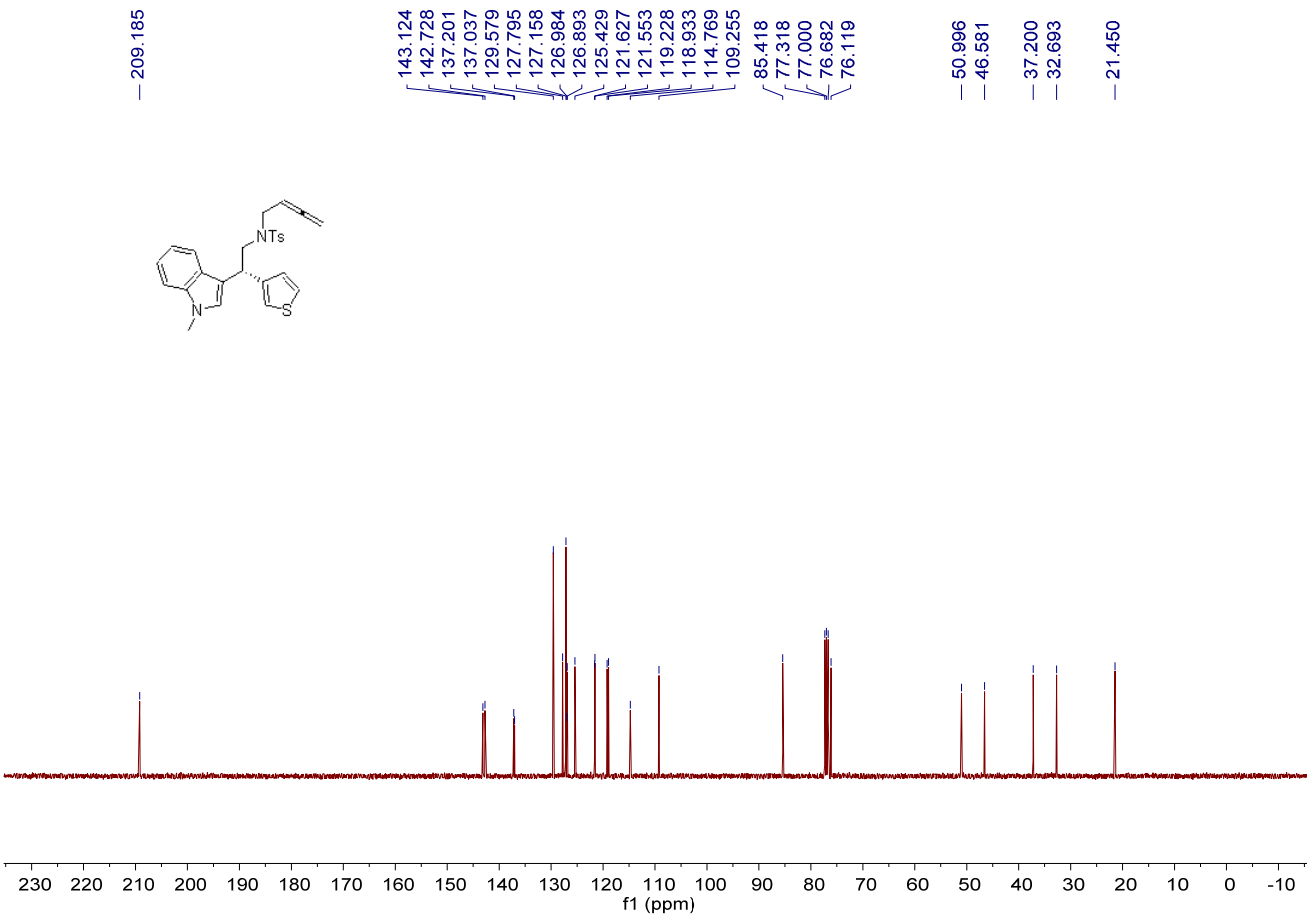

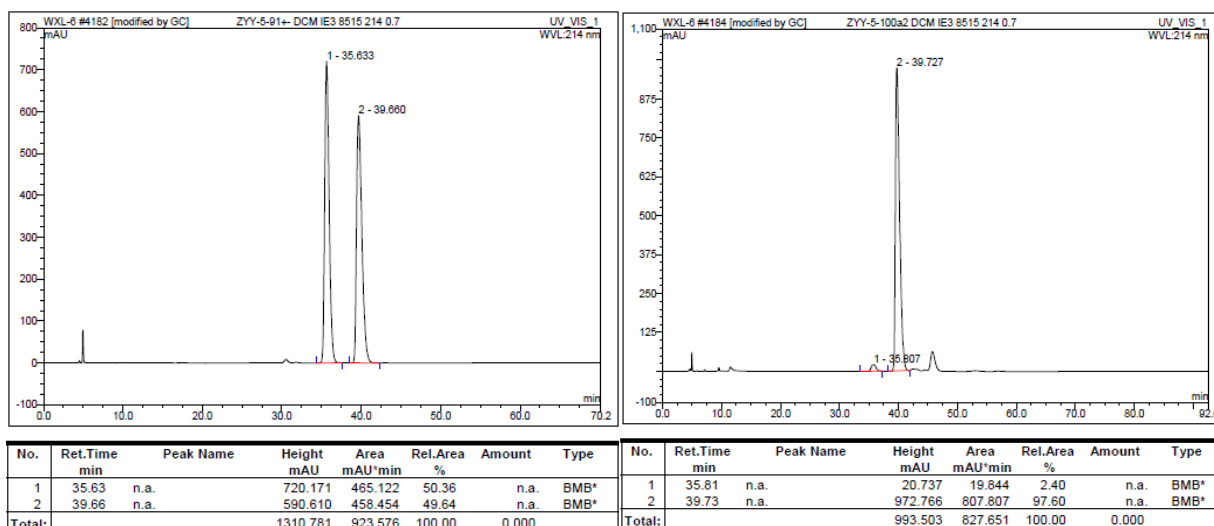

Translation: Chiralcel IE3 column [ $\lambda = 214$  nm; eluent: Hexane/Isopropanol = 85/15; Flow rate: 0.70 mL/min;  $t_{\text{minor}} = 35.81$  min,  $t_{\text{major}} = 39.73$  min; ee% = 95%]. (Note: In the 5 minute position, there is the peak of dichloromethane, due to that the sample was dissolved in dichloromethane for measuring).

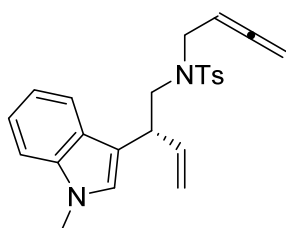

**(R)-N-(buta-2,3-dien-1-yl)-4-methyl-N-(2-(1-methyl-1H-indol-3-yl)but-3-en-1-yl)benzenesulfonamide 1s**

A white liquid, 48% yield (19.4 mg).  $^1\text{H}$  NMR ( $\text{CDCl}_3$ , TMS, 400 MHz)  $\delta$  2.40 (s, 3H), 3.55-3.58 (m, 2H), 3.75 (s, 3H), 3.77-4.05 (m, 3H), 4.62-4.79 (m, 3H), 5.12-5.21 (m, 2H), 6.03-6.13 (m, 1H), 6.92 (s, 1H), 7.07-7.12 (m, 1H), 7.20-7.31 (m, 4H), 7.60 (d,  $J = 8.0$  Hz, 1H), 7.66 (d,  $J = 8.0$  Hz, 2H).  $^{13}\text{C}$  NMR ( $\text{CDCl}_3$ , 100 MHz, TMS)  $\delta$  21.5, 32.7, 40.1, 46.7, 50.6, 76.1, 85.5, 109.3, 114.0, 116.2, 118.9, 119.3, 121.7, 126.3, 126.9, 127.2, 129.6, 137.0, 137.4, 138.7, 143.1, 209.3. IR ( $\text{CH}_2\text{Cl}_2$ )  $\nu$  2924, 1954, 1597, 1328, 1155, 1090, 848, 739, 657  $\text{cm}^{-1}$ . MS (ESI)  $m/z$  (%): 407.17 (100)  $[\text{M}+\text{H}]^+$ ; HRMS (ESI) Calcd. For  $\text{C}_{24}\text{H}_{27}\text{N}_2\text{O}_2\text{S}^+$   $[\text{M}+\text{H}]^+$  requires 407.1788, found: 407.1782. Enantiomeric excess was determined by HPLC with a Chiralcel IB column [ $\lambda = 214$  nm; eluent: Hexane/Isopropanol = 96/4; Flow rate: 0.70 mL/min;  $t_{\text{minor}} = 21.41$  min,  $t_{\text{major}} = 19.79$  min; ee% = 84%;  $[\alpha]_{\text{D}}^{25} = -23.0$  (c 0.10,  $\text{CH}_2\text{Cl}_2$ )].

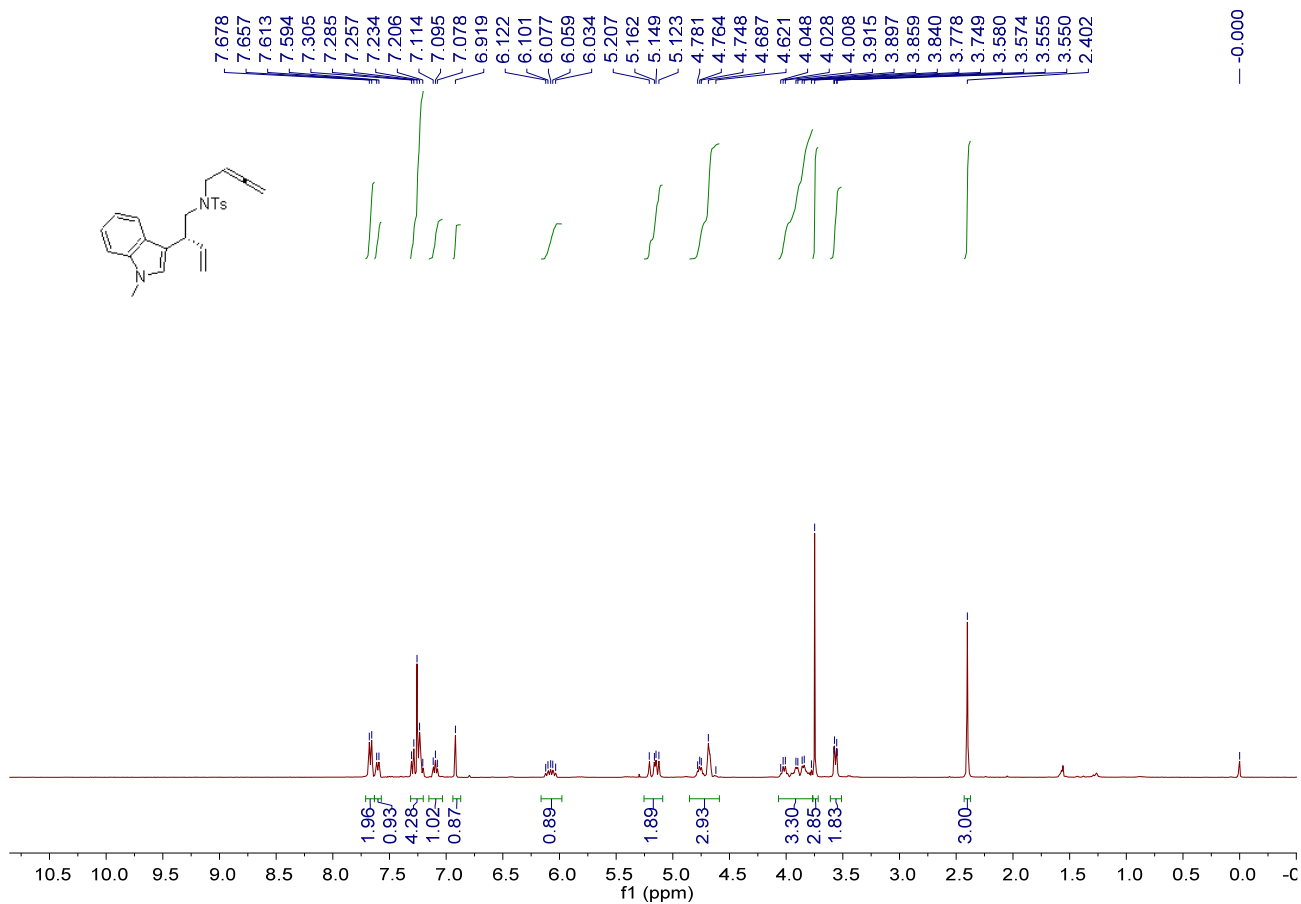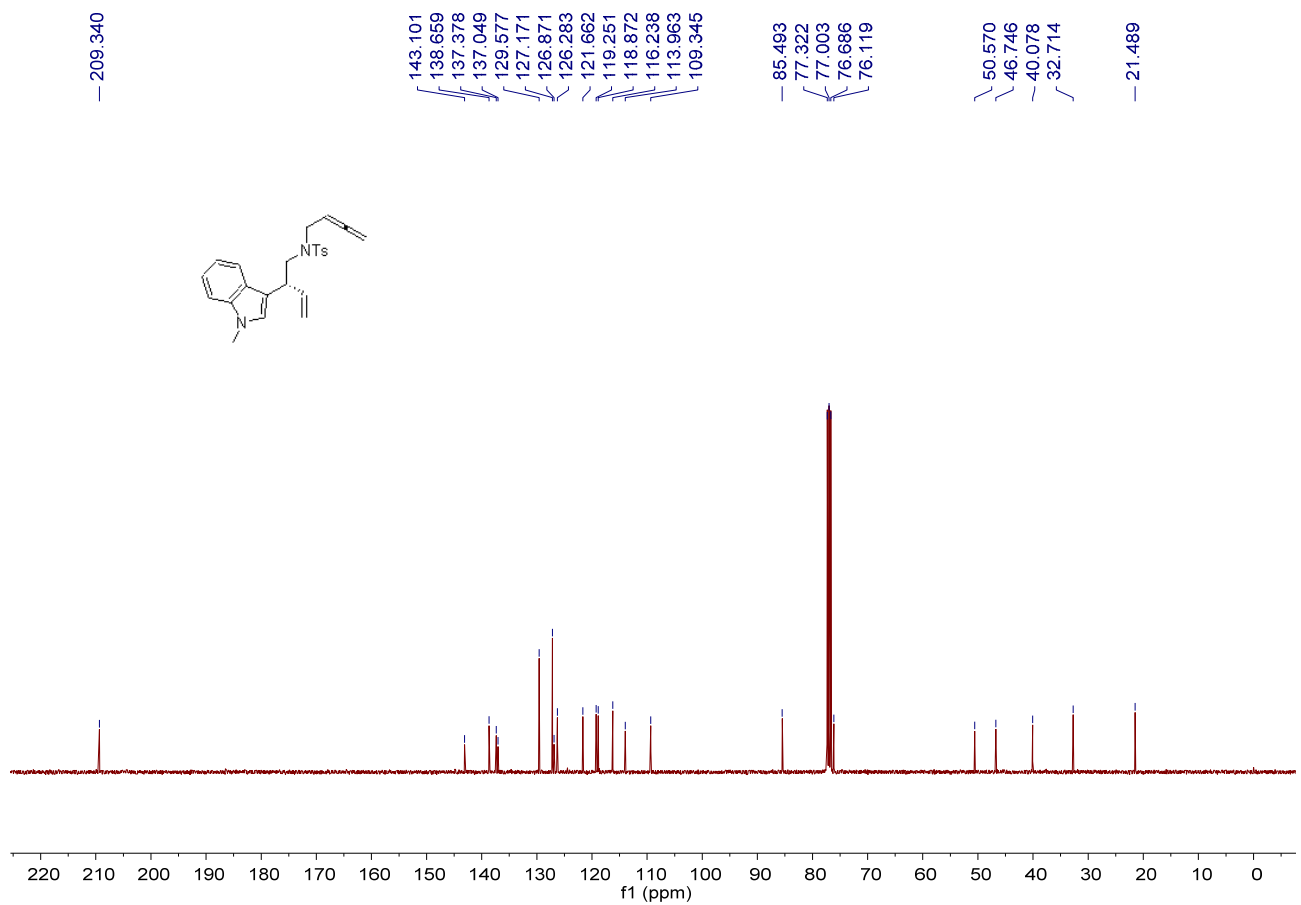



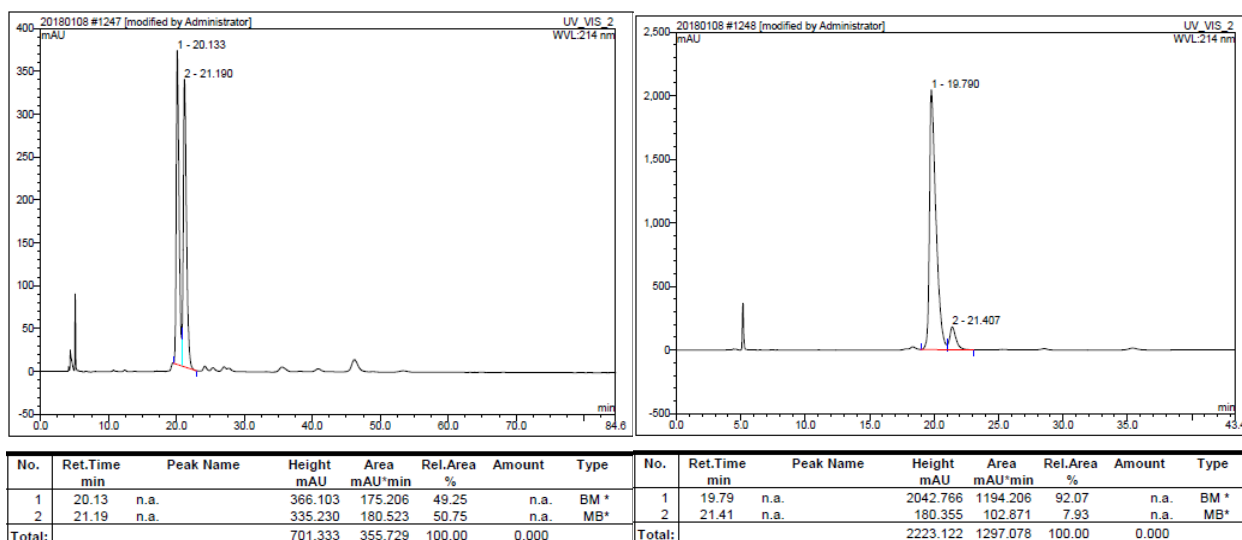

Translation: Chiralcel IB column [ $\lambda = 214$  nm; eluent: Hexane/Isopropanol = 96/4; Flow rate: 0.70 mL/min;  $t_{\text{minor}} = 21.41$  min,  $t_{\text{major}} = 19.79$  min; ee% = 84%]. (Note: In the 5 minute position, there is the peak of dichloromethane, due to that the sample was dissolved in dichloromethane for measuring).

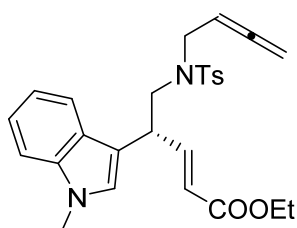

**(*R,E*)-ethyl 5-(*N*-(buta-2,3-dien-1-yl)-4-methylphenylsulfonamido)-4-(1-methyl-1*H*-indol-3-yl)pent-2-enoate **1t****

A white liquid, 44% yield (20.9 mg).  $^1\text{H}$  NMR ( $\text{CDCl}_3$ , TMS, 400 MHz)  $\delta$  1.27 (t,  $J = 7.2$  Hz, 3H), 2.40 (s, 3H), 3.55-3.67 (m, 2H), 3.69-3.89 (m, 5H), 4.13-4.24 (m, 3H), 4.66-4.80 (m, 3H), 5.89 (d,  $J = 15.6$  Hz, 1H), 6.94 (s, 1H), 7.08-7.22 (m, 2H), 7.24-7.32 (m, 4H), 7.55 (d,  $J = 8.0$  Hz, 1H), 7.66 (d,  $J = 8.0$  Hz, 2H).  $^{13}\text{C}$  NMR ( $\text{CDCl}_3$ , 100 MHz, TMS)  $\delta$  14.2, 21.5, 32.8, 39.0, 47.3, 50.2, 60.3, 76.3, 85.4, 109.5, 111.9, 119.0, 119.2, 121.9, 122.4, 126.6, 127.2, 129.7, 136.9, 137.0, 143.3, 148.0, 166.4, 209.4. IR ( $\text{CH}_2\text{Cl}_2$ )  $\nu$  2924, 1954, 1712, 1597, 1470, 1328, 1155, 1090, 981, 853, 741, 657  $\text{cm}^{-1}$ . MS (ESI)  $m/z$  (%): 496.22 (100)  $[\text{M}+\text{NH}_4]^+$ ; HRMS (ESI) Calcd. For  $\text{C}_{27}\text{H}_{34}\text{N}_3\text{O}_4\text{S}^+$   $[\text{M}+\text{NH}_4]^+$  requires 496.2265, found: 496.2254. Enantiomeric excess was determined by HPLC with a Chiralcel IA column [ $\lambda = 214$  nm; eluent: Hexane/Isopropanol = 90/10; Flow rate: 0.70 mL/min;  $t_{\text{minor}} = 27.91$  min,  $t_{\text{major}} = 24.09$  min; ee% = 91%;  $[\alpha]_{\text{D}}^{25} = 3.5$  (c 0.08,  $\text{CH}_2\text{Cl}_2$ )].

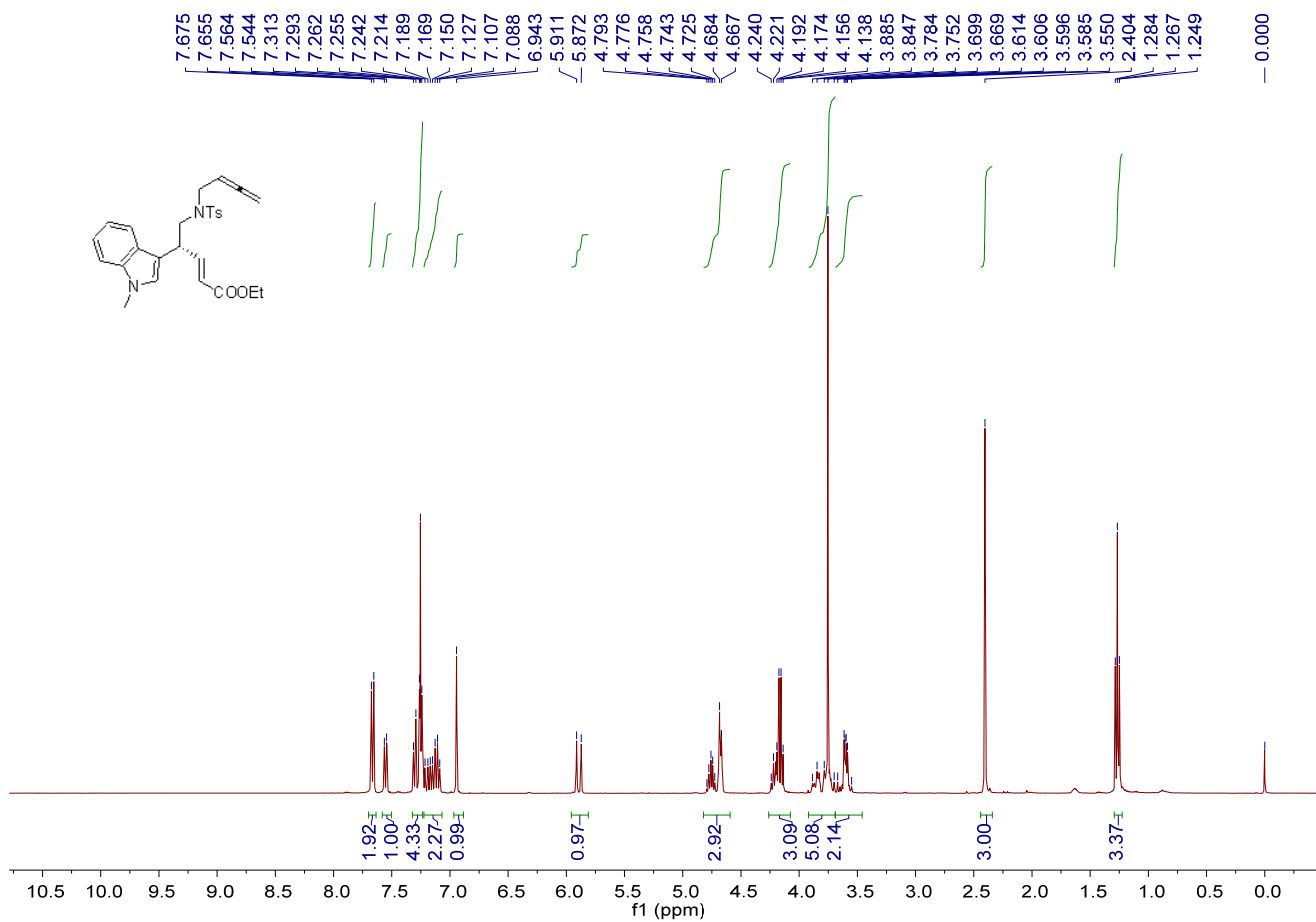

209.369

166.393

147.991

143.333

137.013

136.861

129.650

127.213

126.640

122.436

121.872

119.188

119.012

111.914

109.451

85.422

77.318

77.000

76.683

76.261

60.296

50.248

47.287

39.008

32.769

21.483

14.217

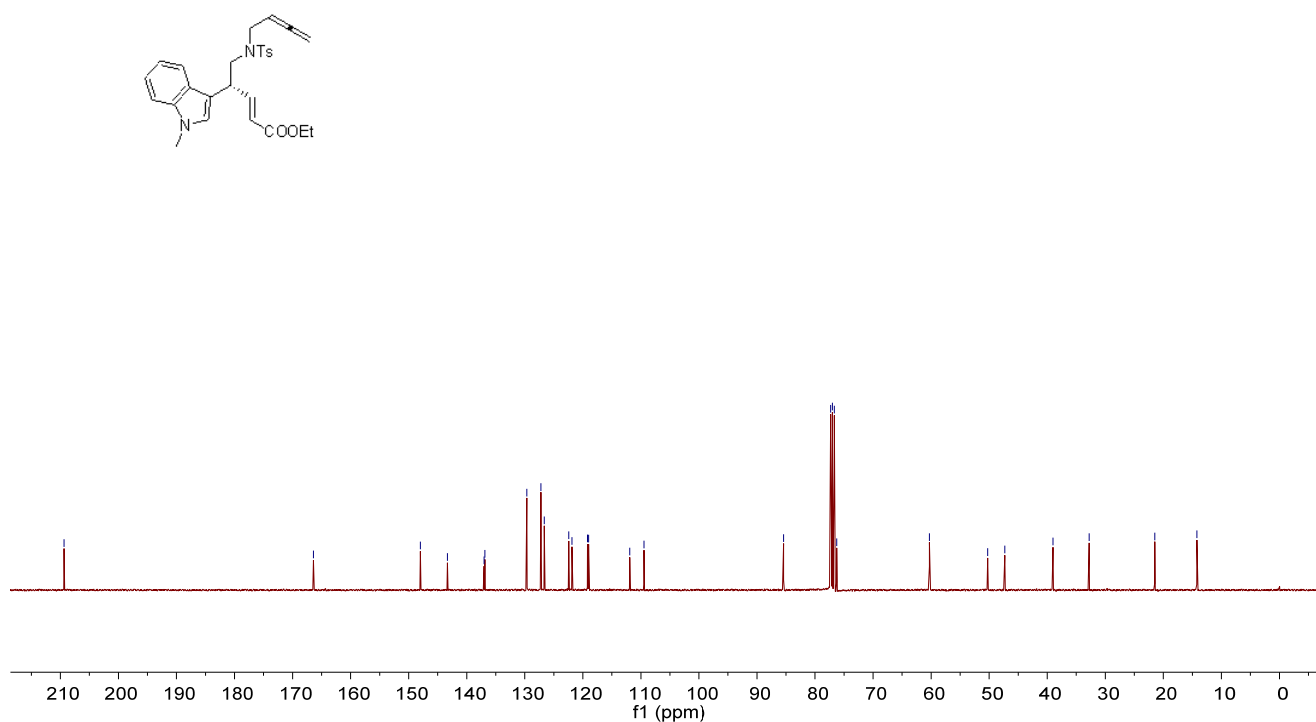

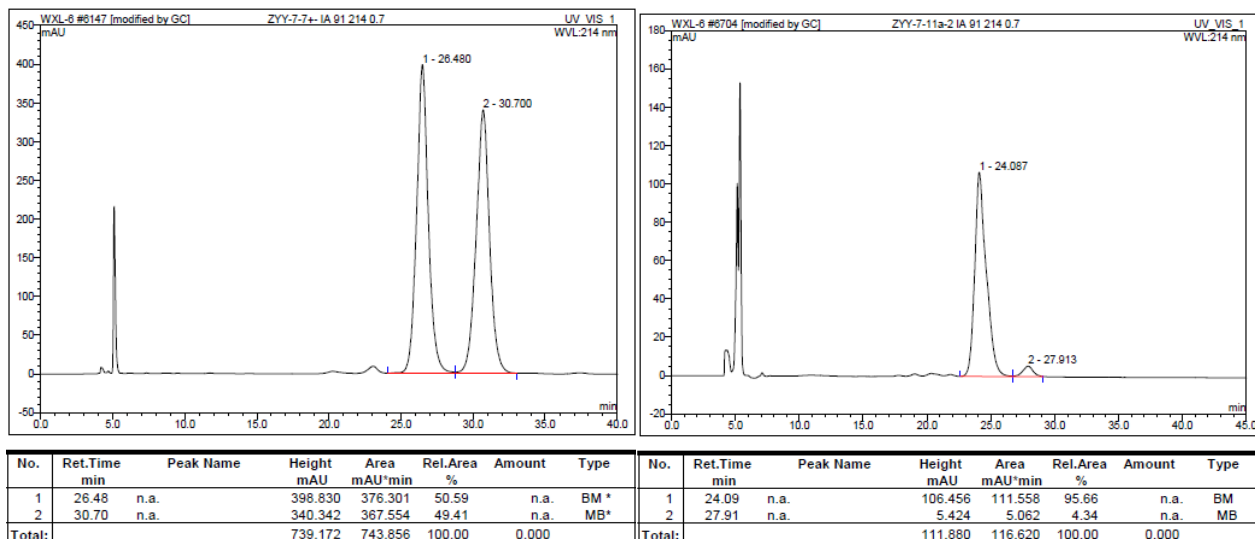

Translation: Chiralcel IA column [ $\lambda = 214$  nm; eluent: Hexane/Isopropanol = 90/10; Flow rate: 0.70 mL/min;  $t_{\text{minor}} = 27.91$  min,  $t_{\text{major}} = 24.09$  min; ee% = 91%]. (Note: In the 5 minute position, there is the peak of dichloromethane, due to that the sample was dissolved in dichloromethane for measuring).

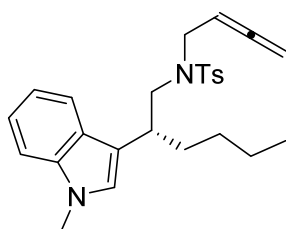

**(R)-N-(buta-2,3-dien-1-yl)-4-methyl-N-(2-(1-methyl-1H-indol-3-yl)hexyl)benzenesulfonamide 1u**

A white liquid, 43% yield (18.8 mg).  $^1\text{H}$  NMR ( $\text{CDCl}_3$ , TMS, 400 MHz)  $\delta$  0.82 (t,  $J = 7.2$  Hz, 3H), 1.16-1.30 (m, 4H), 1.62-1.72 (m, 1H), 1.85-1.94 (m, 1H), 2.38 (s, 3H), 3.19-3.27 (m, 1H), 3.31 (dd,  $J = 13.2, 6.8$  Hz, 1H), 3.52 (dd,  $J = 13.6, 8.8$  Hz, 1H), 3.74 (s, 3H), 3.74-3.78 (m, 1H), 3.81-3.89 (m, 1H), 4.64-4.68 (m, 2H), 4.73-4.80 (m, 1H), 6.84 (s, 1H), 7.04-7.09 (m, 1H), 7.18-7.22 (m, 3H), 7.28 (d,  $J = 8.0$  Hz, 1H), 7.56 (d,  $J = 8.0$  Hz, 1H), 7.61 (d,  $J = 8.0$  Hz, 2H).  $^{13}\text{C}$  NMR ( $\text{CDCl}_3$ , 100 MHz, TMS)  $\delta$  1.0, 14.0, 21.4, 22.8, 29.7, 32.3, 32.7, 35.3, 46.9, 52.2, 76.0, 85.7, 109.3, 115.4, 118.6, 119.1, 121.4, 126.3, 127.1, 127.4, 129.5, 137.0, 137.3, 143.0, 209.2. IR ( $\text{CH}_2\text{Cl}_2$ )  $\nu$  3288, 2954, 2921, 2851, 1735, 1597, 1494, 1349, 1185, 1161, 1092, 929, 898, 750, 658  $\text{cm}^{-1}$ . MS (ESI)  $m/z$  (%): 437.22 (100)  $[\text{M}+\text{H}]^+$ ; HRMS (DART) Calcd. For  $\text{C}_{26}\text{H}_{33}\text{N}_2\text{O}_2\text{S}^+$   $[\text{M}+\text{H}]^+$  requires 437.2257, found: 437.2256. Enantiomeric excess was determined by HPLC with a Chiralcel AD column [ $\lambda = 254$  nm; eluent: Hexane/Isopropanol = 100/1; Flow rate: 0.30 mL/min;  $t_{\text{minor}} = 93.49$  min,  $t_{\text{major}} = 99.29$  min; ee% = 94%;  $[\alpha]_{\text{D}}^{25} = 9.1$  (c 0.15,  $\text{CH}_2\text{Cl}_2$ )].

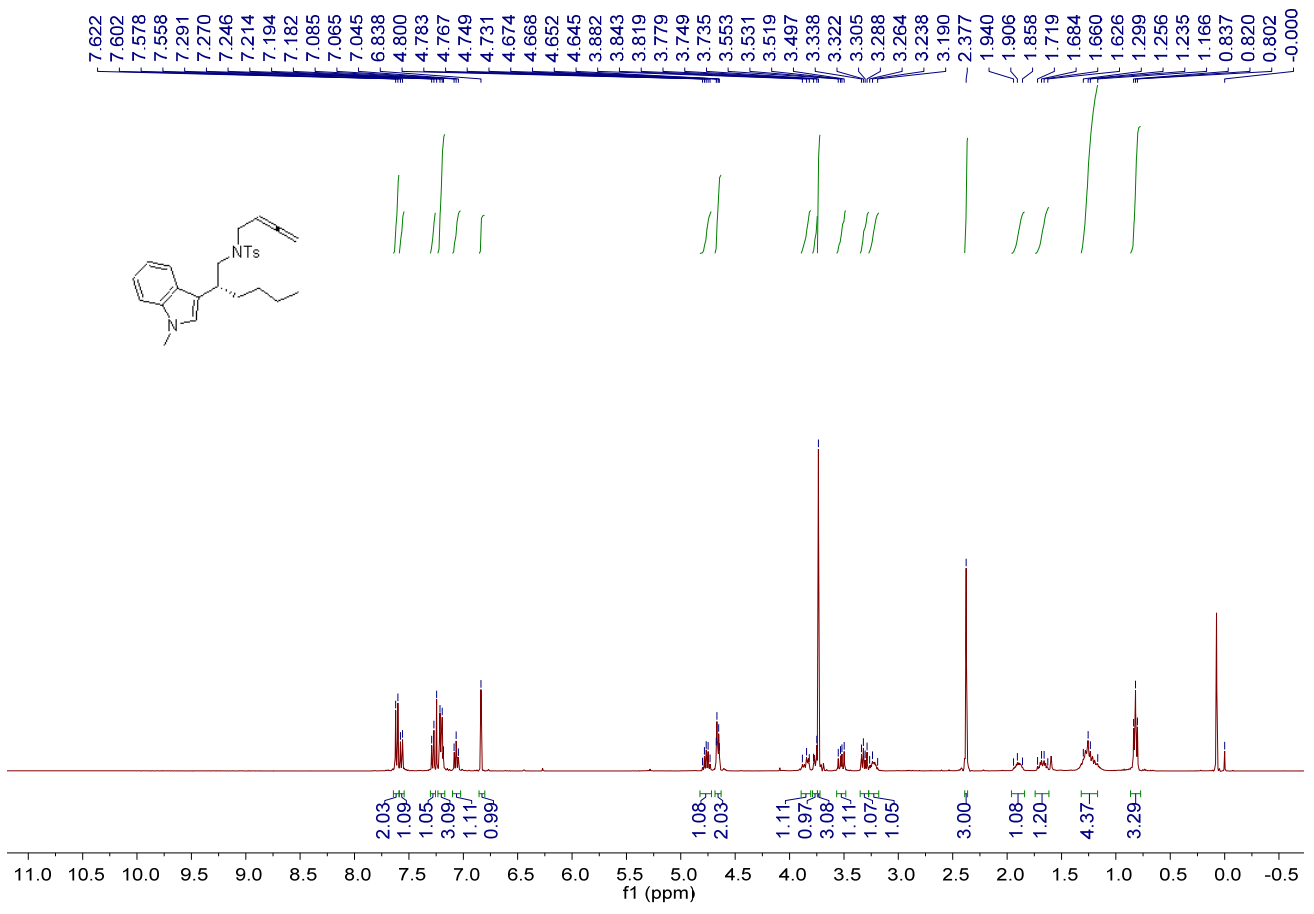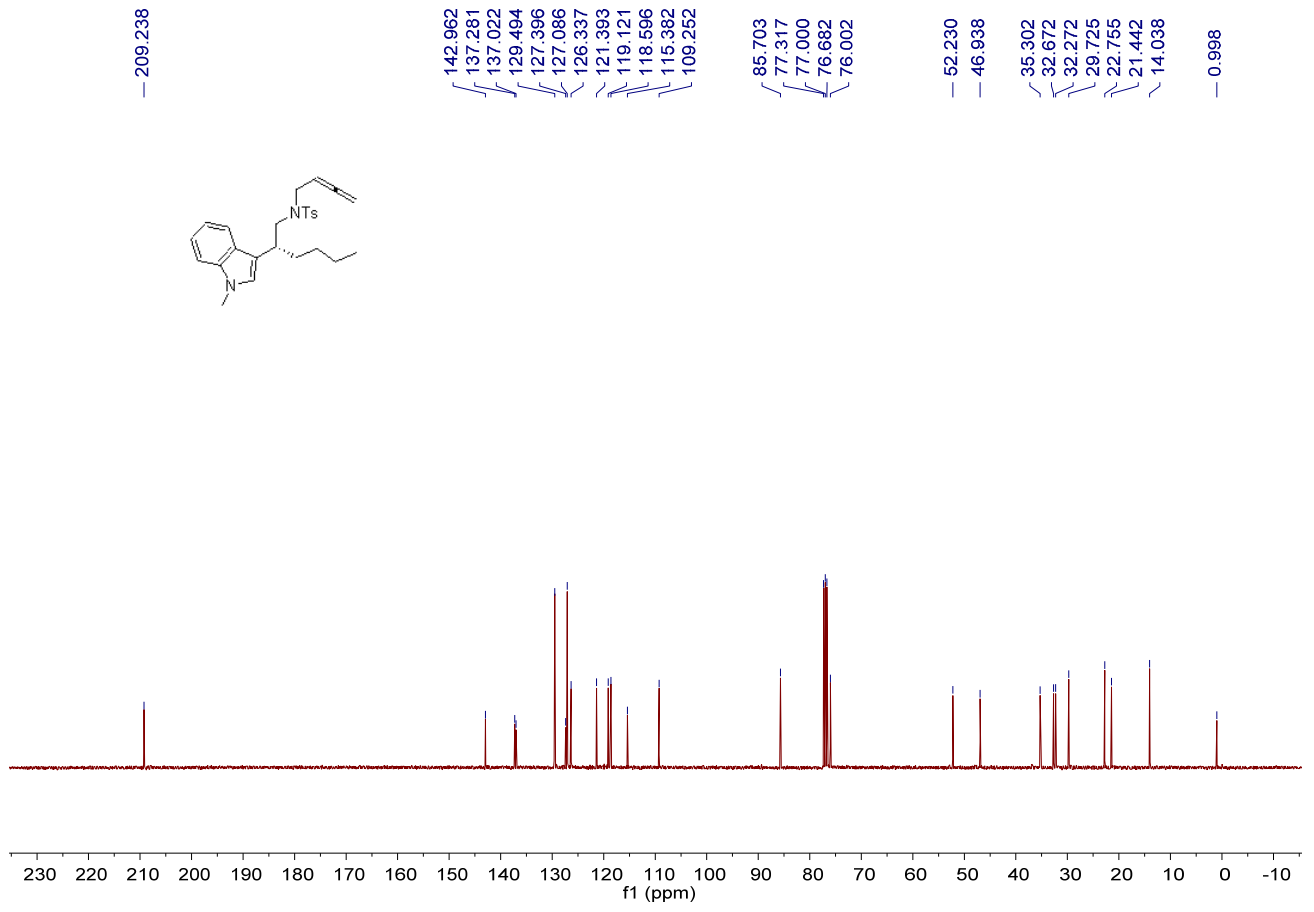

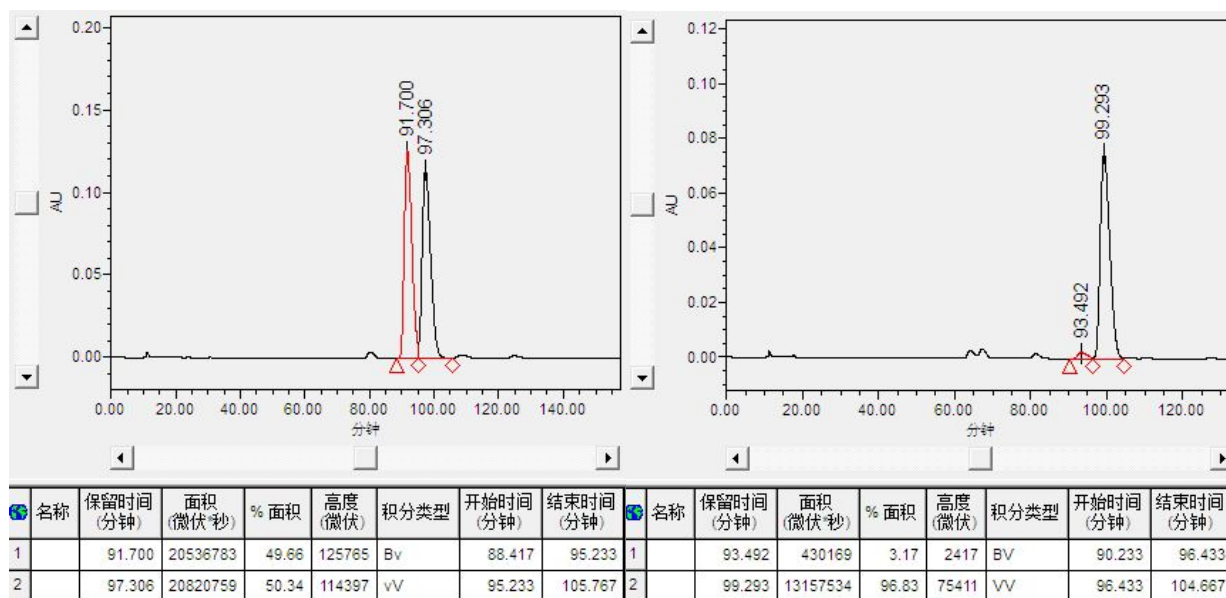

Translation: Chiralcel AD column [ $\lambda = 254$  nm; eluent: Hexane/Isopropanol = 100/1; Flow rate: 0.30 mL/min;  $t_{\text{minor}} = 93.49$  min,  $t_{\text{major}} = 99.29$  min; ee% = 94%].

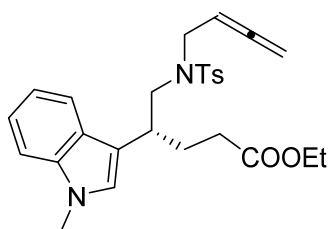

**(R)-ethyl 5-(N-(buta-2,3-dien-1-yl)-4-methylphenylsulfonamido)-4-(1-methyl-1H-indol-3-yl)**

**Pentanoate 1v**

A white liquid, 43% yield (20.5 mg).  $^1\text{H}$  NMR ( $\text{CDCl}_3$ , TMS, 400 MHz)  $\delta$  1.87 (t,  $J = 7.2$  Hz, 3H), 1.91-2.01 (m, 1H), 2.16-2.33 (m, 3H), 2.38 (s, 3H), 3.28-3.37 (m, 2H), 3.52-3.60 (m, 1H), 3.74 (s, 3H), 3.76-3.81 (m, 1H), 3.86-3.93 (m, 1H), 4.03 (q,  $J = 7.2$  Hz, 2H), 4.64-4.79 (m, 3H), 6.87 (s, 1H), 7.05-7.10 (m, 1H), 7.19-7.30 (m, 4H), 7.56 (d,  $J = 8.0$  Hz, 1H), 7.62 (d,  $J = 8.0$  Hz, 2H).  $^{13}\text{C}$  NMR ( $\text{CDCl}_3$ , 100 MHz, TMS)  $\delta$  14.1, 21.4, 27.6, 32.2, 32.7, 34.8, 46.9, 51.8, 60.1, 76.1, 85.4, 109.3, 113.9, 118.8, 119.1, 121.6, 126.6, 127.1, 127.2, 129.5, 137.08, 137.11, 143.1, 173.5, 209.3. IR ( $\text{CH}_2\text{Cl}_2$ )  $\nu$  2929, 1954, 1727, 1327, 1155, 1090, 971, 852, 739, 658  $\text{cm}^{-1}$ . MS (ESI)  $m/z$  (%): 498.24 (100)  $[\text{M}+\text{NH}_4]^+$ ; HRMS (ESI) Calcd. For  $\text{C}_{27}\text{H}_{36}\text{N}_3\text{O}_4\text{S}^+$   $[\text{M}+\text{NH}_4]^+$  requires 498.2421, found: 498.2410. Enantiomeric excess was determined by HPLC with a Chiralcel IE3 column [ $\lambda = 214$  nm; eluent: Hexane/Isopropanol = 80/20; Flow rate: 0.70 mL/min;  $t_{\text{minor}} = 51.95$  min,  $t_{\text{major}} = 48.65$  min; ee% = 99%;  $[\alpha]_{\text{D}}^{25} = 10.0$  (c 0.08,  $\text{CH}_2\text{Cl}_2$ )].

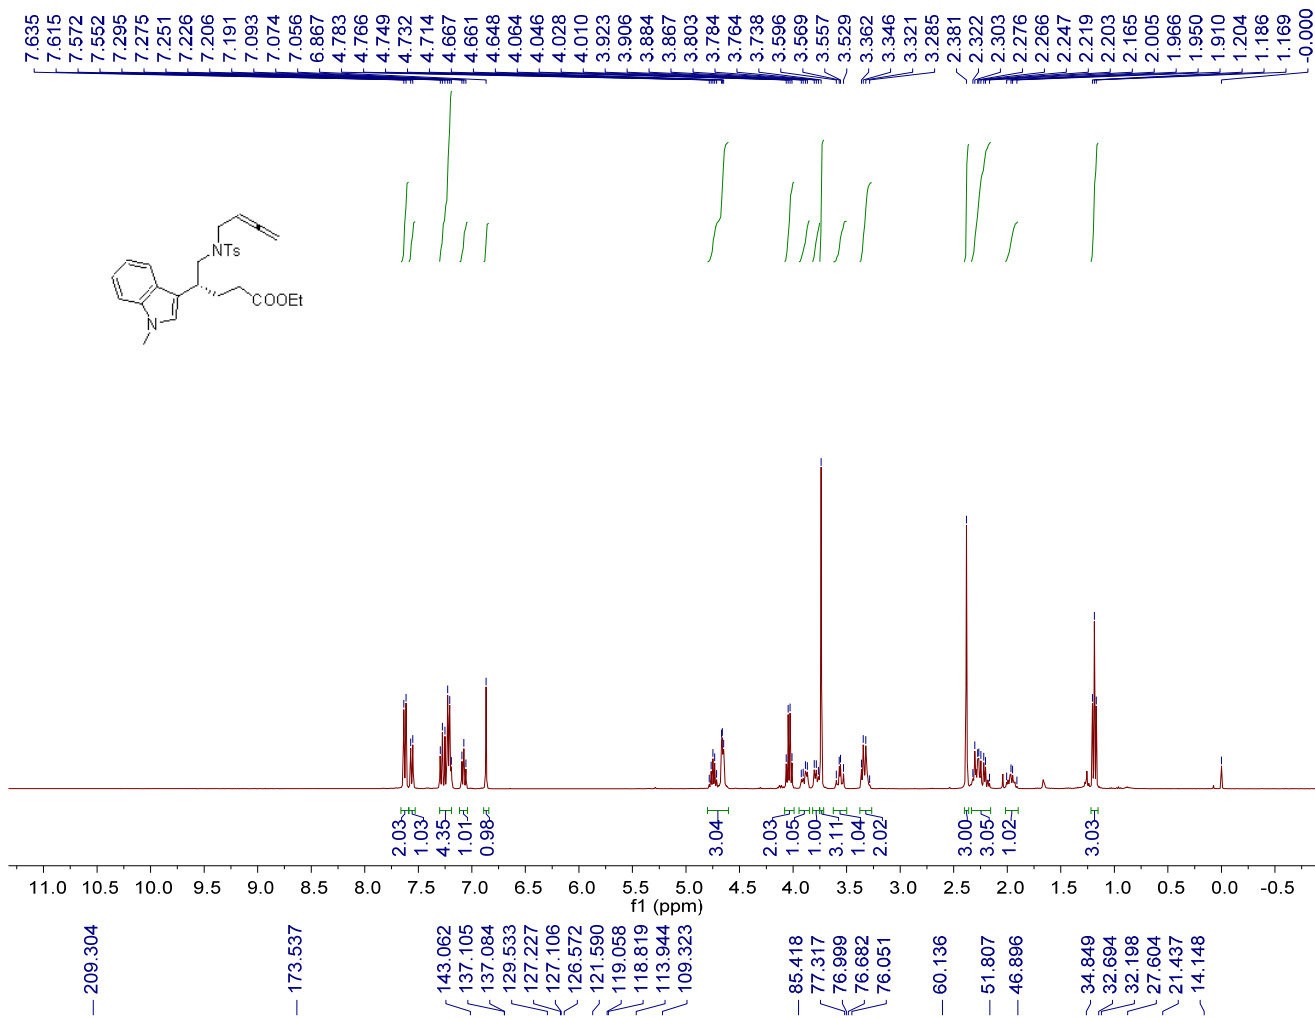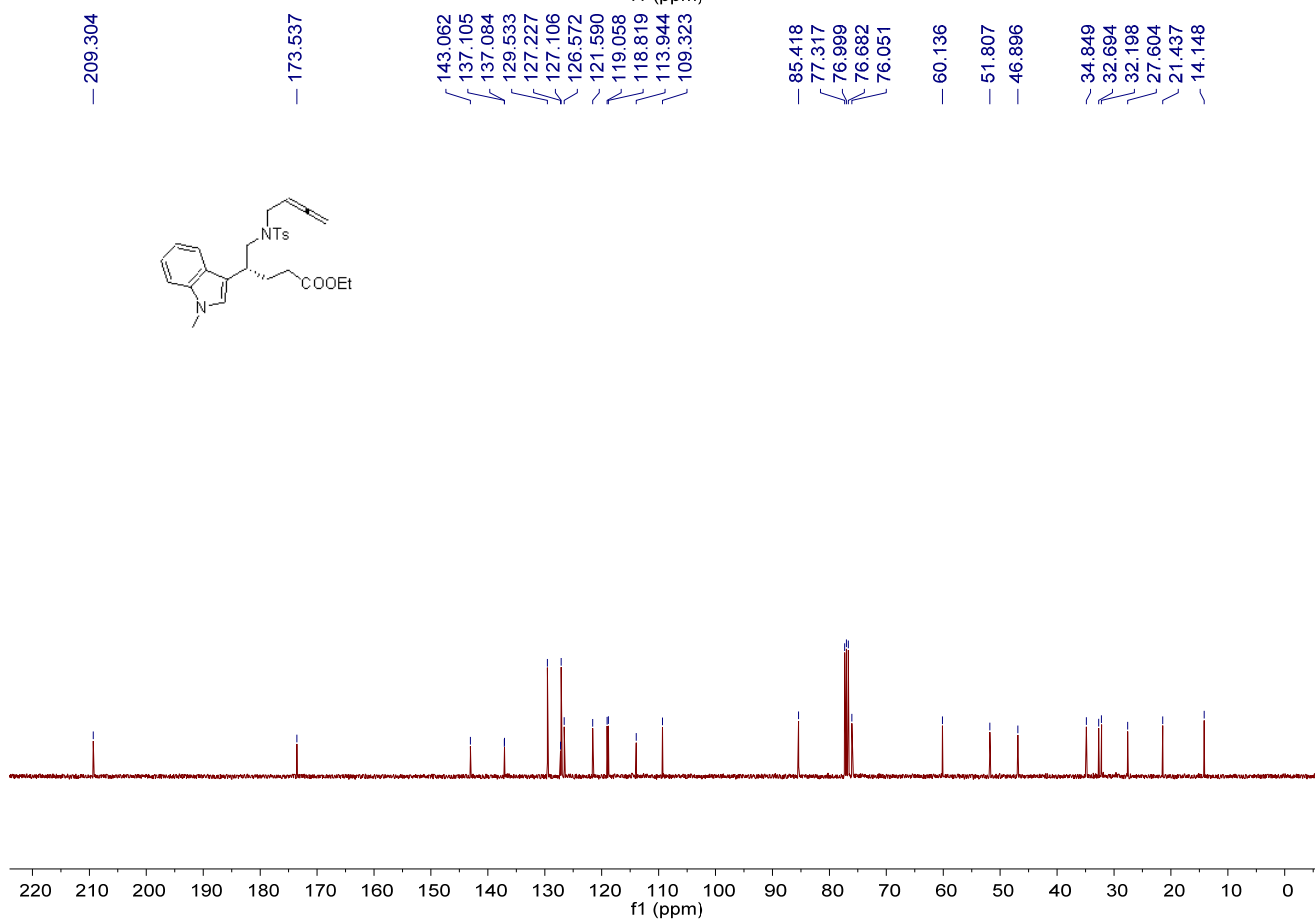

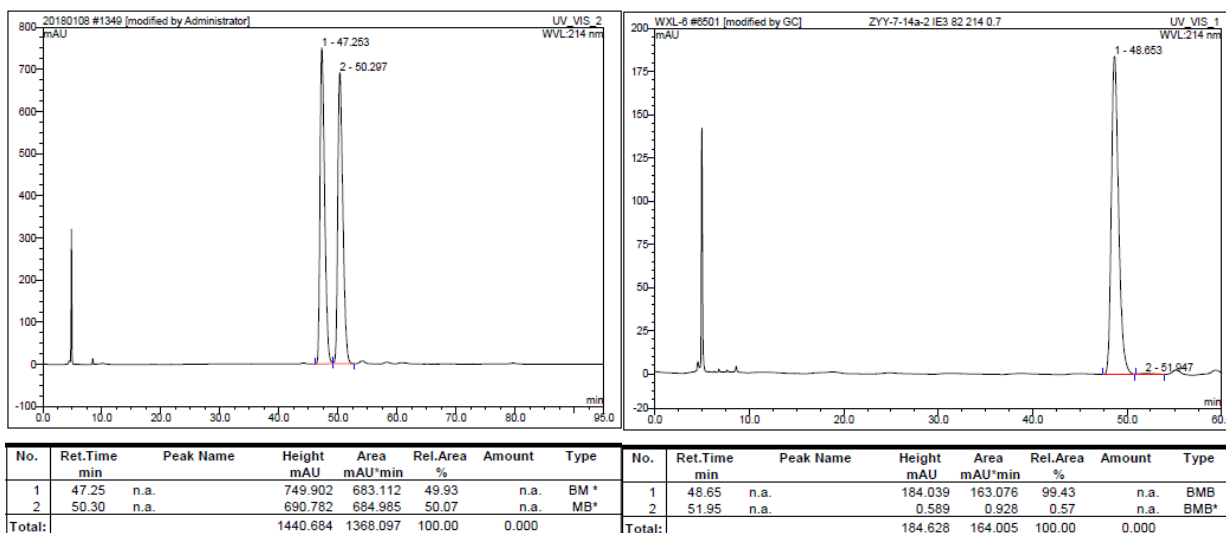

Translation: Chiralcel IE3 column [ $\lambda = 214$  nm; eluent: Hexane/Isopropanol = 80/20; Flow rate: 0.70 mL/min;  $t_{\text{minor}} = 51.95$  min,  $t_{\text{major}} = 48.65$  min; ee% = 99%]. (Note: In the 5-minute position, there is the peak of dichloromethane, due to that the sample was dissolved in dichloromethane for measuring).

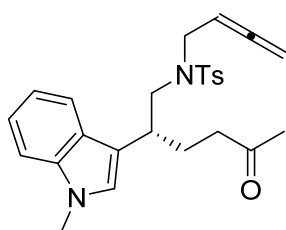

**(R)-N-(buta-2,3-dien-1-yl)-4-methyl-N-(2-(1-methyl-1H-indol-3-yl)-5-oxohexyl)benzenesulfonamide 1w**

A white liquid, 42% yield (18.8 mg).  $^1\text{H}$  NMR ( $\text{CDCl}_3$ , TMS, 400 MHz)  $\delta$  1.25-1.30 (m, 1H), 1.83-1.93 (m, 1H), 2.01 (s, 3H), 2.20-2.29 (m, 1H), 2.35-2.39 (m, 5H), 3.26-3.36 (m, 2H), 3.50-3.57 (m, 1H), 3.74-3.81 (m, 4H), 3.85-3.92 (m, 1H), 4.60-4.77 (m, 3H), 6.86 (s, 1H), 7.06-7.11 (m, 1H), 7.20-7.31 (m, 5H), 7.55 (d,  $J = 8.0$  Hz, 1H), 7.62 (d,  $J = 8.0$  Hz, 2H).  $^{13}\text{C}$  NMR ( $\text{CDCl}_3$ , 100 MHz, TMS)  $\delta$  21.5, 26.4, 29.9, 32.7, 34.7, 41.4, 47.0, 51.9, 76.0, 85.4, 109.4, 114.2, 118.9, 119.0, 121.6, 126.5, 127.1, 127.3, 129.5, 137.07, 137.12, 143.1, 208.9, 209.3. IR ( $\text{CH}_2\text{Cl}_2$ )  $\nu$  2921, 1954, 1711, 1597, 1471, 1327, 1155, 1089, 964, 897, 740, 657  $\text{cm}^{-1}$ . MS (ESI)  $m/z$  (%): 468.23 (100)  $[\text{M}+\text{NH}_4]^+$ ; HRMS (ESI) Calcd. For  $\text{C}_{26}\text{H}_{34}\text{N}_3\text{O}_3\text{S}^+1$   $[\text{M}+\text{NH}_4]^+$  requires 468.2315, found: 468.2305. Enantiomeric excess was determined by HPLC with a Chiralcel IF3 column [ $\lambda = 286$  nm; eluent: Hexane/Isopropanol = 90/10; Flow rate: 0.70 mL/min;  $t_{\text{minor}} = 65.64$  min,  $t_{\text{major}} = 62.59$  min; ee% = 80%;  $[\alpha]_{\text{D}}^{25} = -6.0$  (c 0.05,  $\text{CH}_2\text{Cl}_2$ )].

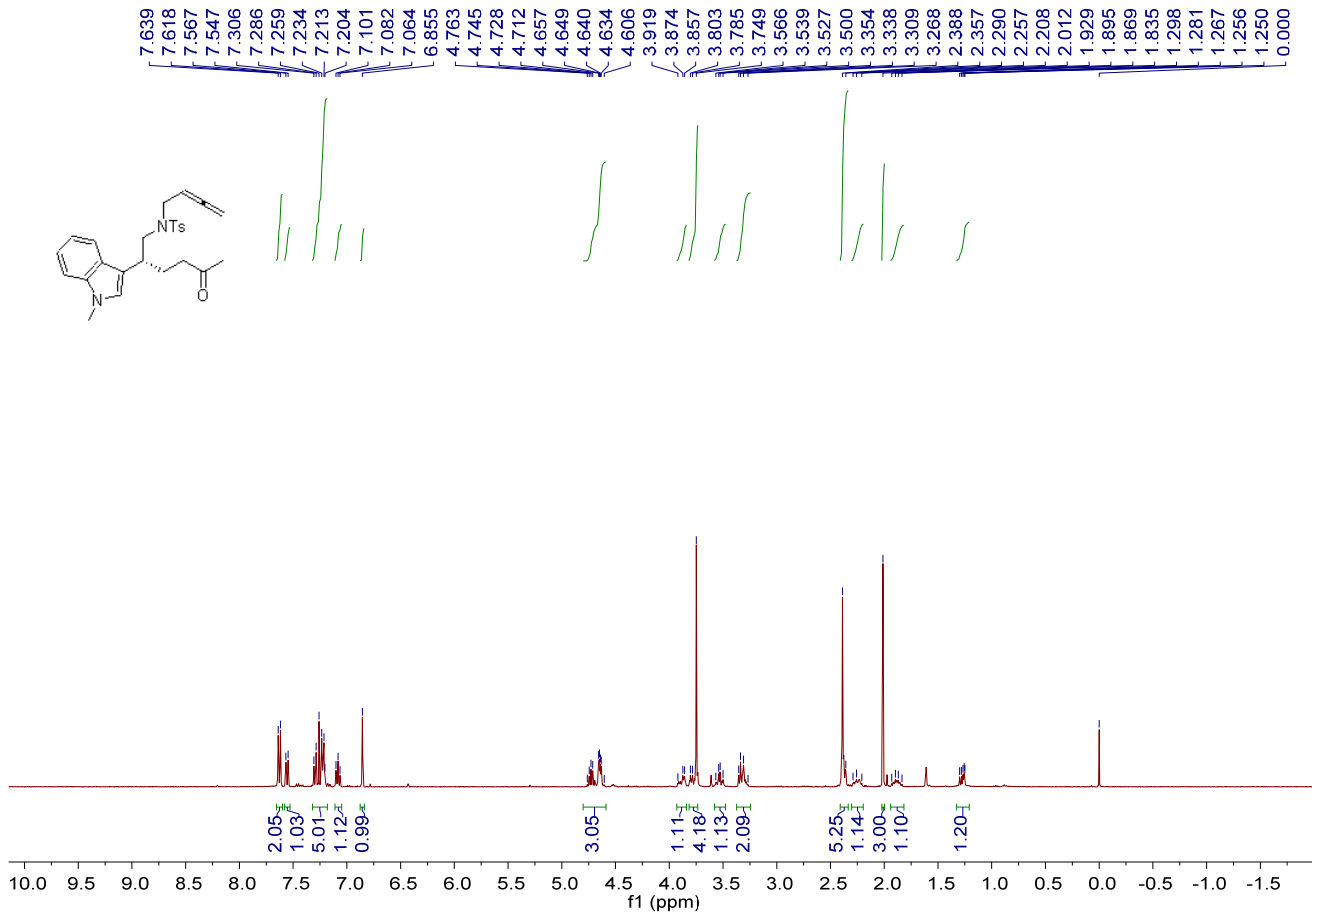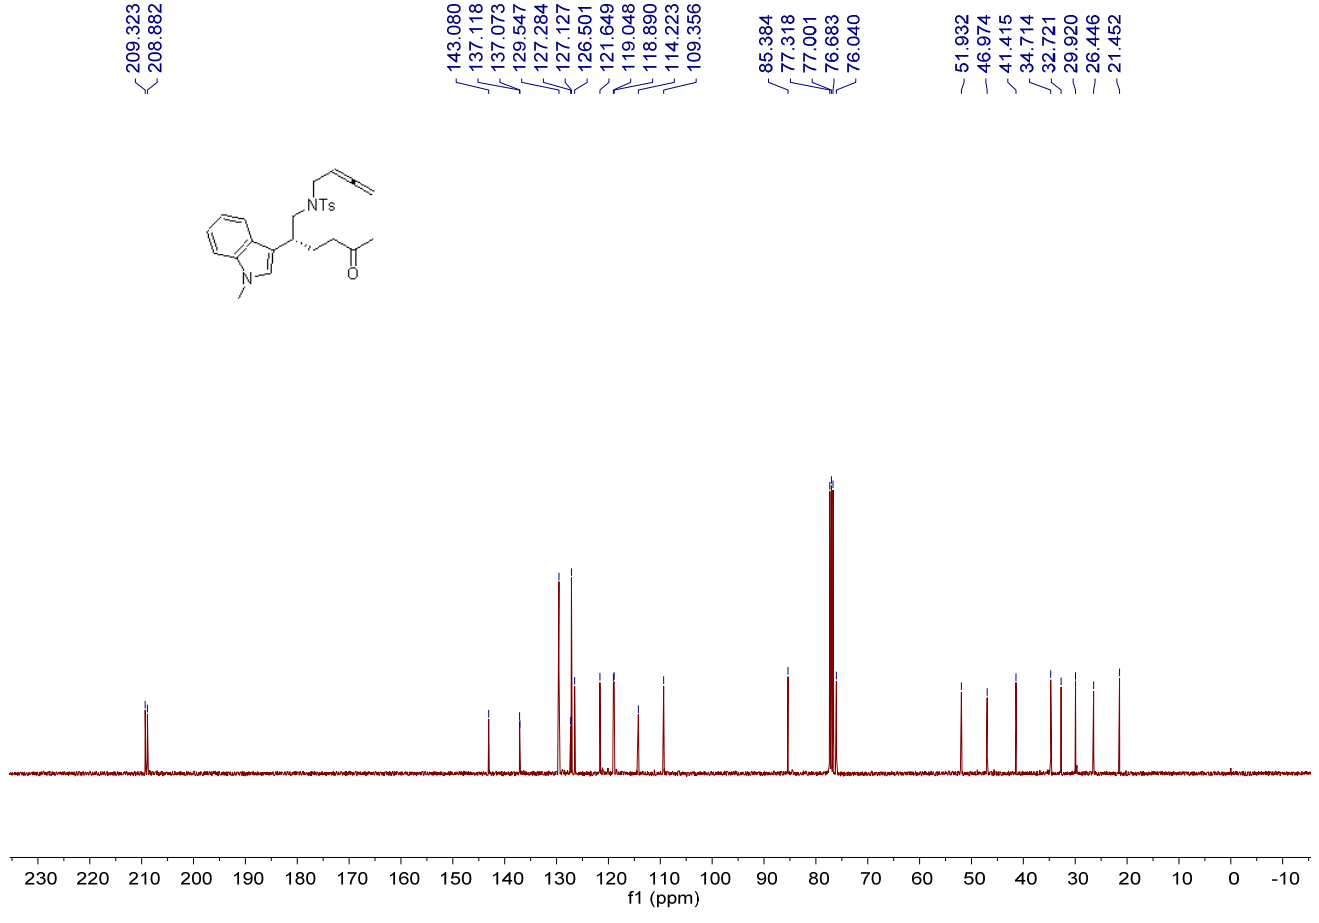



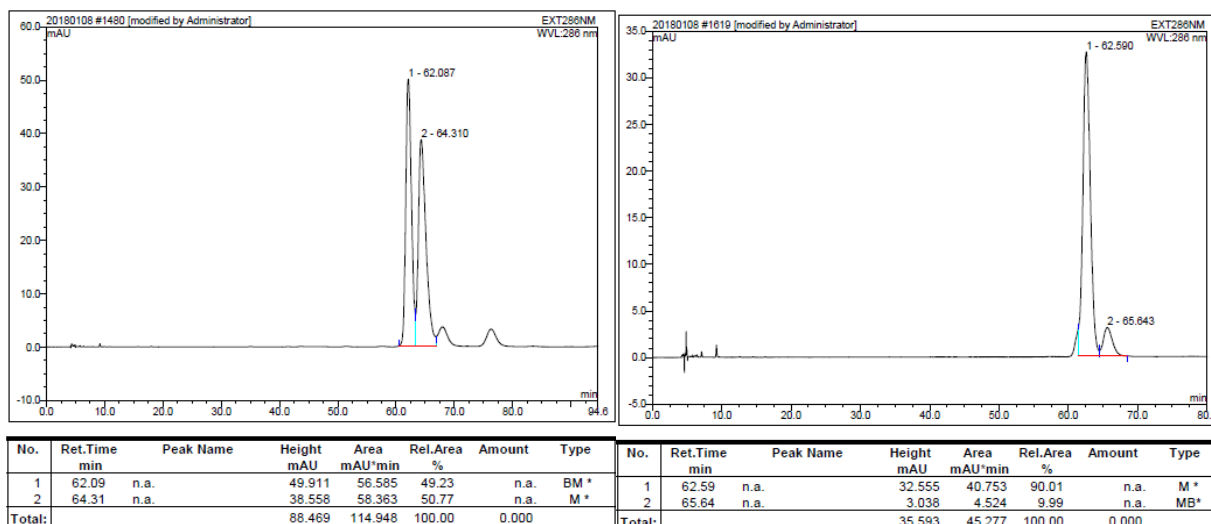

Translation: Chiralcel IF3 column [ $\lambda = 286$  nm; eluent: Hexane/Isopropanol = 90/10; Flow rate: 0.70 mL/min;  $t_{\text{minor}} = 65.64$  min,  $t_{\text{major}} = 62.59$  min; ee% = 80%].

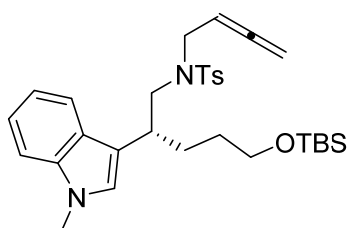

**(R)-N-(buta-2,3-dien-1-yl)-N-(5-((tert-butyldimethylsilyl)oxy)-2-(1-methyl-1H-indol-3-yl)pentyl)-4-methylbenzenesulfonamide 1x**

A white liquid, 43% yield (23.9 mg).  $^1\text{H}$  NMR ( $\text{CDCl}_3$ , TMS, 400 MHz)  $\delta$  0.15 (s, 3H), 0.16 (s, 3H), 1.01 (s, 9H), 1.56-1.71 (m, 2H), 1.80-1.91 (m, 1H), 2.07-2.17 (m, 1H), 2.53 (s, 3H), 3.35-3.51 (m, 2H), 3.63-3.73 (m, 3H), 3.87-3.93 (m, 4H), 3.97-4.04 (m, 1H), 4.79-4.94 (m, 3H), 7.00 (s, 1H), 7.19-7.23 (m, 1H), 7.32-7.44 (m, 4H), 7.71 (d,  $J = 8.0$  Hz, 1H), 7.75 (d,  $J = 8.0$  Hz, 2H).  $^{13}\text{C}$  NMR ( $\text{CDCl}_3$ , 100 MHz, TMS)  $\delta$  -5.3, 18.3, 21.5, 26.0, 28.6, 30.8, 32.7, 35.3, 47.0, 52.3, 63.2, 76.0, 85.7, 109.3, 115.0, 118.7, 119.1, 121.4, 126.5, 127.1, 127.4, 129.5, 137.1, 137.3, 143.0, 209.3. IR ( $\text{CH}_2\text{Cl}_2$ )  $\nu$  2927, 2855, 1954, 1598, 1471, 1327, 1158, 1090, 834, 737, 658  $\text{cm}^{-1}$ . MS (ESI)  $m/z$  (%): 553.29 (100)  $[\text{M}+\text{H}]^+$ ; HRMS (ESI) Calcd. For  $\text{C}_{31}\text{H}_{45}\text{N}_2\text{O}_3\text{SSi}^+1$   $[\text{M}+\text{H}]^+$  requires 553.2915, found: 553.2900. Enantiomeric excess was determined by HPLC with a Chiralcel PC1 column [ $\lambda = 214$  nm; eluent:  $\text{CO}_2$  / MeOH = 95/5; Flow rate: 2.20 mL/min;  $t_{\text{minor}} = 17.44$  min,  $t_{\text{major}} = 14.00$  min; ee% = 98%;  $[\alpha]_{\text{D}}^{25} = 31.8$  (c 0.3,  $\text{CH}_2\text{Cl}_2$ )].

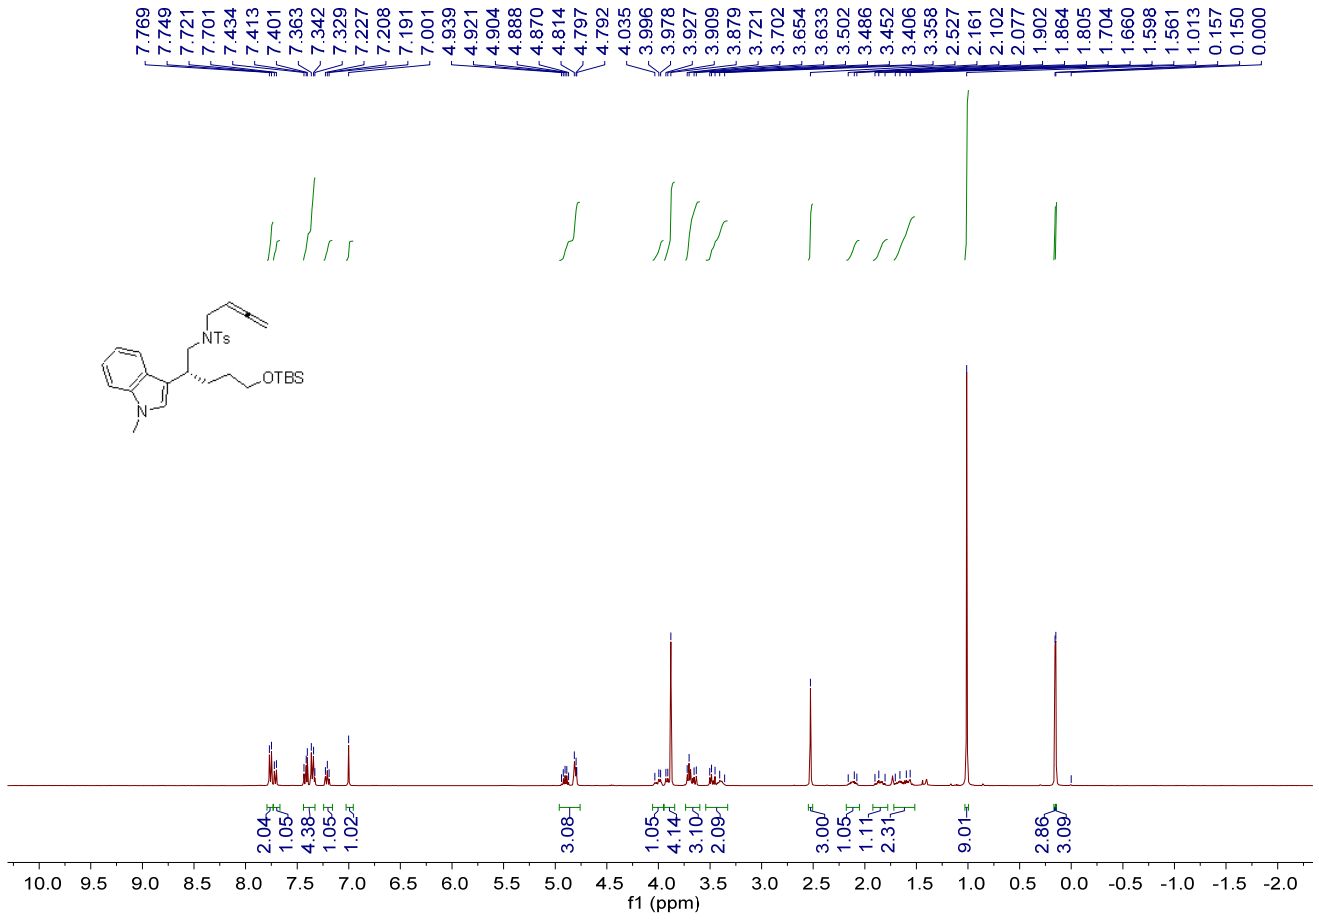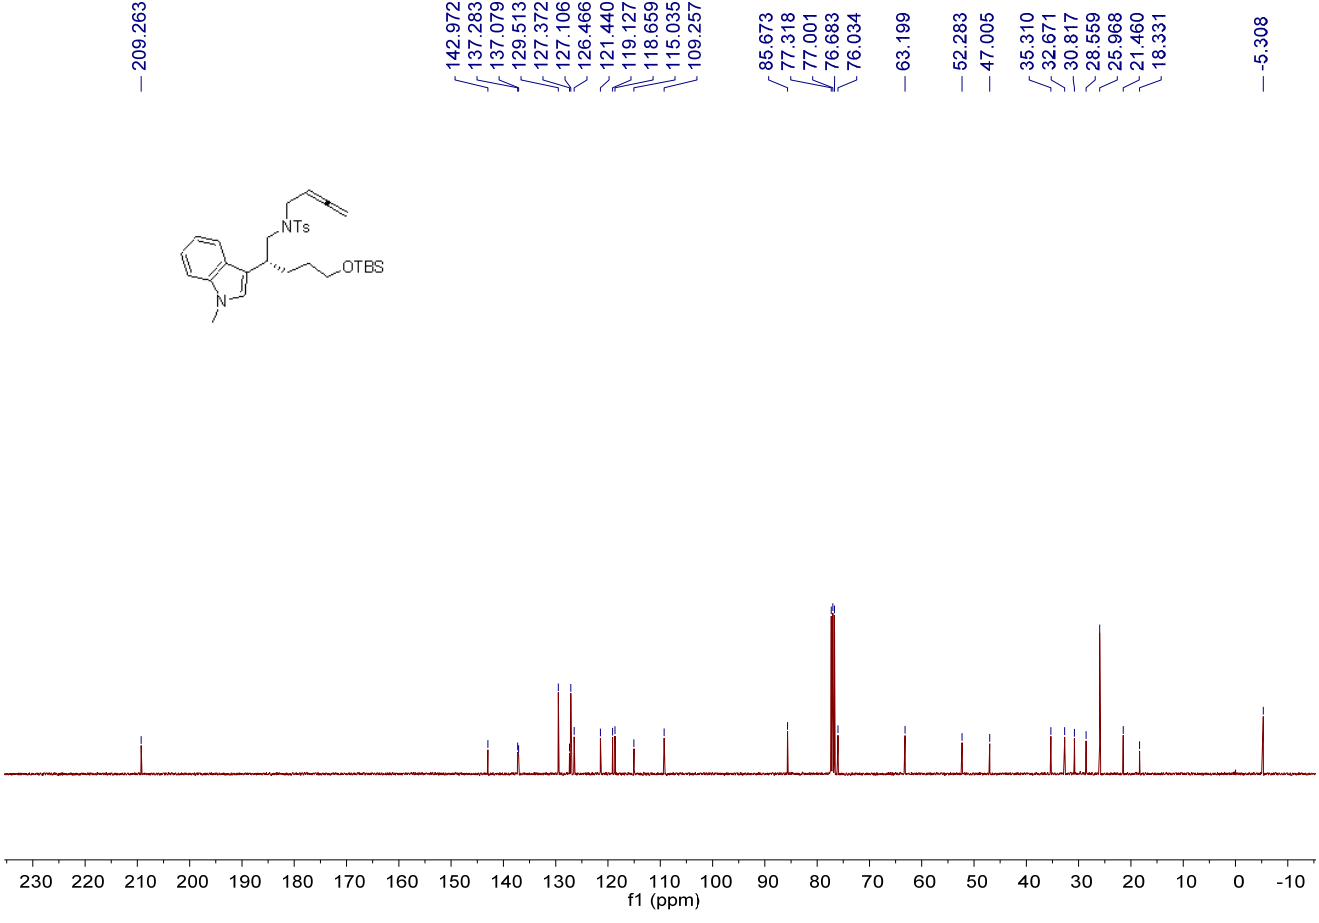

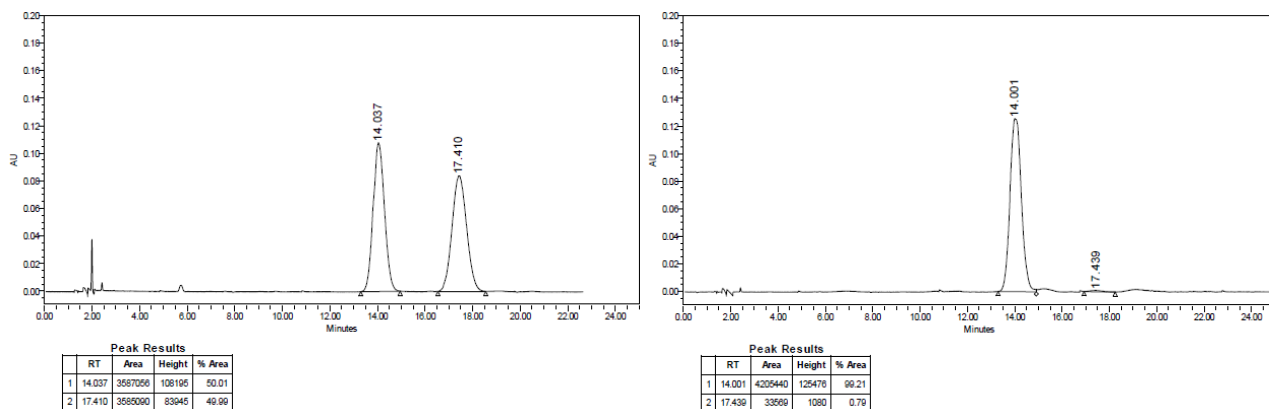

Translation: Chiralcel PC1 column [ $\lambda = 214$  nm; eluent: CO<sub>2</sub> / MeOH = 95/5; Flow rate: 2.20 mL/min;  $t_{\text{minor}} = 17.44$  min,  $t_{\text{major}} = 14.00$  min; ee% = 98%].

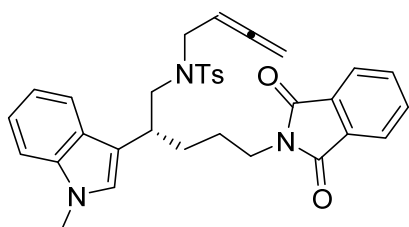

**(*R*)-*N*-(buta-2,3-dien-1-yl)-*N*-(5-(1,3-dioxisoindolin-2-yl)-2-(1-methyl-1*H*-indol-3-yl)pentyl)-4-methylbenzenesulfonamide **1y****

A white solid, 42% yield (23.2 mg). M.p.: 88-91 °C. <sup>1</sup>H NMR (CDCl<sub>3</sub>, TMS, 400 MHz)  $\delta$  1.61-1.79 (m, 3H), 1.91-2.00 (m, 1H), 2.38 (s, 3H), 3.23-3.35 (m, 2H), 3.49-3.65 (m, 3H), 3.67-3.73 (m, 4H), 3.81-3.87 (m, 1H), 4.60-4.66 (m, 2H), 4.70-4.78 (m, 1H), 6.85 (s, 1H), 6.99-7.04 (m, 1H), 7.14-7.24 (m, 4H), 7.52 (d,  $J = 7.6$  Hz, 1H), 7.60 (d,  $J = 8.0$  Hz, 2H), 7.66-7.69 (m, 2H), 7.78-7.81 (m, 2H). <sup>13</sup>C NMR (CDCl<sub>3</sub>, 100 MHz, TMS)  $\delta$  21.5, 26.6, 29.8, 32.7, 35.3, 37.9, 47.0, 52.1, 76.1, 85.6, 109.3, 114.5, 118.7, 119.0, 121.5, 123.1, 126.5, 127.1, 127.2, 129.5, 132.1, 133.8, 137.0, 137.2, 143.0, 168.3, 209.3. IR (CH<sub>2</sub>Cl<sub>2</sub>)  $\nu$  3242, 2933, 1953, 1706, 1395, 1185, 1155, 1090, 852, 741, 656 cm<sup>-1</sup>. MS (ESI)  $m/z$  (%): 568.22 (100) [M+H]<sup>+</sup>; HRMS (ESI) Calcd. For C<sub>33</sub>H<sub>34</sub>N<sub>3</sub>O<sub>4</sub>S<sup>+</sup> [M+H]<sup>+</sup> requires 568.2265, found: 568.2257. Enantiomeric excess was determined by HPLC with a Chiralcel IE3 column [ $\lambda = 214$  nm; eluent: Hexane/Isopropanol = 70/30; Flow rate: 0.70 mL/min;  $t_{\text{minor}} = 77.92$  min,  $t_{\text{major}} = 84.36$  min; ee% = 91%;  $[\alpha]_D^{25} = 36.0$  (c 1.1, CH<sub>2</sub>Cl<sub>2</sub>)].

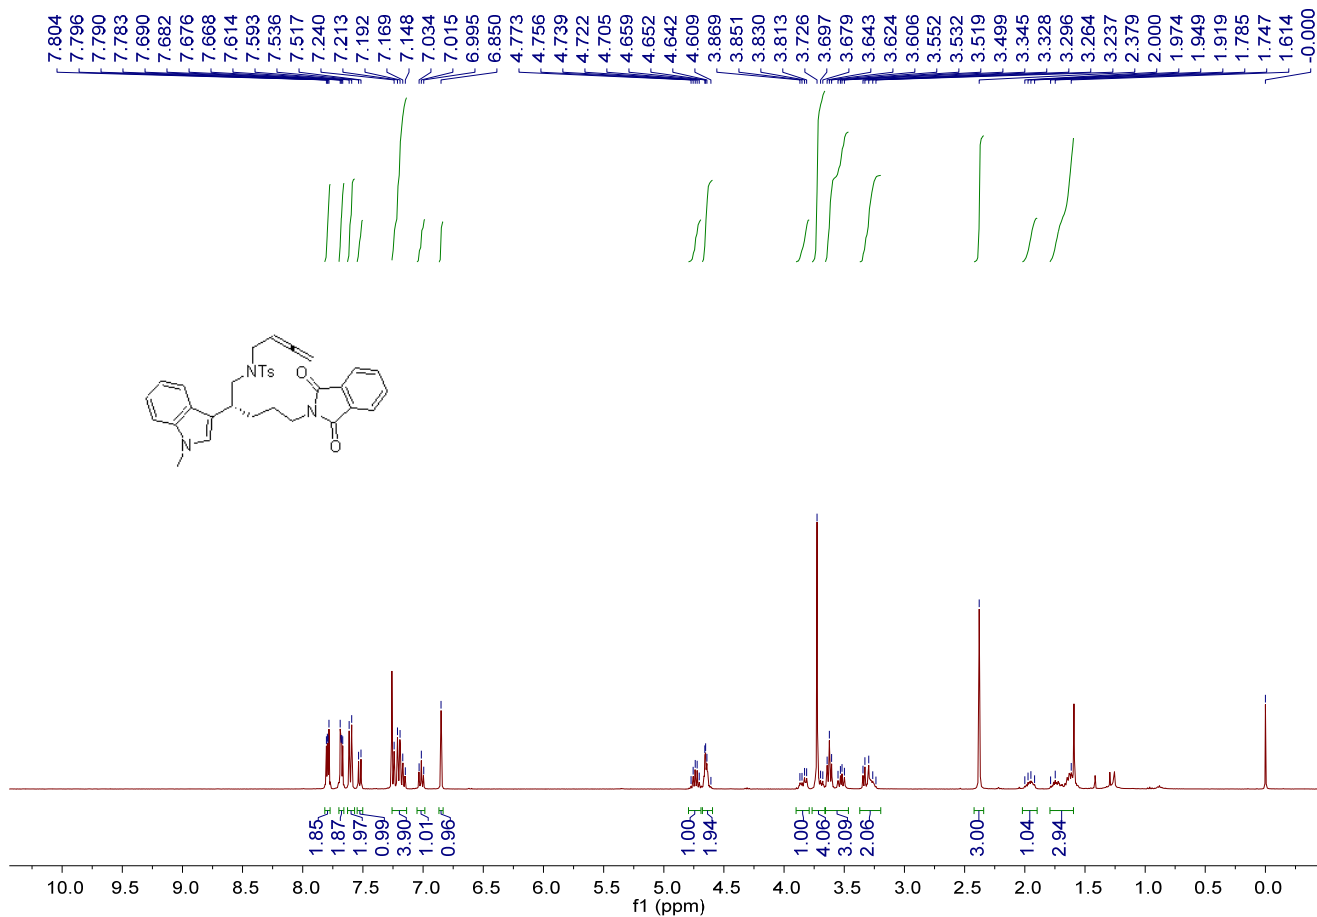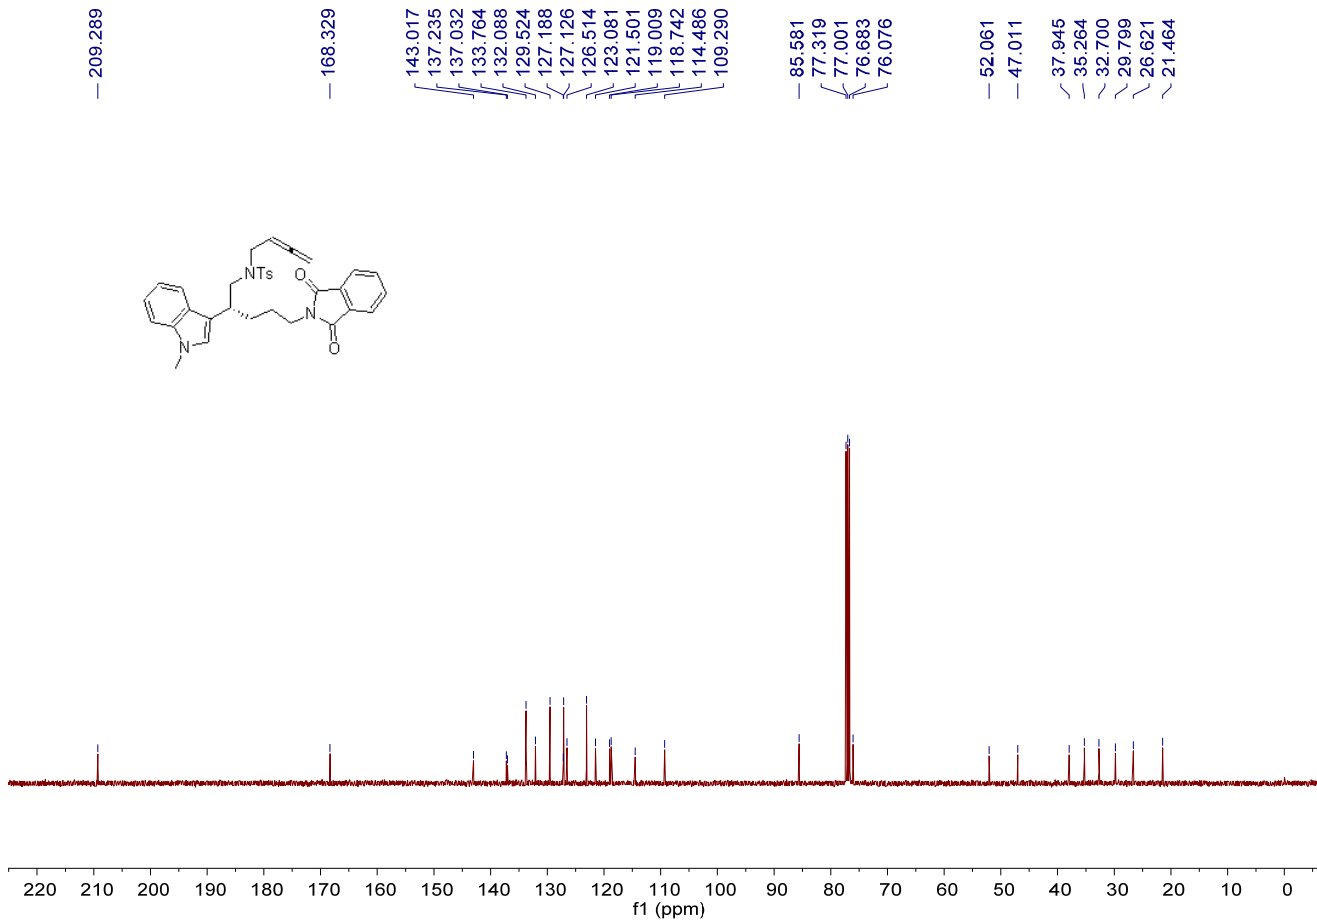

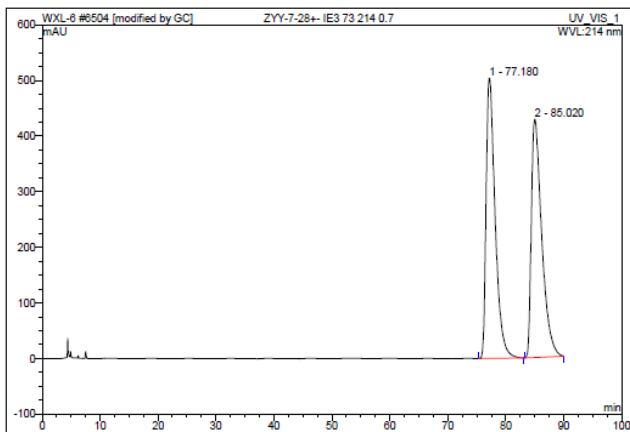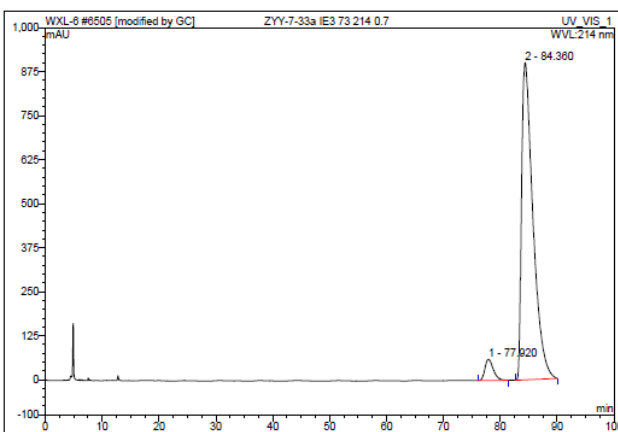

| No.           | Ret.Time min | Peak Name | Height mAU | Area mAU*min | Rel.Area % | Amount | Type |
|---------------|--------------|-----------|------------|--------------|------------|--------|------|
| 1             | 77.18        | n.a.      | 504.083    | 910.030      | 50.55      | n.a.   | BMB  |
| 2             | 85.02        | n.a.      | 428.538    | 890.212      | 49.45      | n.a.   | BMB  |
| <b>Total:</b> |              |           | 932.621    | 1800.242     | 100.00     | 0.000  |      |

| No.           | Ret.Time min | Peak Name | Height mAU | Area mAU*min | Rel.Area % | Amount | Type |
|---------------|--------------|-----------|------------|--------------|------------|--------|------|
| 1             | 77.92        | n.a.      | 60.561     | 102.862      | 4.70       | n.a.   | BMB  |
| 2             | 84.36        | n.a.      | 901.414    | 2085.839     | 95.30      | n.a.   | BMB  |
| <b>Total:</b> |              |           | 961.975    | 2188.700     | 100.00     | 0.000  |      |

Translation: Chiralcel IE3 column [ $\lambda = 214$  nm; eluent: Hexane/Isopropanol = 70/30; Flow rate: 0.70 mL/min;  $t_{\text{minor}} = 77.92$  min,  $t_{\text{major}} = 84.36$  min; ee% = 91%]. (Note: In the 5 minute position, there is the peak of dichloromethane, due to that the sample was dissolved in dichloromethane for measuring).

## 7. Characterization and spectra charts for compounds 2.

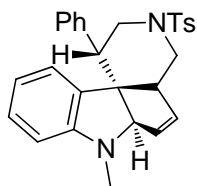

### **(1*S*,4*aR*,6*aR*,11*bS*)-7-methyl-1-phenyl-3-tosyl-2,3,4,4*a*,6*a*,7-hexahydro-1*H*-pyrido[4',3':2,3]cyclopenta[1,2-*b*]indole 2a**

A white solid, 49% yield (22.3 mg). M.p.: 183-186 °C. <sup>1</sup>H NMR (CDCl<sub>3</sub>, TMS, 400 MHz) δ 2.38 (s, 3H), 2.40-2.44 (m, 1H), 2.46 (s, 3H), 3.02 (dd, *J* = 12.0, 12.0 Hz, 1H), 3.21-3.29 (m, 2H), 3.68 (dd, *J* = 11.2, 4.8 Hz, 1H), 3.93 (dd, *J* = 12.4, 6.0 Hz, 1H), 4.45 (s, 1H), 5.69 (d, *J* = 6.0 Hz, 1H), 5.83-5.86 (m, 1H), 5.95 (d, *J* = 7.6 Hz, 1H), 6.60-6.64 (m, 1H), 6.69-6.72 (m, 2H), 6.95-7.09 (m, 5H), 7.34 (d, *J* = 8.0 Hz, 2H), 7.68 (d, *J* = 8.0 Hz, 2H). <sup>13</sup>C NMR (CDCl<sub>3</sub>, 100 MHz, TMS) δ 21.5, 32.0, 47.71, 47.73, 50.4, 50.7, 57.4, 72.8, 106.0, 116.4, 122.8, 126.8, 127.3, 127.6, 127.7, 128.6, 129.0, 129.8, 133.8, 134.7, 134.9, 138.6, 143.6, 149.9. IR (CH<sub>2</sub>Cl<sub>2</sub>) ν 3054, 2920, 2852, 1604, 1494, 1339, 1161, 937, 860, 733, 662 cm<sup>-1</sup>. MS (ESI) *m/z* (%): 457.19 (100) [M+H]<sup>+</sup>; HRMS (DART) Calcd. For C<sub>28</sub>H<sub>29</sub>N<sub>2</sub>O<sub>2</sub>S<sup>+</sup>[M+H]<sup>+</sup> requires 457.1944, found: 457.1940. Enantiomeric excess was determined by HPLC with a Chiralcel IC column [λ = 254 nm; eluent: Hexane/Isopropanol = 86/14; Flow rate: 0.70 mL/min; *t*<sub>minor</sub> = 41.05 min, *t*<sub>major</sub> = 37.92 min; ee% = 91%; [α]<sub>D</sub><sup>25</sup> = -162.9 (c 0.1, CH<sub>2</sub>Cl<sub>2</sub>)].

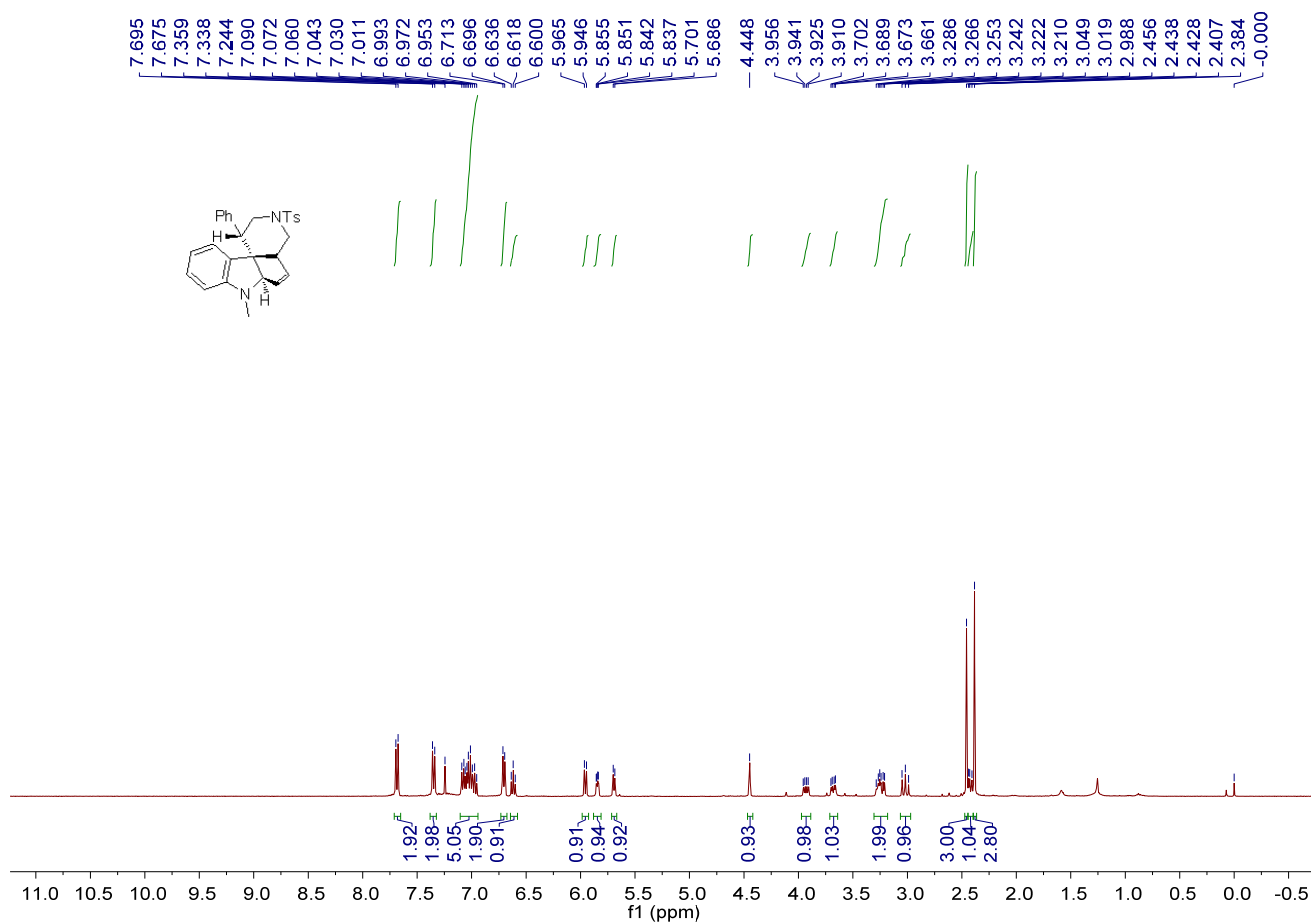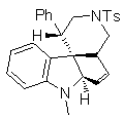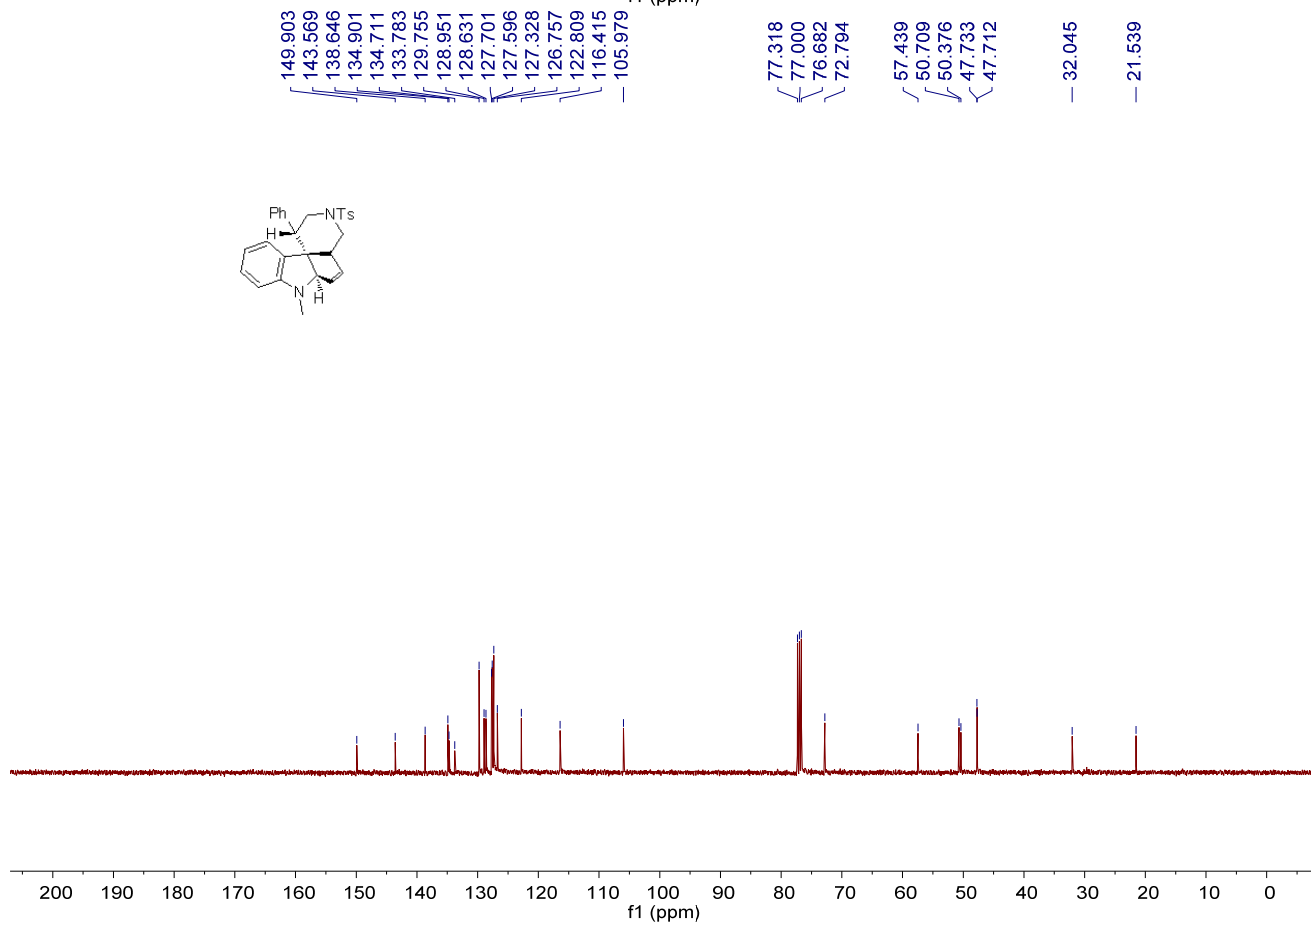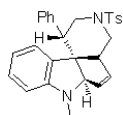

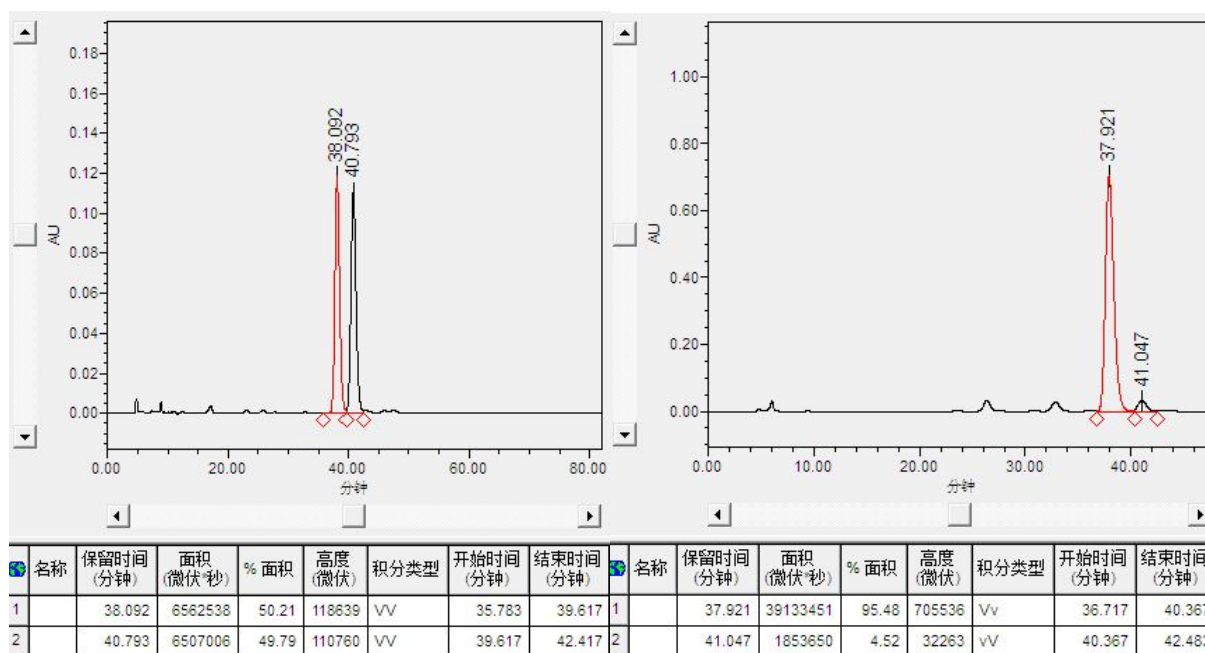

Translation: Chiralcel IC column [ $\lambda = 254$  nm; eluent: Hexane/Isopropanol = 86/14; Flow rate: 0.70 mL/min;  $t_{\text{minor}} = 41.05$  min,  $t_{\text{major}} = 37.92$  min; ee% = 91%].

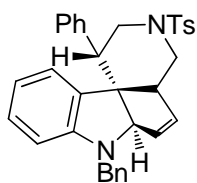

**(1*S*,4*aR*,6*aR*,11*bS*)-7-benzyl-1-phenyl-3-tosyl-2,3,4,4*a*,6*a*,7-hexahydro-1*H*-pyrido[4',3':2,3]cyclopenta[1,2-*b*]indole 2b**

A white solid, 34% yield (18.1 mg). M.p.: 117-120 °C.  $^1\text{H}$  NMR ( $\text{CDCl}_3$ , TMS, 400 MHz)  $\delta$  2.21 (dd,  $J = 12.0, 9.6$  Hz, 1H), 2.43 (s, 3H), 2.85 (dd,  $J = 12.0, 12.0$  Hz, 1H), 3.28-3.33 (m, 2H), 3.75 (dd,  $J = 11.6, 4.4$  Hz, 1H), 3.84 (d,  $J = 15.2$  Hz, 1H), 3.90 (d,  $J = 15.2$  Hz, 1H), 4.00 (dd,  $J = 12.0, 6.0$  Hz, 1H), 4.42 (s, 1H), 5.61 (d,  $J = 6.0$  Hz, 1H), 5.83 (dd,  $J = 6.0, 2.4$  Hz, 1H), 5.94 (d,  $J = 7.6$  Hz, 1H), 6.65-6.73 (m, 5H), 6.92-6.97 (m, 1H), 7.07-7.11 (m, 2H), 7.16-7.19 (m, 5H), 7.32 (d,  $J = 8.0$  Hz, 2H), 7.66 (d,  $J = 8.0$  Hz, 2H).  $^{13}\text{C}$  NMR ( $\text{CDCl}_3$ , 100 MHz, TMS)  $\delta$  21.5, 47.8, 47.9, 50.7, 50.8, 51.1, 57.4, 71.3, 107.3, 117.4, 123.0, 126.7, 127.3, 127.5, 127.7, 127.8, 128.1, 128.6, 129.0, 129.8, 133.5, 135.0, 135.3, 138.0, 138.9, 143.6, 149.7. IR ( $\text{CH}_2\text{Cl}_2$ )  $\nu$  3058, 2920, 1600, 1484, 1344, 1162, 1089, 936, 859, 729, 659  $\text{cm}^{-1}$ . MS (ESI)  $m/z$  (%): 533.22 (100)  $[\text{M}+\text{H}]^+$ ; HRMS (DART) Calcd. For  $\text{C}_{34}\text{H}_{33}\text{N}_2\text{O}_2\text{S}^+[\text{M}+\text{H}]^+$  requires 533.2257, found: 533.2251. Enantiomeric excess was determined by HPLC with a Chiralcel IC column [ $\lambda = 254$  nm; eluent: Hexane/Isopropanol = 86/14; Flow rate: 0.70



mL/min;  $t_{\text{minor}} = 39.86$  min,  $t_{\text{major}} = 34.48$  min; ee% = 94%;  $[\alpha]_{\text{D}}^{25} = -129.4$  (c 0.4,  $\text{CH}_2\text{Cl}_2$ ).

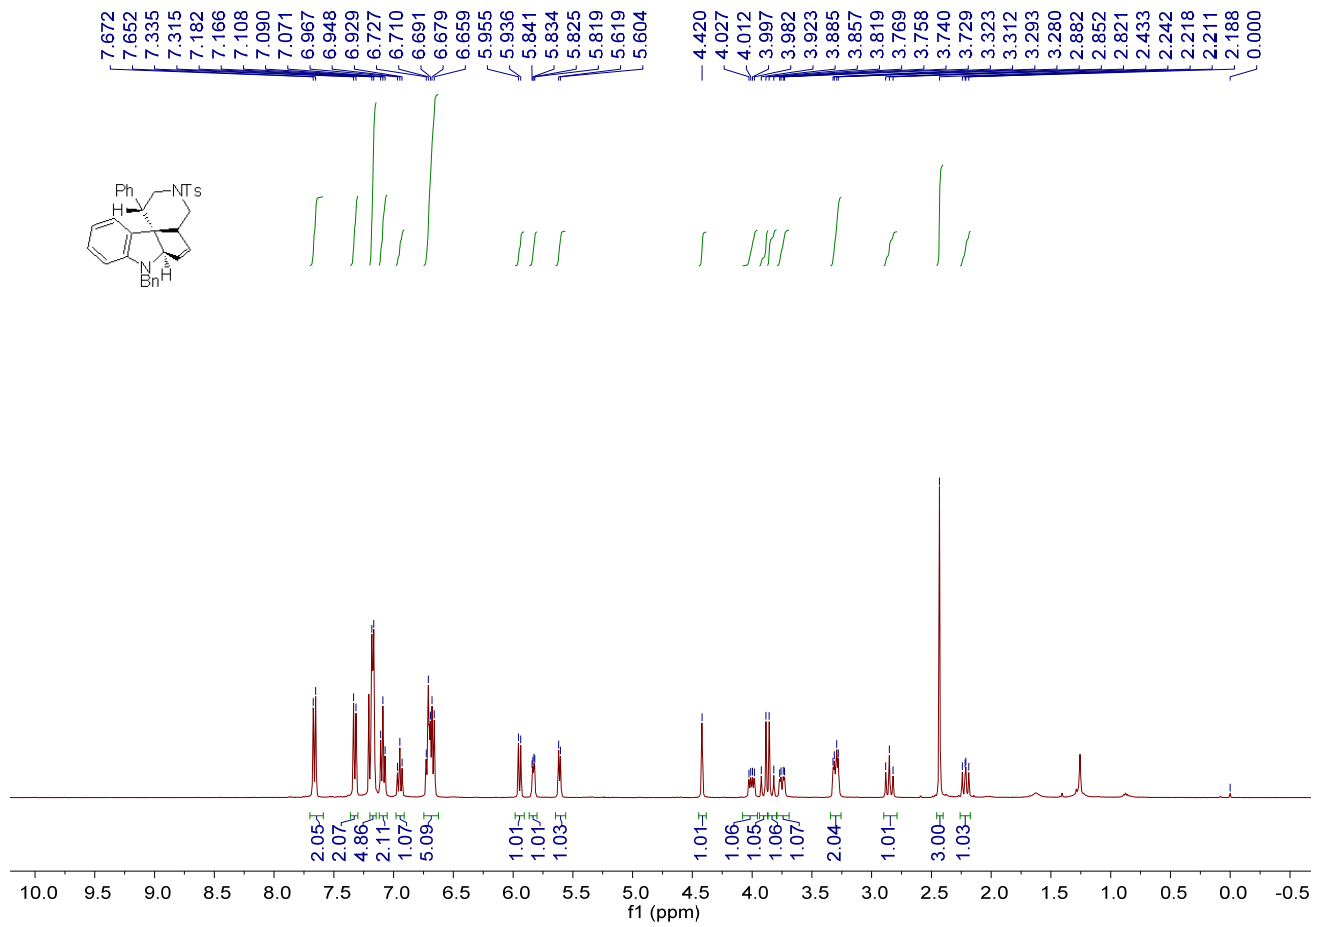

149.733  
143.604  
138.928  
138.003  
135.254  
135.031  
133.463  
129.756  
129.019  
128.564  
128.119  
127.771  
127.749  
127.542  
127.306  
126.743  
122.967  
117.409  
107.272

77.318  
77.000  
76.682  
71.285  
57.387  
51.054  
50.753  
50.681  
47.937  
47.843

21.496

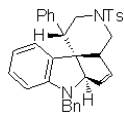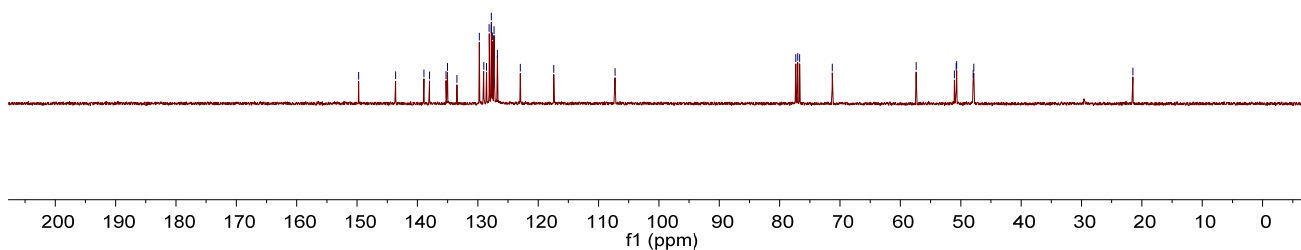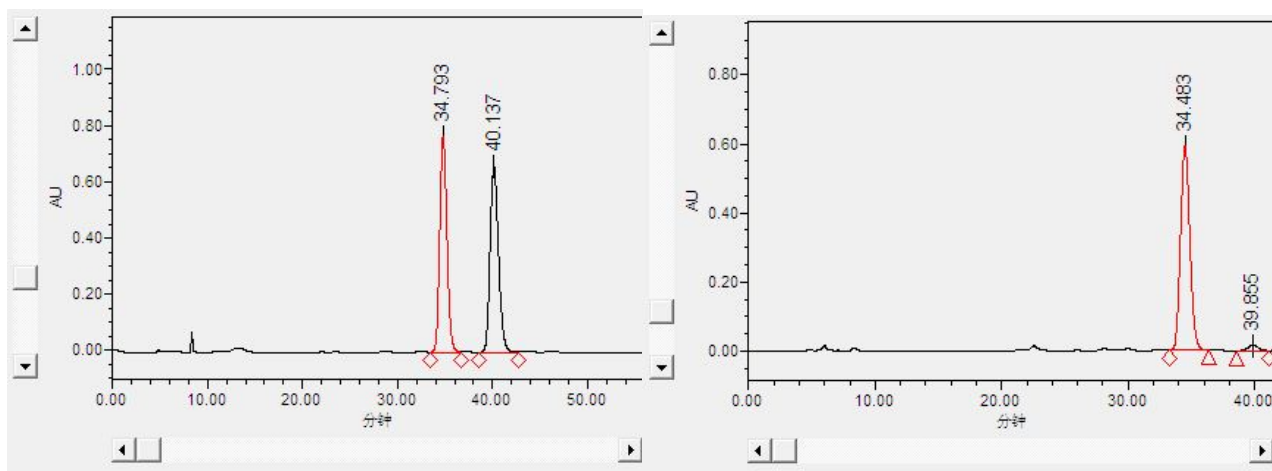

| 名称 | 保留时间 (分钟) | 面积 (微伏·秒) | % 面积  | 高度 (微伏) | 积分类型 | 开始时间 (分钟) | 结束时间 (分钟) | 名称 | 保留时间 (分钟) | 面积 (微伏·秒) | % 面积  | 高度 (微伏) | 积分类型 | 开始时间 (分钟) | 结束时间 (分钟) |
|----|-----------|-----------|-------|---------|------|-----------|-----------|----|-----------|-----------|-------|---------|------|-----------|-----------|
| 1  | 34.793    | 40703197  | 49.86 | 769500  | VV   | 33.467    | 36.650    | 1  | 34.483    | 30325837  | 97.02 | 592462  | VB   | 33.283    | 36.383    |
| 2  | 40.137    | 40935313  | 50.14 | 663426  | VV   | 38.550    | 42.717    | 2  | 39.855    | 930795    | 2.98  | 15877   | BV   | 38.600    | 41.117    |

Translation: Chiralcel IC column [ $\lambda = 254$  nm; eluent: Hexane/Isopropanol = 86/14; Flow rate: 0.70 mL/min;  $t_{\text{minor}} = 39.86$  min,  $t_{\text{major}} = 34.48$  min; ee% = 94%].

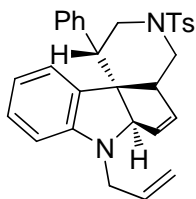

**(1*S*,4*aR*,6*aR*,11*bS*)-7-allyl-1-phenyl-3-tosyl-2,3,4,4*a*,6*a*,7-hexahydro-1*H*-pyrido[4',3':2,3]cyclopenta[1,2-*b*]indole 2c**

A white solid, 45% yield (21.7 mg). M.p.: 107-110 °C. <sup>1</sup>H NMR (CDCl<sub>3</sub>, TMS, 400 MHz) δ 2.34 (dd, *J* = 12.0, 8.8 Hz, 1H), 2.46 (s, 3H), 2.95 (dd, *J* = 12.0, 12.0 Hz, 1H), 3.21-3.33 (m, 4H), 3.73 (dd, *J* = 11.6, 4.8 Hz, 1H), 3.98 (dd, *J* = 12.0, 5.6 Hz, 1H), 4.47 (s, 1H), 4.82 (d, *J* = 17.2 Hz, 1H), 4.94 (d, *J* = 10.0 Hz, 1H), 5.34-5.45 (m, 1H), 5.62 (d, *J* = 6.0 Hz, 1H), 5.83 (dd, *J* = 6.0, 2.4 Hz, 1H), 6.01 (d, *J* = 8.0 Hz, 1H), 6.64-6.69 (m, 3H), 6.95-7.14 (m, 5H), 7.35 (d, *J* = 8.0 Hz, 2H), 7.68 (d, *J* = 8.0 Hz, 2H). <sup>13</sup>C NMR (CDCl<sub>3</sub>, 100 MHz, TMS) δ 21.6, 47.7, 47.8, 49.1, 50.5, 50.8, 57.4, 71.2, 106.6, 116.3, 116.9, 123.0, 126.8, 127.5, 127.6, 127.8, 128.6, 129.6, 129.8, 133.7, 134.7, 134.8, 134.9, 138.7, 143.6, 149.2. IR (CH<sub>2</sub>Cl<sub>2</sub>) ν 3053, 2921, 2850, 1601, 1485, 1343, 1161, 1089, 934, 858, 730, 659 cm<sup>-1</sup>. MS (ESI) *m/z* (%): 483.20 (100) [M+H]<sup>+</sup>; HRMS (ESI) Calcd. For C<sub>30</sub>H<sub>31</sub>N<sub>2</sub>O<sub>2</sub>S<sup>+</sup>[M+H]<sup>+</sup> requires 483.2101, found: 483.2092. Enantiomeric excess was determined by HPLC with a Chiralcel IA column [λ = 214 nm; eluent: Hexane/Isopropanol = 90/10; Flow rate: 0.70 mL/min; *t*<sub>minor</sub> = 16.34 min, *t*<sub>major</sub> = 14.46 min; ee% = 94%; [α]<sub>D</sub><sup>25</sup> = -102.5 (c 0.08, CH<sub>2</sub>Cl<sub>2</sub>)].

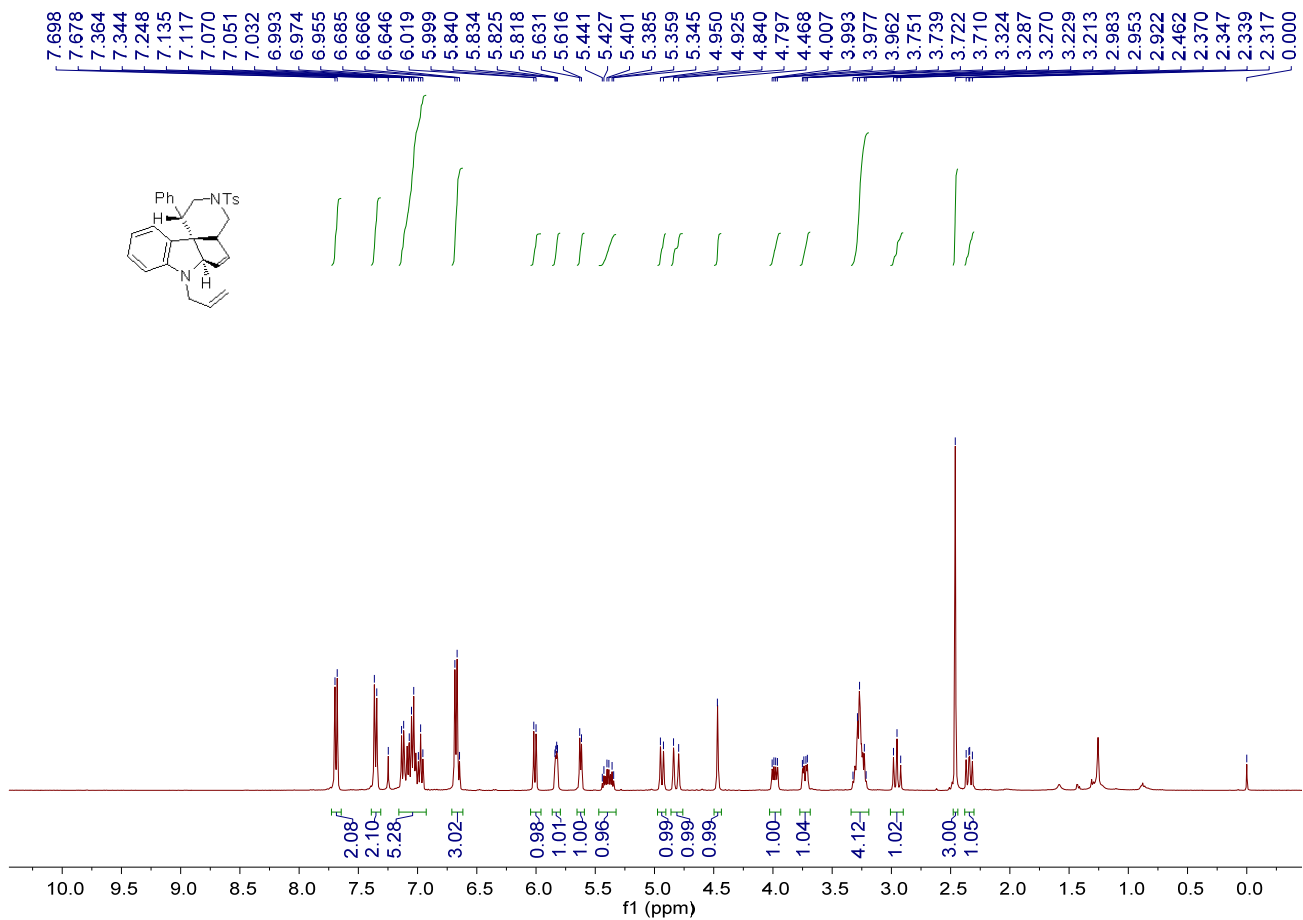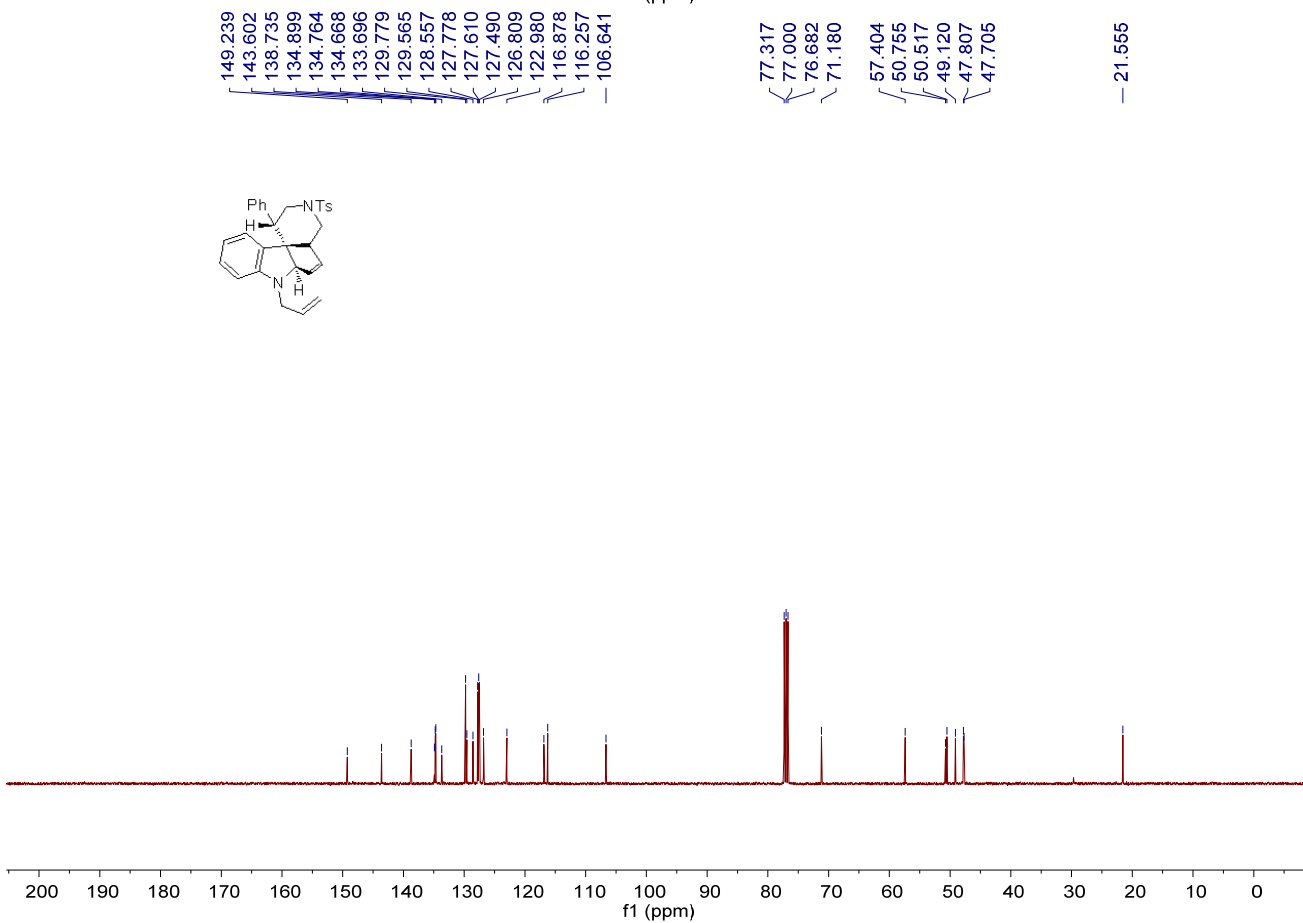

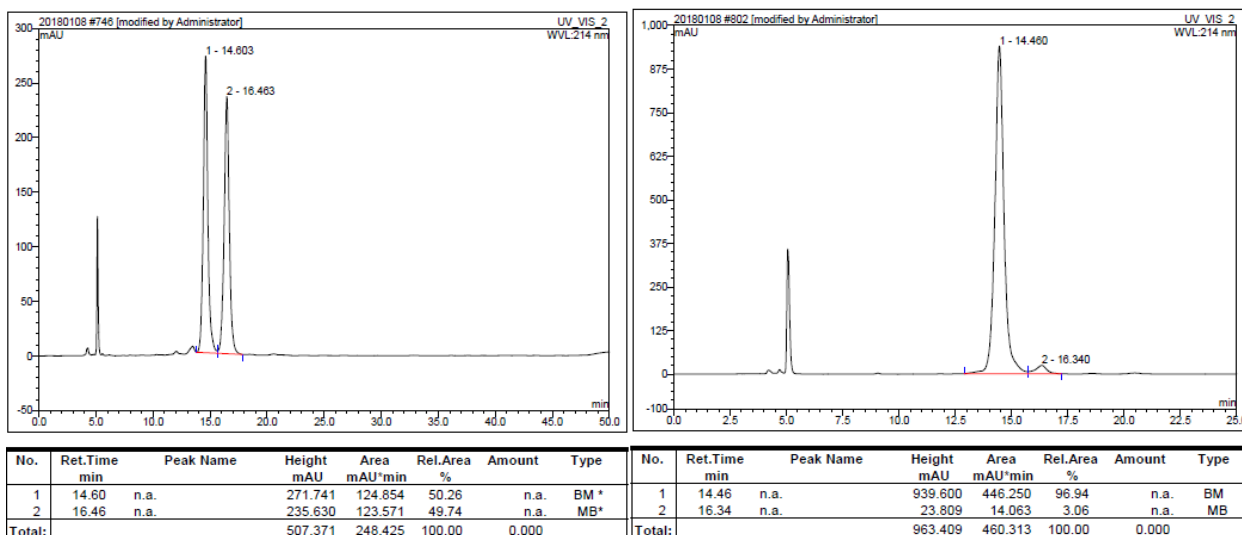

Translation: Chiralcel IA column [ $\lambda = 214$  nm; eluent: Hexane/Isopropanol = 90/10; Flow rate: 0.70 mL/min;  $t_{\text{minor}} = 16.34$  min,  $t_{\text{major}} = 14.46$  min; ee% = 94%]. (Note: In the 5 minute position, there is the peak of dichloromethane, due to that the sample was dissolved in dichloromethane for measuring).

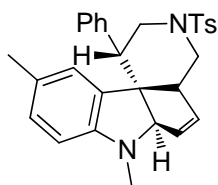

**(1S,4aR,6aR,11bS)-7,10-dimethyl-1-phenyl-3-tosyl-2,3,4,4a,6a,7-hexahydro-1H-pyrido[4',3':2,3]cyclopenta[1,2-b]indole 2d**

A white solid, 49% yield (23.0 mg). M.p.: 89-92 °C.  $^1\text{H}$  NMR ( $\text{CDCl}_3$ , TMS, 400 MHz)  $\delta$  2.26 (s, 3H), 2.33 (s, 3H), 2.37 (dd,  $J = 12.0, 8.8$  Hz, 1H), 2.47 (s, 3H), 2.97 (dd,  $J = 12.0, 12.0$  Hz, 1H), 3.20-3.28 (m, 2H), 3.71 (dd,  $J = 11.6, 4.8$  Hz, 1H), 3.97 (dd,  $J = 12.4, 6.0$  Hz, 1H), 4.40 (s, 1H), 5.68 (d,  $J = 5.6$  Hz, 1H), 5.82-5.85 (m, 1H), 5.89 (d,  $J = 8.0$  Hz, 1H), 6.68-6.71 (m, 2H), 6.79 (d,  $J = 8.0$  Hz, 1H), 6.91 (s, 1H), 7.00-7.09 (m, 3H), 7.35 (d,  $J = 8.0$  Hz, 2H), 7.69 (d,  $J = 8.0$  Hz, 2H).  $^{13}\text{C}$  NMR ( $\text{CDCl}_3$ , 100 MHz, TMS)  $\delta$  20.9, 21.6, 32.6, 47.7, 47.9, 50.5, 50.7, 57.5, 73.0, 106.1, 123.6, 125.7, 126.7, 127.3, 127.6, 127.7, 129.0, 129.8, 133.8, 134.8, 135.0, 138.8, 143.6, 147.9. IR ( $\text{CH}_2\text{Cl}_2$ )  $\nu$  2962, 2852, 1496, 1341, 1259, 1016, 865, 795, 696  $\text{cm}^{-1}$ . MS (ESI)  $m/z$  (%): 471.20 (100)  $[\text{M}+\text{H}]^+$ ; HRMS (ESI) Calcd. For  $\text{C}_{29}\text{H}_{31}\text{N}_2\text{O}_2\text{S}^+[\text{M}+\text{H}]^+$  requires 471.2101, found: 471.2092. Enantiomeric excess was determined by HPLC with a Chiralcel IA column [ $\lambda = 214$  nm; eluent: Hexane/Isopropanol = 50/50; Flow rate: 0.70 mL/min;  $t_{\text{minor}} = 7.65$  min,  $t_{\text{major}} = 7.02$  min; ee% = 92%;  $[\alpha]_{\text{D}}^{25} = -132.5$  (c 0.12,  $\text{CH}_2\text{Cl}_2$ )].

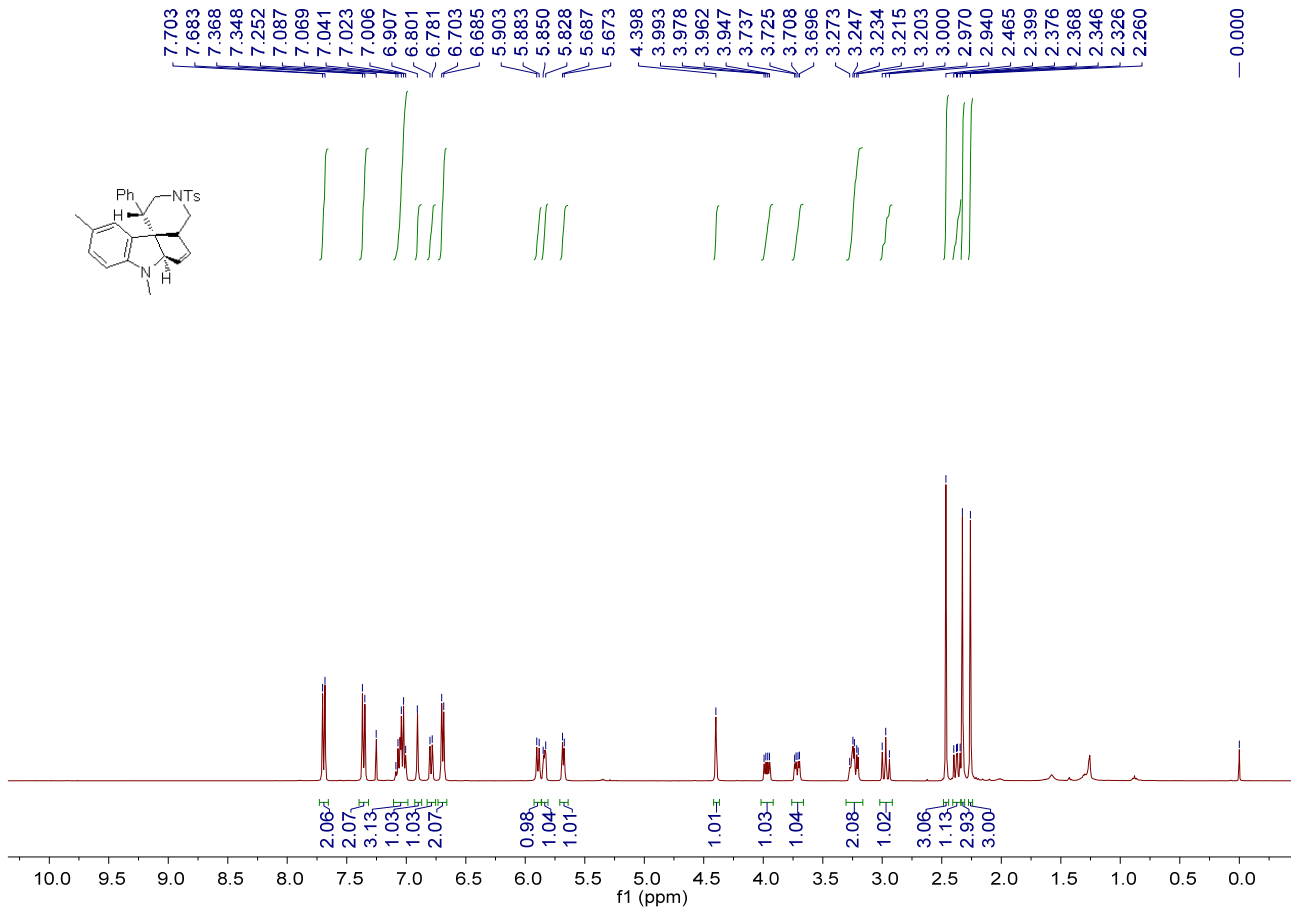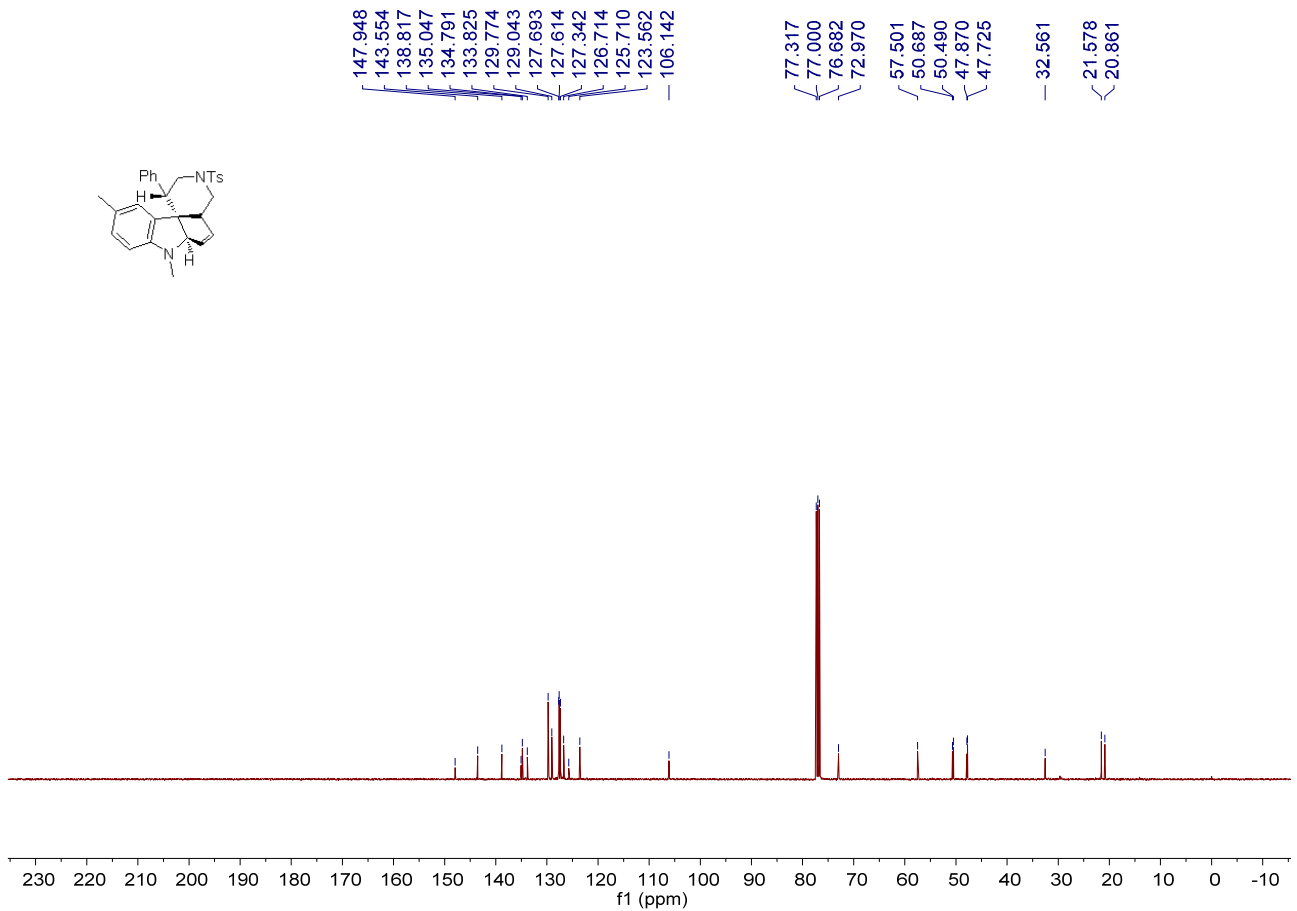

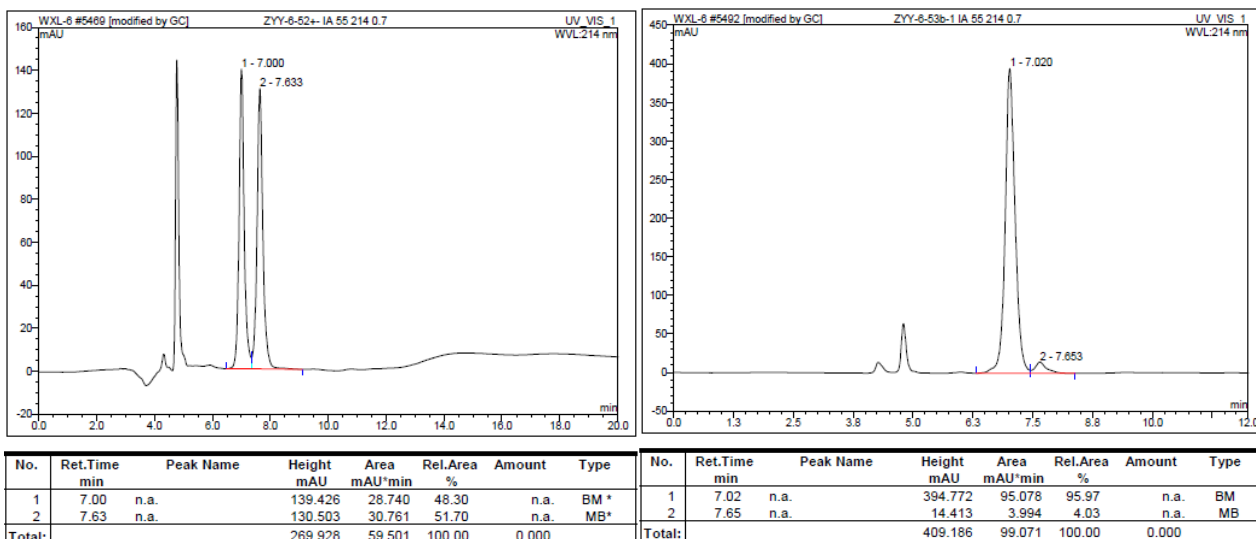

Translation: Chiralcel IA column [ $\lambda = 214$  nm; eluent: Hexane/Isopropanol = 50/50; Flow rate: 0.70 mL/min;  $t_{\text{minor}} = 7.65$  min,  $t_{\text{major}} = 7.02$  min; ee% = 92%]. (Note: In the 5 minute position, there is the peak of dichloromethane, due to that the sample was dissolved in dichloromethane for measuring).

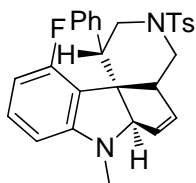

**(1S,4aR,6aR,11bS)-11-fluoro-7-methyl-1-phenyl-3-tosyl-2,3,4,4a,6a,7-hexahydro-1H-pyrido[4',3':2,3]cyclopenta[1,2-b]indole 2e**

A white solid, 46% yield (21.9 mg). M.p.: 176-179 °C.  $^1\text{H}$  NMR ( $\text{CDCl}_3$ , TMS, 400 MHz)  $\delta$  2.43 (s, 3H), 2.53 (s, 3H), 3.10 (dd,  $J = 12.0, 4.0$  Hz, 1H), 3.38-3.52 (m, 3H), 3.56-3.63 (m, 2H), 4.72 (s, 1H), 5.73 (d,  $J = 8.0$  Hz, 1H), 5.84-5.88 (m, 2H), 6.18-6.24 (m, 1H), 6.82-6.89 (m, 1H), 6.91-6.94 (m, 2H), 7.03-7.08 (m, 3H), 7.31 (d,  $J = 8.0$  Hz, 2H), 7.67 (d,  $J = 8.0$  Hz, 2H).  $^{13}\text{C}$  NMR ( $\text{CDCl}_3$ , 100 MHz, TMS)  $\delta$  21.5, 32.3, 43.2, 46.3, 46.8, 51.5, 56.69, 56.71, 73.9, 101.8 (d,  $J = 2.3$  Hz), 103.4 (d,  $J = 21.0$  Hz), 118.3 (d,  $J = 16.4$  Hz), 127.1, 127.4, 127.5, 127.9, 129.2, 129.7, 130.1 (d,  $J = 9.6$  Hz), 134.0, 135.1, 138.2, 143.4, 152.0 (d,  $J = 9.6$  Hz), 159.8 (d,  $J = 241.1$  Hz).  $^{19}\text{F}$  NMR ( $\text{CDCl}_3$ , 376 MHz,  $\text{CFCl}_3$ )  $\delta$  -122.4. IR ( $\text{CH}_2\text{Cl}_2$ )  $\nu$  3059, 2901, 1913, 1627, 1467, 1159, 1087, 958, 860, 782, 661  $\text{cm}^{-1}$ . MS (ESI)  $m/z$  (%): 475.18 (100)  $[\text{M}+\text{H}]^+$ ; HRMS (ESI) Calcd. For  $\text{C}_{28}\text{H}_{28}\text{N}_2\text{O}_2\text{FS}^+ [\text{M}+\text{H}]^+$  requires 475.1850, found: 475.1841. Enantiomeric excess was determined by HPLC with a Chiralcel IC column [ $\lambda = 254$  nm; eluent: Hexane/Isopropanol = 90/10; Flow rate: 0.70 mL/min;  $t_{\text{minor}} = 44.07$  min,

$t_{\text{major}} = 47.53 \text{ min}; ee\% = 95\%; [\alpha]_{\text{D}}^{25} = -62.3 \text{ (c 0.10, CH}_2\text{Cl}_2\text{)}].$

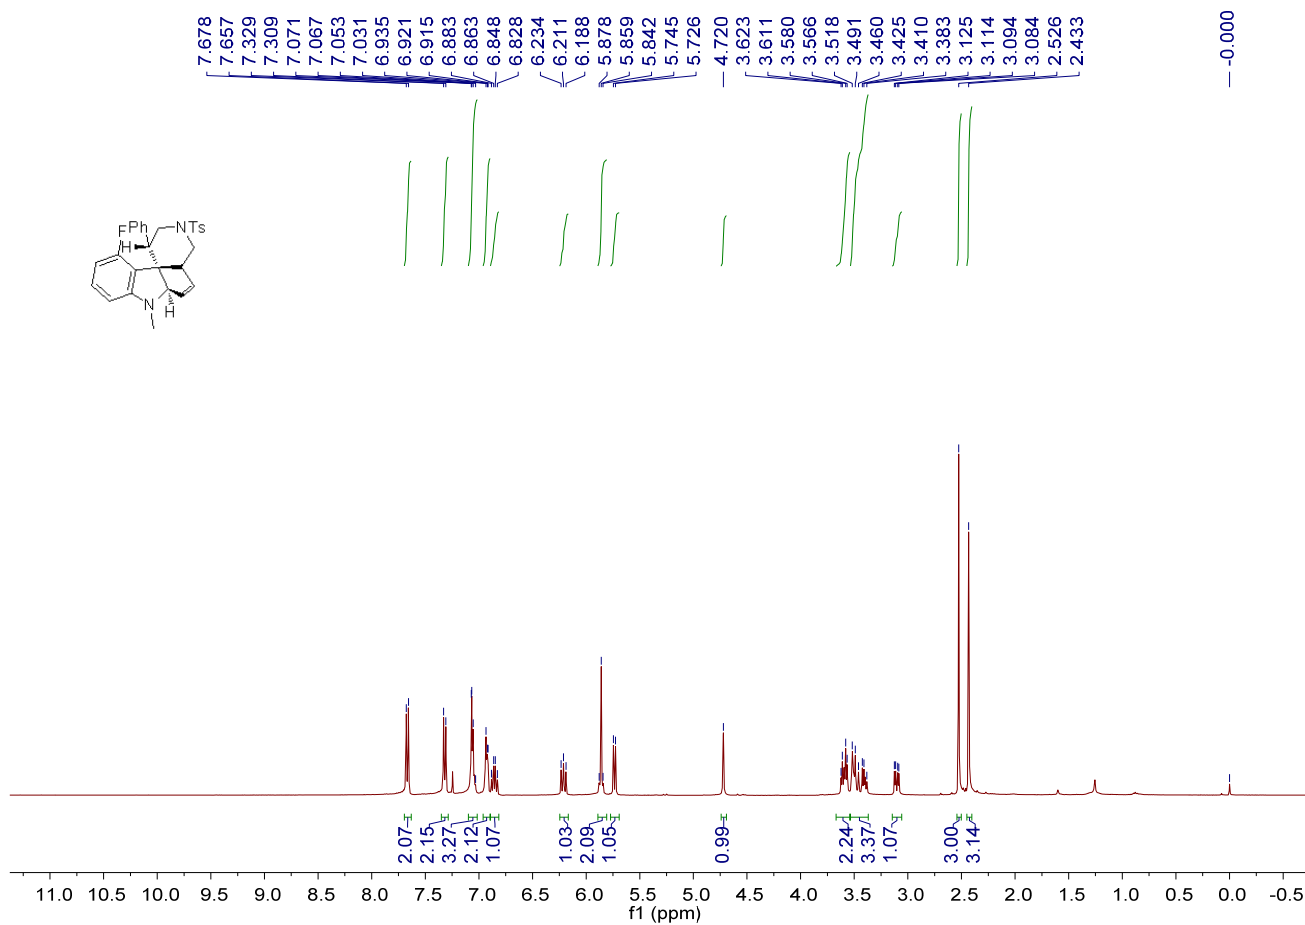



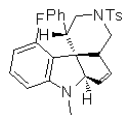

- 161.005
- 158.594
- 152.045
- 151.949
- 143.424
- 138.175
- 135.095
- 133.963
- 130.133
- 130.037
- 129.679
- 129.242
- 127.883
- 127.528
- 127.410
- 127.075
- 118.401
- 118.237
- 103.520
- 103.310
- 101.860
- 101.837
- 77.318
- 77.000
- 76.682
- 73.862
- 56.710
- 56.685
- 51.474
- 46.807
- 46.317
- 43.217
- 32.295
- 21.508

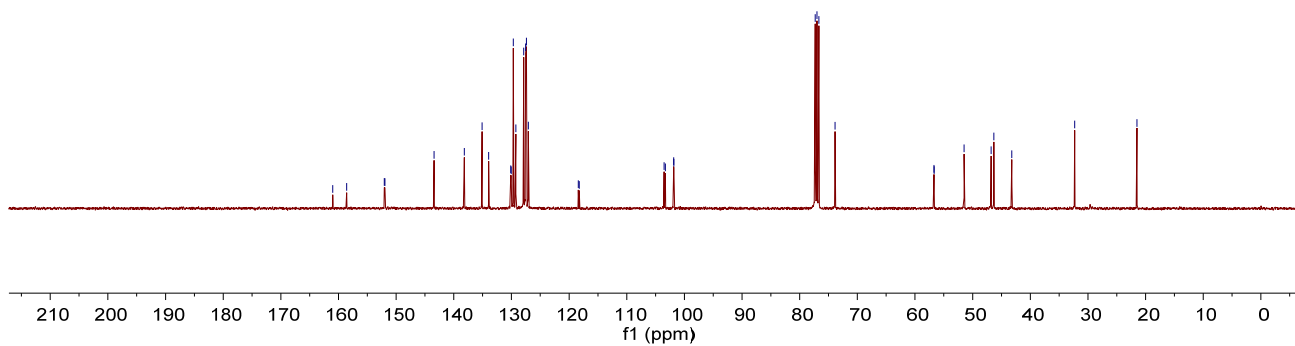

- 122.389
- 122.408
- 122.428

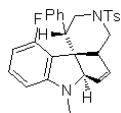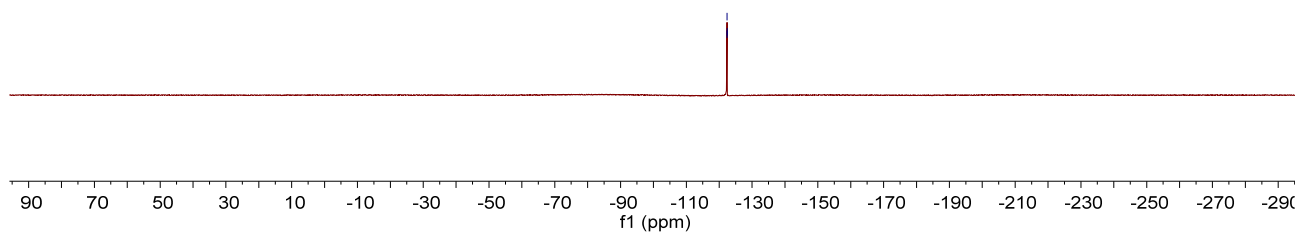

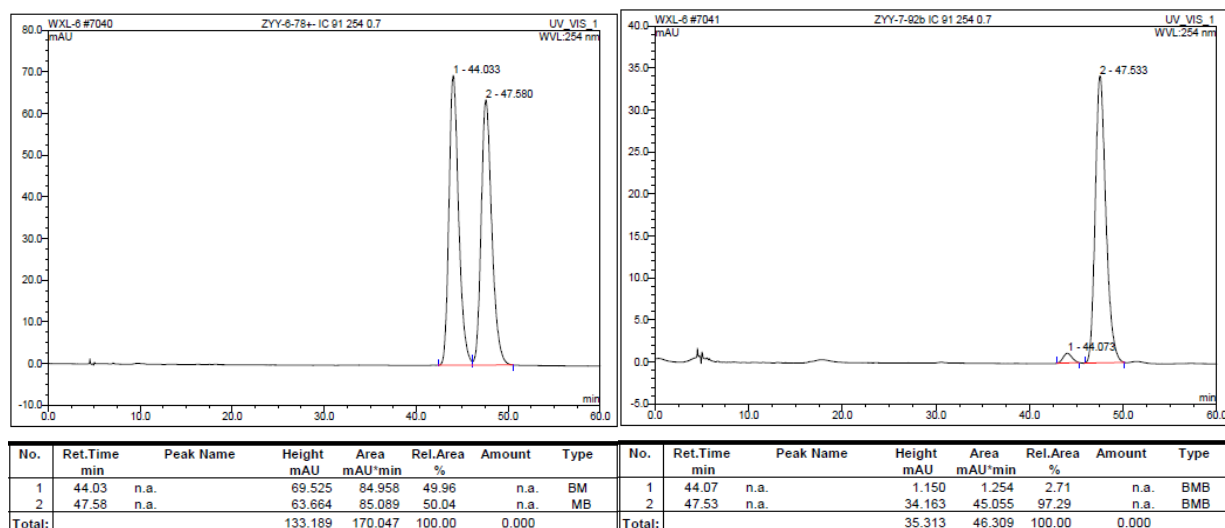

Translation: Chiralcel IC column [ $\lambda = 254$  nm; eluent: Hexane/Isopropanol = 90/10; Flow rate: 0.70 mL/min;  $t_{\text{minor}} = 44.07$  min,  $t_{\text{major}} = 47.53$  min; ee% = 95%].

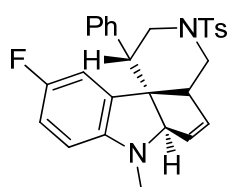

**(1*S*,4*aR*,6*aR*,11*bS*)-10-fluoro-7-methyl-1-phenyl-3-tosyl-2,3,4,4*a*,6*a*,7-hexahydro-1*H*-pyrido[4',3':2,3]cyclopenta[1,2-*b*]indole 2f**

A white solid, 49% yield (23.3 mg). M.p.: 142-145 °C.  $^1\text{H}$  NMR ( $\text{CDCl}_3$ , TMS, 400 MHz)  $\delta$  2.35 (s, 3H), 2.45 (dd,  $J = 12.0, 8.8$  Hz, 1H), 2.46 (s, 3H), 3.04 (dd,  $J = 12.0, 12.0$  Hz, 1H), 3.14-3.21 (m, 2H), 3.68 (dd,  $J = 12.0, 4.8$  Hz, 1H), 3.92 (dd,  $J = 12.0, 6.0$  Hz, 1H), 4.48 (s, 1H), 5.71 (d,  $J = 5.6$  Hz, 1H), 5.82-5.87 (m, 2H), 6.63-6.69 (m, 1H), 6.73-6.78 (m, 3H), 7.02-7.11 (m, 3H), 7.35 (d,  $J = 8.0$  Hz, 2H), 7.68 (d,  $J = 8.0$  Hz, 2H).  $^{13}\text{C}$  NMR ( $\text{CDCl}_3$ , 100 MHz, TMS)  $\delta$  21.5, 32.7, 47.5, 47.6, 50.2, 50.6, 57.5, 73.3, 106.2 (d,  $J = 8.0$  Hz), 110.2 (d,  $J = 23.8$  Hz), 114.5 (d,  $J = 22.8$  Hz), 126.9, 127.5, 127.6, 127.7, 129.0, 129.8, 133.9, 136.2 (d,  $J = 7.1$  Hz), 138.3, 143.7, 146.3, 155.4 (d,  $J = 232.3$  Hz).  $^{19}\text{F}$  NMR ( $\text{CDCl}_3$ , 376 MHz,  $\text{CFCl}_3$ )  $\delta$  -128.3. IR ( $\text{CH}_2\text{Cl}_2$ )  $\nu$  3029, 2920, 2849, 1646, 1492, 1337, 1164, 988, 960, 860, 771, 658  $\text{cm}^{-1}$ . MS (ESI)  $m/z$  (%): 475.18 (100)  $[\text{M}+\text{H}]^+$ ; HRMS (DART) Calcd. For  $\text{C}_{28}\text{H}_{28}\text{N}_2\text{O}_2\text{FS}^+ [\text{M}+\text{H}]^+$  requires 475.1850, found: 475.1846. Enantiomeric excess was determined by HPLC with a Chiralcel IC column [ $\lambda = 254$  nm; eluent: Hexane/Isopropanol = 86/14; Flow rate: 0.70 mL/min;  $t_{\text{minor}} = 87.93$  min,  $t_{\text{major}} = 53.11$  min; ee% = 99%;  $[\alpha]_{\text{D}}^{25} = -80.1$  (c 0.20,  $\text{CH}_2\text{Cl}_2$ )].

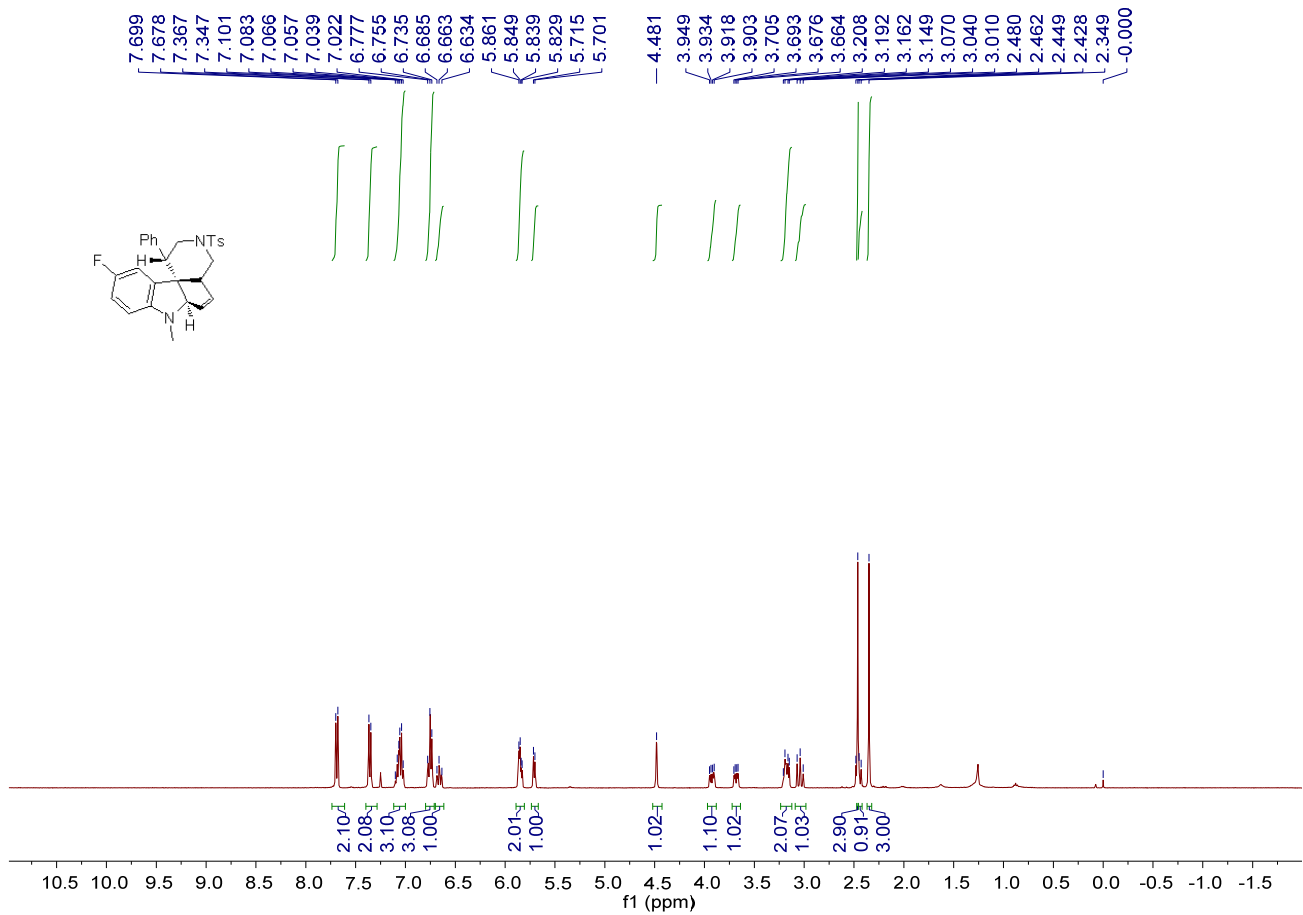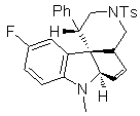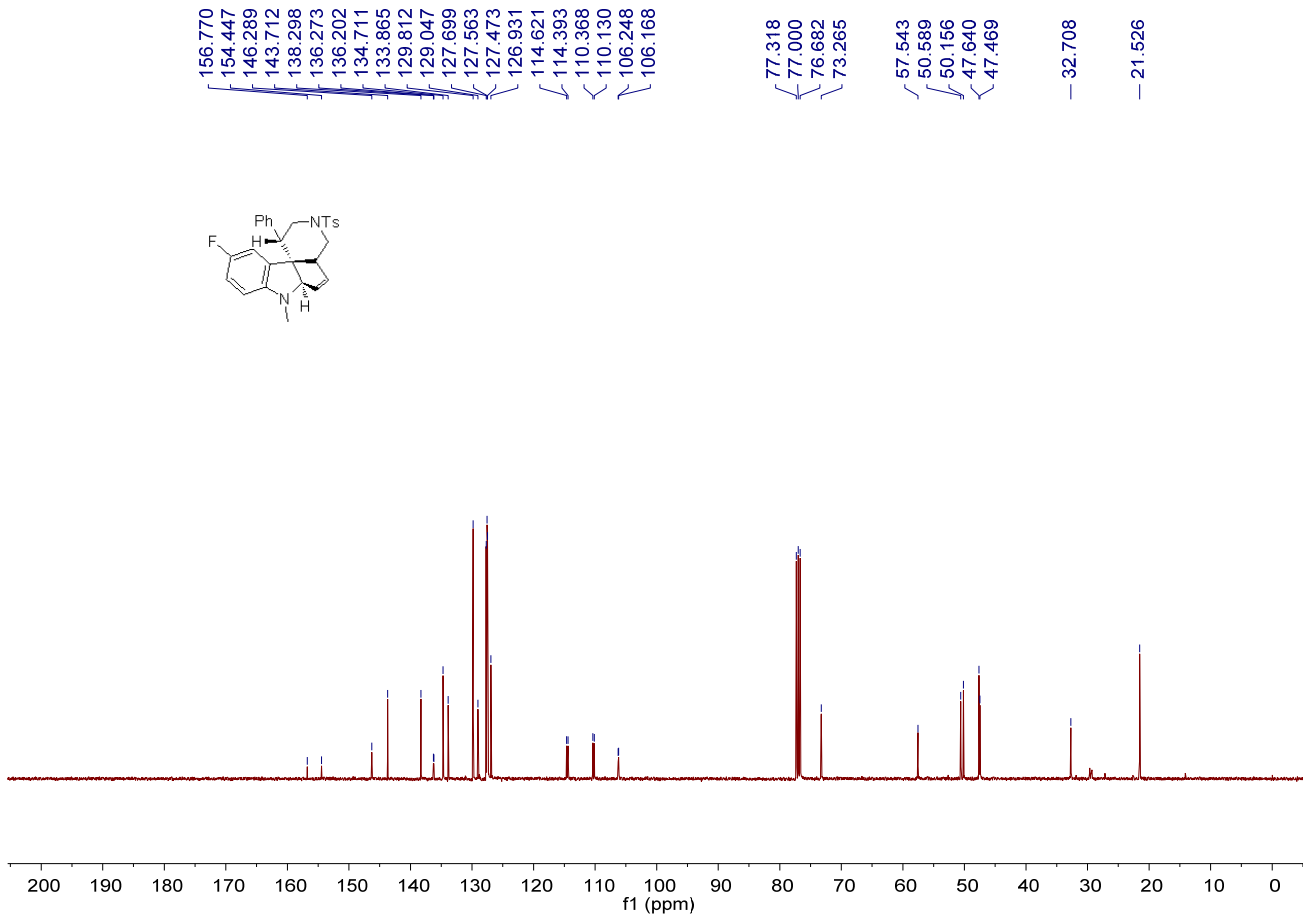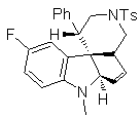

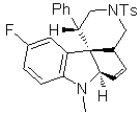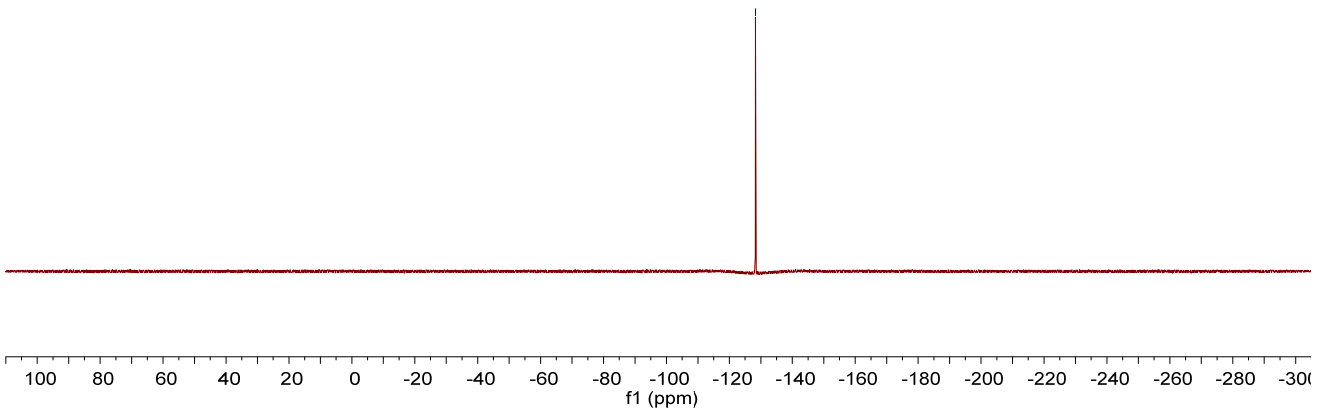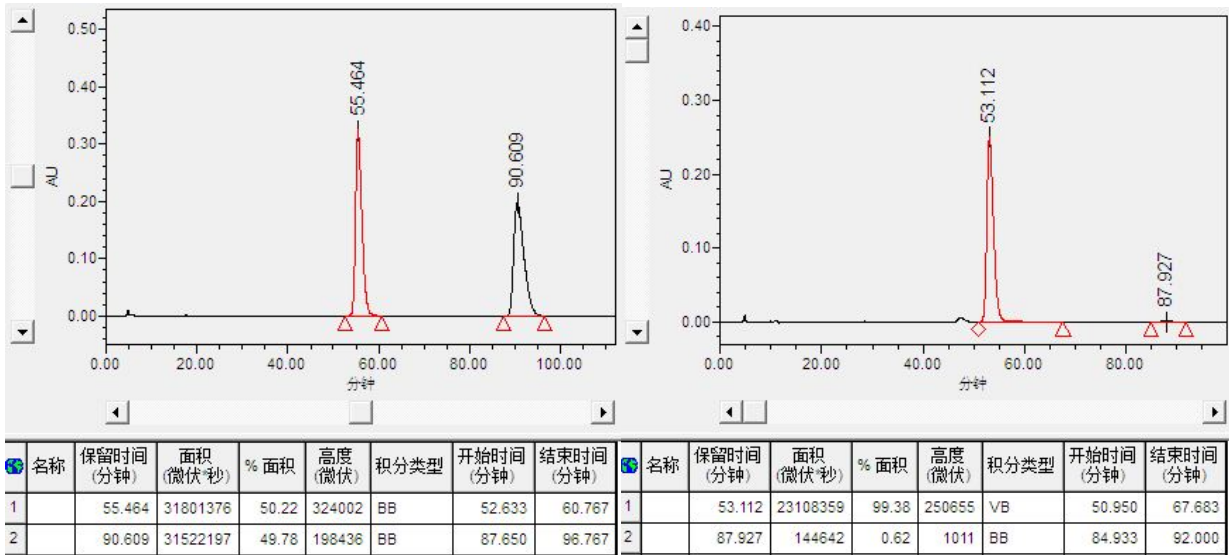

Translation: Chiralcel IC column [ $\lambda = 254 \text{ nm}$ ; eluent: Hexane/Isopropanol = 86/14; Flow rate: 0.70 mL/min;  $t_{\text{minor}} = 87.93 \text{ min}$ ,  $t_{\text{major}} = 53.11 \text{ min}$ ; ee% = 99%].

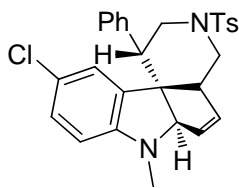

**(1S,4aR,6aR,11bS)-10-chloro-7-methyl-1-phenyl-3-tosyl-2,3,4,4a,6a,7-hexahydro-1H-pyrido[4',3':2,3]cyclopenta[1,2-b]indole 2g**

A white solid, 45% yield (22.1 mg). M.p.: 183-186 °C. <sup>1</sup>H NMR (CDCl<sub>3</sub>, TMS, 400 MHz) δ 2.36 (s, 3H), 2.42-2.47 (m, 4H), 3.05 (dd, *J* = 12.0, 12.0 Hz, 1H), 3.12-3.21 (m, 2H), 3.69 (dd, *J* = 11.2, 4.4 Hz, 1H), 3.94 (dd, *J* = 12.4, 6.0 Hz, 1H), 4.48 (s, 1H), 5.68 (d, *J* = 6.0 Hz, 1H), 5.82-5.88 (m, 2H), 6.72-6.75 (m, 2H), 6.88-6.95 (m, 2H), 7.02-7.11 (m, 3H), 7.35 (d, *J* = 8.0 Hz, 2H), 7.69 (d, *J* = 8.0 Hz, 2H). <sup>13</sup>C NMR (CDCl<sub>3</sub>, 100 MHz, TMS) δ 21.6, 32.0, 47.5, 47.6, 50.2, 50.3, 57.5, 73.1, 106.6, 120.6, 123.0, 126.9, 127.48, 127.52, 127.6, 128.3, 128.7, 129.8, 134.0, 134.9, 136.7, 138.2, 143.7, 148.4. IR (CH<sub>2</sub>Cl<sub>2</sub>) ν 2923, 1597, 1492, 1342, 1153, 1058, 935, 814, 730, 658 cm<sup>-1</sup>. MS (ESI) *m/z* (%): 491.15 (100) [M+H]<sup>+</sup>; HRMS (ESI) Calcd. For C<sub>28</sub>H<sub>28</sub>N<sub>2</sub>O<sub>2</sub>ClS<sup>+</sup>[M+H]<sup>+</sup> requires 491.1555, found: 491.1552. Enantiomeric excess was determined by HPLC with a Chiralcel IC column [λ = 254 nm; eluent: Hexane/Isopropanol = 80/20; Flow rate: 0.70 mL/min; *t*<sub>minor</sub> = 45.89 min, *t*<sub>major</sub> = 35.44 min; ee% = 98%; [α]<sub>D</sub><sup>25</sup> = -111.1 (c 0.12, CH<sub>2</sub>Cl<sub>2</sub>)].

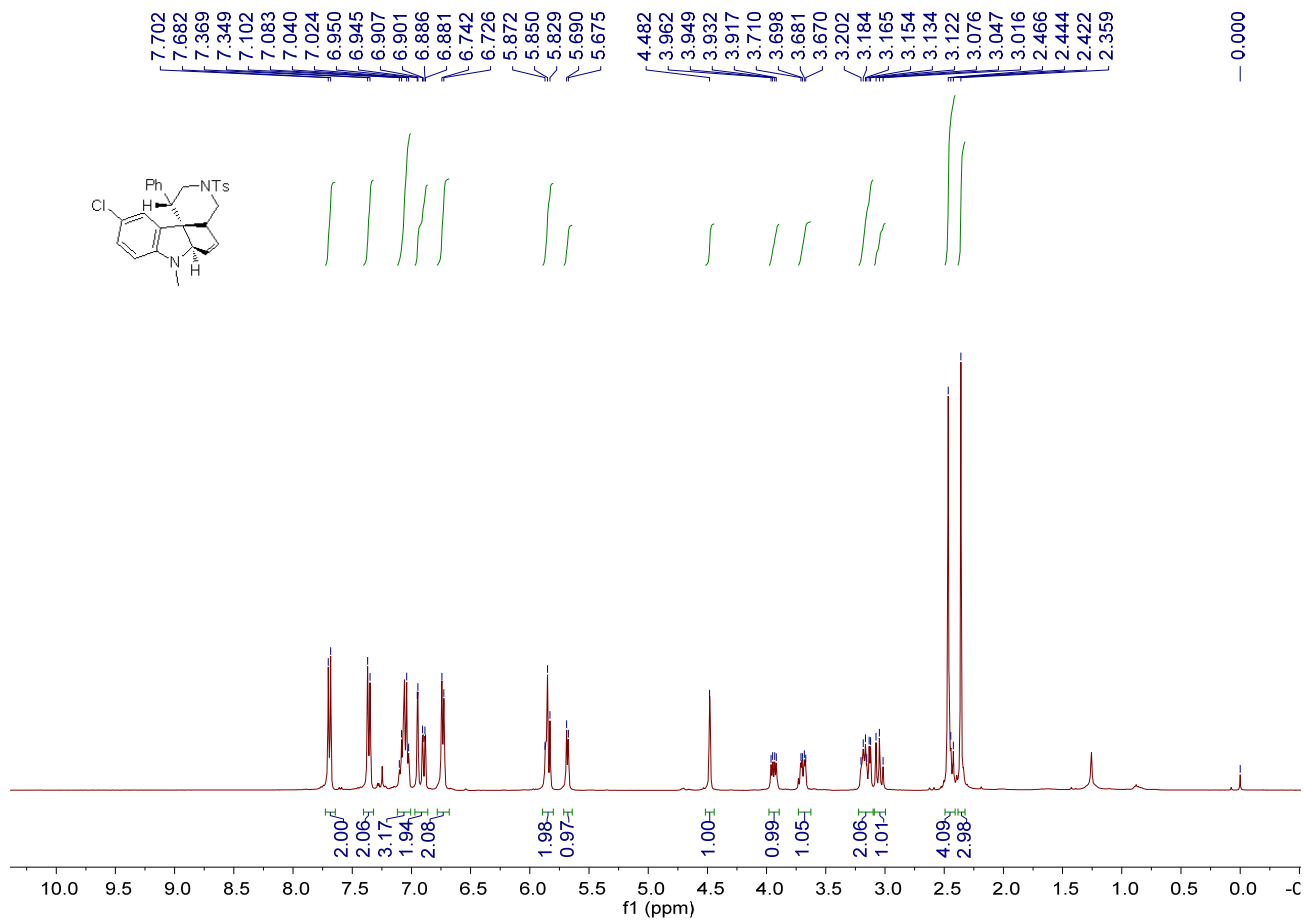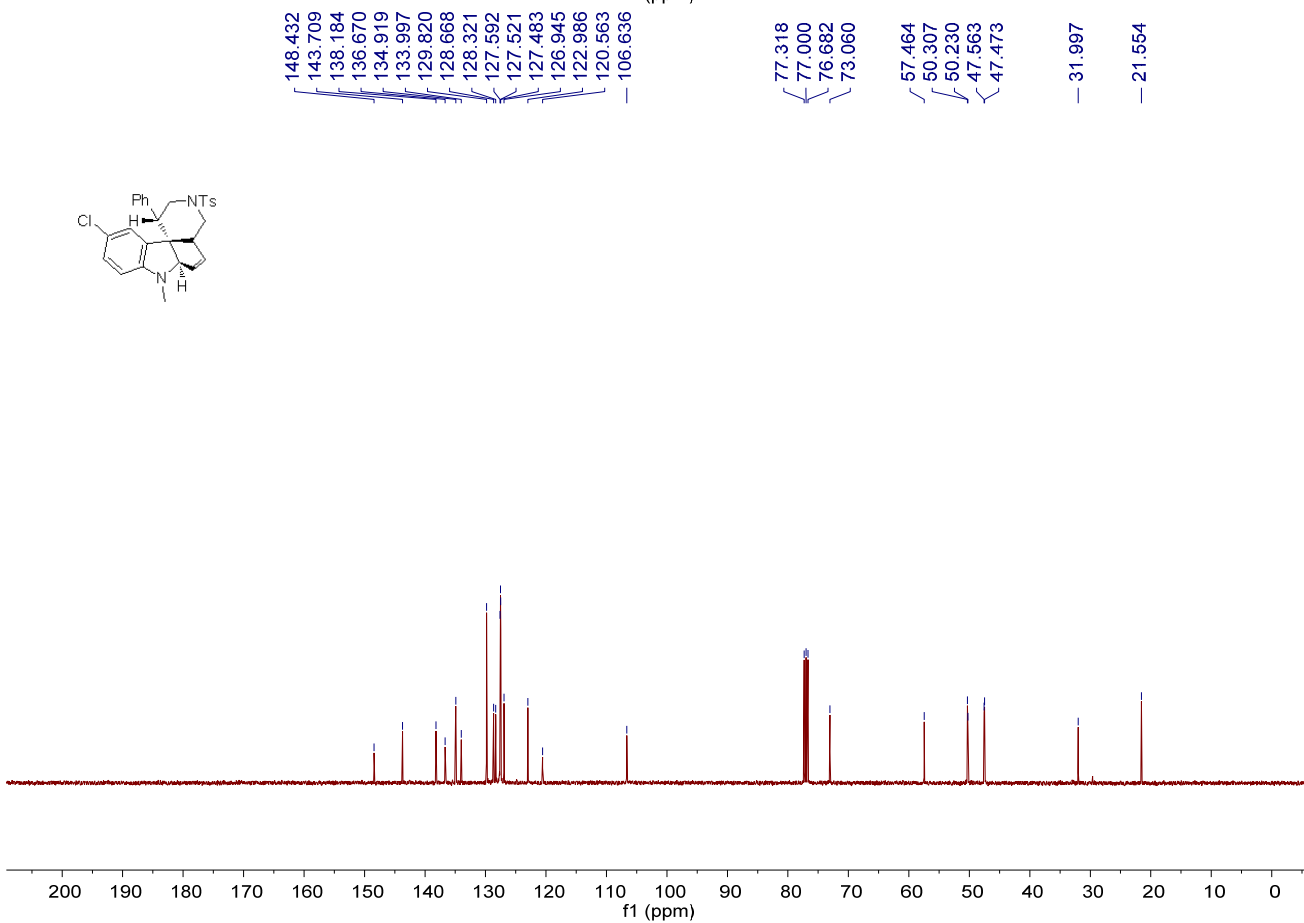

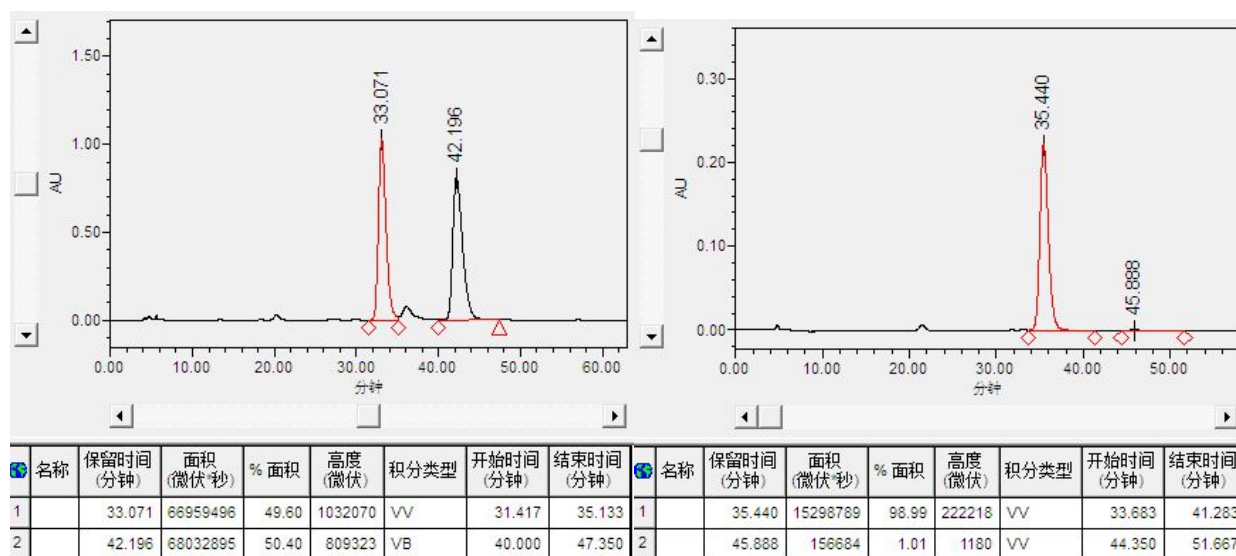

Translation: Chiralcel IC column [ $\lambda = 254$  nm; eluent: Hexane/Isopropanol = 80/20; Flow rate: 0.70 mL/min;  $t_{\text{minor}} = 45.89$  min,  $t_{\text{major}} = 35.44$  min; ee% = 98%].

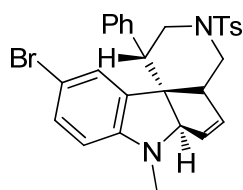

**(1*S*,4*aR*,6*aR*,11*bS*)-10-bromo-7-methyl-1-phenyl-3-tosyl-2,3,4,4*a*,6*a*,7-hexahydro-1*H*-pyrido[4',3':2,3]cyclopenta[1,2-*b*]indole 2h**

A white solid, 47% yield (24.9 mg). M.p.: 199-202 °C.  $^1\text{H}$  NMR ( $\text{CDCl}_3$ , TMS, 400 MHz)  $\delta$  2.37 (s, 3H), 2.44-2.50 (m, 4H), 3.06 (dd,  $J = 12.0, 12.0$  Hz, 1H), 3.12-3.22 (m, 2H), 3.69 (dd,  $J = 10.8, 4.0$  Hz, 1H), 3.93 (dd,  $J = 12.0, 6.0$  Hz, 1H), 4.48 (s, 1H), 5.69 (d,  $J = 6.0$  Hz, 1H), 5.81 (d,  $J = 8.0$  Hz, 1H), 5.86-5.89 (m, 1H), 6.72-6.75 (m, 2H), 7.02-7.11 (m, 5H), 7.36 (d,  $J = 8.0$  Hz, 2H), 7.69 (d,  $J = 8.0$  Hz, 2H).  $^{13}\text{C}$  NMR ( $\text{CDCl}_3$ , 100 MHz, TMS)  $\delta$  21.6, 31.9, 47.5, 47.6, 50.2, 50.4, 57.5, 73.1, 107.3, 107.5, 125.8, 127.0, 127.5, 127.6, 127.7, 128.7, 129.9, 131.3, 134.1, 135.0, 137.2, 138.2, 143.7, 148.8. IR ( $\text{CH}_2\text{Cl}_2$ )  $\nu$  2918, 2852, 1595, 1481, 1343, 1169, 938, 861, 730, 658  $\text{cm}^{-1}$ . MS (ESI)  $m/z$  (%): 535.10 (100)  $[\text{M}+\text{H}]^+$ ; HRMS (DART) Calcd. For  $\text{C}_{28}\text{H}_{28}\text{N}_2\text{O}_2\text{BrS}^+[\text{M}+\text{H}]^+$  requires 535.1049, found: 535.1048. Enantiomeric excess was determined by HPLC with a Chiralcel IC column [ $\lambda = 214$  nm; eluent: Hexane/Isopropanol = 70/30; Flow rate: 0.70 mL/min;  $t_{\text{minor}} = 30.13$  min,  $t_{\text{major}} = 24.97$  min; ee% = 91%;  $[\alpha]_{\text{D}}^{25} = -111.1$  (c 0.30,  $\text{CH}_2\text{Cl}_2$ )].

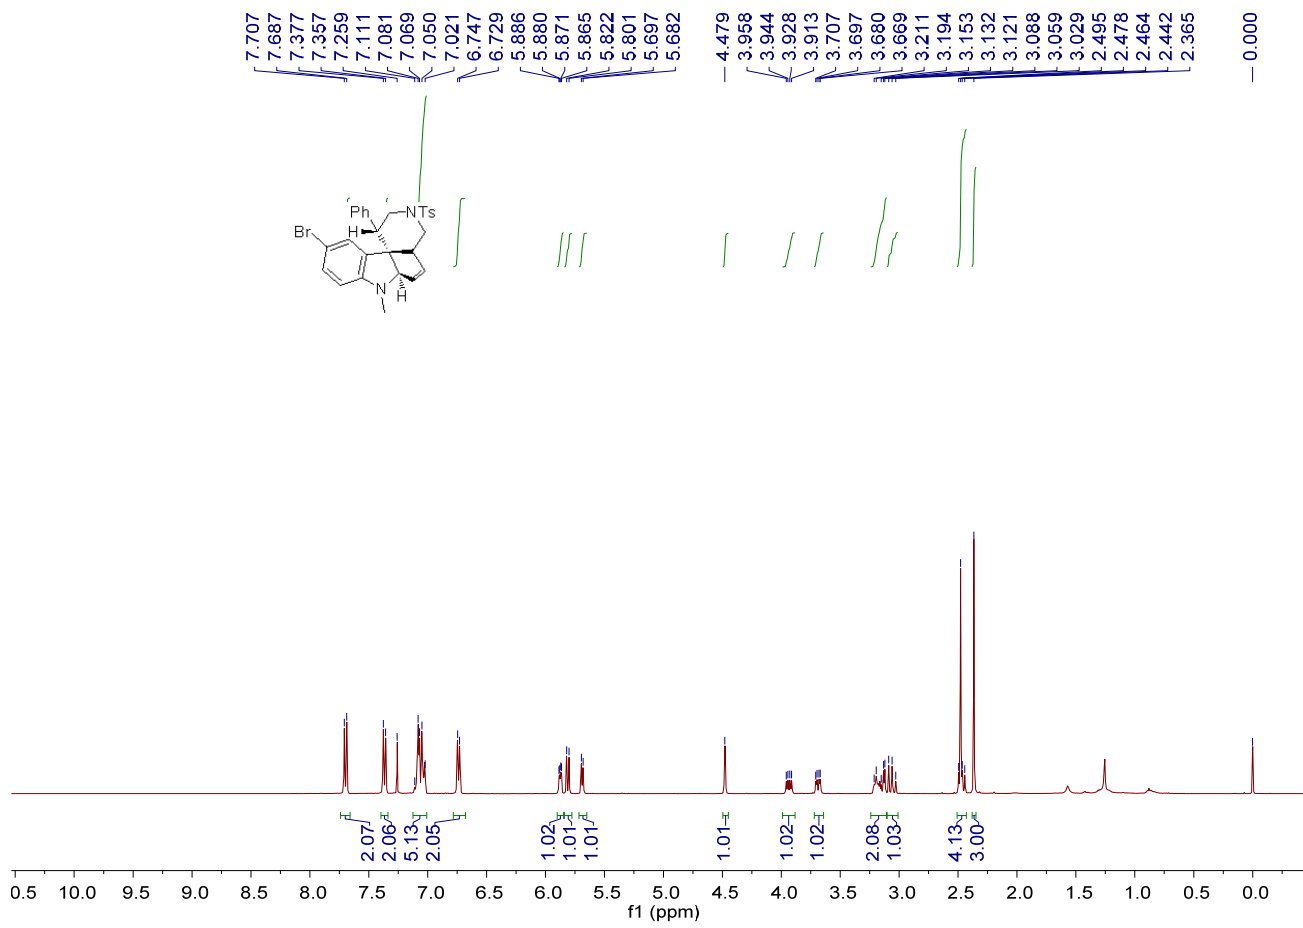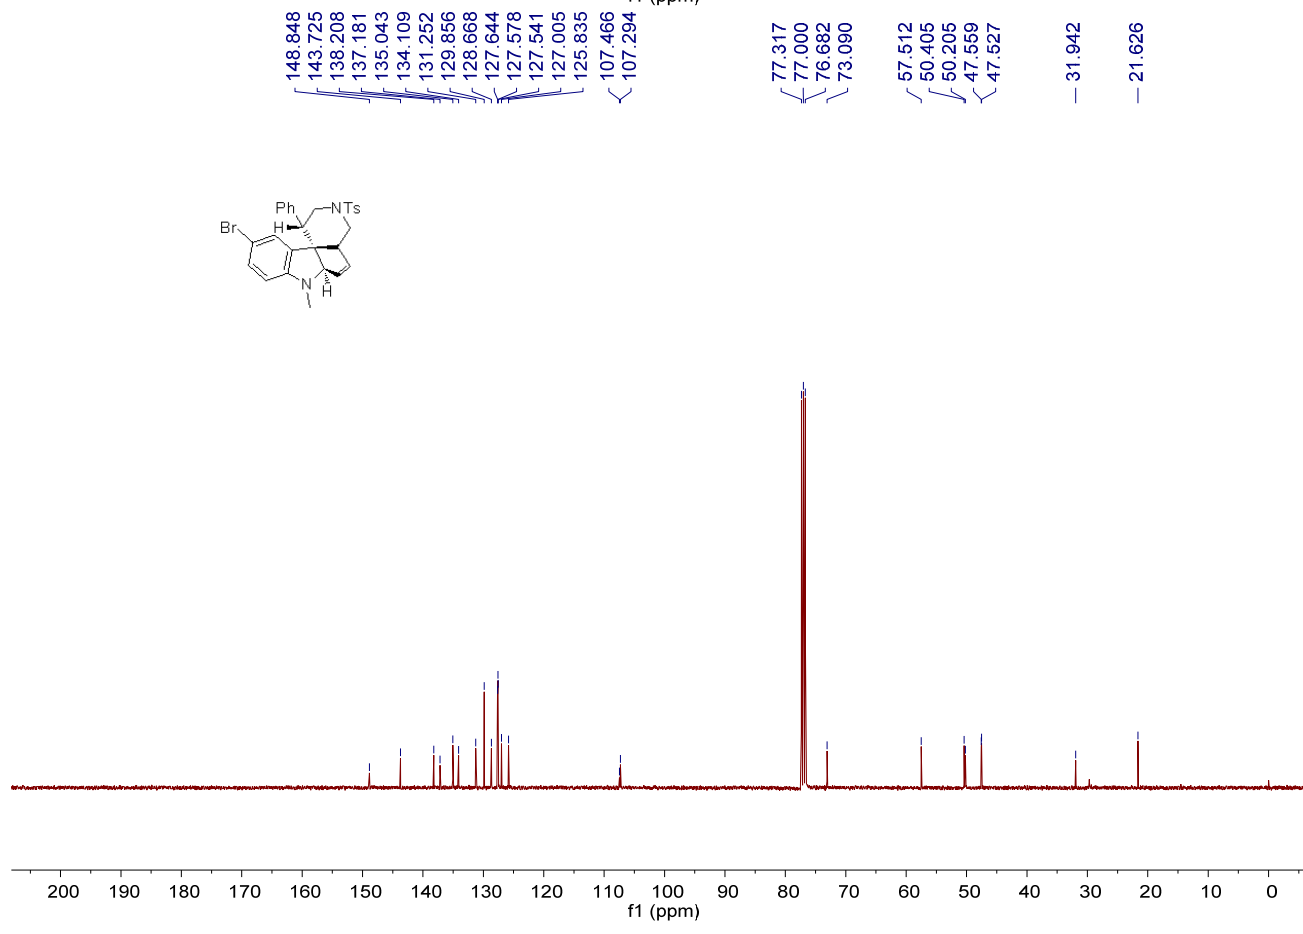



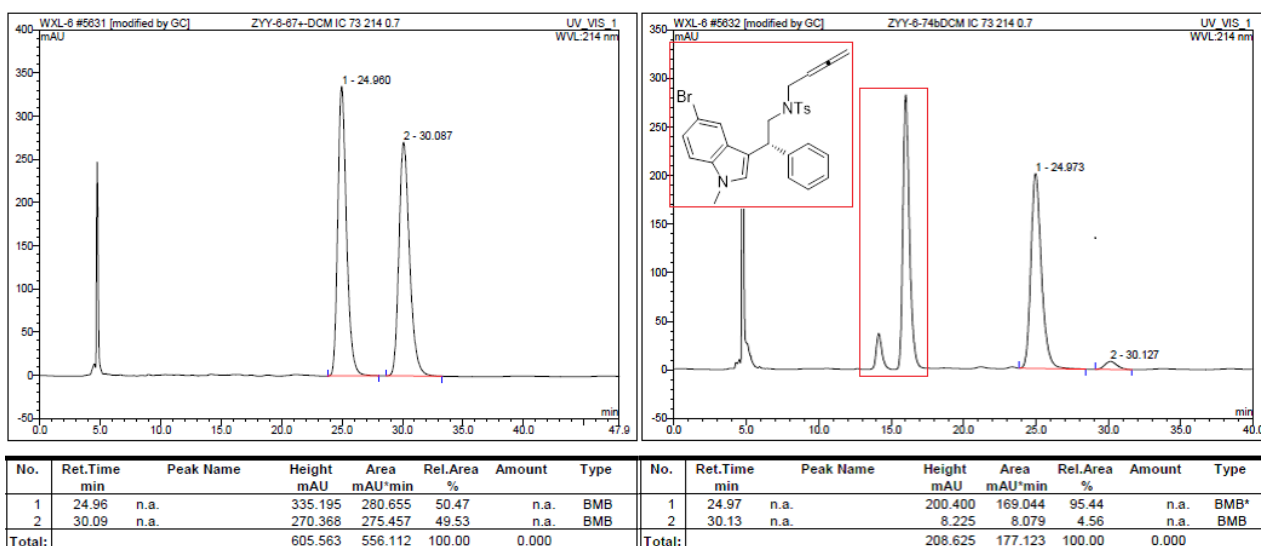

Translation: Chiralcel IC column [ $\lambda = 214$  nm; eluent: Hexane/Isopropanol = 70/30; Flow rate: 0.70 mL/min;  $t_{\text{minor}} = 30.13$  min,  $t_{\text{major}} = 24.97$  min; ee% = 91%]. (Note: In the 5 minute position, there is the peak of dichloromethane, due to that the sample was dissolved in dichloromethane for measuring).

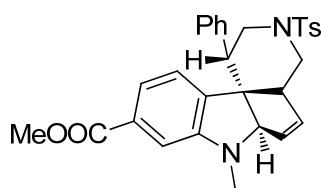

**(1*S*,4*aR*,6*aR*,11*bS*)-methyl 7-methyl-1-phenyl-3-tosyl-2,3,4,4*a*,6*a*,7-hexahydro-1*H*-pyrido[4',3':2,3]cyclopenta[1,2-*b*]indole-9-carboxylate **2i****

A white solid, 48% yield (24.6 mg). M.p.: 142-145 °C.  $^1\text{H}$  NMR ( $\text{CDCl}_3$ , TMS, 400 MHz)  $\delta$  2.40-2.44 (m, 1H), 2.45 (s, 3H), 2.46 (s, 3H), 3.02 (dd,  $J = 12.0, 12.0$  Hz, 1H), 3.20-3.29 (m, 2H), 3.67 (dd,  $J = 11.6, 4.8$  Hz, 1H), 3.83 (s, 3H), 3.93 (dd,  $J = 12.4, 6.0$  Hz, 1H), 4.53 (s, 1H), 5.69-5.72 (m, 1H), 5.86-5.89 (m, 1H), 6.58-6.59 (m, 1H), 6.70-6.72 (m, 2H), 6.99-7.14 (m, 4H), 7.33-7.37 (m, 3H), 7.68 (d,  $J = 8.0$  Hz, 2H).  $^{13}\text{C}$  NMR ( $\text{CDCl}_3$ , 100 MHz, TMS)  $\delta$  21.5, 31.8, 47.6, 47.7, 50.3, 50.5, 51.8, 57.5, 73.0, 106.3, 118.6, 122.5, 127.0, 127.53, 127.55, 127.57, 128.7, 129.8, 130.6, 133.7, 135.0, 138.1, 140.3, 143.7, 149.9, 167.5. IR ( $\text{CH}_2\text{Cl}_2$ )  $\nu$  2918, 2847, 1712, 1496, 1345, 1164, 1090, 931, 859, 730, 662  $\text{cm}^{-1}$ . MS (ESI)  $m/z$  (%): 515.19 (100)  $[\text{M}+\text{H}]^+$ ; HRMS (ESI) Calcd. For  $\text{C}_{30}\text{H}_{31}\text{N}_2\text{O}_4\text{S}^+[\text{M}+\text{H}]^+$  requires 515.1999, found: 515.1990. Enantiomeric excess was determined by HPLC with a Chiralcel IA column [ $\lambda = 214$  nm; eluent: Hexane/Isopropanol = 90/10; Flow rate: 0.70 mL/min;  $t_{\text{minor}} = 39.07$  min,  $t_{\text{major}} = 35.57$  min; ee% = 98%;  $[\alpha]_{\text{D}}^{25} = -43.0$  (c 0.10,  $\text{CH}_2\text{Cl}_2$ )].

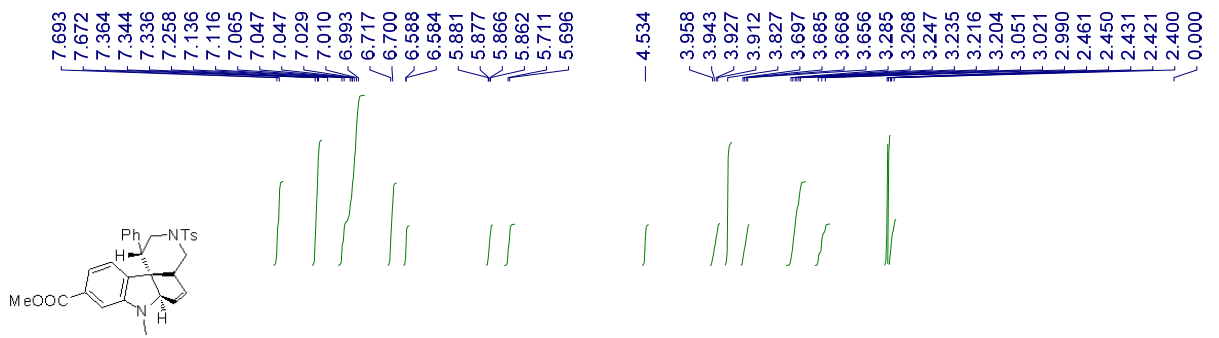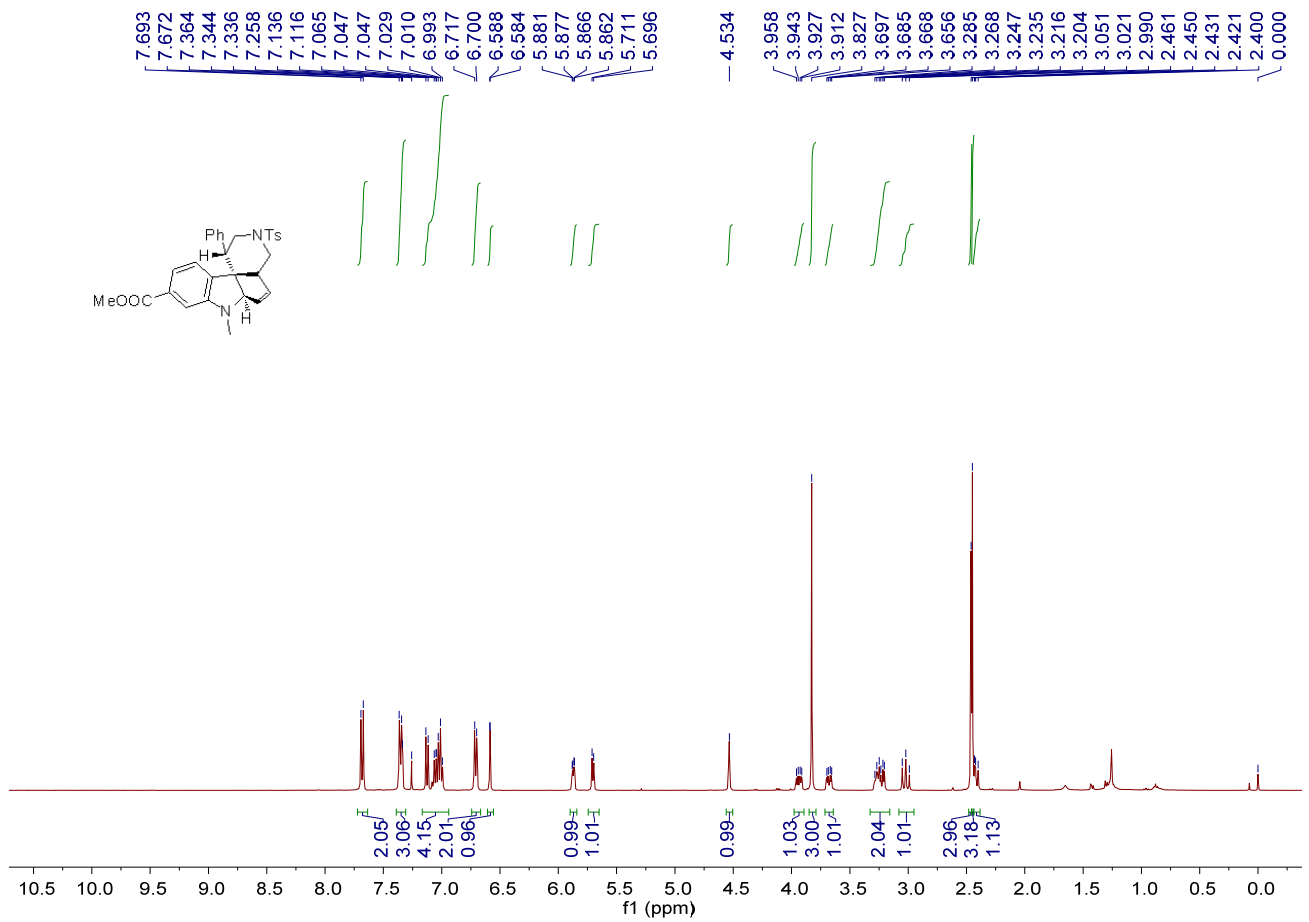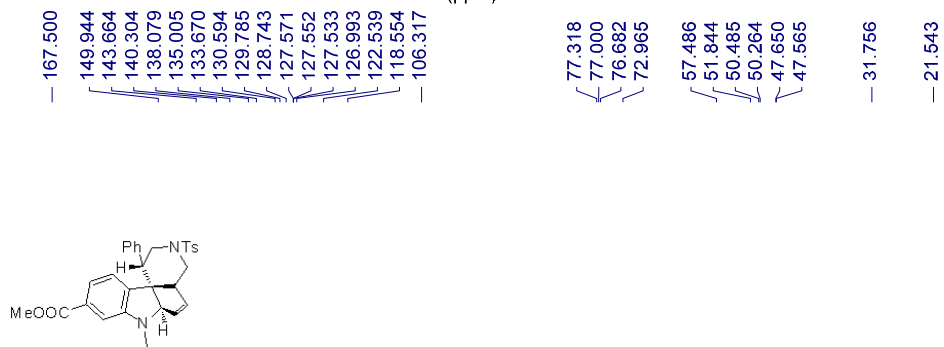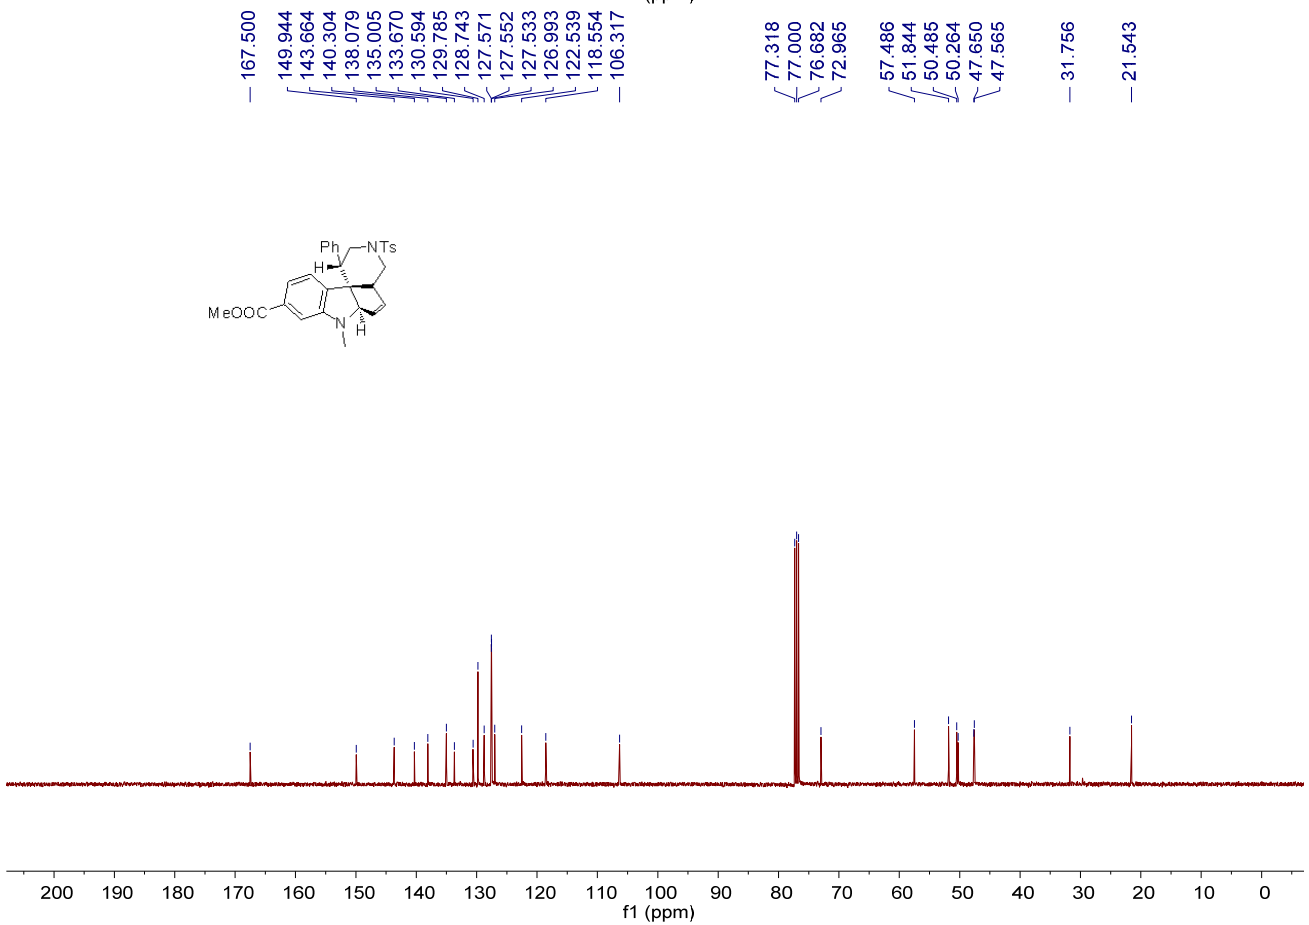

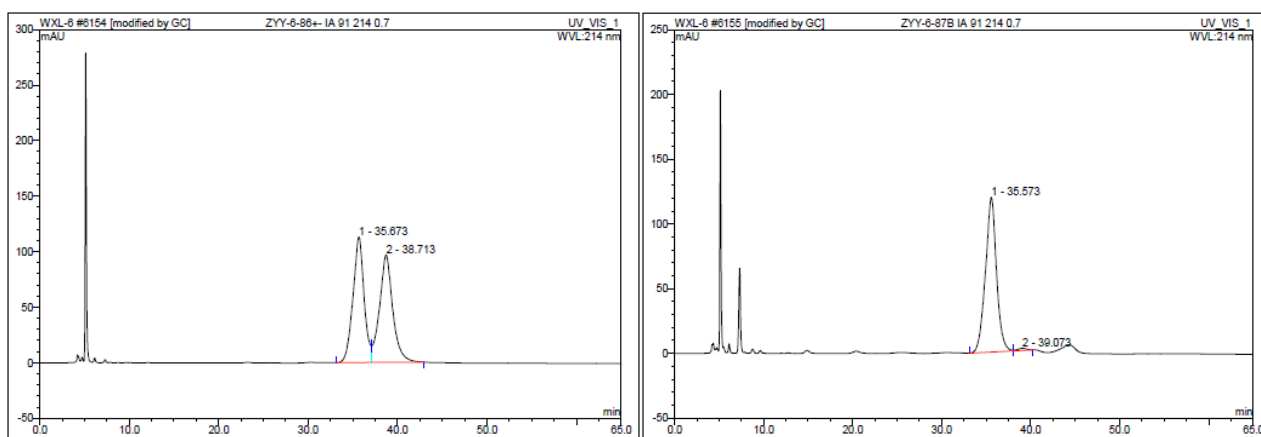

| No.    | Ret.Time min | Peak Name | Height mAU | Area mAU*min | Rel.Area % | Amount | Type | No.    | Ret.Time min | Peak Name | Height mAU | Area mAU*min | Rel.Area % | Amount | Type |
|--------|--------------|-----------|------------|--------------|------------|--------|------|--------|--------------|-----------|------------|--------------|------------|--------|------|
| 1      | 35.67        | n.a.      | 113.031    | 162.898      | 49.46      | n.a.   | BM   | 1      | 35.57        | n.a.      | 119.474    | 172.299      | 98.91      | n.a.   | BM   |
| 2      | 38.71        | n.a.      | 96.574     | 166.444      | 50.54      | n.a.   | MB   | 2      | 39.07        | n.a.      | 1.590      | 1.895        | 1.09       | n.a.   | MB   |
| Total: |              |           | 209.605    | 329.342      | 100.00     | 0.000  |      | Total: |              |           | 121.064    | 174.194      | 100.00     | 0.000  |      |

Translation: Chiralcel IA column [ $\lambda = 214$  nm; eluent: Hexane/Isopropanol = 90/10; Flow rate: 0.70 mL/min;  $t_{\text{minor}} = 39.07$  min,  $t_{\text{major}} = 35.57$  min; ee% = 98%]. (Note: In the 5 minute position, there is the peak of dichloromethane, due to that the sample was dissolved in dichloromethane for measuring).

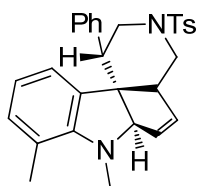

**(1S,4aR,6aR,11bS)-7,8-dimethyl-1-phenyl-3-tosyl-2,3,4,4a,6a,7-hexahydro-1H-pyrido[4',3':2,3]cyclopenta[1,2-b]indole 2j**

A white solid, 46% yield (21.6 mg). M.p.: 85-88 °C.  $^1\text{H}$  NMR ( $\text{CDCl}_3$ , TMS, 400 MHz)  $\delta$  2.01 (s, 3H), 2.07 (s, 3H), 2.36 (dd,  $J = 12.0, 8.8$  Hz, 1H), 2.46 (s, 3H), 2.94 (dd,  $J = 12.0, 12.0$  Hz, 1H), 3.24-3.30 (m, 2H), 3.75 (dd,  $J = 11.6, 4.8$  Hz, 1H), 3.99 (dd,  $J = 12.0, 6.0$  Hz, 1H), 4.12 (s, 1H), 5.62 (d,  $J = 5.6$  Hz, 1H), 5.71-5.74 (m, 1H), 6.60-6.63 (m, 2H), 6.71-6.76 (m, 1H), 6.80-6.82 (m, 1H), 6.98-7.01 (m, 1H), 7.04-7.07 (m, 3H), 7.35 (d,  $J = 8.0$  Hz, 2H), 7.69 (d,  $J = 8.0$  Hz, 2H).  $^{13}\text{C}$  NMR ( $\text{CDCl}_3$ , 100 MHz, TMS)  $\delta$  18.8, 21.5, 37.9, 47.6, 47.7, 50.5, 51.0, 58.8, 75.6, 119.4, 120.9, 121.2, 126.9, 127.6, 127.9, 129.8, 131.2, 132.0, 133.5, 133.7, 136.9, 139.3, 143.6, 149.2. IR ( $\text{CH}_2\text{Cl}_2$ )  $\nu$  2920, 1598, 1467, 1343, 1162, 1089, 937, 855, 744, 659  $\text{cm}^{-1}$ . MS (ESI)  $m/z$  (%): 471.20 (100)  $[\text{M}+\text{H}]^+$ ; HRMS (DART) Calcd. For  $\text{C}_{29}\text{H}_{31}\text{N}_2\text{O}_2\text{S}^+[\text{M}+\text{H}]^+$  requires 471.2101, found: 471.2097. Enantiomeric excess was determined by HPLC with a Chiralcel IC column [ $\lambda = 254$  nm; eluent: Hexane/Isopropanol = 90/10; Flow rate: 0.50 mL/min;  $t_{\text{minor}} = 78.59$  min,  $t_{\text{major}} = 85.21$  min; ee% = 97%;  $[\alpha]_{\text{D}}^{25} = -77.7$  (c 0.20,

CH<sub>2</sub>Cl<sub>2</sub>].

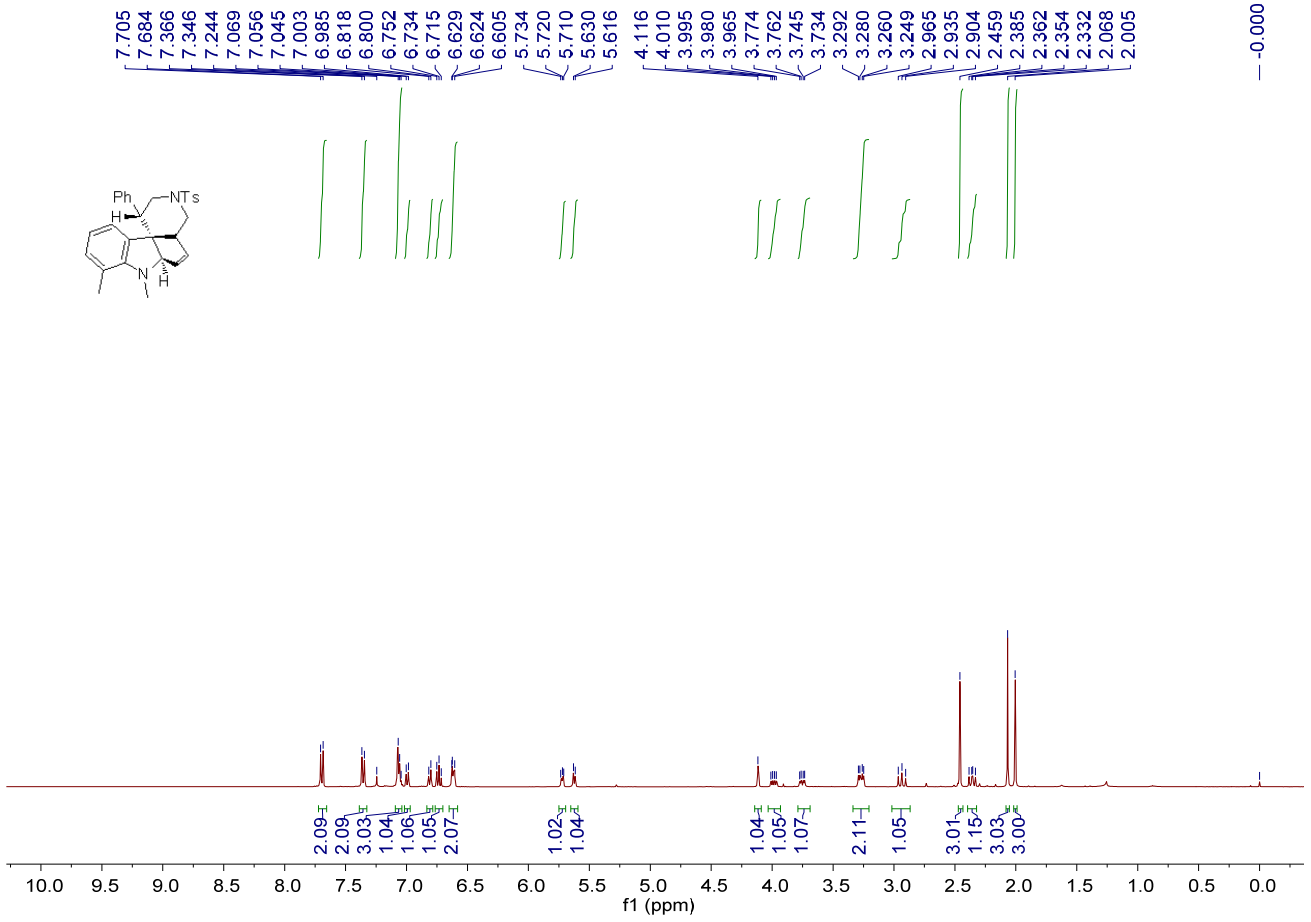

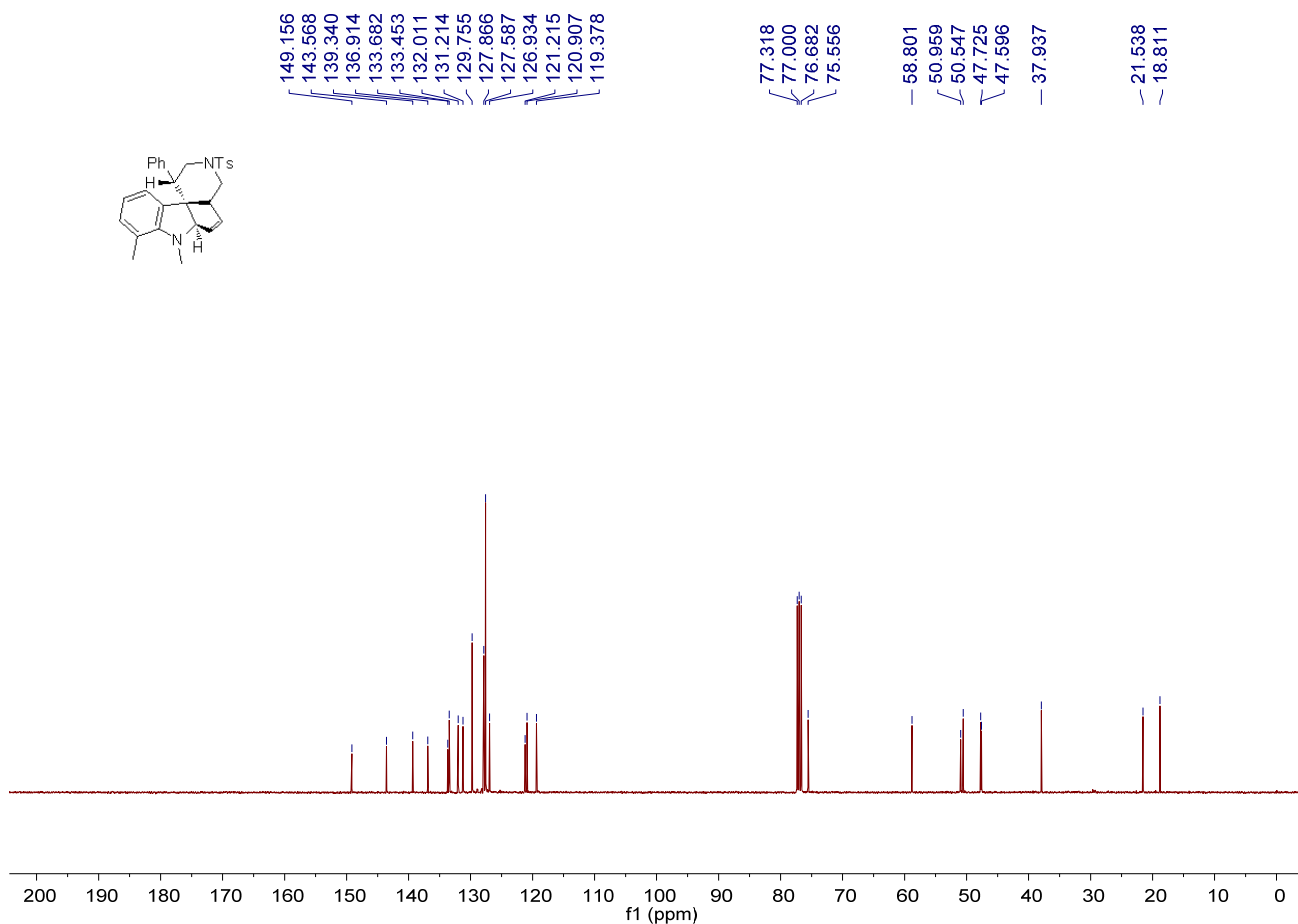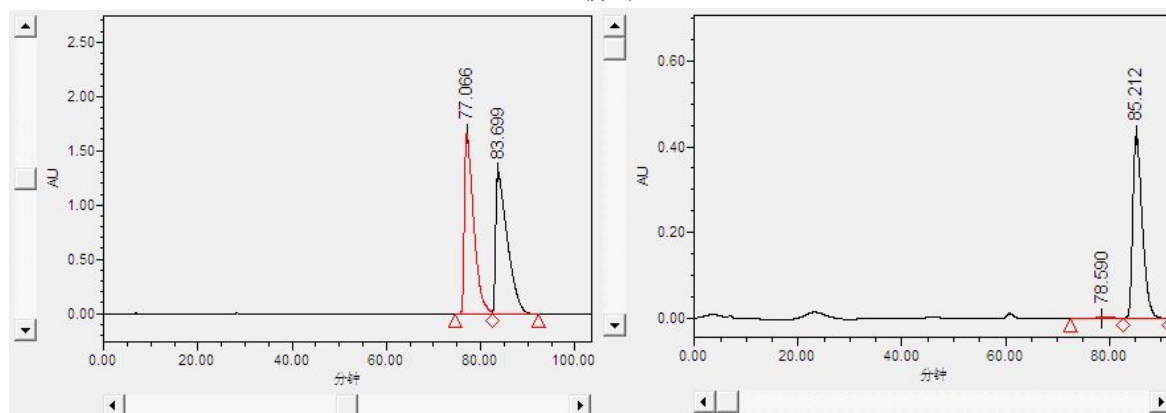

| 名称 | 保留时间 (分钟) | 面积 (微伏秒)  | % 面积  | 高度 (微伏) | 积分类型 | 开始时间 (分钟) | 结束时间 (分钟) | 名称 | 保留时间 (分钟) | 面积 (微伏秒) | % 面积  | 高度 (微伏) | 积分类型 | 开始时间 (分钟) | 结束时间 (分钟) |
|----|-----------|-----------|-------|---------|------|-----------|-----------|----|-----------|----------|-------|---------|------|-----------|-----------|
| 1  | 77.066    | 229961168 | 50.37 | 1667682 | BV   | 74.550    | 82.400    | 1  | 78.590    | 909522   | 1.62  | 2208    | BV   | 72.550    | 82.717    |
| 2  | 83.699    | 226541475 | 49.63 | 1310464 | VB   | 82.400    | 92.417    | 2  | 85.212    | 55271683 | 98.38 | 429778  | VV   | 82.717    | 91.417    |

Translation: Chiralcel IC column [ $\lambda = 254 \text{ nm}$ ; eluent: Hexane/Isopropanol = 90/10; Flow rate: 0.50 mL/min;  $t_{\text{minor}} = 78.59 \text{ min}$ ,  $t_{\text{major}} = 85.21 \text{ min}$ ; ee% = 97%].

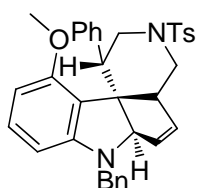

**(1*S*,4*aR*,6*aR*,11*bS*)-7-benzyl-11-methoxy-1-phenyl-3-tosyl-2,3,4,4*a*,6*a*,7-hexahydro-1*H*-pyrido[4',3':2,3]cyclopenta[1,2-*b*]indole 2k**

A white solid, 46% yield (25.9 mg). M.p.: 90-93 °C. <sup>1</sup>H NMR (CDCl<sub>3</sub>, TMS, 400 MHz) δ 2.43 (s, 3H), 3.02 (dd, *J* = 12.0, 4.8 Hz, 1H), 3.31 (dd, *J* = 12.0, 12.0 Hz, 1H), 3.50 (dd, *J* = 11.2, 5.2 Hz, 1H), 3.59-3.63 (m, 1H), 3.69 (dd, *J* = 12.0, 5.2 Hz, 1H), 3.85-4.01 (m, 6H), 4.59 (s, 1H), 5.65-5.68 (m, 2H), 5.75-5.77 (m, 1H), 6.22 (d, *J* = 8.4 Hz, 1H), 6.81-6.83 (m, 4H), 6.86-6.91 (m, 1H), 7.08-7.13 (m, 2H), 7.15-7.22 (m, 4H), 7.30 (d, *J* = 8.0 Hz, 2H), 7.66 (d, *J* = 8.0 Hz, 2H). <sup>13</sup>C NMR (CDCl<sub>3</sub>, 100 MHz, TMS) δ 21.5, 41.2, 45.8, 47.1, 50.7, 51.2, 55.1, 57.0, 72.3, 100.1, 100.7, 118.7, 126.7, 126.8, 127.3, 127.5, 127.7, 128.1, 128.3, 129.61, 129.64, 134.3, 135.8, 138.3, 139.1, 143.3, 151.2, 156.3. IR (CH<sub>2</sub>Cl<sub>2</sub>) ν 3028, 2919, 2842, 1599, 1494, 1338, 1166, 941, 859, 729, 662 cm<sup>-1</sup>. MS (ESI) *m/z* (%): 563.23 (100) [M+H]<sup>+</sup>; HRMS (DART) Calcd. For C<sub>35</sub>H<sub>35</sub>N<sub>2</sub>O<sub>3</sub>S<sup>+</sup>[M+H]<sup>+</sup> requires 563.2363, found: 563.2358. Enantiomeric excess was determined by HPLC with a Chiralcel IC column [λ = 214 nm; eluent: Hexane/Isopropanol = 85/15; Flow rate: 0.70 mL/min; *t*<sub>minor</sub> = 42.29 min, *t*<sub>major</sub> = 45.30 min; ee% = 99%; [α]<sub>D</sub><sup>25</sup> = -25.0 (c 0.70, CH<sub>2</sub>Cl<sub>2</sub>)].

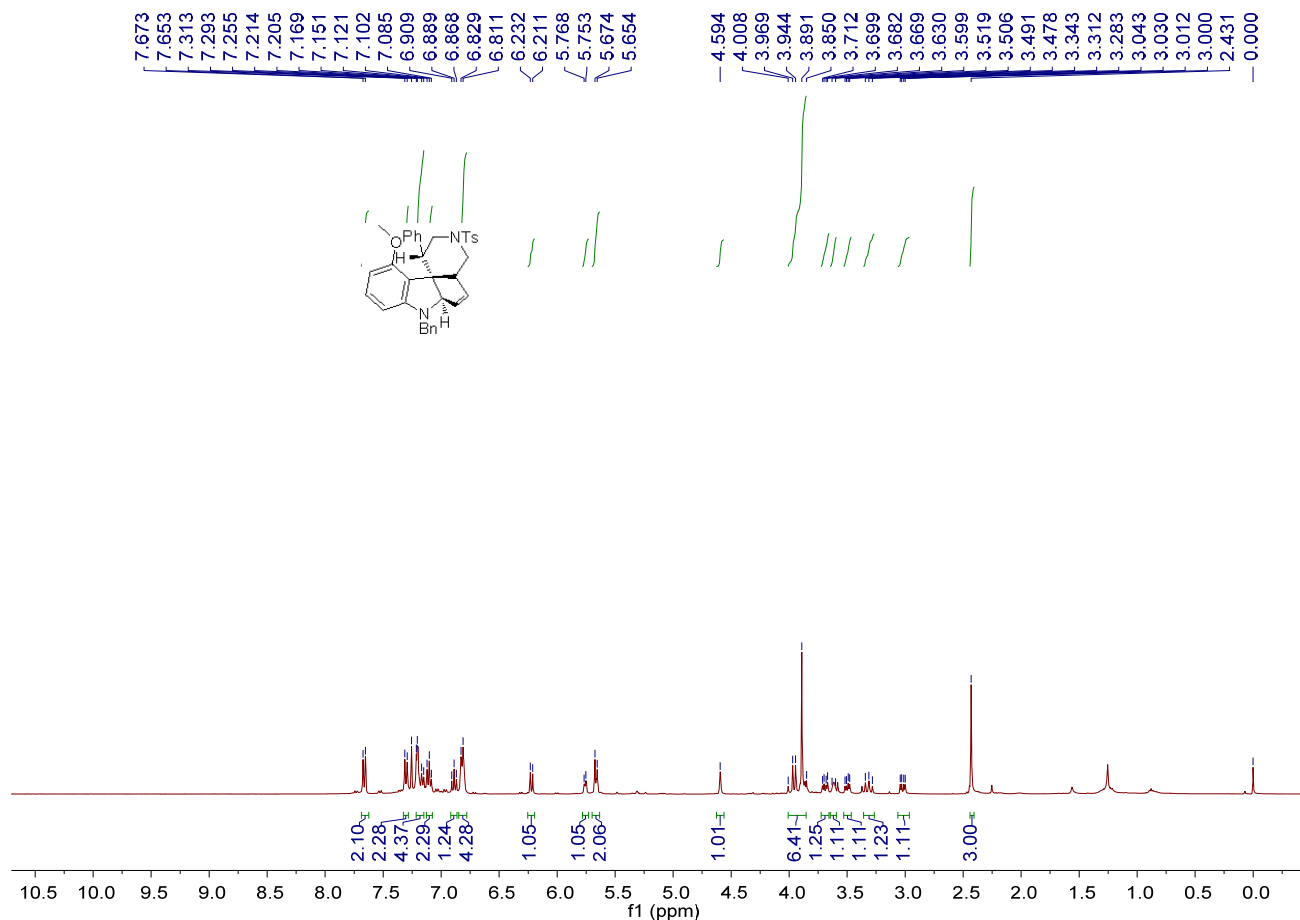

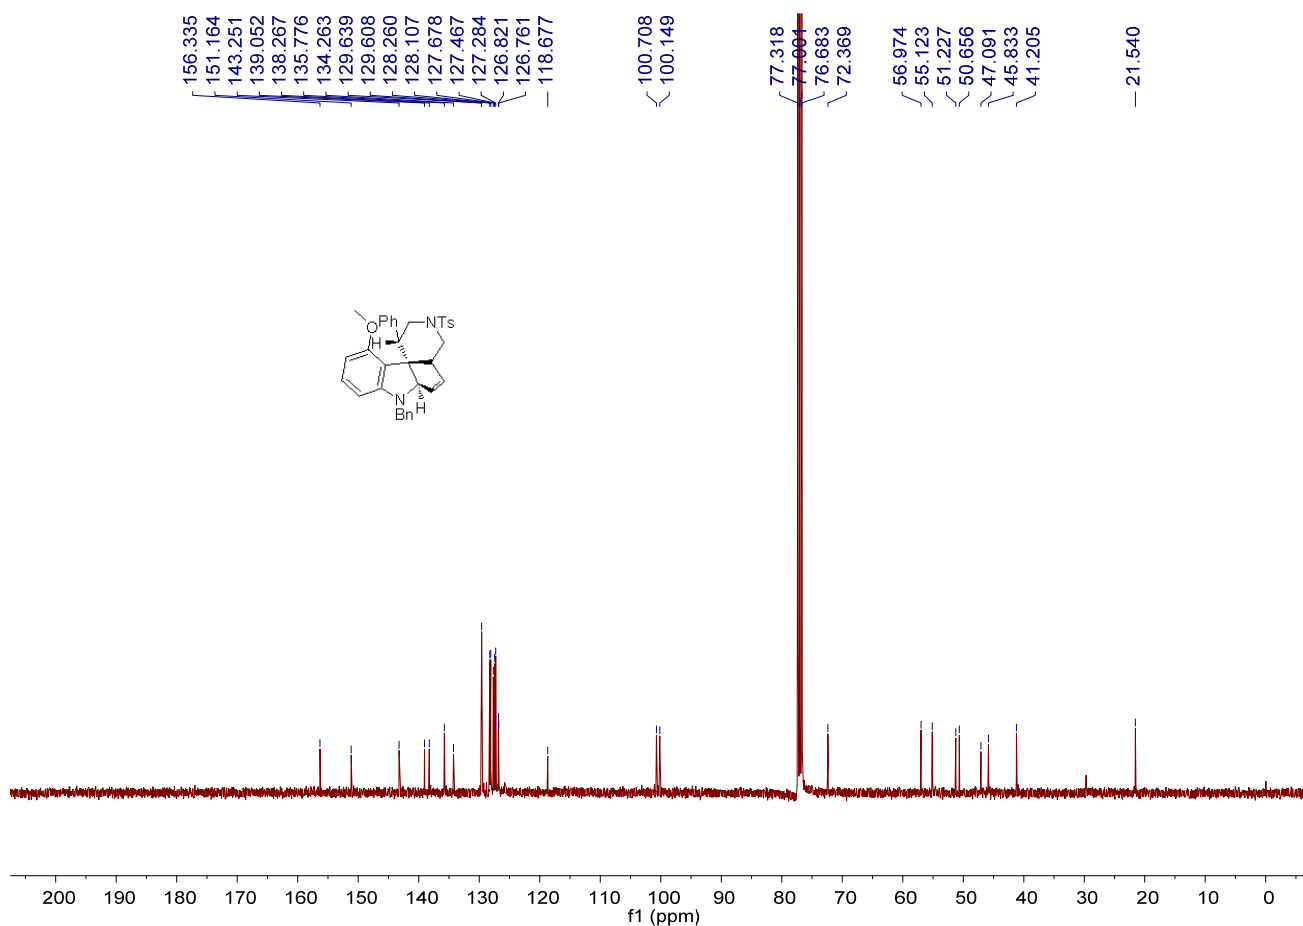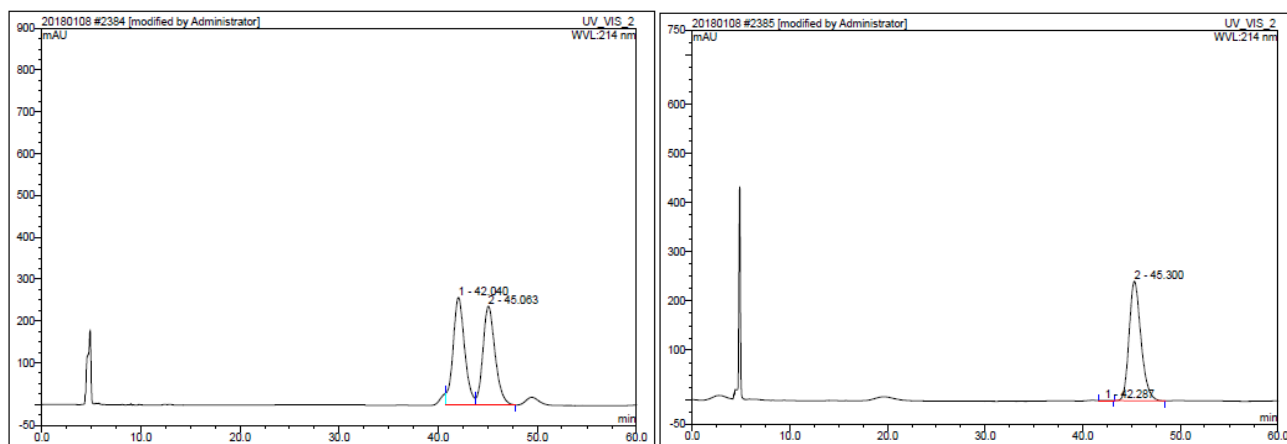

| No.    | Ret.Time min | Peak Name | Height mAU | Area mAU*min | Rel.Area % | Amount | Type |
|--------|--------------|-----------|------------|--------------|------------|--------|------|
| 1      | 42.04        | n.a.      | 256.915    | 347.820      | 50.75      | n.a.   | M*   |
| 2      | 45.06        | n.a.      | 236.220    | 337.479      | 49.25      | n.a.   | MB*  |
| Total: |              |           | 493.135    | 685.299      | 100.00     | 0.000  |      |

  

| No.    | Ret.Time min | Peak Name | Height mAU | Area mAU*min | Rel.Area % | Amount | Type |
|--------|--------------|-----------|------------|--------------|------------|--------|------|
| 1      | 42.29        | n.a.      | 0.382      | 0.258        | 0.08       | n.a.   | BMB* |
| 2      | 45.30        | n.a.      | 242.532    | 342.210      | 99.92      | n.a.   | BMB* |
| Total: |              |           | 242.915    | 342.468      | 100.00     | 0.000  |      |

Translation: Chiralcel IC column [ $\lambda = 214$  nm; eluent: Hexane/Isopropanol = 85/15; Flow rate: 0.70 mL/min;  $t_{\text{minor}} = 42.29$  min,  $t_{\text{major}} = 45.30$  min;  $ee\% = 99\%$ ]. (Note: In the 5 minute position, there is the peak of dichloromethane, due to that the sample was dissolved in dichloromethane for measuring).

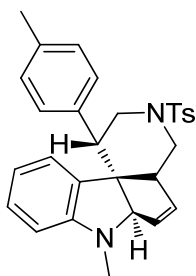

**(1S,4aR,6aR,11bS)-7-methyl-1-(*p*-tolyl)-3-tosyl-2,3,4,4a,6a,7-hexahydro-1H-pyrido[4',3':2,3]cyclopenta[1,2-*b*]indole 2l**

A white solid, 47% yield (22.1 mg). M.p.: 50-53 °C.  $^1\text{H}$  NMR ( $\text{CDCl}_3$ , TMS, 400 MHz)  $\delta$  2.17 (s, 3H), 2.40 (s, 3H), 2.43-2.50 (m, 4H), 3.01 (dd,  $J = 12.0, 12.0$  Hz, 1H), 3.18-3.26 (m, 2H), 3.62 (dd,  $J = 11.6, 4.8$  Hz, 1H), 3.89 (dd,  $J = 12.0, 6.0$  Hz, 1H), 4.46 (s, 1H), 5.70 (d,  $J = 5.6$  Hz, 1H), 5.81-5.84 (m, 1H), 5.97 (d,  $J = 8.0$  Hz, 1H), 6.59-6.61 (m, 3H), 6.80-6.83 (m, 2H), 6.94-6.98 (m, 1H), 7.05 (d,  $J = 7.2$  Hz, 1H), 7.32 (d,  $J = 8.0$  Hz, 2H), 7.66 (d,  $J = 8.0$  Hz, 2H).  $^{13}\text{C}$  NMR ( $\text{CDCl}_3$ , 100 MHz, TMS)  $\delta$  20.8, 21.4, 32.1, 47.2, 47.7, 50.0, 50.9, 57.3, 72.8, 106.0, 116.3, 122.7, 127.5, 128.0, 128.4, 129.0, 129.7, 133.7, 134.7, 134.8, 135.5, 136.1, 143.5, 149.9. IR ( $\text{CH}_2\text{Cl}_2$ )  $\nu$  2921, 2851, 1603, 1489, 1341, 1159, 1089, 933, 815, 719, 657  $\text{cm}^{-1}$ . MS (ESI)  $m/z$  (%): 471.20 (100)  $[\text{M}+\text{H}]^+$ ; HRMS (DART) Calcd. For  $\text{C}_{29}\text{H}_{31}\text{N}_2\text{O}_2\text{S}^+[\text{M}+\text{H}]^+$  requires 471.2101, found: 471.2098. Enantiomeric excess was determined by HPLC with a Chiralcel IC column [ $\lambda = 254$  nm; eluent: Hexane/Isopropanol = 90/10; Flow rate: 0.70 mL/min;  $t_{\text{minor}} = 54.57$  min,  $t_{\text{major}} = 49.77$  min; ee% = 90%;  $[\alpha]_{\text{D}}^{25} = -22.0$  (c 0.10,  $\text{CH}_2\text{Cl}_2$ )].



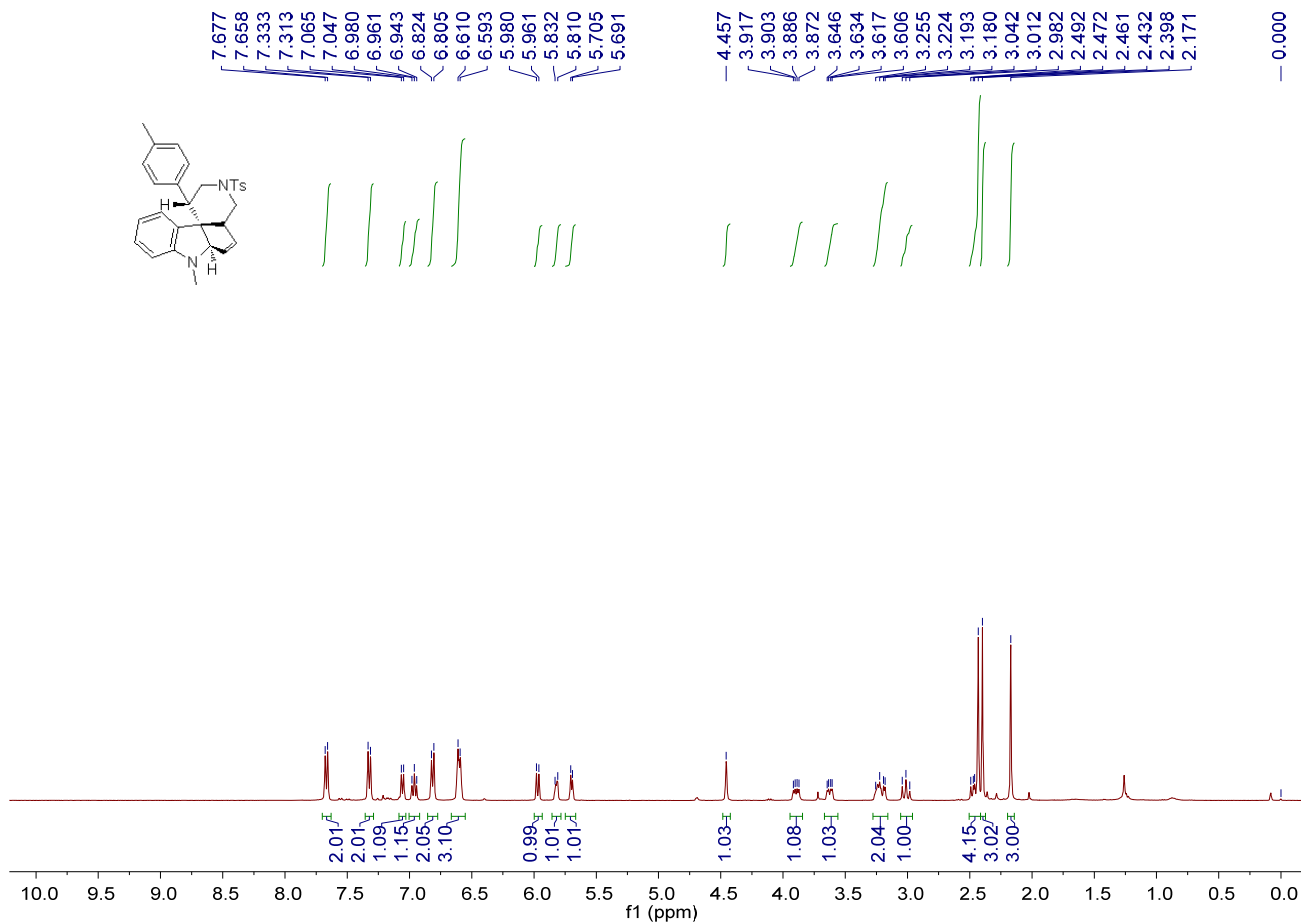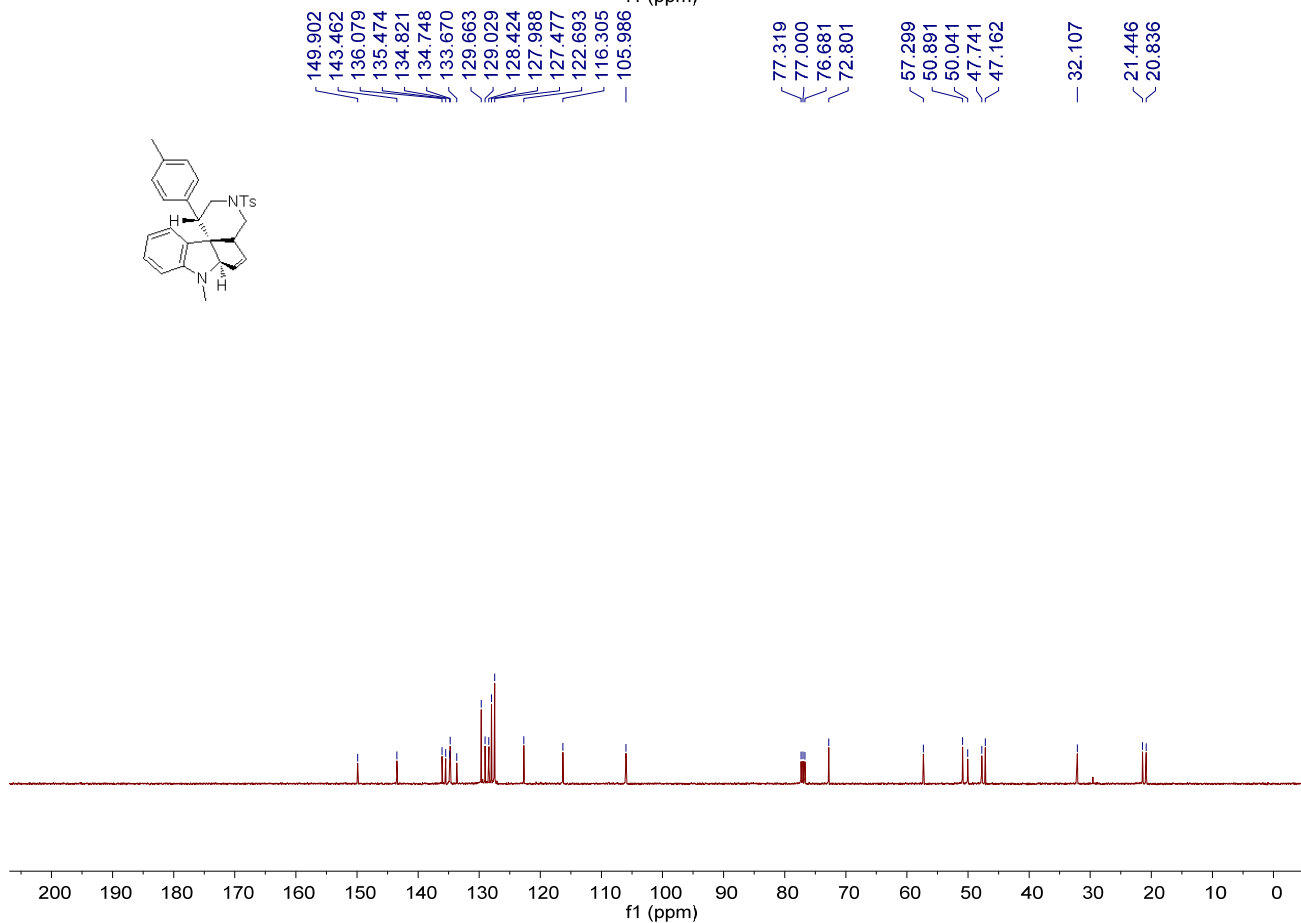

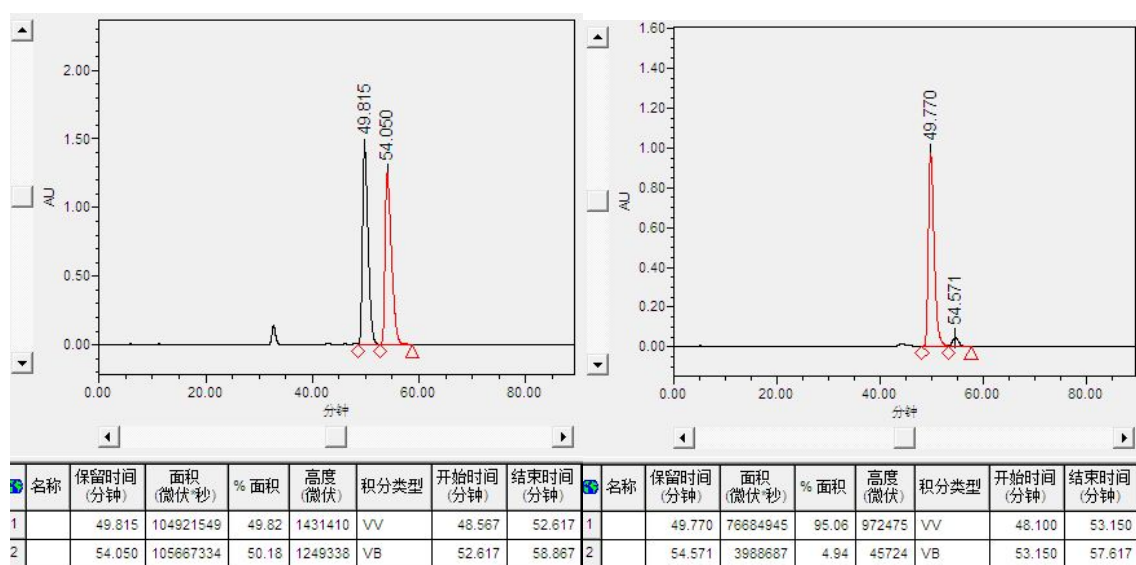

Translation: Chiralcel IC column [ $\lambda = 254$  nm; eluent: Hexane/Isopropanol = 90/10; Flow rate: 0.70 mL/min;  $t_{\text{minor}} = 54.57$  min,  $t_{\text{major}} = 49.77$  min; ee% = 90%].

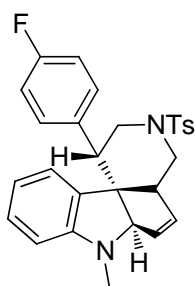

**(1S,4aR,6aR,11bS)-1-(4-fluorophenyl)-7-methyl-3-tosyl-2,3,4,4a,6a,7-hexahydro-1H-pyrido[4',3':2,3]cyclopenta[1,2-b]indole 2m**

A white solid, 46% yield (21.8 mg). M.p.: 91-94 °C.  $^1\text{H}$  NMR ( $\text{CDCl}_3$ , TMS, 400 MHz)  $\delta$  2.36 (dd,  $J = 12.4, 8.8$  Hz, 1H), 2.43 (s, 3H), 2.46 (s, 3H), 2.93 (dd,  $J = 12.0, 12.0$  Hz, 1H), 3.19-3.29 (m, 2H), 3.67 (dd,  $J = 12.0, 4.8$  Hz, 1H), 3.94 (dd,  $J = 12.0, 6.0$  Hz, 1H), 4.41 (s, 1H), 5.69 (d,  $J = 5.6$  Hz, 1H), 5.84-5.87 (m, 1H), 5.98 (d,  $J = 7.6$  Hz, 1H), 6.60-6.73 (m, 5H), 6.96-7.01 (m, 1H), 7.07-7.09 (m, 1H), 7.35 (d,  $J = 8.0$  Hz, 2H), 7.68 (d,  $J = 8.0$  Hz, 2H).  $^{13}\text{C}$  NMR ( $\text{CDCl}_3$ , 100 MHz, TMS)  $\delta$  21.5, 31.9, 47.1, 47.8, 50.5, 50.6, 57.3, 72.6, 106.0, 114.1 (d,  $J = 20.9$  Hz), 116.5, 122.7, 127.6, 128.6 (d,  $J = 15.7$  Hz), 129.0 (d,  $J = 7.8$  Hz), 129.8, 133.6, 134.4 (d,  $J = 3.3$  Hz), 134.5, 135.0, 143.7, 149.8, 161.6 (d,  $J = 243.5$  Hz).  $^{19}\text{F}$  NMR ( $\text{CDCl}_3$ , 376 MHz,  $\text{CFCl}_3$ )  $\delta$  -115.9. IR ( $\text{CH}_2\text{Cl}_2$ )  $\nu$  3049, 2919, 1602, 1509, 1341, 1158, 935, 833, 770, 657  $\text{cm}^{-1}$ . MS (ESI)  $m/z$  (%): 475.18 (100)  $[\text{M}+\text{H}]^+$ ; HRMS (ESI) Calcd. For  $\text{C}_{28}\text{H}_{28}\text{N}_2\text{O}_2\text{FS}^+$   $[\text{M}+\text{H}]^+$  requires 475.1850, found: 475.1839. Enantiomeric excess was determined by HPLC with a Chiralcel IC column [ $\lambda = 254$  nm; eluent: Hexane/Isopropanol = 94/6;

Flow rate: 0.70 mL/min;  $t_{\text{minor}} = 100.31$  min,  $t_{\text{major}} = 83.00$  min;  $ee\% = 87\%$ ;  $[\alpha]_D^{25} = -106.2$  (c 0.50,  $\text{CH}_2\text{Cl}_2$ ).

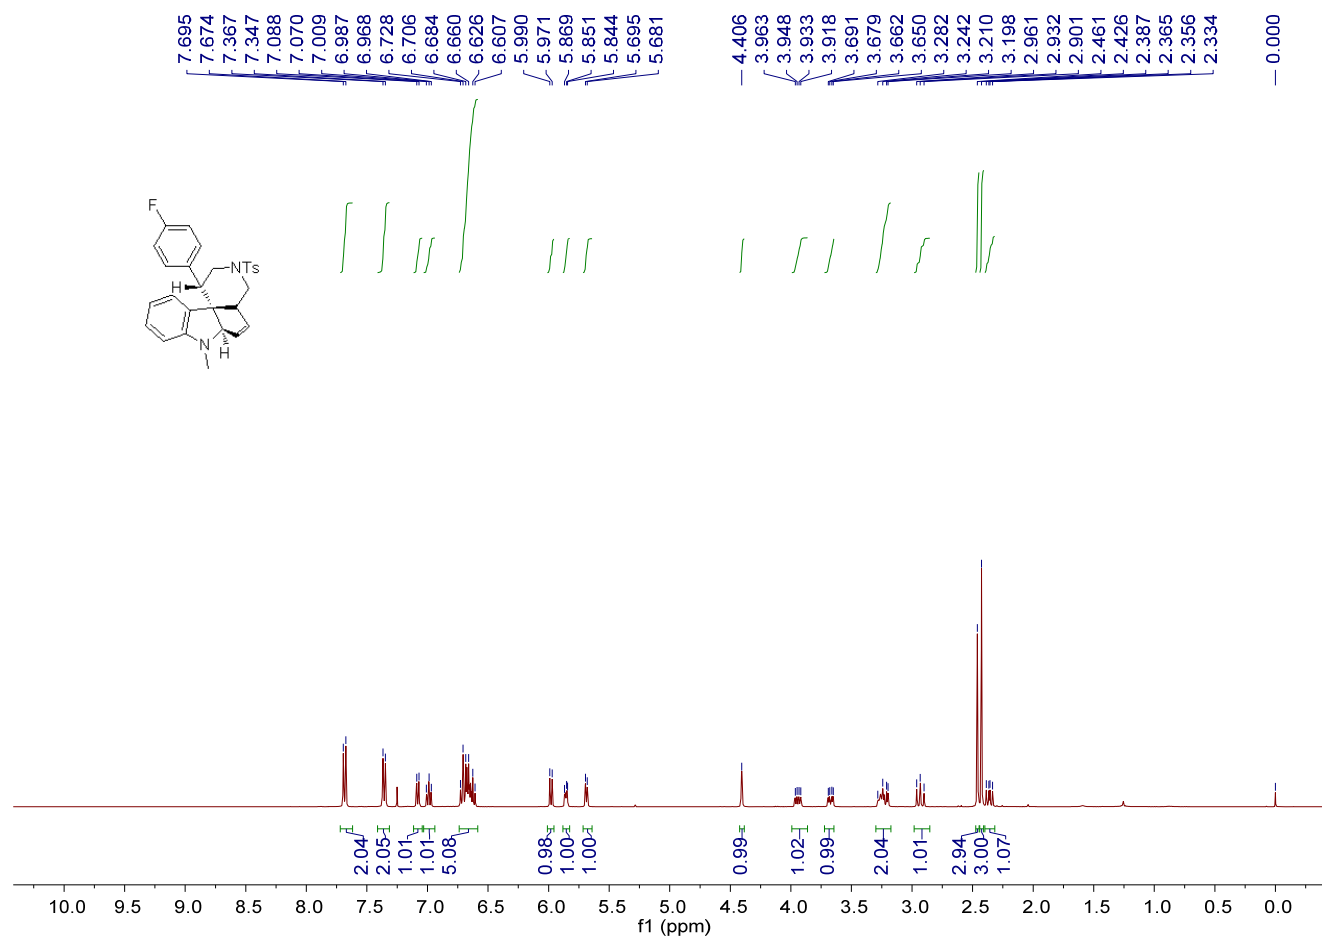

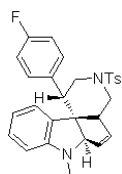

162.821  
160.386  
149.824  
143.659  
135.034  
134.495  
134.401  
134.368  
133.585  
129.791  
129.071  
128.993  
128.750  
128.593  
127.581  
122.698  
116.517  
114.226  
114.017  
106.042  
77.318  
77.000  
76.682  
72.593  
57.307  
50.574  
50.469  
47.826  
47.140  
31.933  
21.549

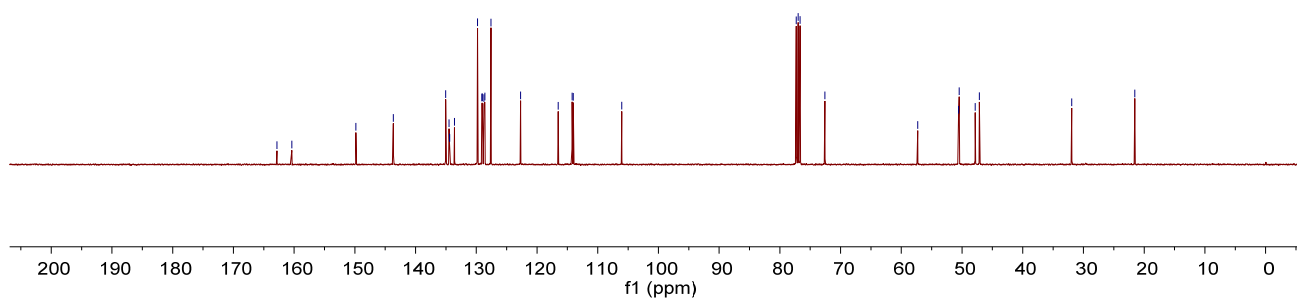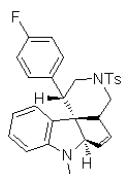

-115.916  
-115.935  
-115.954  
-115.975  
-115.993

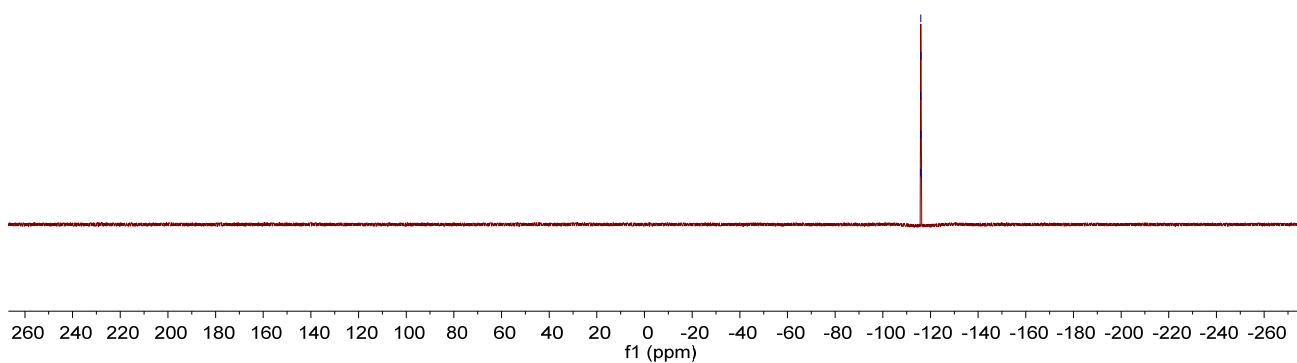

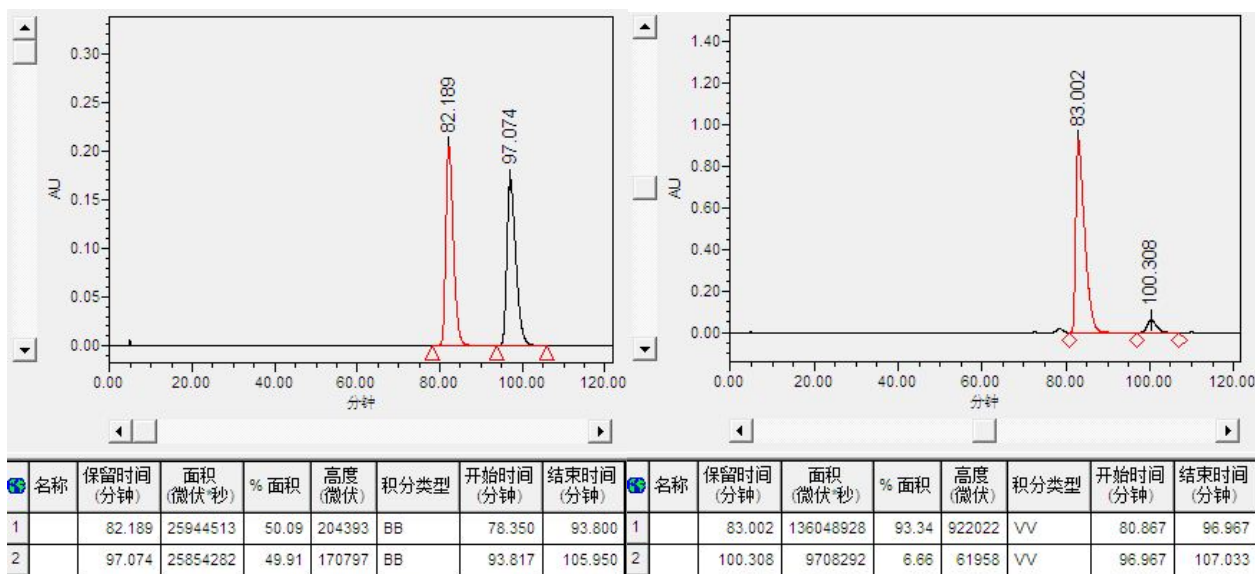

Translation: Chiralcel IC column [ $\lambda = 254$  nm; eluent: Hexane/Isopropanol = 94/6; Flow rate: 0.70 mL/min;  $t_{\text{minor}} = 100.31$  min,  $t_{\text{major}} = 83.00$  min; ee% = 87%].

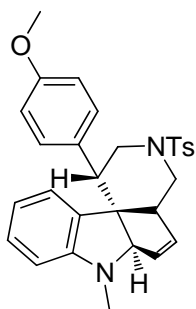

**(1*S*,4*aR*,6*aR*,11*bS*)-1-(4-methoxyphenyl)-7-methyl-3-tosyl-2,3,4,4*a*,6*a*,7-hexahydro-1*H*-pyrido[4',3':2,3]cyclopenta[1,2-*b*]indole 2n**

A white solid, 46% yield (22.5 mg). M.p.: 77-80 °C.  $^1\text{H}$  NMR ( $\text{CDCl}_3$ , TMS, 400 MHz)  $\delta$  2.43 (s, 3H), 2.45-2.48 (m, 4H), 2.99 (dd,  $J = 12.0, 12.0$  Hz, 1H), 3.17-3.27 (m, 2H), 3.63 (dd,  $J = 11.6, 4.8$  Hz, 1H), 3.68 (s, 3H), 3.89 (dd,  $J = 12.0, 6.0$  Hz, 1H), 4.45 (s, 1H), 5.71 (d,  $J = 6.0$  Hz, 1H), 5.82-5.85 (m, 1H), 5.98 (d,  $J = 8.0$  Hz, 1H), 6.54-6.65 (m, 5H), 6.95-7.00 (m, 1H), 7.05-7.08 (m, 1H), 7.34 (d,  $J = 8.0$  Hz, 2H), 7.67 (d,  $J = 8.0$  Hz, 2H).  $^{13}\text{C}$  NMR ( $\text{CDCl}_3$ , 100 MHz, TMS)  $\delta$  21.5, 32.2, 46.8, 47.8, 50.1, 50.9, 55.0, 57.4, 72.9, 106.1, 112.7, 116.4, 122.7, 127.6, 128.5, 128.6, 129.0, 129.7, 130.7, 133.7, 134.8, 134.9, 143.5, 150.0, 158.2. IR ( $\text{CH}_2\text{Cl}_2$ )  $\nu$  2920, 2852, 1602, 1514, 1340, 1161, 935, 833, 729, 658  $\text{cm}^{-1}$ . MS (ESI)  $m/z$  (%): 487.20 (100)  $[\text{M}+\text{H}]^+$ ; HRMS (ESI) Calcd. For  $\text{C}_{29}\text{H}_{31}\text{N}_2\text{O}_3\text{S}^+[\text{M}+\text{H}]^+$  requires 487.2050, found: 487.2042. Enantiomeric excess was determined by HPLC with a Chiralcel IA column [ $\lambda = 314$  nm; eluent: Hexane/Isopropanol = 90/10; Flow rate: 0.70 mL/min;  $t_{\text{minor}} = 35.52$

min,  $t_{\text{major}} = 26.75$  min; ee% = 91%;  $[\alpha]_{\text{D}}^{25} = -118.4$  (c 0.70,  $\text{CH}_2\text{Cl}_2$ ).

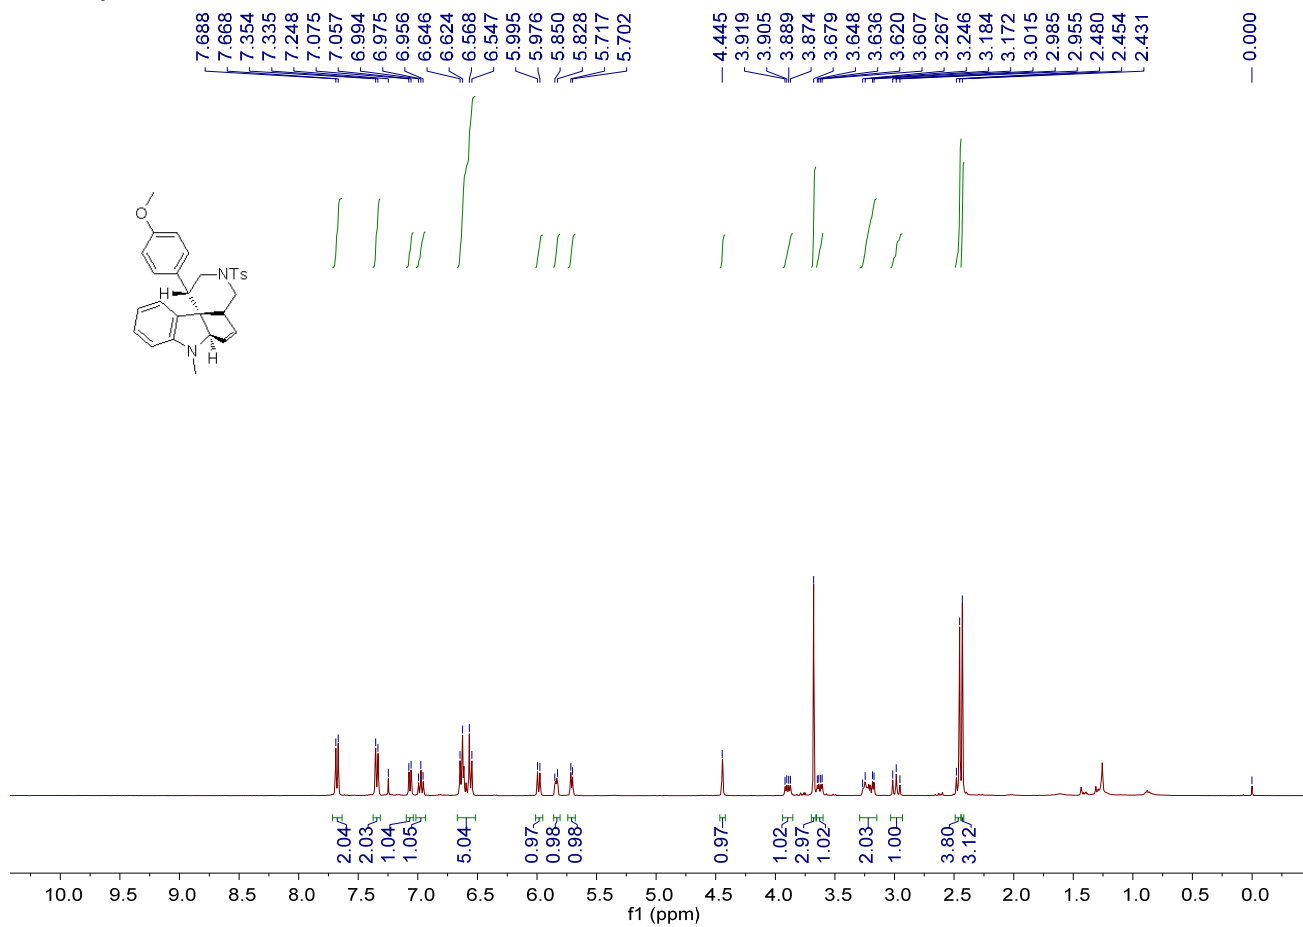

158.208  
 149.951  
 143.531  
 134.817  
 134.881  
 133.729  
 130.721  
 129.730  
 128.984  
 128.638  
 128.537  
 127.567  
 122.735  
 116.387  
 112.733  
 106.093  
 77.318  
 77.000  
 76.682  
 72.855  
 57.430  
 55.026  
 50.885  
 50.129  
 47.847  
 46.822  
 32.197  
 21.531

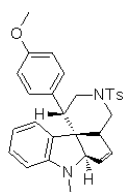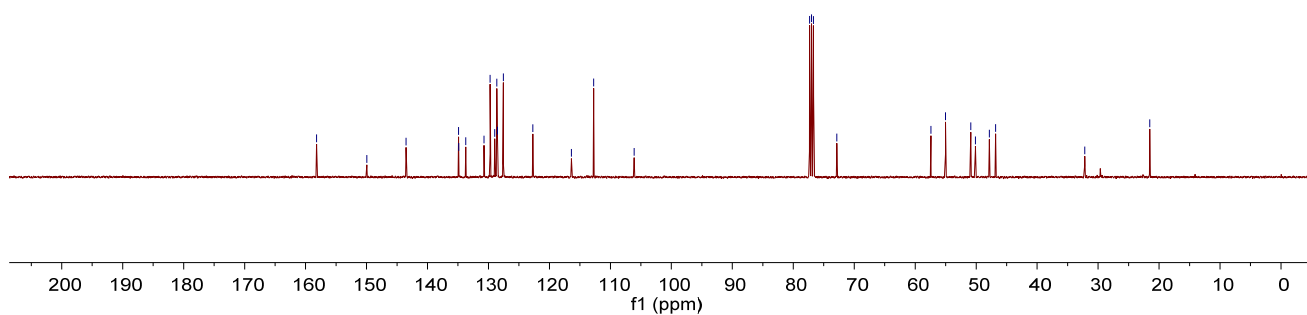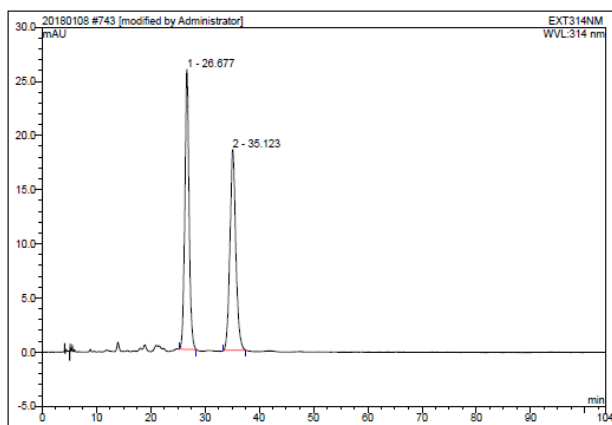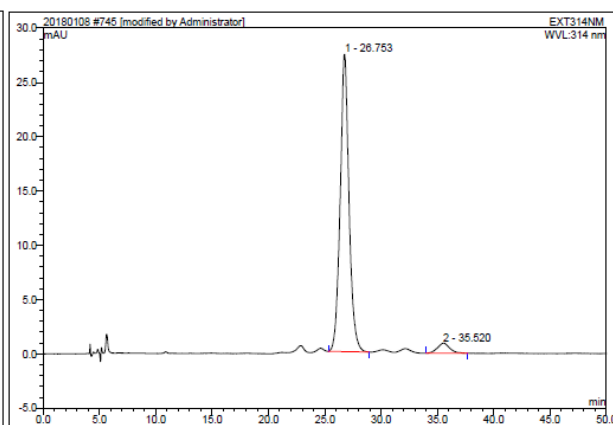

| No.    | Ret.Time min | Peak Name | Height mAU | Area mAU*min | Rel.Area % | Amount | Type |
|--------|--------------|-----------|------------|--------------|------------|--------|------|
| 1      | 26.68        | n.a.      | 25.848     | 23.382       | 50.13      | n.a.   | BMB  |
| 2      | 35.12        | n.a.      | 18.506     | 23.257       | 49.87      | n.a.   | BMB  |
| Total: |              |           | 44.354     | 46.639       | 100.00     | 0.000  |      |

| No.    | Ret.Time min | Peak Name | Height mAU | Area mAU*min | Rel.Area % | Amount | Type |
|--------|--------------|-----------|------------|--------------|------------|--------|------|
| 1      | 26.75        | n.a.      | 27.395     | 24.913       | 95.49      | n.a.   | BMB* |
| 2      | 35.52        | n.a.      | 0.937      | 1.176        | 4.51       | n.a.   | BMB* |
| Total: |              |           | 28.332     | 26.089       | 100.00     | 0.000  |      |

Translation: Chiralcel IA column [ $\lambda = 314$  nm; eluent: Hexane/Isopropanol = 90/10; Flow rate: 0.70 mL/min;  $t_{\text{minor}} = 35.52$  min,  $t_{\text{major}} = 26.75$  min; ee% = 91%].

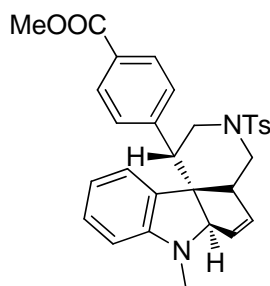

**Methyl 4-((1*S*,4*aR*,6*aR*,11*bS*)-7-methyl-3-tosyl-2,3,4,4*a*,6*a*,7-hexahydro-1*H*-pyrido[4',3':2,3]cyclopenta[1,2-*b*]indol-1-yl)benzoate 2o**

A white solid, 45% yield (23.3 mg). M.p.: 88-92 °C. <sup>1</sup>H NMR (CDCl<sub>3</sub>, TMS, 400 MHz) δ 2.33 (dd, *J* = 12.4, 8.8 Hz, 1H), 2.37 (s, 3H), 2.47 (s, 3H), 2.96 (dd, *J* = 12.0, 12.0 Hz, 1H), 3.27-3.32 (m, 2H), 3.71 (dd, *J* = 11.6, 4.8 Hz, 1H), 3.84 (s, 3H), 3.98 (dd, *J* = 12.0, 6.0 Hz, 1H), 4.42 (s, 1H), 5.67 (d, *J* = 6.0 Hz, 1H), 5.85-5.88 (m, 1H), 5.95 (d, *J* = 8.0 Hz, 1H), 6.62-6.66 (m, 1H), 6.76 (d, *J* = 8.0 Hz, 2H), 6.96-7.01 (m, 1H), 7.09-7.12 (m, 1H), 7.36 (d, *J* = 8.0 Hz, 2H), 7.67-7.70 (m, 4H). <sup>13</sup>C NMR (CDCl<sub>3</sub>, 100 MHz, TMS) δ 21.5, 31.9, 47.6, 48.0, 50.3, 50.8, 51.9, 57.3, 72.5, 106.2, 116.6, 122.7, 127.6, 127.7, 128.5, 128.6, 128.9, 129.8, 133.5, 134.2, 135.0, 143.7, 144.2, 149.7, 166.9. IR (CH<sub>2</sub>Cl<sub>2</sub>) ν 2923, 2852, 1717, 1603, 1488, 1208, 1164, 935, 779, 674 cm<sup>-1</sup>. MS (ESI) *m/z* (%): 515.19 (100) [M+H]<sup>+</sup>; HRMS (DART) Calcd. For C<sub>30</sub>H<sub>31</sub>N<sub>2</sub>O<sub>4</sub>S<sup>+</sup>[M+H]<sup>+</sup> requires 515.1999, found: 515.1994. Enantiomeric excess was determined by HPLC with a Chiralcel IF3 column [λ = 317 nm; eluent: Hexane/Isopropanol = 70/30; Flow rate: 0.70 mL/min; *t*<sub>minor</sub> = 37.91 min, *t*<sub>major</sub> = 33.82 min; ee% = 88%; [α]<sub>D</sub><sup>25</sup> = -108.1 (c 0.10, CH<sub>2</sub>Cl<sub>2</sub>)].



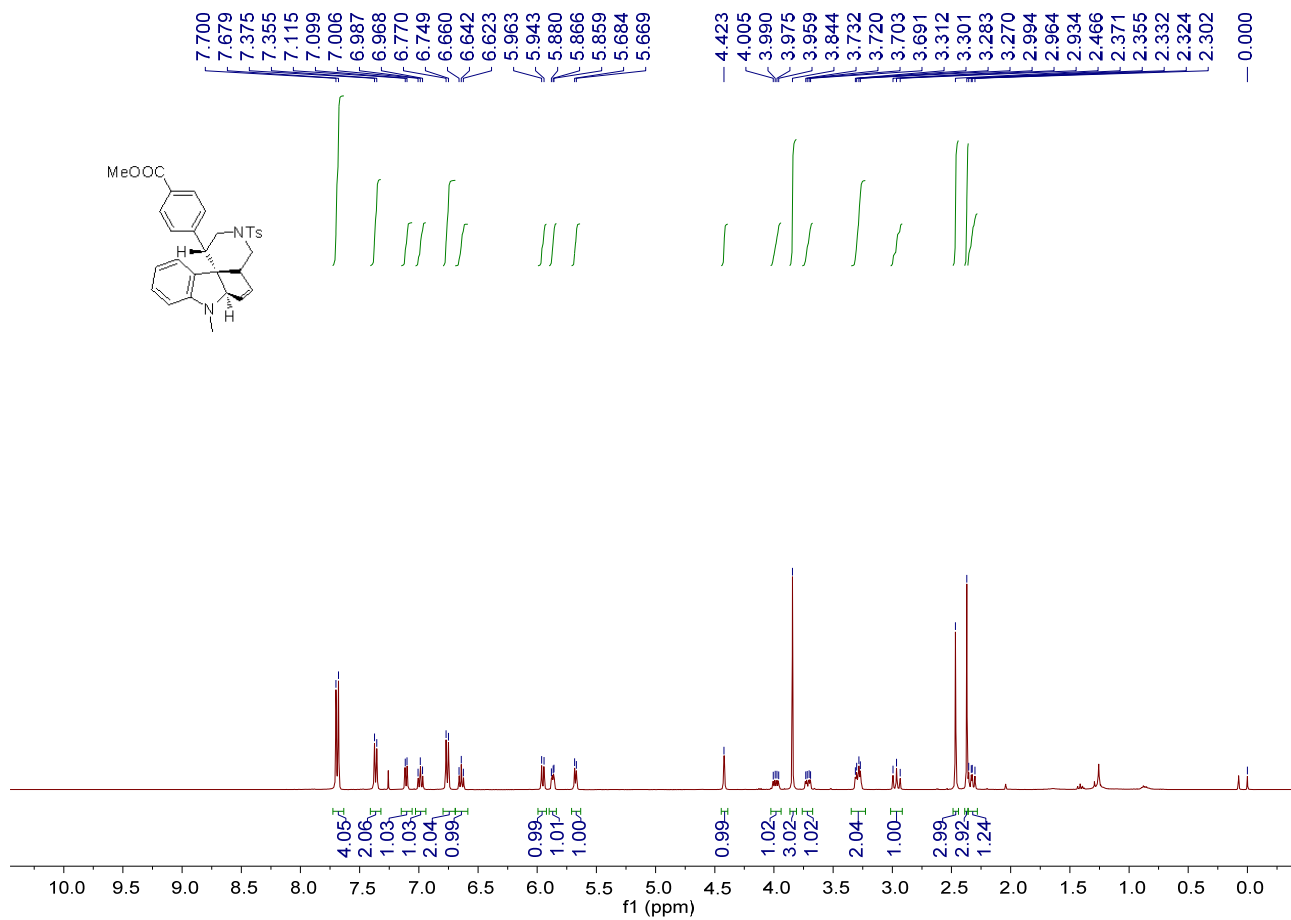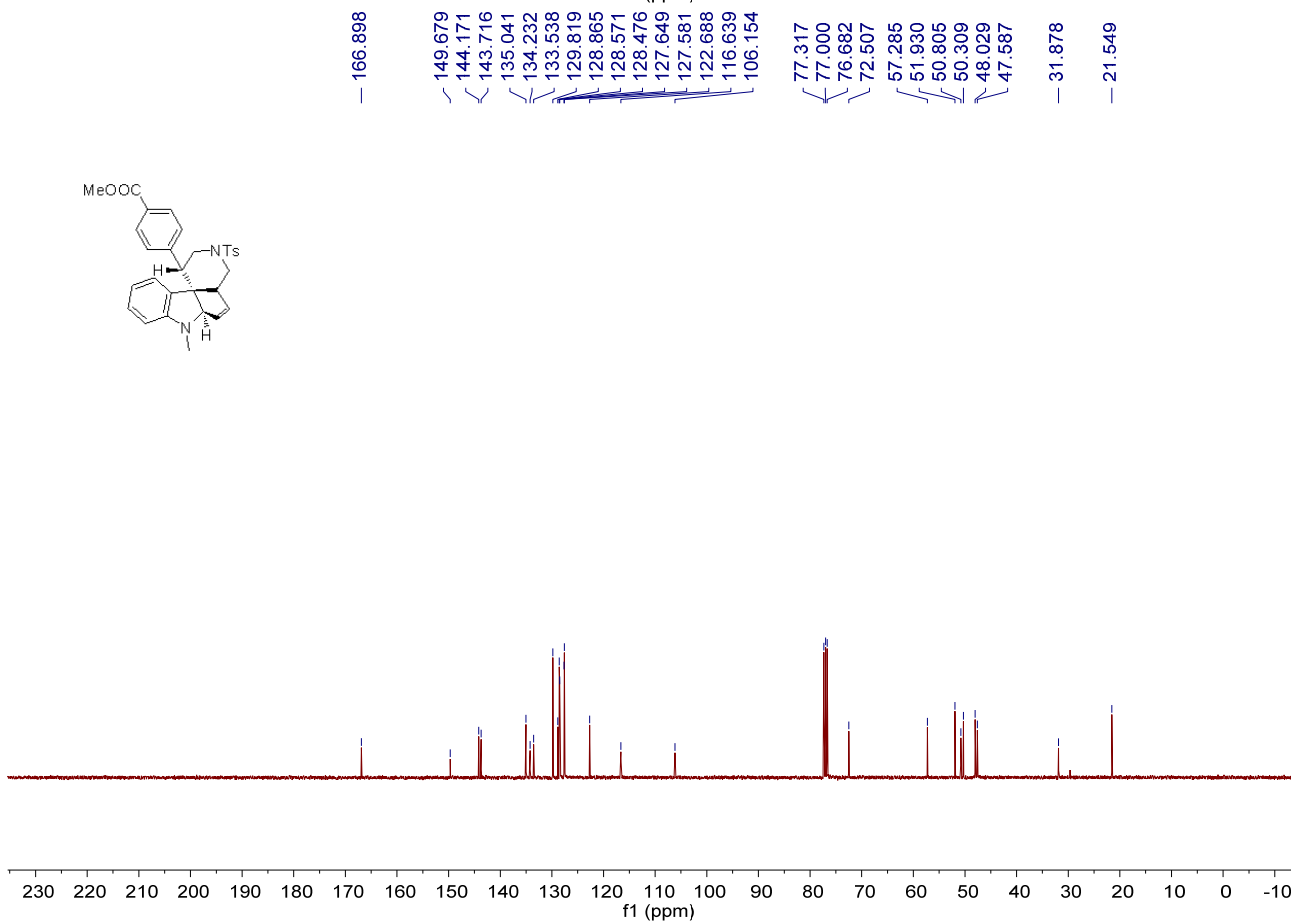

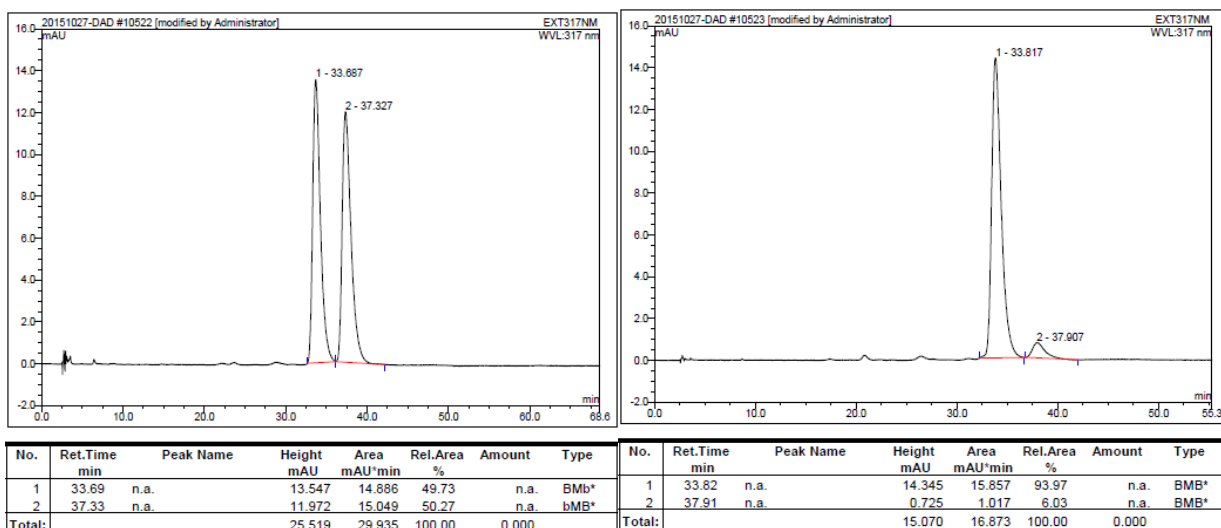

Translation: Chiralcel IF3 column [ $\lambda = 317$  nm; eluent: Hexane/Isopropanol = 70/30; Flow rate: 0.70 mL/min;  $t_{\text{minor}} = 37.91$  min,  $t_{\text{major}} = 33.82$  min; ee% = 88%].

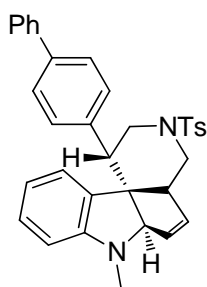

**(1*S*,4*aR*,6*aR*,11*bS*)-1-([1,1'-biphenyl]-4-yl)-7-methyl-3-tosyl-2,3,4,4*a*,6*a*,7-hexahydro-1*H*-pyrido[4',3':2,3]cyclopenta[1,2-*b*]indole 2p**

A white solid, 45% yield (23.9 mg). M.p.: 124-127 °C.  $^1\text{H}$  NMR ( $\text{CDCl}_3$ , TMS, 400 MHz)  $\delta$  2.38 (s, 3H), 2.41-2.46 (m, 4H), 3.03 (dd,  $J = 12.0, 12.0$  Hz, 1H), 3.26-3.31 (m, 2H), 3.71 (dd,  $J = 11.6, 4.8$  Hz, 1H), 3.95 (dd,  $J = 12.0, 6.0$  Hz, 1H), 4.47 (s, 1H), 5.70 (d,  $J = 6.0$  Hz, 1H), 5.84-5.87 (m, 1H), 5.96 (d,  $J = 8.0$  Hz, 1H), 6.62-6.66 (m, 1H), 6.76 (d,  $J = 8.0$  Hz, 2H), 6.96-7.01 (m, 1H), 7.09-7.12 (m, 1H), 7.23-7.50 (m, 7H), 7.48 (d,  $J = 8.0$  Hz, 2H), 7.69 (d,  $J = 8.0$  Hz, 2H).  $^{13}\text{C}$  NMR ( $\text{CDCl}_3$ , 100 MHz, TMS)  $\delta$  21.6, 32.1, 47.5, 47.7, 50.5, 50.6, 57.5, 72.8, 106.1, 116.5, 122.8, 125.9, 126.8, 127.1, 127.6, 128.1, 128.6, 128.7, 128.9, 129.8, 133.7, 134.7, 134.9, 137.8, 139.3, 140.6, 143.6, 149.9. IR ( $\text{CH}_2\text{Cl}_2$ )  $\nu$  3051, 2920, 2847, 1602, 1488, 1340, 1160, 929, 838, 722, 659  $\text{cm}^{-1}$ . MS (ESI)  $m/z$  (%): 533.22 (100)  $[\text{M}+\text{H}]^+$ ; HRMS (DART) Calcd. For  $\text{C}_{34}\text{H}_{33}\text{N}_2\text{O}_2\text{S}^+[\text{M}+\text{H}]^+$  requires 533.2257, found: 533.2256. Enantiomeric excess was determined by HPLC with a Chiralcel IE3 column [ $\lambda = 214$  nm; eluent: Hexane/Isopropanol = 60/40; Flow rate: 0.70 mL/min;  $t_{\text{minor}} = 32.91$  min,  $t_{\text{major}} = 22.85$  min; ee% =

91%;  $[\alpha]_D^{25} = -63.8$  (c 0.08,  $\text{CH}_2\text{Cl}_2$ ).

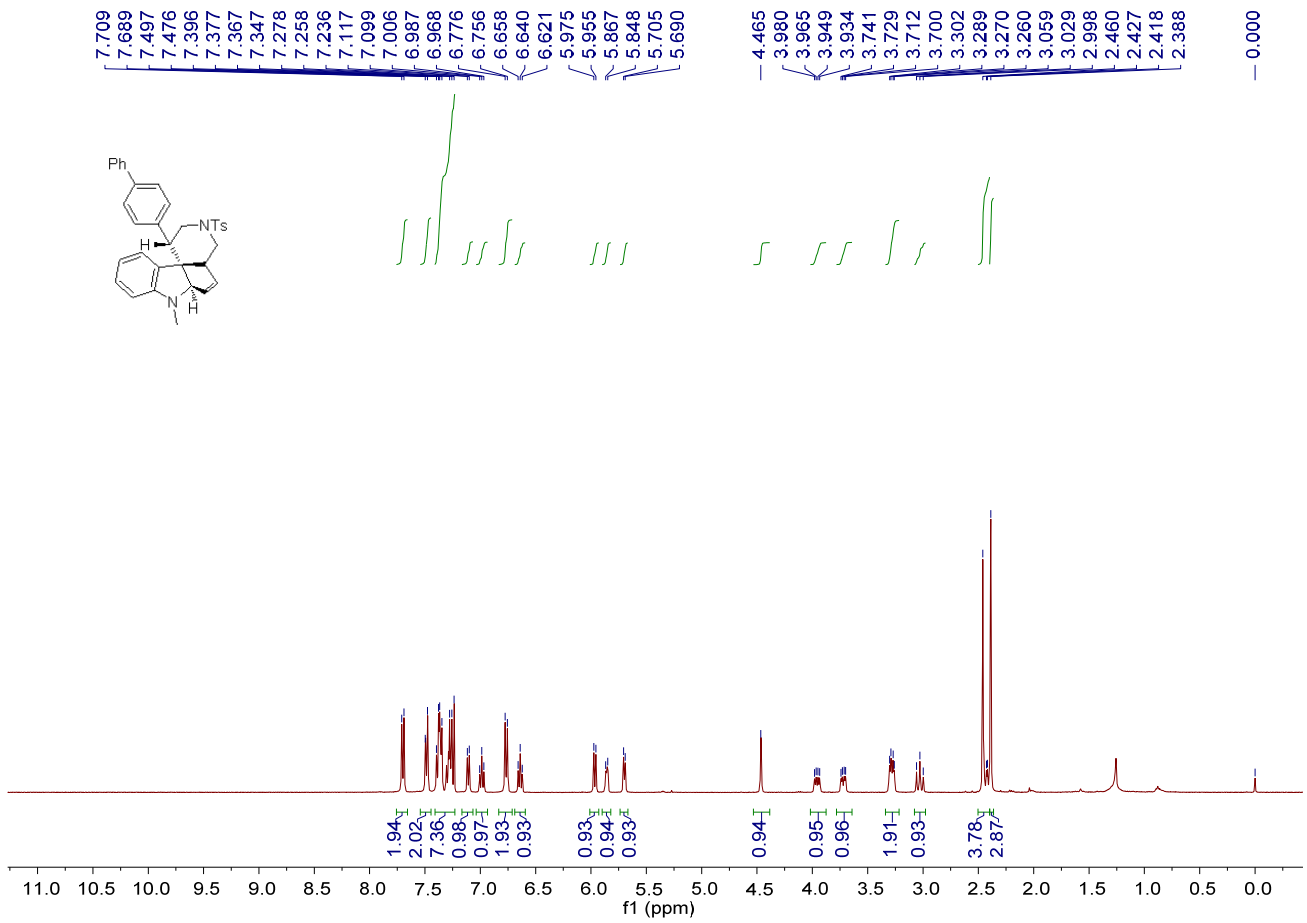

149.908  
143.602  
140.581  
139.321  
137.824  
134.922  
134.701  
133.676  
129.776  
128.933  
128.682  
128.625  
128.052  
127.602  
127.071  
126.768  
125.902  
122.787  
116.451  
106.116

77.319  
77.001  
76.683  
72.806

57.473  
50.617  
50.481  
47.746  
47.450

32.075

21.557

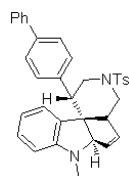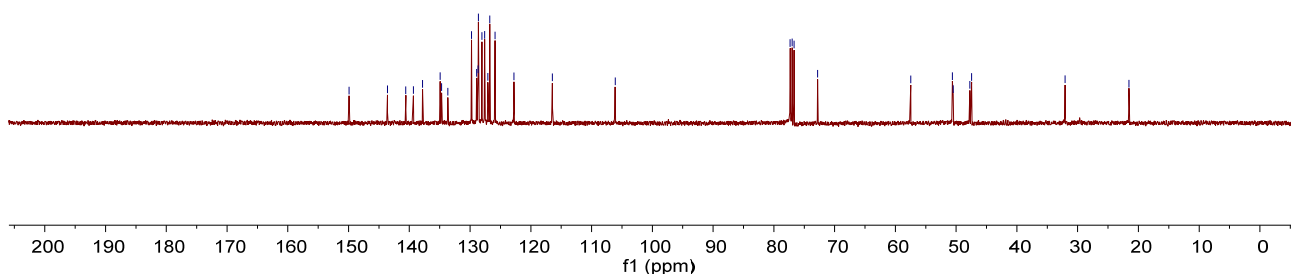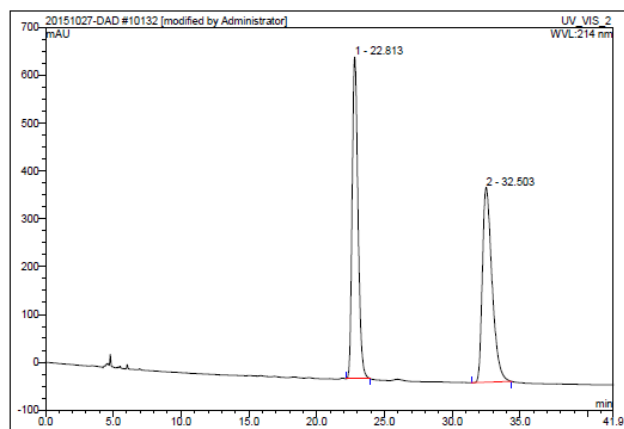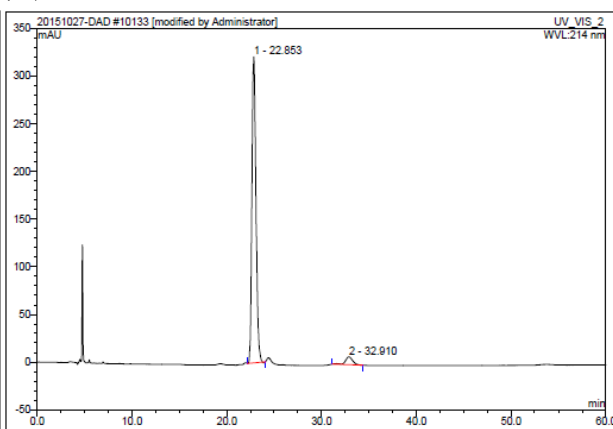

| No.    | Ret.Time min | Peak Name | Height mAU | Area mAU*min | Rel.Area % | Amount | Type |
|--------|--------------|-----------|------------|--------------|------------|--------|------|
| 1      | 22.81        | n.a.      | 671.875    | 336.707      | 50.02      | n.a.   | BMB* |
| 2      | 32.50        | n.a.      | 406.946    | 336.426      | 49.98      | n.a.   | BMB* |
| Total: |              |           | 1078.821   | 673.133      | 100.00     | 0.000  |      |

| No.    | Ret.Time min | Peak Name | Height mAU | Area mAU*min | Rel.Area % | Amount | Type |
|--------|--------------|-----------|------------|--------------|------------|--------|------|
| 1      | 22.85        | n.a.      | 320.726    | 158.499      | 95.51      | n.a.   | BMB* |
| 2      | 32.91        | n.a.      | 8.262      | 7.453        | 4.49       | n.a.   | BMB* |
| Total: |              |           | 328.987    | 165.952      | 100.00     | 0.000  |      |

Translation: Chiralcel IE3 column [ $\lambda = 214$  nm; eluent: Hexane/Isopropanol = 60/40; Flow rate: 0.70 mL/min;  $t_{\text{minor}} = 32.91$  min,  $t_{\text{major}} = 22.85$  min; ee% = 91%]. (Note: In the 5 minute position, there is the peak of dichloromethane, due to that the sample was dissolved in dichloromethane for measuring).

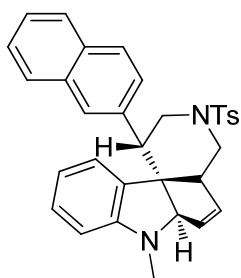

**(1S,4aR,6aR,11bS)-7-methyl-1-(naphthalen-2-yl)-3-tosyl-2,3,4,4a,6a,7-hexahydro-1H-pyrido[4',3':2,3]cyclopenta[1,2-b]indole 2q**

A white solid, 49% yield (24.7 mg). M.p.: 153-156 °C.  $^1\text{H}$  NMR ( $\text{CDCl}_3$ , TMS, 400 MHz)  $\delta$  2.27 (s, 3H), 2.46 (s, 3H), 2.51 (dd,  $J = 12.0, 8.8$  Hz, 1H), 3.17 (dd,  $J = 12.0, 12.0$  Hz, 1H), 3.30-3.34 (m, 1H), 3.40 (dd,  $J = 12.0, 4.8$  Hz, 1H), 3.74 (dd,  $J = 12.8, 5.2$  Hz, 1H), 3.96 (dd,  $J = 12.0, 6.0$  Hz, 1H), 4.56 (s, 1H), 5.71 (d,  $J = 6.0$  Hz, 1H), 5.85-5.88 (m, 2H), 6.63-6.67 (m, 1H), 6.75-6.78 (m, 1H), 6.92-6.97 (m, 1H), 7.14 (d,  $J = 8.0$  Hz, 1H), 7.23-7.24 (m, 1H), 7.34-7.37 (m, 4H), 7.46 (d,  $J = 8.0$  Hz, 1H), 7.57-7.72 (m, 4H).  $^{13}\text{C}$  NMR ( $\text{CDCl}_3$ , 100 MHz, TMS)  $\delta$  21.6, 32.1, 47.79, 47.81, 50.3, 50.9, 57.5, 72.9, 106.2, 116.5, 122.8, 125.4, 125.6, 126.1, 126.5, 126.6, 127.3, 127.55, 127.61, 128.7, 129.0, 129.8, 132.3, 132.8, 133.8, 134.7, 134.9, 136.4, 143.6, 149.9. IR ( $\text{CH}_2\text{Cl}_2$ )  $\nu$  3050, 2920, 1602, 1489, 1338, 1158, 934, 816, 723, 657  $\text{cm}^{-1}$ . MS (ESI)  $m/z$  (%): 507.20 (100)  $[\text{M}+\text{H}]^+$ ; HRMS (DART) Calcd. For  $\text{C}_{32}\text{H}_{31}\text{N}_2\text{O}_2\text{S}^+[\text{M}+\text{H}]^+$  requires 507.2101, found: 507.2094. Enantiomeric excess was determined by HPLC with a Chiralcel IC column [ $\lambda = 254$  nm; eluent: Hexane/Isopropanol = 90/10; Flow rate: 0.70 mL/min;  $t_{\text{minor}} = 68.13$  min,  $t_{\text{major}} = 62.80$  min; ee% = 90%;  $[\alpha]_{\text{D}}^{25} = -187.7$  (c 2.00,  $\text{CH}_2\text{Cl}_2$ )].

7.715  
7.695  
7.681  
7.657  
7.599  
7.576  
7.472  
7.451  
7.369  
7.347  
7.243  
7.234  
7.158  
7.139  
6.966  
6.947  
6.928  
6.775  
6.754  
6.667  
6.648  
6.630  
5.874  
5.864  
5.855  
5.719  
5.704

4.556  
3.982  
3.967  
3.952  
3.937  
3.764  
3.751  
3.732  
3.719  
3.430  
3.418  
3.399  
3.387  
3.337  
3.317  
3.301  
3.195  
3.165  
3.135  
2.532  
2.511  
2.502  
2.481  
2.463  
2.267  
0.000

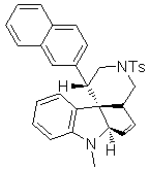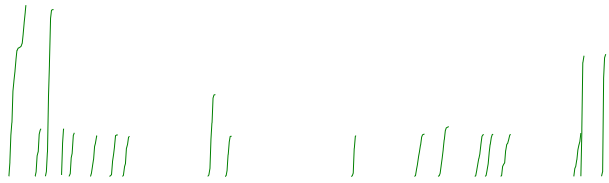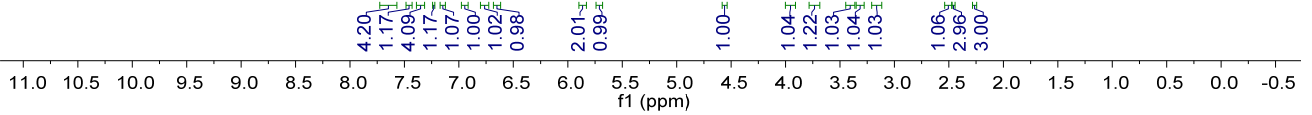

149.894  
143.607  
136.402  
134.940  
134.679  
133.794  
132.822  
132.289  
129.791  
128.990  
128.685  
127.613  
127.555  
127.306  
126.606  
126.491  
126.141  
125.570  
125.355  
122.822  
116.523  
106.153

77.318  
77.000  
76.682  
72.933

57.538  
50.910  
50.293  
47.812  
47.791

32.062  
21.557

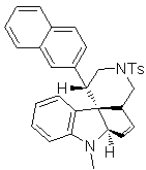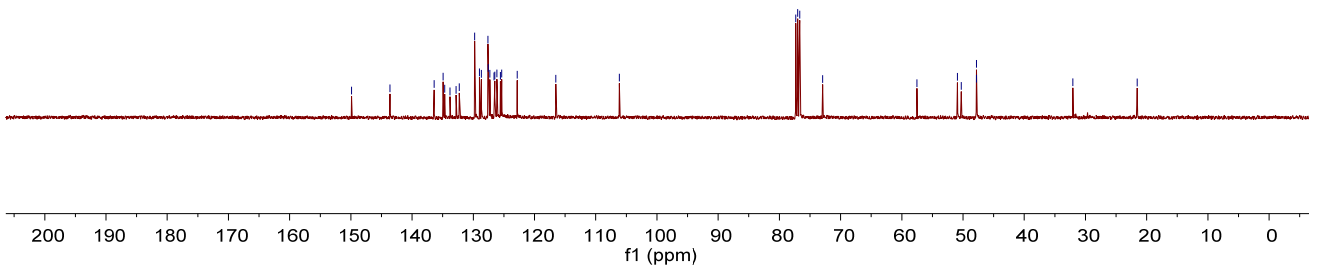

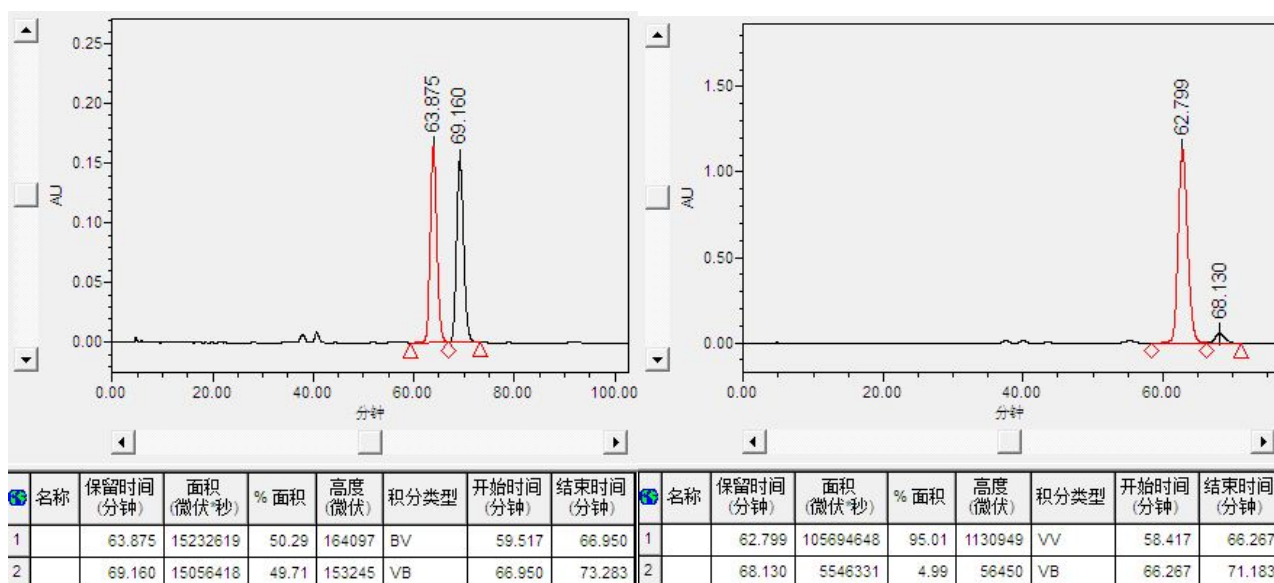

Translation: Chiralcel IC column [ $\lambda = 254$  nm; eluent: Hexane/Isopropanol = 90/10; Flow rate: 0.70 mL/min;  $t_{\text{minor}} = 68.13$  min,  $t_{\text{major}} = 62.80$  min; ee% = 90%].

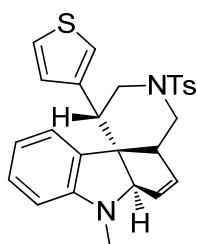

**(1*R*,4*aR*,6*aR*,11*bS*)-7-methyl-1-(thiophen-3-yl)-3-tosyl-2,3,4,4*a*,6*a*,7-hexahydro-1*H*-pyrido[4',3':2,3]cyclopenta[1,2-*b*]indole 2r**

A white solid, 48% yield (22.1 mg). M.p.: 145-148 °C.  $^1\text{H}$  NMR ( $\text{CDCl}_3$ , TMS, 400 MHz)  $\delta$  2.44 (s, 3H), 2.46 (s, 3H), 2.54 (dd,  $J = 12.0, 8.0$  Hz, 1H), 2.99 (dd,  $J = 12.0, 12.0$  Hz, 1H), 3.22-3.27 (m, 1H), 3.39 (dd,  $J = 12.4, 5.2$  Hz, 1H), 3.70 (dd,  $J = 11.6, 5.2$  Hz, 1H), 3.87 (dd,  $J = 12.4, 5.6$  Hz, 1H), 4.32 (s, 1H), 5.71 (d,  $J = 6.0$  Hz, 1H), 5.81-5.84 (m, 1H), 6.07 (d,  $J = 8.0$  Hz, 1H), 6.29 (dd,  $J = 4.8, 1.6$  Hz, 1H), 6.57-6.66 (m, 2H), 6.96-7.09 (m, 3H), 7.35 (d,  $J = 8.0$  Hz, 2H), 7.69 (d,  $J = 8.0$  Hz, 2H).  $^{13}\text{C}$  NMR ( $\text{CDCl}_3$ , 100 MHz, TMS)  $\delta$  21.5, 32.5, 43.3, 47.4, 49.7, 50.9, 57.2, 73.5, 116.6, 120.7, 122.7, 123.8, 127.2, 127.5, 128.8, 129.3, 129.8, 133.9, 134.98, 135.03, 139.2, 143.6, 150.2. IR ( $\text{CH}_2\text{Cl}_2$ )  $\nu$  3047, 2922, 1600, 1493, 1335, 1161, 935, 812, 732, 657  $\text{cm}^{-1}$ . MS (ESI)  $m/z$  (%): 463.15 (100)  $[\text{M}+\text{H}]^+$ ; HRMS (DART) Calcd. For  $\text{C}_{26}\text{H}_{27}\text{N}_2\text{O}_2\text{S}_2^+[\text{M}+\text{H}]^+$  requires 463.1508, found: 463.1505. Enantiomeric excess was determined by HPLC with a Chiralcel IC column [ $\lambda = 254$  nm; eluent: Hexane/Isopropanol = 94/6; Flow rate: 0.70 mL/min;  $t_{\text{minor}} = 133.59$  min,  $t_{\text{major}} = 121.45$  min; ee% = 95%;  $[\alpha]_{\text{D}}^{25} = -104.7$  (c 0.15,  $\text{CH}_2\text{Cl}_2$ )].

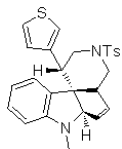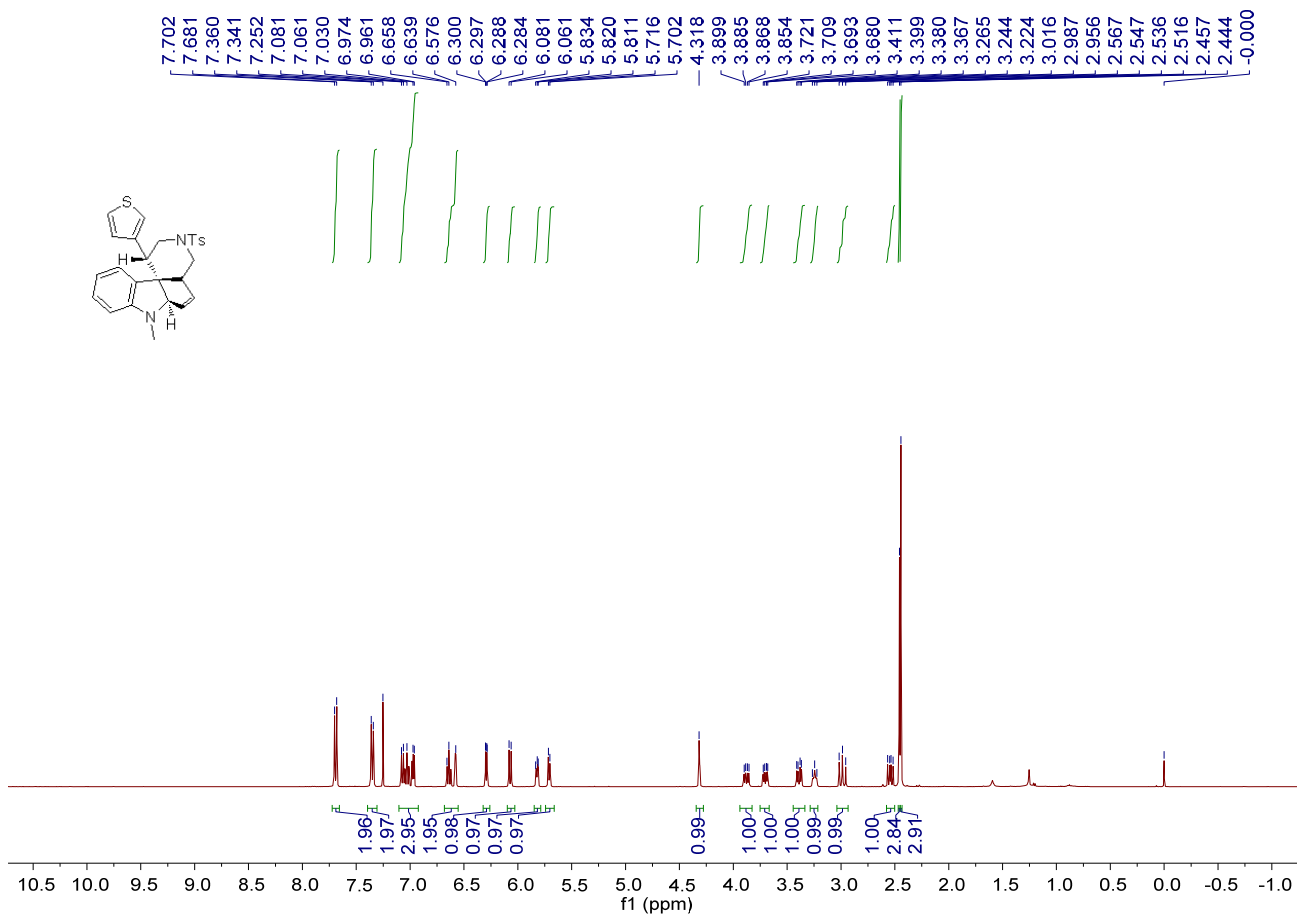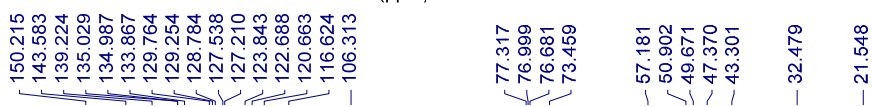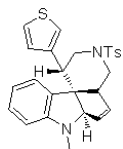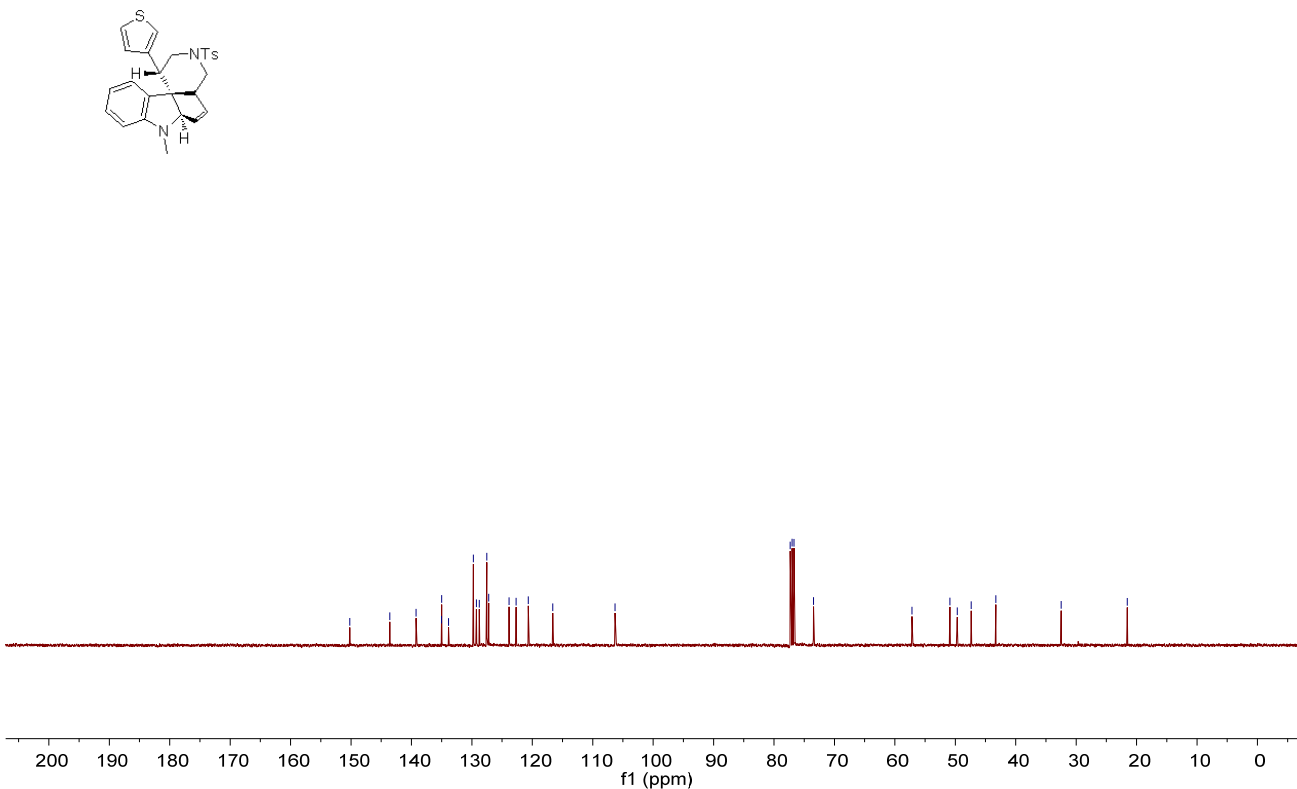



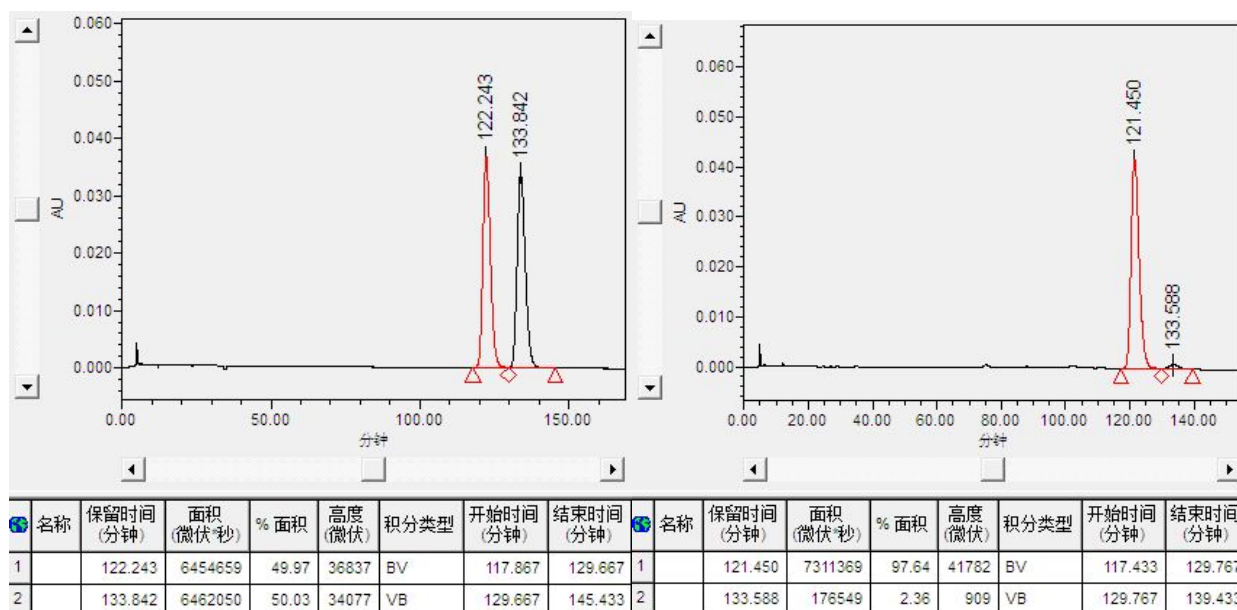

Translation: Chiralcel IC column [ $\lambda = 254$  nm; eluent: Hexane/Isopropanol = 94/6; Flow rate: 0.70 mL/min;  $t_{\text{minor}} = 133.59$  min,  $t_{\text{major}} = 121.45$  min; ee% = 95%].

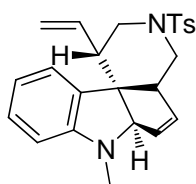

**(1*S*,4*aR*,6*aR*,11*bR*)-7-methyl-3-tosyl-1-vinyl-2,3,4,4*a*,6*a*,7-hexahydro-1*H*-pyrido[4',3':2,3]cyclopenta[1,2-*b*]indole 2s**

A white solid, 48% yield (19.4 mg). M.p.: 92-95 °C.  $^1\text{H}$  NMR ( $\text{CDCl}_3$ , TMS, 400 MHz)  $\delta$  2.45 (s, 3H), 2.55-2.61 (m, 1H), 2.68-2.76 (m, 2H), 2.82 (s, 3H), 3.11-3.15 (m, 1H), 3.46-3.54 (m, 1H), 3.66-3.71 (m, 1H), 4.42 (s, 1H), 4.75-4.87 (m, 2H), 5.42-5.52 (m, 1H), 5.81 (s, 2H), 6.31 (d,  $J = 7.6$  Hz, 1H), 6.61-6.65 (m, 1H), 6.94-7.10 (m, 2H), 7.34 (d,  $J = 8.0$  Hz, 2H), 7.67 (d,  $J = 8.0$  Hz, 2H).  $^{13}\text{C}$  NMR ( $\text{CDCl}_3$ , 100 MHz, TMS)  $\delta$  21.6, 32.6, 45.3, 46.9, 48.8, 51.5, 55.5, 73.2, 106.4, 116.6, 117.1, 122.6, 127.5, 128.6, 128.8, 129.7, 133.9, 135.1, 135.4, 135.5, 143.5, 150.4. IR ( $\text{CH}_2\text{Cl}_2$ )  $\nu$  2922, 2852, 2360, 1747, 1463, 1162, 1089, 937, 815, 747, 658  $\text{cm}^{-1}$ . MS (ESI)  $m/z$  (%): 407.17 (100)  $[\text{M}+\text{H}]^+$ ; HRMS (ESI) Calcd. For  $\text{C}_{24}\text{H}_{27}\text{N}_2\text{O}_2\text{S}^+ [\text{M}+\text{H}]^+$  requires 407.1788, found: 407.1775. Enantiomeric excess was determined by HPLC with a Chiralcel IE3 column [ $\lambda = 214$  nm; eluent: Hexane/Isopropanol = 80/20; Flow rate: 0.70 mL/min;  $t_{\text{minor}} = 29.53$  min,  $t_{\text{major}} = 27.93$  min; ee% = 95%;  $[\alpha]_{\text{D}}^{25} = 17.3$  (c 0.10,  $\text{CH}_2\text{Cl}_2$ )].

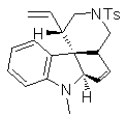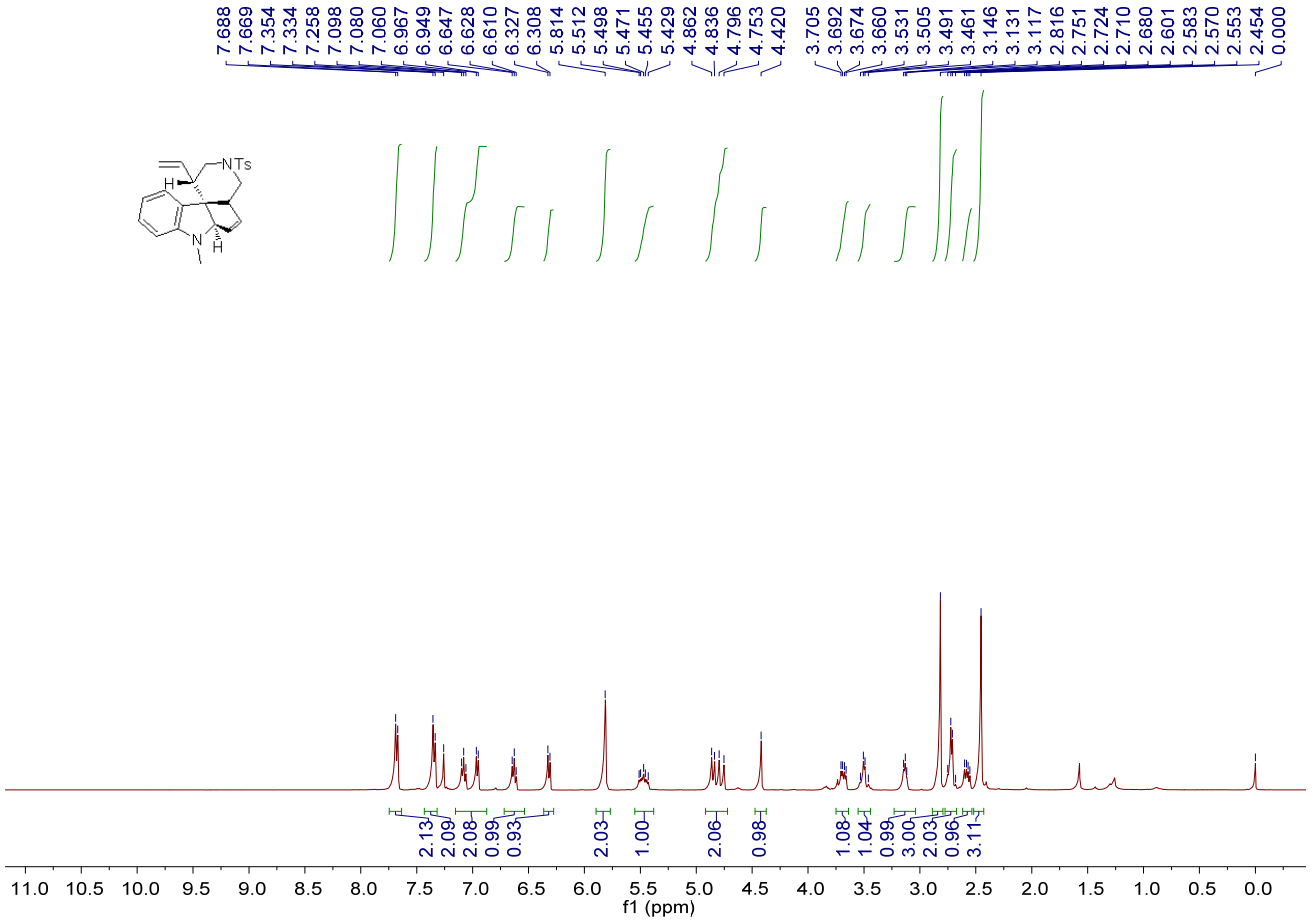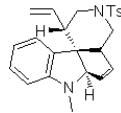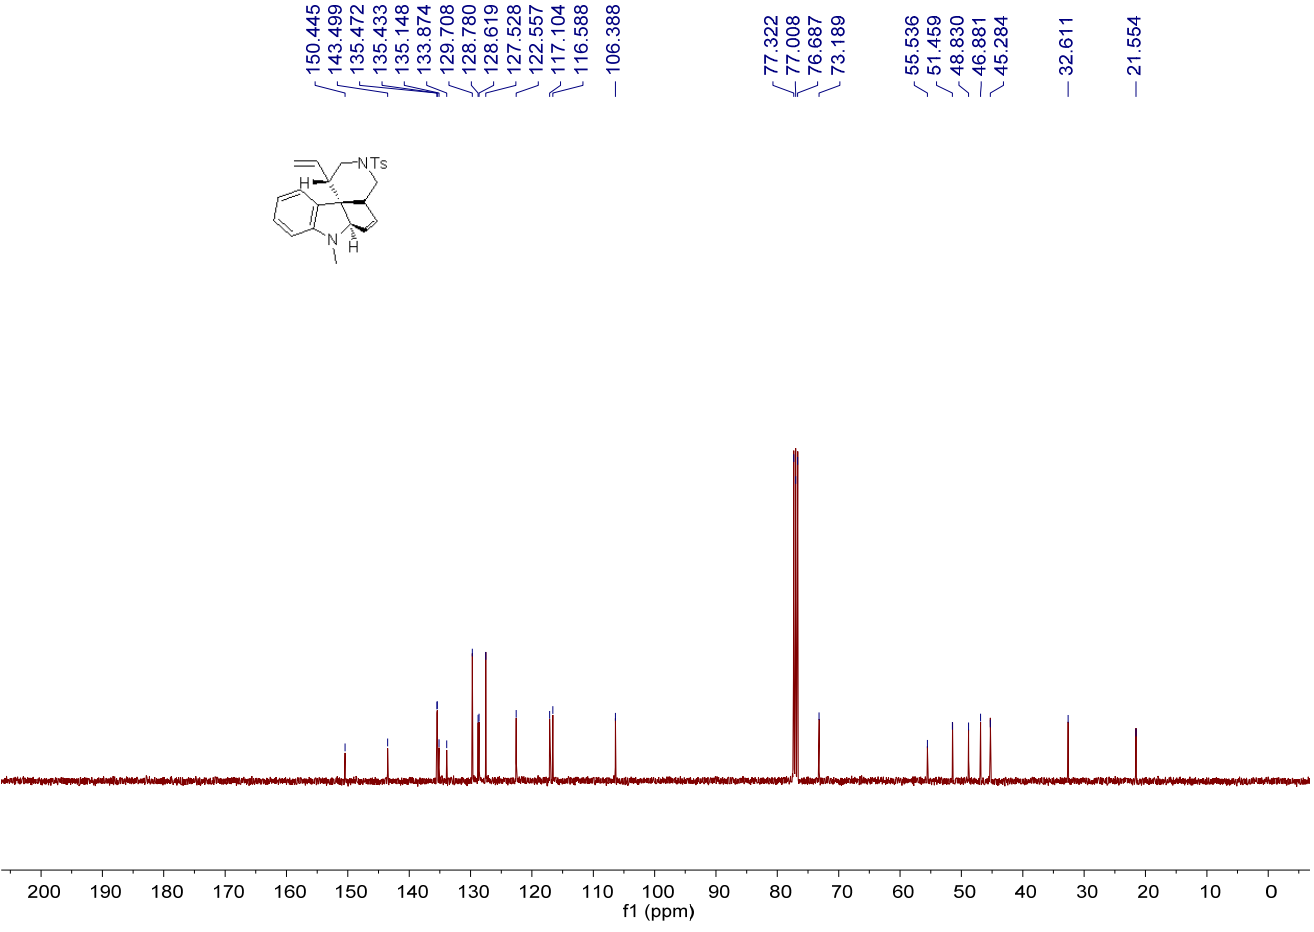

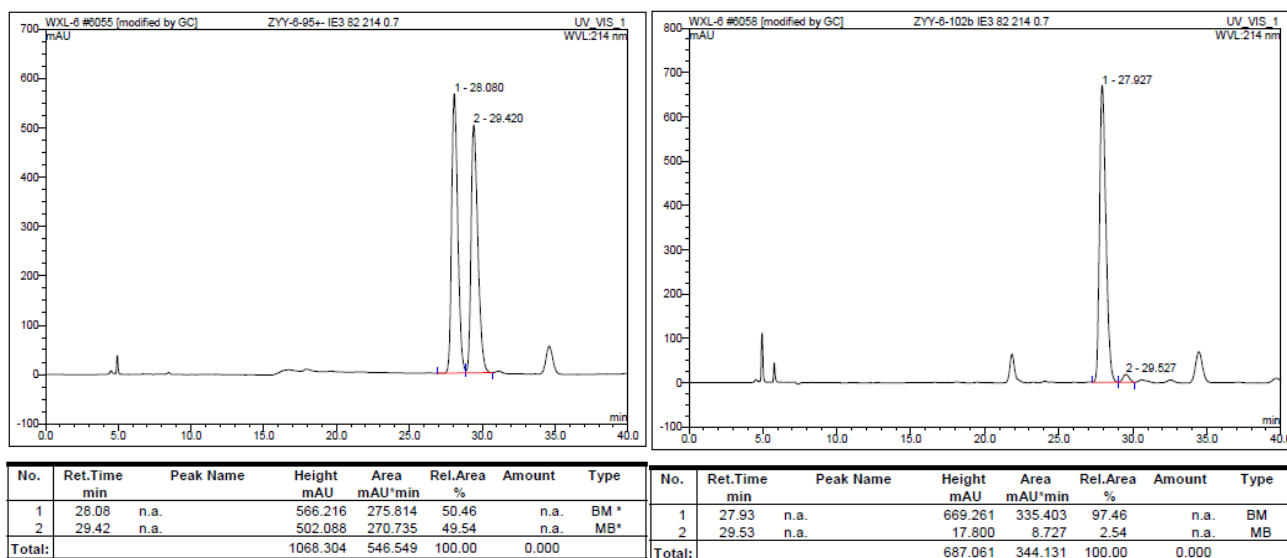

Translation: Chiralcel IE3 column [ $\lambda = 214$  nm; eluent: Hexane/Isopropanol = 80/20; Flow rate: 0.70 mL/min;  $t_{\text{minor}} = 29.53$  min,  $t_{\text{major}} = 27.93$  min; ee% = 95%]. (Note: In the 5 minute position, there is the peak of dichloromethane, due to that the sample was dissolved in dichloromethane for measuring).

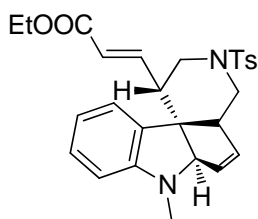

**(E)-ethyl 3-((1S,4aR,6aR,11bS)-7-methyl-3-tosyl-2,3,4,4a,6a,7-hexahydro-1H-pyrido[4',3':2,3]cyclopenta[1,2-b]indol-1-yl)acrylate 2t**

A white solid, 43% yield (20.8 mg). M.p.: 66-69 °C.  $^1\text{H}$  NMR ( $\text{CDCl}_3$ , TMS, 400 MHz)  $\delta$  1.21 (t,  $J = 7.2$  Hz, 3H), 2.27 (dd,  $J = 12.0, 8.8$  Hz, 1H), 2.46 (s, 3H), 2.55 (dd,  $J = 12.0, 12.0$  Hz, 1H), 2.80 (s, 3H), 2.81-2.87 (m, 1H), 3.15-3.20 (m, 1H), 3.61 (dd,  $J = 12.0, 5.2$  Hz, 1H), 3.85 (dd,  $J = 12.0, 5.6$  Hz, 1H), 4.08 (q,  $J = 7.2$  Hz, 2H), 4.33 (s, 1H), 5.45-5.50 (m, 1H), 5.72-5.74 (m, 1H), 5.83-5.86 (m, 1H), 6.30 (d,  $J = 8.0$  Hz, 1H), 6.54-6.66 (m, 2H), 6.96-6.99 (m, 1H), 7.06-7.11 (m, 1H), 7.35 (d,  $J = 8.0$  Hz, 2H), 7.66 (d,  $J = 8.0$  Hz, 2H).  $^{13}\text{C}$  NMR ( $\text{CDCl}_3$ , 100 MHz, TMS)  $\delta$  14.1, 21.5, 32.5, 44.8, 46.8, 50.2, 55.7, 60.2, 72.8, 106.7, 117.3, 122.2, 122.4, 127.6, 128.3, 129.0, 129.8, 133.5, 134.2, 135.5, 143.8, 145.5, 150.1, 165.9. IR ( $\text{CH}_2\text{Cl}_2$ )  $\nu$  3052, 2933, 1721, 1601, 1342, 1168, 1011, 932, 822, 750, 662  $\text{cm}^{-1}$ . MS (ESI)  $m/z$  (%): 479.19 (100)  $[\text{M}+\text{H}]^+$ ; HRMS (ESI) Calcd. For  $\text{C}_{27}\text{H}_{31}\text{N}_2\text{O}_4\text{S}^+$   $[\text{M}+\text{H}]^+$  requires 479.1999, found: 479.1985. Enantiomeric excess was determined by HPLC with a Chiralcel

IE3 column [ $\lambda = 325$  nm; eluent: Hexane/Isopropanol = 80/20; Flow rate: 0.70 mL/min;  $t_{\text{minor}} = 82.44$  min,  $t_{\text{major}} = 62.63$  min; ee% = 99%;  $[\alpha]_{\text{D}}^{25} = -31.2$  (c 0.08,  $\text{CH}_2\text{Cl}_2$ )].

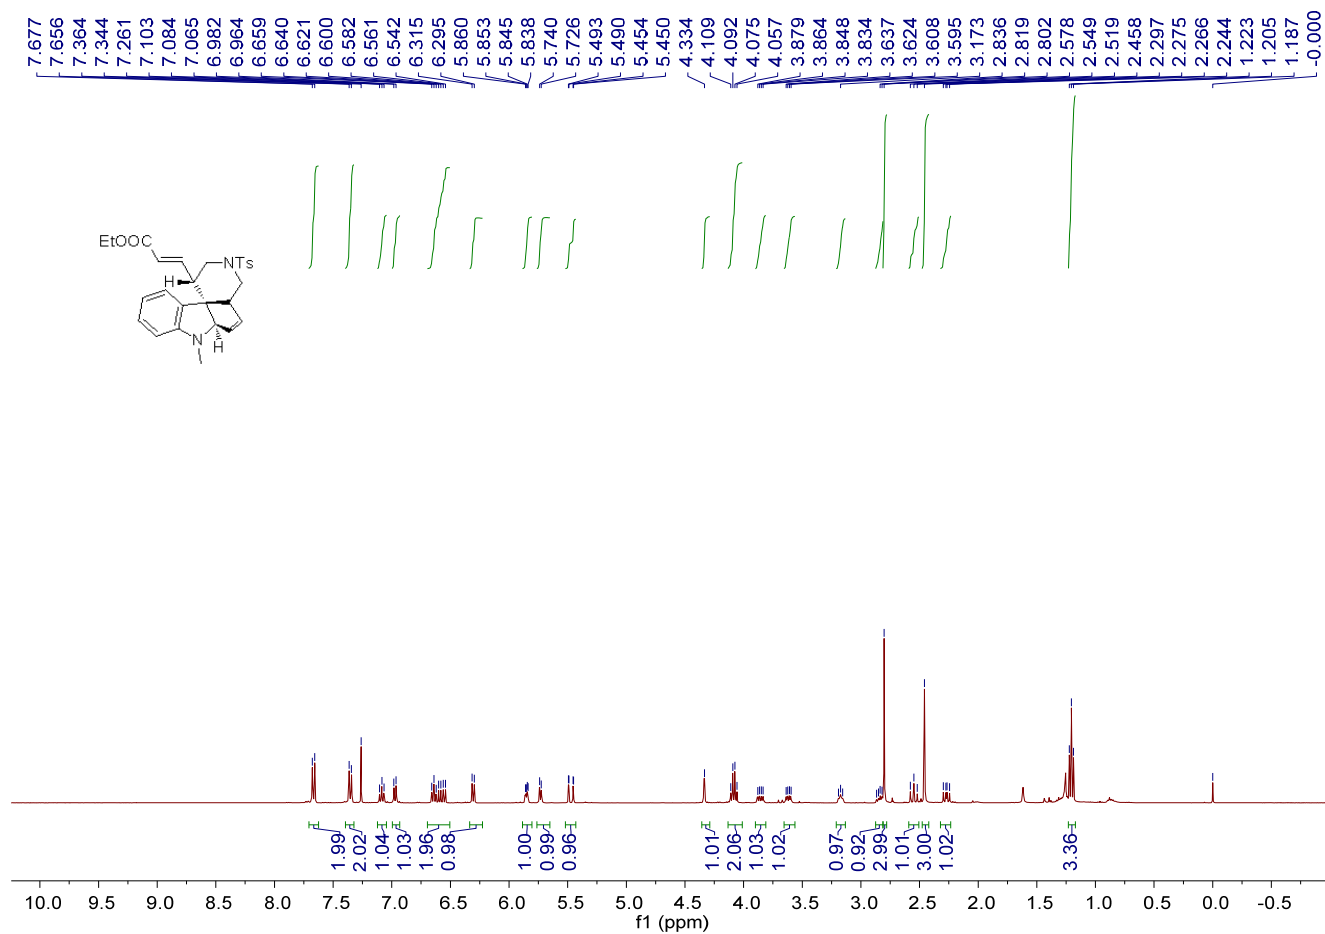

— 165.922  
 150.105  
 145.496  
 143.771  
 135.479  
 134.208  
 133.474  
 129.817  
 129.036  
 128.253  
 127.561  
 122.401  
 122.242  
 117.319  
 — 106.661  
 77.317  
 77.000  
 76.682  
 72.767  
 60.197  
 55.703  
 50.166  
 46.830  
 44.826  
 — 32.460  
 — 21.549  
 — 14.127

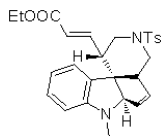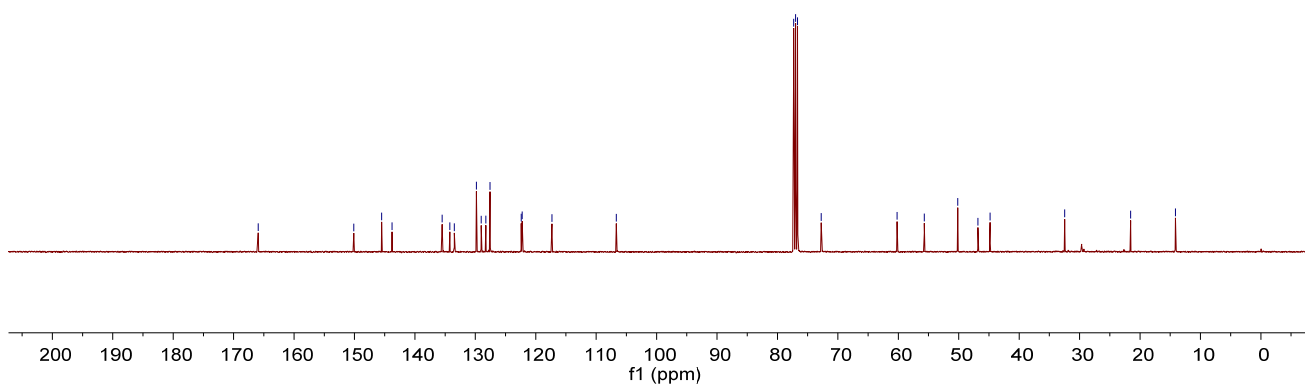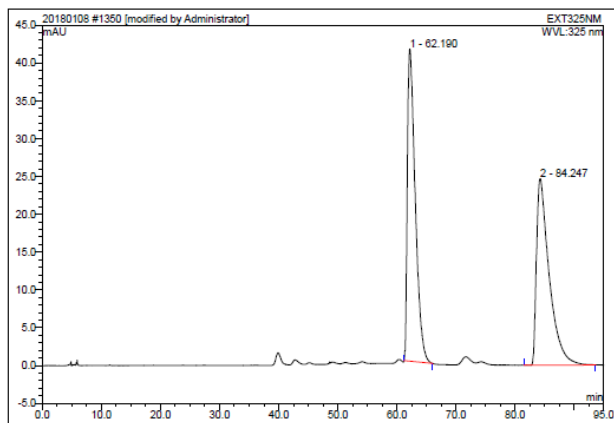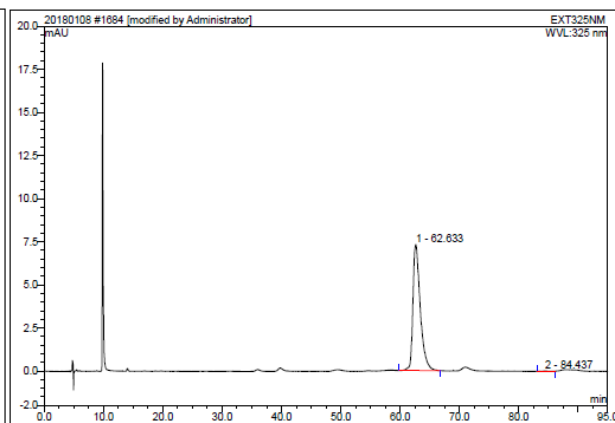

| No.    | Ret.Time<br>min | Peak Name | Height<br>mAU | Area<br>mAU*min | Rel.Area<br>% | Amount | Type |
|--------|-----------------|-----------|---------------|-----------------|---------------|--------|------|
| 1      | 62.19           | n.a.      | 41.267        | 63.832          | 50.98         | n.a.   | BMB* |
| 2      | 84.25           | n.a.      | 24.632        | 61.384          | 49.02         | n.a.   | BMB* |
| Total: |                 |           | 65.899        | 125.216         | 100.00        | 0.000  |      |

| No.    | Ret.Time<br>min | Peak Name | Height<br>mAU | Area<br>mAU*min | Rel.Area<br>% | Amount | Type |
|--------|-----------------|-----------|---------------|-----------------|---------------|--------|------|
| 1      | 62.63           | n.a.      | 7.296         | 10.465          | 99.82         | n.a.   | BMB* |
| 2      | 84.44           | n.a.      | 0.023         | 0.019           | 0.18          | n.a.   | BM*  |
| Total: |                 |           | 7.319         | 10.484          | 100.00        | 0.000  |      |

Translation: Chiralcel IE3 column [ $\lambda = 325$  nm; eluent: Hexane/Isopropanol = 80/20; Flow rate: 0.70 mL/min;  $t_{\text{minor}} = 84.44$  min,  $t_{\text{major}} = 62.63$  min; ee% = 99%].

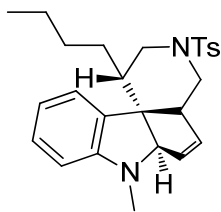

**(1*S*,4*aR*,6*aR*,11*bR*)-1-butyl-7-methyl-3-tosyl-2,3,4,4*a*,6*a*,7-hexahydro-1*H*-pyrido[4',3':2,3]cyclopenta[1,2-*b*]indole 2u**

A white solid, 44% yield (19.2 mg). M.p.: 43-46 °C.  $^1\text{H}$  NMR ( $\text{CDCl}_3$ , TMS, 400 MHz)  $\delta$  0.72 (t,  $J = 7.2$  Hz, 3H), 0.89-1.19 (m, 6H), 1.96 (br, 1H), 2.45 (s, 3H), 2.54 (dd,  $J = 12.0, 12.0$  Hz, 1H), 2.65 (dd,  $J = 12.4, 6.4$  Hz, 1H), 2.82 (s, 3H), 3.07 (br, 1H), 3.49-3.61 (m, 2H), 4.40 (s, 1H), 5.76-5.83 (m, 2H), 6.31 (d,  $J = 8.0$  Hz, 1H), 6.60-6.65 (m, 1H), 6.91 (d,  $J = 7.2$  Hz, 1H), 7.06-7.11 (m, 1H), 7.34 (d,  $J = 8.0$  Hz, 2H), 7.67 (d,  $J = 8.0$  Hz, 2H).  $^{13}\text{C}$  NMR ( $\text{CDCl}_3$ , 100 MHz, TMS)  $\delta$  13.8, 21.6, 22.4, 28.4, 29.4, 32.6, 40.6, 47.4, 48.4, 52.4, 55.8, 73.2, 106.3, 117.1, 122.5, 127.5, 128.5, 129.0, 129.7, 134.0, 135.5, 135.6, 143.4, 150.6. IR ( $\text{CH}_2\text{Cl}_2$ )  $\nu$  2920, 1794, 1601, 1407, 1169, 1090, 965, 871, 712, 661  $\text{cm}^{-1}$ . MS (ESI)  $m/z$  (%): 437.22 (100)  $[\text{M}+\text{H}]^+$ ; HRMS (DART) Calcd. For  $\text{C}_{26}\text{H}_{33}\text{N}_2\text{O}_2\text{S}^+$   $[\text{M}+\text{H}]^+$  requires 437.2257, found: 437.2254. Enantiomeric excess was determined by HPLC with a Chiralcel IC column [ $\lambda = 254$  nm; eluent: Hexane/Isopropanol = 94/6; Flow rate: 0.70 mL/min;  $t_{\text{minor}} = 64.48$  min,  $t_{\text{major}} = 78.27$  min; ee% = 92%;  $[\alpha]_{\text{D}}^{25} = -12.3$  (c 0.10,  $\text{CH}_2\text{Cl}_2$ )].

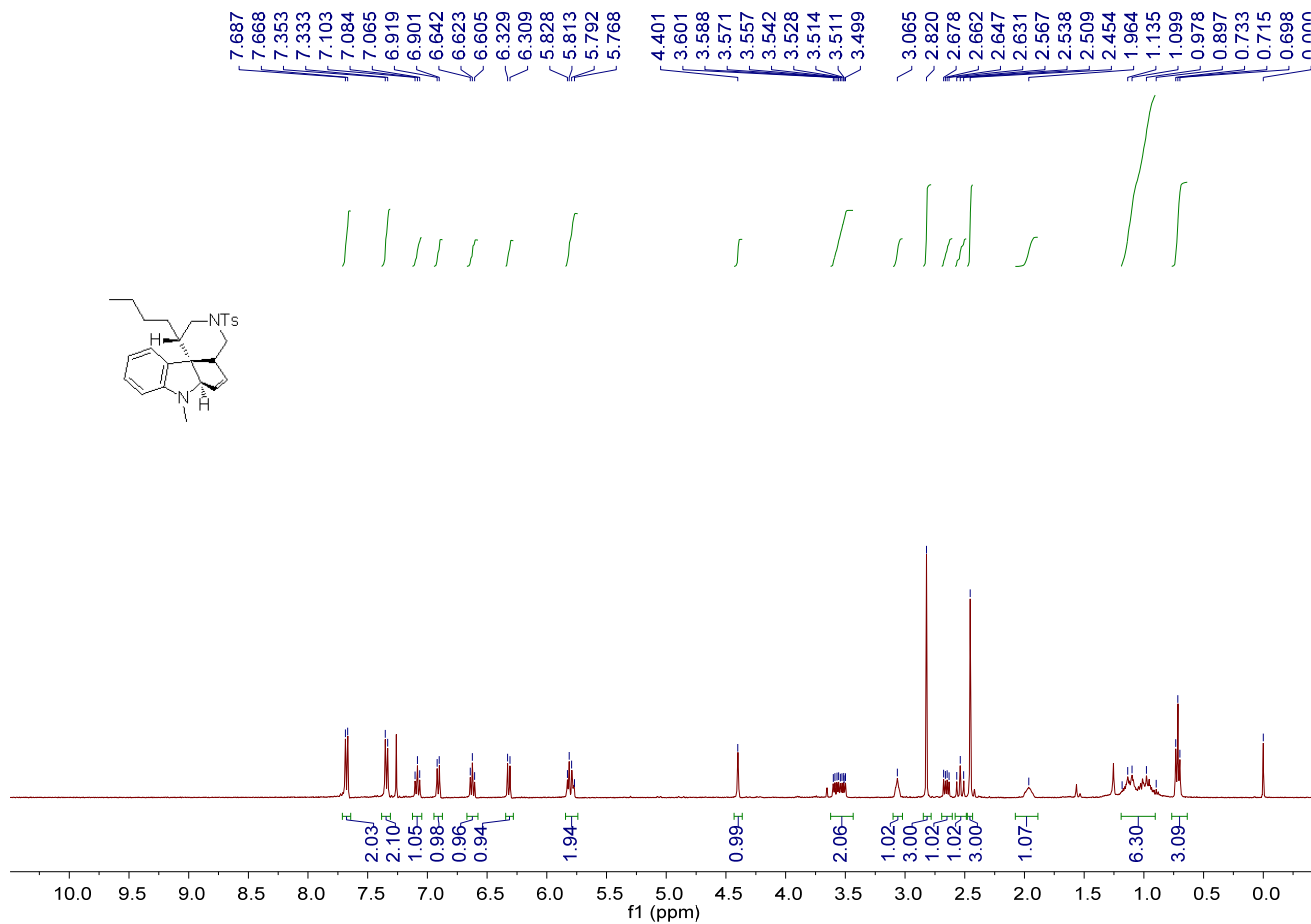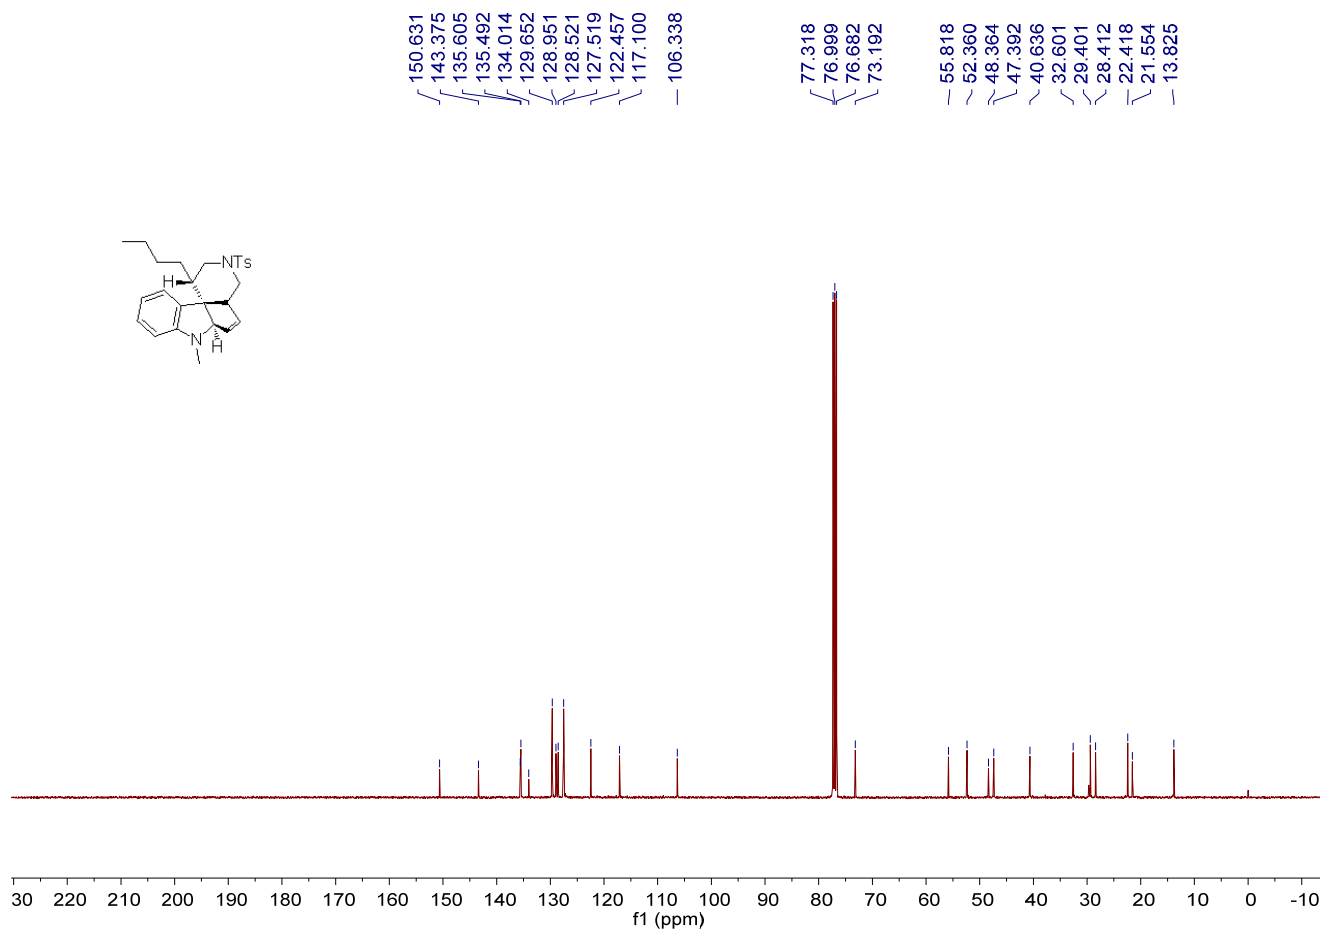

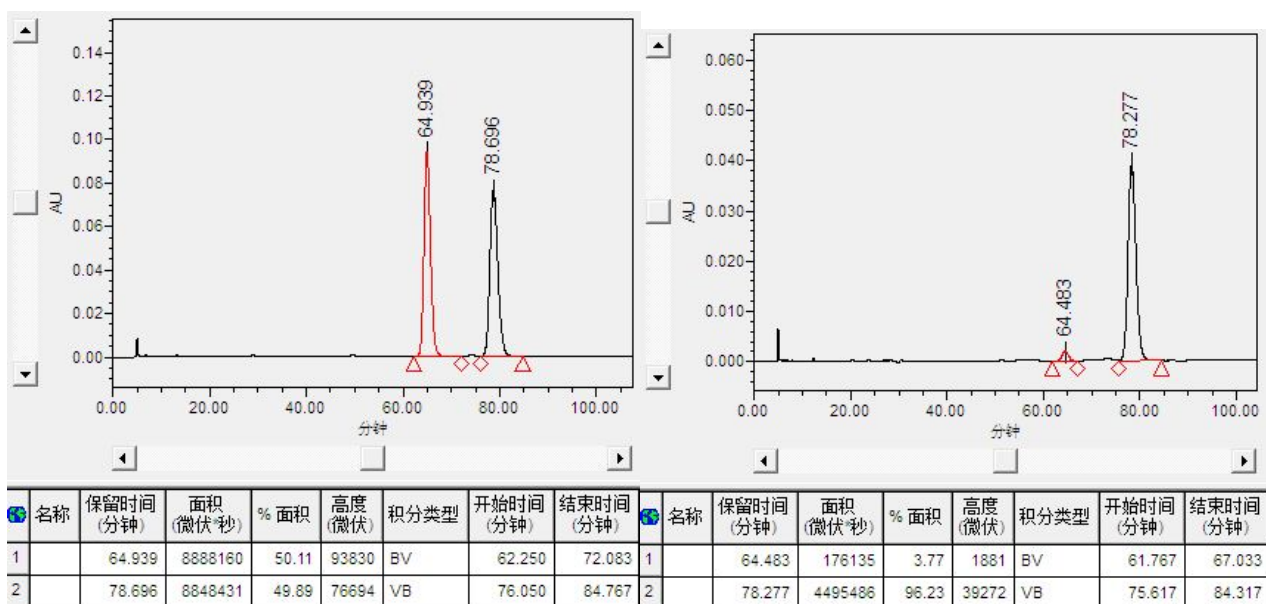

Translation: Chiralcel IC column [ $\lambda = 254$  nm; eluent: Hexane/Isopropanol = 94/6; Flow rate: 0.70 mL/min;  $t_{\text{minor}} = 64.48$  min,  $t_{\text{major}} = 78.27$  min; ee% = 92%].

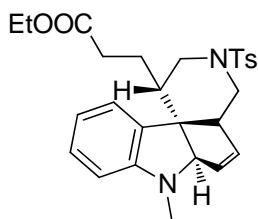

**ethyl 3-((1S,4aR,6aR,11bR)-7-methyl-3-tosyl-2,3,4,4a,6a,7-hexahydro-1H-pyrido[4',3':2,3]cyclopenta[1,2-b]indol-1-yl)propanoate 2v**

A white solid, 43% yield (20.8 mg). M.p.: 55-58 °C.  $^1\text{H}$  NMR ( $\text{CDCl}_3$ , TMS, 400 MHz)  $\delta$  1.18 (t,  $J = 7.2$  Hz, 3H), 1.36-1.52 (m, 1H), 1.95-2.15 (m, 4H), 2.45 (s, 3H), 2.52-2.63 (m, 2H), 2.82 (s, 3H), 3.07 (br, 1H), 3.47 (dd,  $J = 12.0, 5.6$  Hz, 1H), 3.58 (dd,  $J = 12.0, 5.6$  Hz, 1H), 4.02 (q,  $J = 7.2$  Hz, 2H), 4.43 (s, 1H), 5.78-5.83 (m, 2H), 6.32 (d,  $J = 8.0$  Hz, 1H), 6.61-6.66 (m, 1H), 6.91-6.93 (m, 1H), 7.07-7.12 (m, 1H), 7.34 (d,  $J = 8.0$  Hz, 2H), 7.65 (d,  $J = 8.0$  Hz, 2H).  $^{13}\text{C}$  NMR ( $\text{CDCl}_3$ , 100 MHz, TMS)  $\delta$  14.1, 21.6, 24.3, 32.2, 32.5, 40.6, 47.3, 48.5, 52.2, 55.7, 60.3, 73.1, 106.6, 117.3, 122.6, 127.5, 128.7, 128.8, 129.7, 133.9, 135.1, 135.4, 143.5, 150.5, 173.1. IR ( $\text{CH}_2\text{Cl}_2$ )  $\nu$  2922, 2852, 1730, 1602, 1486, 1344, 1160, 1089, 930, 816, 739, 659  $\text{cm}^{-1}$ . MS (ESI)  $m/z$  (%): 481.21 (100)  $[\text{M}+\text{H}]^+$ ; HRMS (ESI) Calcd. For  $\text{C}_{27}\text{H}_{33}\text{N}_2\text{O}_4\text{S}^+$   $[\text{M}+\text{H}]^+$  requires 481.2156, found: 481.2145. Enantiomeric excess was determined by HPLC with a Chiralcel IE3 column [ $\lambda = 309$  nm; eluent: Hexane/Isopropanol = 80/20; Flow rate: 0.70 mL/min;  $t_{\text{minor}} = 65.21$  min,  $t_{\text{major}} = 58.03$  min; ee% = 93%;  $[\alpha]_{\text{D}}^{25} = -58.8$  (c



0.08, CH<sub>2</sub>Cl<sub>2</sub>].

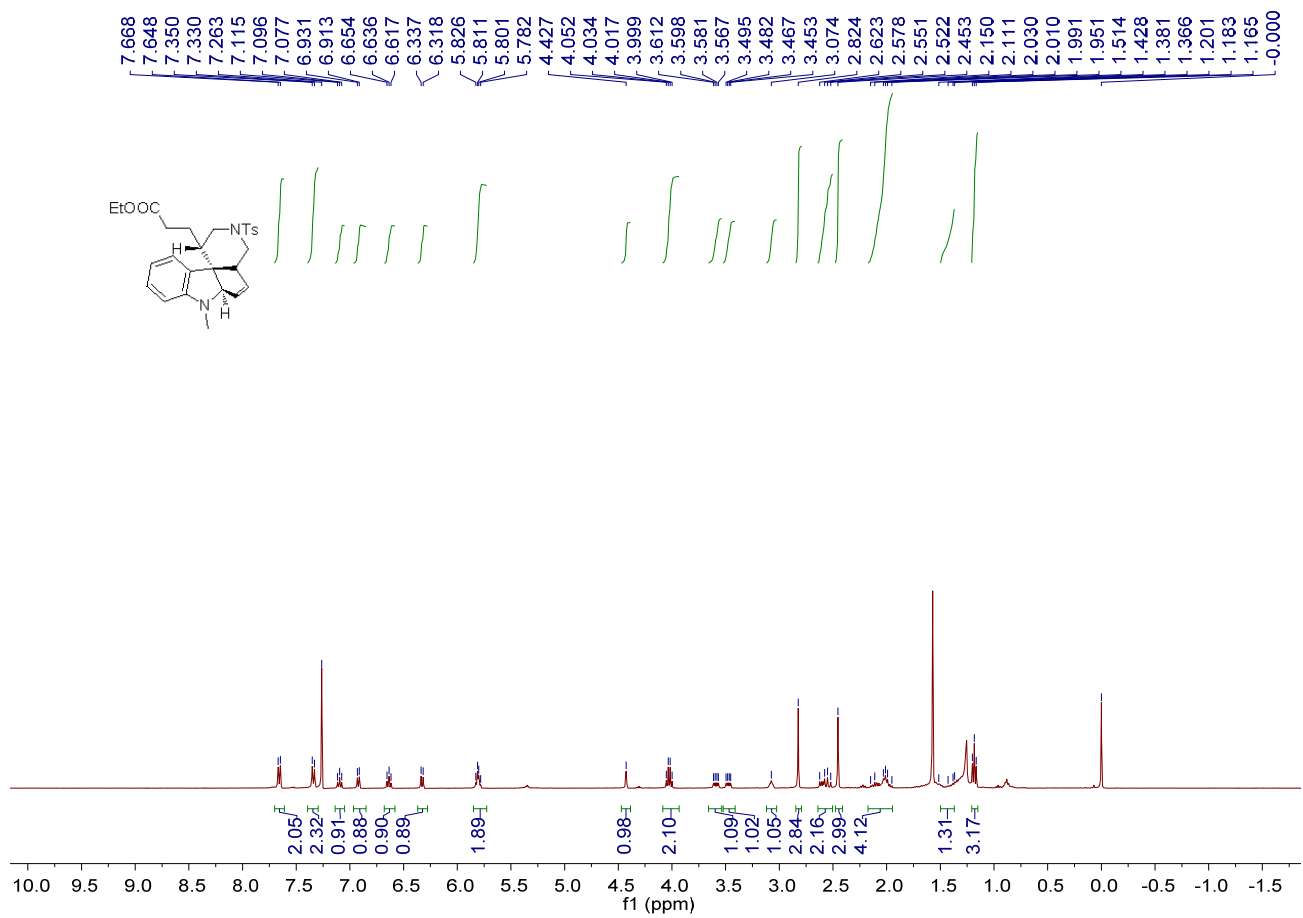

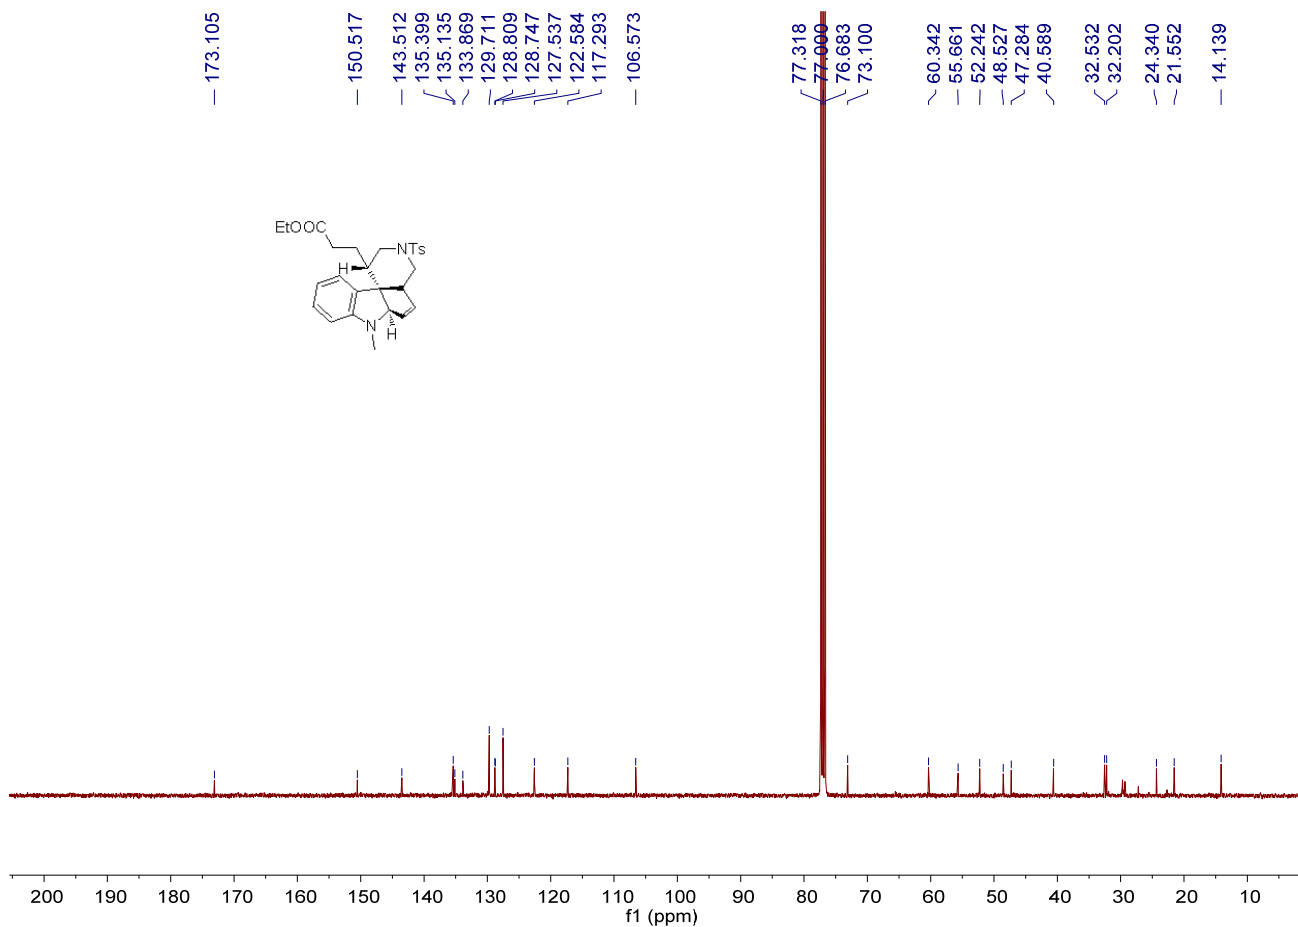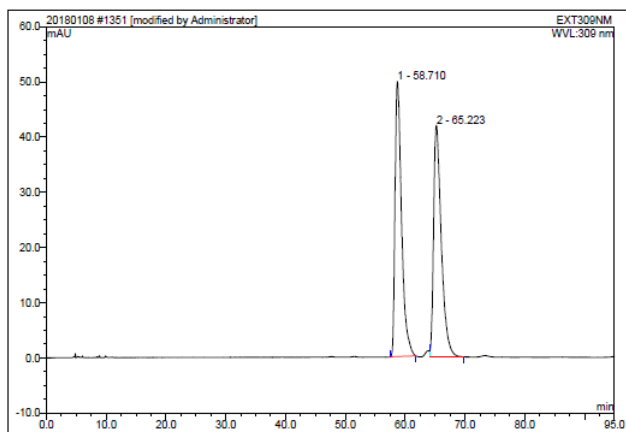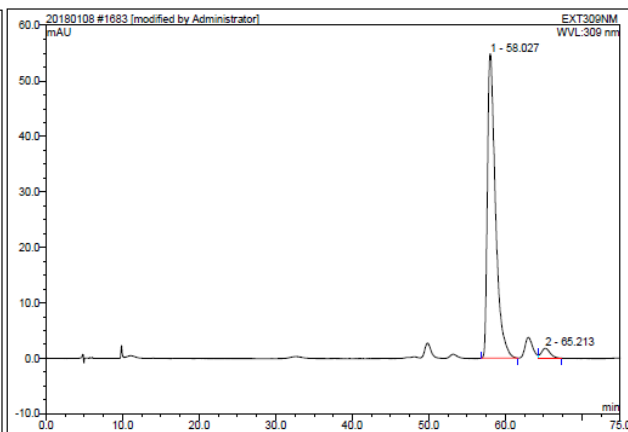

| No.    | Ret.Time min | Peak Name | Height mAU | Area mAU*min | Rel.Area % | Amount | Type |
|--------|--------------|-----------|------------|--------------|------------|--------|------|
| 1      | 58.71        | n.a.      | 49.809     | 63.255       | 50.26      | n.a.   | BMB  |
| 2      | 65.22        | n.a.      | 41.908     | 62.591       | 49.74      | n.a.   | MB*  |
| Total: |              |           | 91.717     | 125.846      | 100.00     | 0.000  |      |

| No.    | Ret.Time min | Peak Name | Height mAU | Area mAU*min | Rel.Area % | Amount | Type |
|--------|--------------|-----------|------------|--------------|------------|--------|------|
| 1      | 58.03        | n.a.      | 54.873     | 67.230       | 96.61      | n.a.   | BMB* |
| 2      | 65.21        | n.a.      | 1.794      | 2.362        | 3.39       | n.a.   | MB*  |
| Total: |              |           | 56.667     | 69.591       | 100.00     | 0.000  |      |

Translation: Chiralcel IE3 column [ $\lambda = 309$  nm; eluent: Hexane/Isopropanol = 80/20; Flow rate: 0.70 mL/min;  $t_{\text{minor}} = 65.21$  min,  $t_{\text{major}} = 58.03$  min; ee% = 93%].

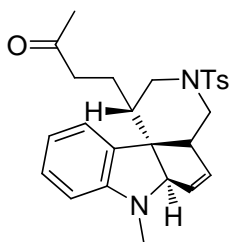

**4-((1*S*,4*aR*,6*aR*,11*bR*)-7-methyl-3-tosyl-2,3,4,4*a*,6*a*,7-hexahydro-1*H*-pyrido[4',3':2,3]cyclopenta[1,2-*b*]indol-1-yl)butan-2-one 2w**

A white liquid, 43% yield (19.4 mg).  $^1\text{H}$  NMR ( $\text{CDCl}_3$ , TMS, 400 MHz)  $\delta$  1.31-1.50 (m, 2H), 1.94 (s, 3H), 1.98-2.24 (m, 3H), 2.45 (s, 3H), 2.48-2.56 (m, 2H), 2.83 (s, 3H), 3.05-3.09 (m, 1H), 3.45 (dd,  $J = 11.6, 5.6$  Hz, 1H), 3.61 (dd,  $J = 12.4, 5.6$  Hz, 1H), 4.43 (s, 1H), 5.78-5.82 (m, 2H), 6.34 (d,  $J = 7.6$  Hz, 1H), 6.63-6.67 (m, 1H), 6.92-6.95 (m, 1H), 7.08-7.13 (m, 1H), 7.34 (d,  $J = 8.0$  Hz, 2H), 7.65 (d,  $J = 8.0$  Hz, 2H).  $^{13}\text{C}$  NMR ( $\text{CDCl}_3$ , 100 MHz, TMS)  $\delta$  21.5, 23.1, 29.7, 32.6, 40.7, 41.6, 47.6, 48.8, 52.1, 55.7, 73.0, 106.7, 117.3, 122.6, 127.5, 128.6, 128.8, 129.7, 133.8, 135.4, 135.5, 143.5, 150.5, 208.4. IR ( $\text{CH}_2\text{Cl}_2$ )  $\nu$  2921, 1716, 1600, 1485, 1340, 1164, 1091, 937, 815, 786, 660  $\text{cm}^{-1}$ . MS (ESI)  $m/z$  (%): 451.20 (100)  $[\text{M}+\text{H}]^+$ ; HRMS (ESI) Calcd. For  $\text{C}_{26}\text{H}_{31}\text{N}_2\text{O}_3\text{S}^+1$   $[\text{M}+\text{H}]^+$  requires 451.2050, found: 451.2035. Enantiomeric excess was determined by HPLC with a Chiralcel IE3 column [ $\lambda = 311$  nm; eluent: Hexane/Isopropanol = 70/30; Flow rate: 0.70 mL/min;  $t_{\text{minor}} = 57.19$  min,  $t_{\text{major}} = 51.27$  min; ee% = 94%;  $[\alpha]_{\text{D}}^{25} = -17.8$  (c 1.10,  $\text{CH}_2\text{Cl}_2$ )].

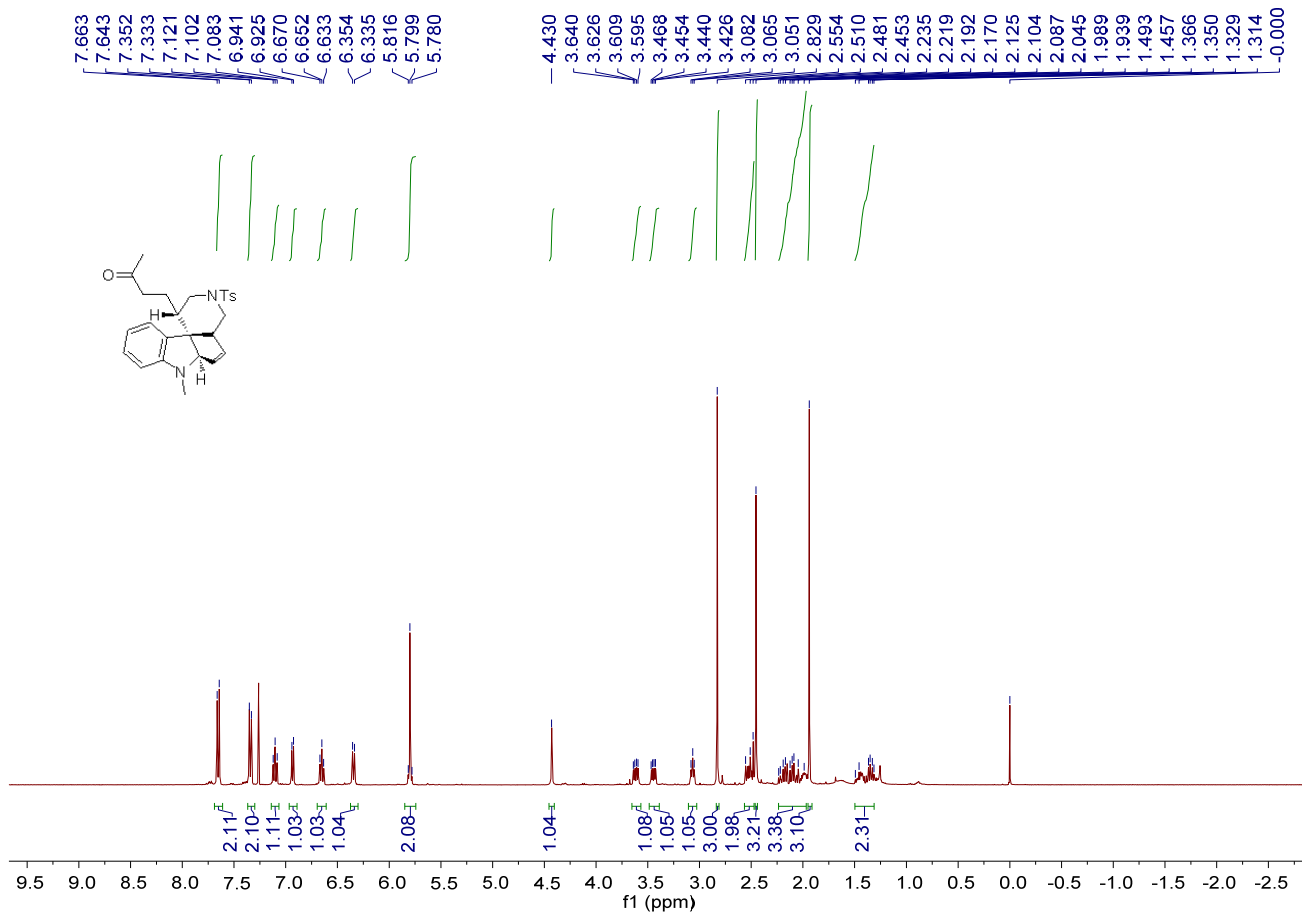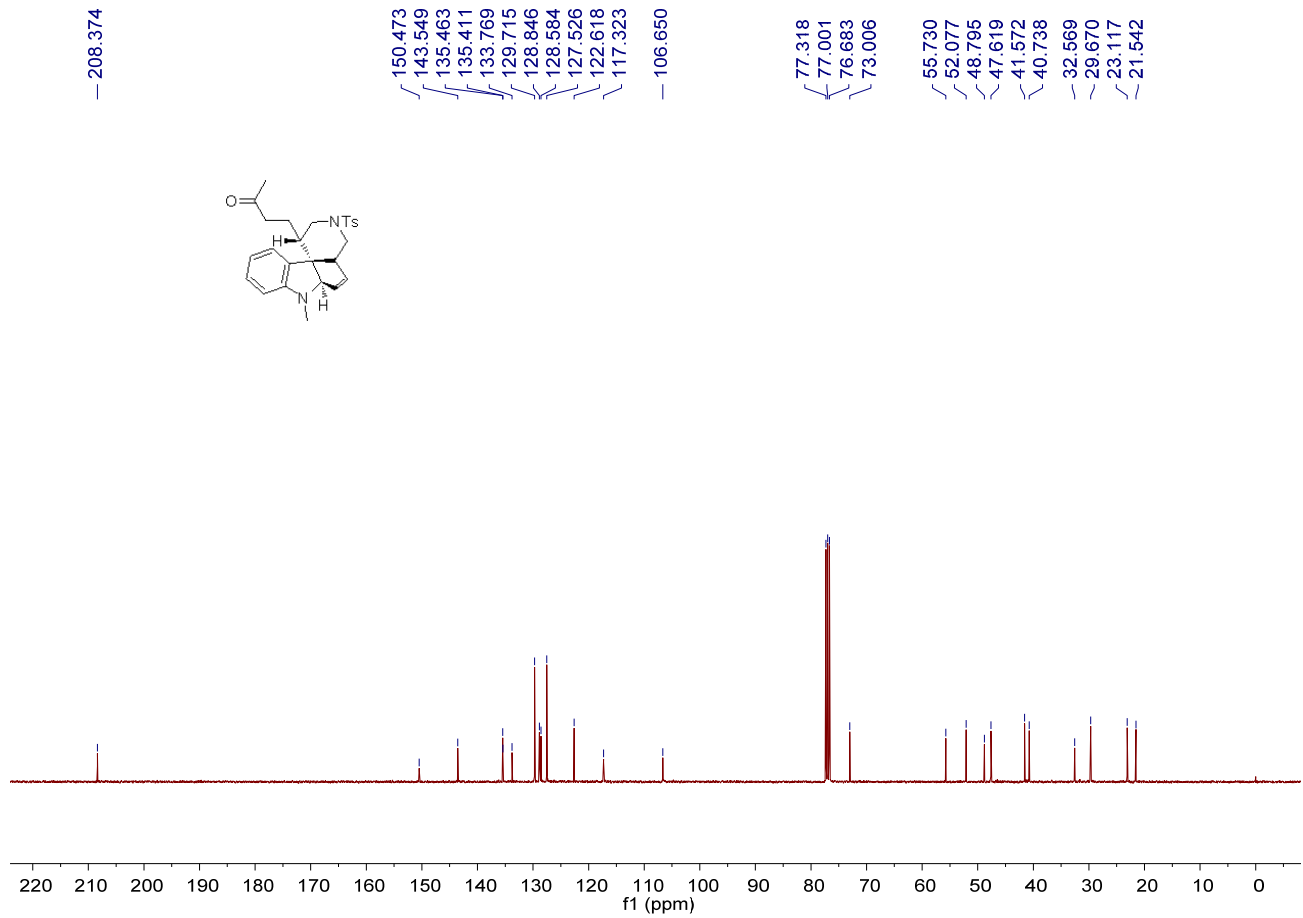

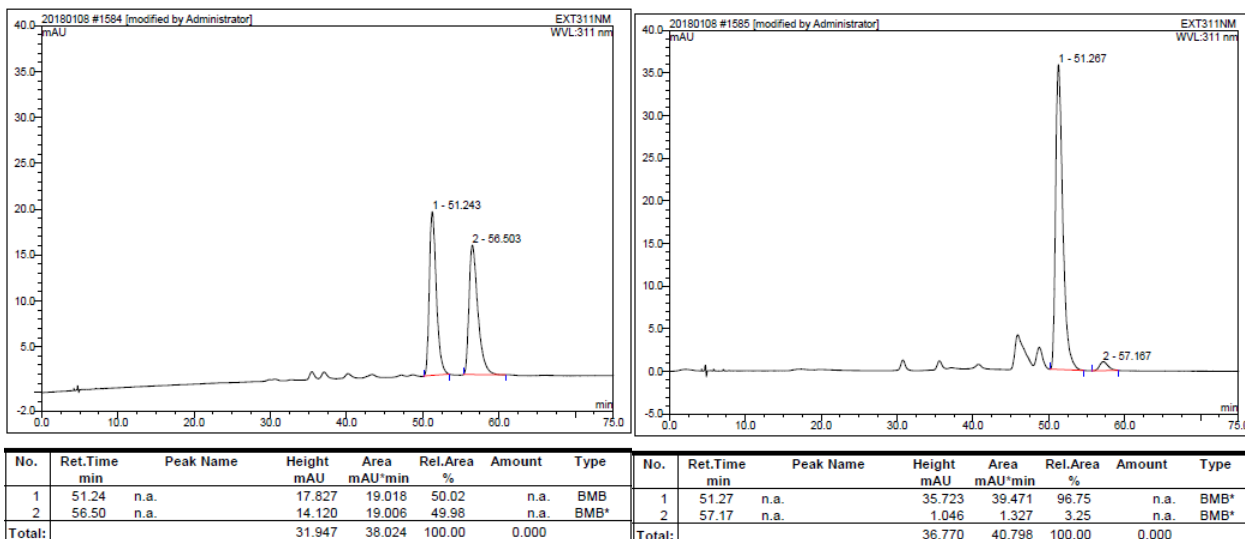

Translation: Chiralcel IE3 column [ $\lambda = 311$  nm; eluent: Hexane/Isopropanol = 70/30; Flow rate: 0.70 mL/min;  $t_{\text{minor}} = 57.19$  min,  $t_{\text{major}} = 51.27$  min; ee% = 94%].

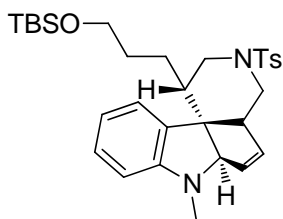

**(1S,4aR,6aR,11bR)-1-(3-((tert-butyldimethylsilyl)oxy)propyl)-7-methyl-3-tosyl-2,3,4,4a,6a,7-hexahydro-1H-pyrido[4',3':2,3]cyclopenta[1,2-b]indole 2x**

A white liquid, 44% yield (24.2 mg).  $^1\text{H}$  NMR ( $\text{CDCl}_3$ , TMS, 400 MHz)  $\delta$  -0.07 (s, 6H), 0.80 (s, 9H), 0.98-1.22 (m, 3H), 1.38-1.48 (m, 1H), 1.94-2.02 (m, 1H), 2.45 (s, 3H), 2.54 (dd,  $J = 11.6, 11.6$  Hz, 1H), 2.63 (dd,  $J = 12.0, 6.4$  Hz, 1H), 2.81 (s, 3H), 3.05-3.09 (m, 1H), 3.34-3.44 (m, 2H), 3.48-3.60 (m, 2H), 4.41 (s, 1H), 5.77-5.83 (m, 2H), 6.29 (d,  $J = 8.0$  Hz, 1H), 6.59-6.64 (m, 1H), 6.90-6.92 (m, 1H), 7.05-7.09 (m, 1H), 7.33 (d,  $J = 8.0$  Hz, 2H), 7.66 (d,  $J = 8.0$  Hz, 2H).  $^{13}\text{C}$  NMR ( $\text{CDCl}_3$ , 100 MHz, TMS)  $\delta$  -5.46, -5.41, 18.2, 21.5, 25.5, 25.9, 30.5, 32.5, 40.9, 47.5, 48.4, 52.2, 55.8, 63.0, 73.2, 106.4, 117.1, 122.5, 127.5, 128.6, 128.9, 129.7, 133.9, 135.4, 135.5, 143.4, 150.5. IR ( $\text{CH}_2\text{Cl}_2$ )  $\nu$  3041, 2927, 2853, 1603, 1491, 1346, 1248, 1157, 1090, 945, 833, 737, 668  $\text{cm}^{-1}$ . MS (ESI)  $m/z$  (%): 553.28 (100)  $[\text{M}+\text{H}]^+$ ; HRMS (ESI) Calcd. For  $\text{C}_{31}\text{H}_{45}\text{N}_2\text{O}_3\text{SSi}^+$   $[\text{M}+\text{H}]^+$  requires 553.2915, found: 553.2898. Enantiomeric excess was determined by HPLC with a Chiralcel IG column [ $\lambda = 214$  nm; eluent: Hexane/Isopropanol = 95/5; Flow rate: 0.70 mL/min;  $t_{\text{minor}} = 28.29$  min,  $t_{\text{major}} = 26.32$  min; ee% =



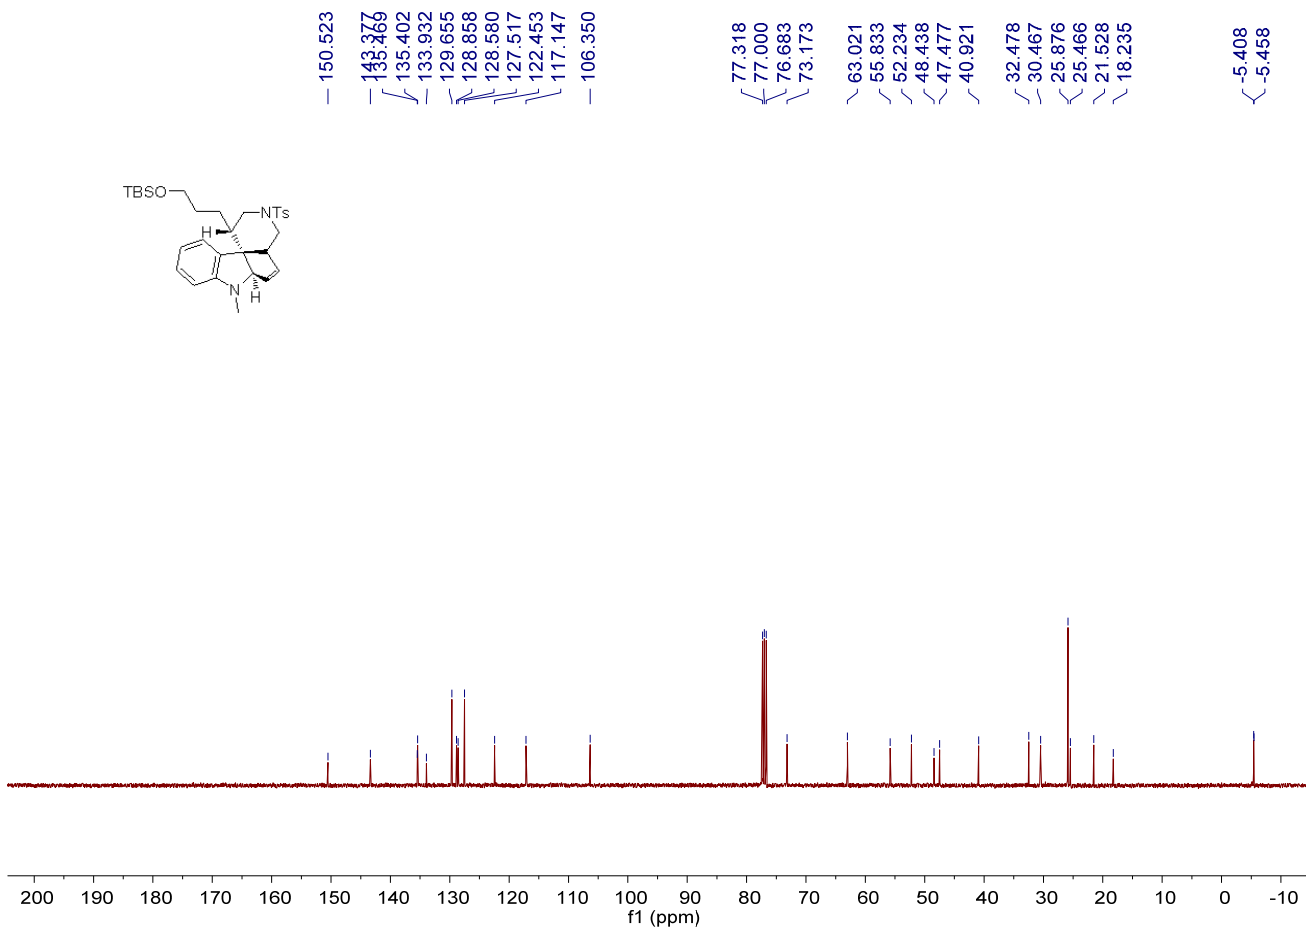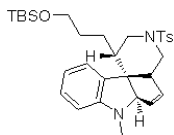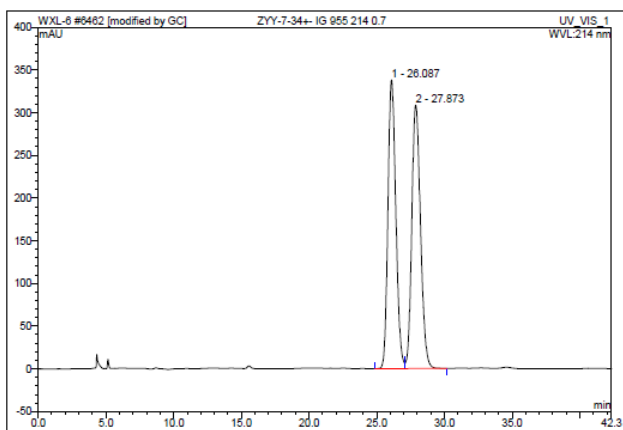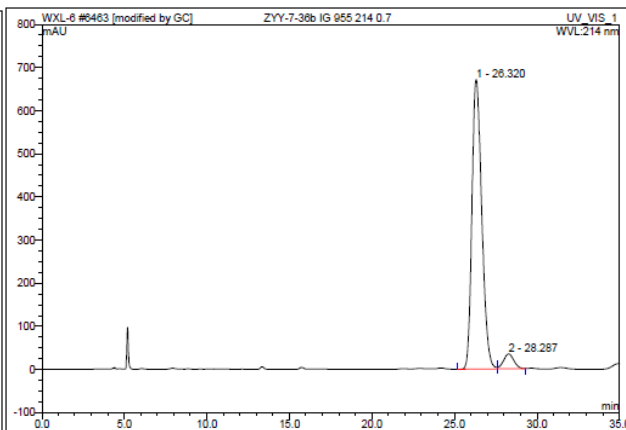

| No.    | Ret.Time min | Peak Name | Height mAU | Area mAU*min | Rel.Area % | Amount | Type |
|--------|--------------|-----------|------------|--------------|------------|--------|------|
| 1      | 26.09        | n.a.      | 338.079    | 228.699      | 49.71      | n.a.   | BM   |
| 2      | 27.87        | n.a.      | 308.778    | 231.332      | 50.29      | n.a.   | MB   |
| Total: |              |           | 646.857    | 460.031      | 100.00     | 0.000  |      |

| No.    | Ret.Time min | Peak Name | Height mAU | Area mAU*min | Rel.Area % | Amount | Type |
|--------|--------------|-----------|------------|--------------|------------|--------|------|
| 1      | 26.32        | n.a.      | 671.712    | 463.259      | 94.89      | n.a.   | BM * |
| 2      | 28.29        | n.a.      | 34.215     | 24.970       | 5.11       | n.a.   | MB*  |
| Total: |              |           | 705.927    | 488.228      | 100.00     | 0.000  |      |

Translation: Chiralcel IG column [ $\lambda = 214$  nm; eluent: Hexane/Isopropanol = 95/5; Flow rate: 0.70 mL/min;  $t_{\text{minor}} = 28.29$  min,  $t_{\text{major}} = 26.32$  min; ee% = 90%]. (Note: In the 5 minute position, there is the peak of dichloromethane, due to that the sample was dissolved in dichloromethane for measuring).

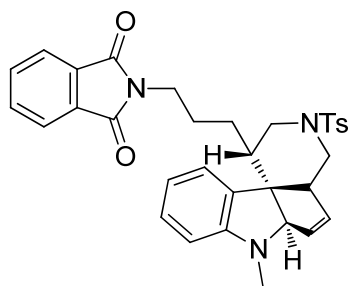

**2-(3-((1*S*,4*aR*,6*aR*,11*bR*)-7-methyl-3-tosyl-2,3,4,4*a*,6*a*,7-hexahydro-1*H*-pyrido[4',3':2,3]cyclopent a[1,2-*b*]indol-1-yl)propyl)isoindoline-1,3-dione 2y**

A white solid, 44% yield (24.9 mg). M.p.: 163-166 °C. <sup>1</sup>H NMR (CDCl<sub>3</sub>, TMS, 400 MHz) δ 1.01-1.22 (m, 2H), 1.26-1.35 (m, 2H), 1.95-2.05 (m, 1H), 2.45 (s, 3H), 2.52-2.63 (m, 2H), 2.76 (s, 3H), 3.03-3.07 (m, 1H), 3.41-3.49 (m, 3H), 3.57 (dd, *J* = 12.4, 5.6 Hz, 1H), 4.38 (s, 1H), 5.76-5.80 (m, 2H), 6.17 (d, *J* = 7.6 Hz, 1H), 6.51-6.56 (m, 1H), 6.86-6.89 (m, 1H), 6.94-6.98 (m, 1H), 7.33 (d, *J* = 8.0 Hz, 2H), 7.66 (d, *J* = 8.0 Hz, 2H), 7.70-7.73 (m, 2H), 7.79-7.82 (m, 2H). <sup>13</sup>C NMR (CDCl<sub>3</sub>, 100 MHz, TMS) δ 21.5, 26.1, 26.4, 32.4, 37.7, 40.7, 47.4, 48.5, 52.0, 55.8, 73.1, 106.3, 117.2, 122.5, 123.1, 127.5, 128.6, 128.8, 129.7, 132.0, 133.8, 134.0, 135.1, 135.4, 143.4, 150.4, 168.2. IR (CH<sub>2</sub>Cl<sub>2</sub>) ν 2924, 2849, 1770, 1601, 1397, 1161, 1090, 934, 877, 786, 660 cm<sup>-1</sup>. MS (ESI) *m/z* (%): 568.22 (100) [M+H]<sup>+</sup>; HRMS (ESI) Calcd. For C<sub>33</sub>H<sub>34</sub>N<sub>3</sub>O<sub>4</sub>S<sup>+</sup> [M+H]<sup>+</sup> requires 568.2265, found: 568.2252. Enantiomeric excess was determined by HPLC with a Chiralcel IG column [λ = 214 nm; eluent: Hexane/Isopropanol = 60/40; Flow rate: 0.70 mL/min; *t*<sub>minor</sub> = 79.14 min, *t*<sub>major</sub> = 66.33 min; ee% = 91%; [α]<sub>D</sub><sup>25</sup> = -15.1 (c 0.5, CH<sub>2</sub>Cl<sub>2</sub>)].



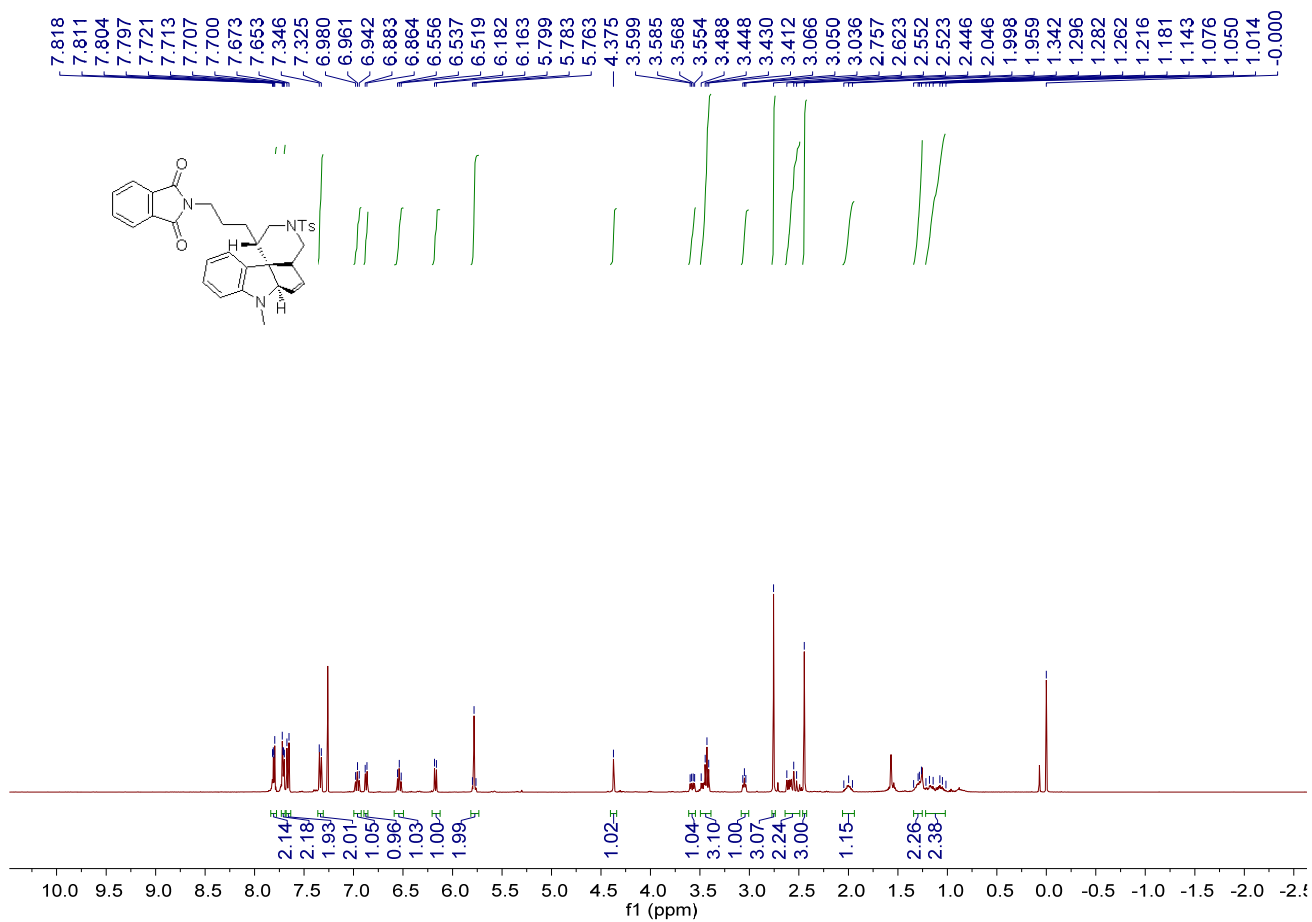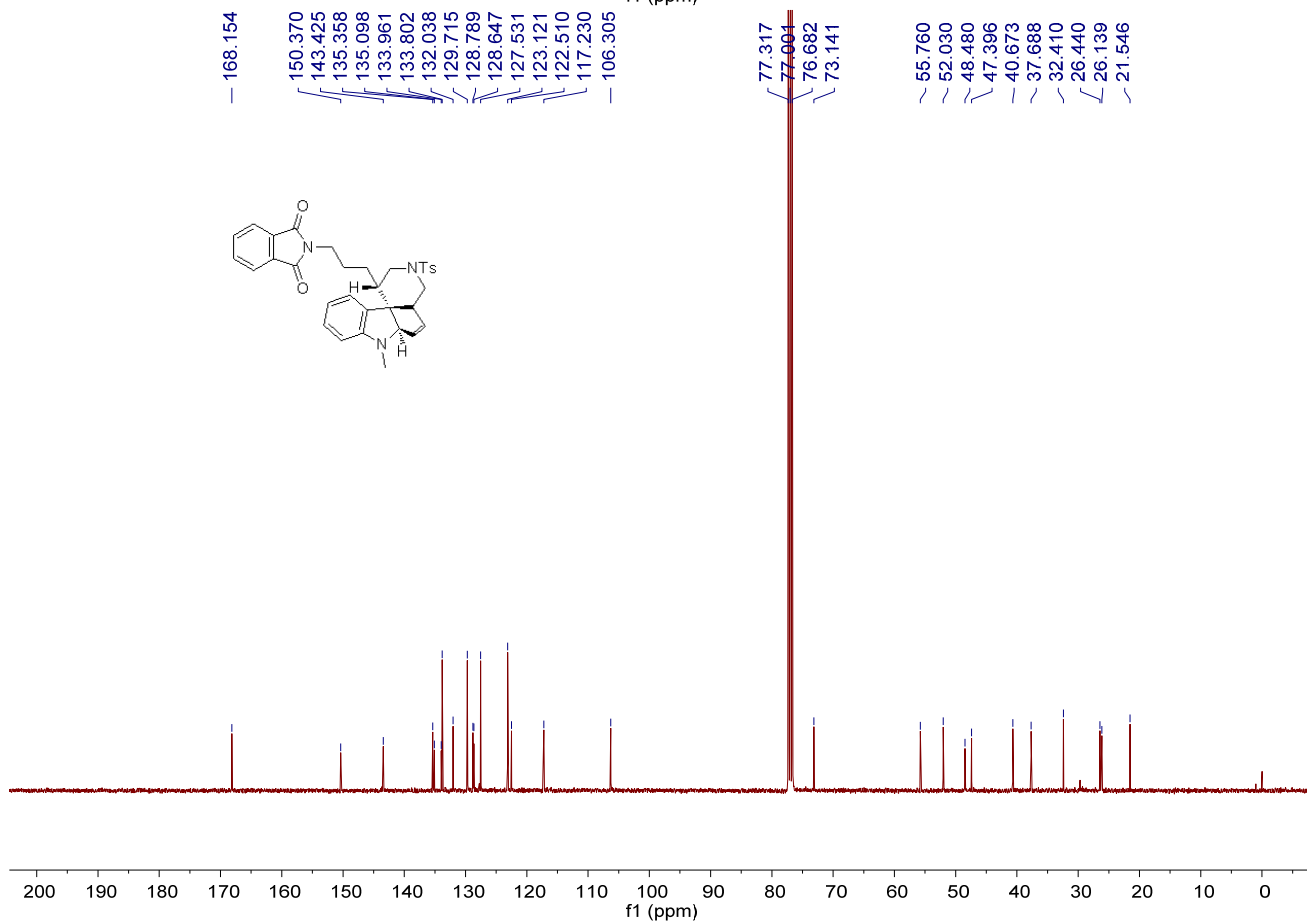

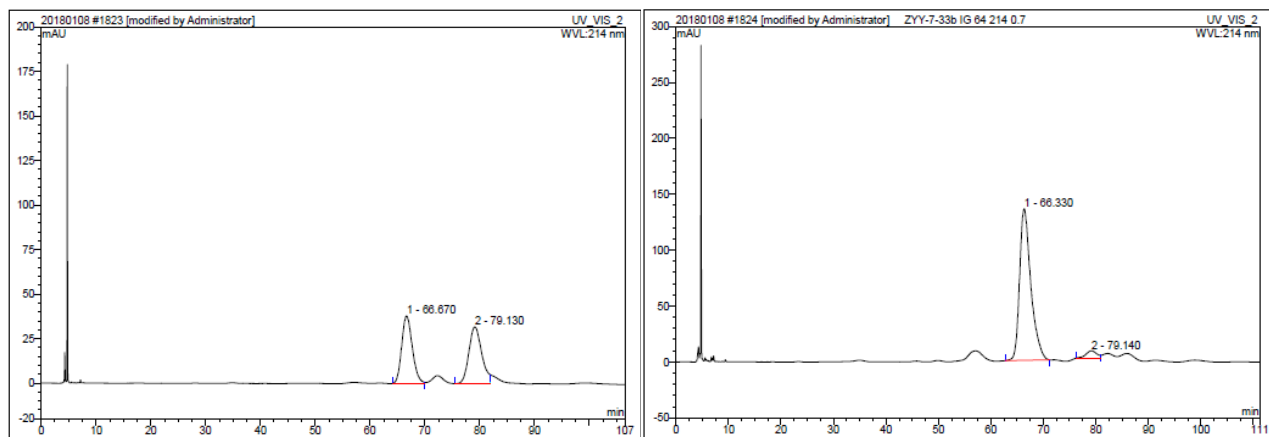

| No.    | Ret.Time min | Peak Name | Height mAU | Area mAU*min | Rel.Area % | Amount | Type |
|--------|--------------|-----------|------------|--------------|------------|--------|------|
| 1      | 66.67        | n.a.      | 37.930     | 84.652       | 49.37      | n.a.   | BM * |
| 2      | 79.13        | n.a.      | 31.931     | 86.822       | 50.63      | n.a.   | BM * |
| Total: |              |           | 69.861     | 171.474      | 100.00     | 0.000  |      |

| No.    | Ret.Time min | Peak Name | Height mAU | Area mAU*min | Rel.Area % | Amount | Type |
|--------|--------------|-----------|------------|--------------|------------|--------|------|
| 1      | 66.33        | n.a.      | 135.482    | 336.292      | 95.67      | n.a.   | BMB  |
| 2      | 79.14        | n.a.      | 6.446      | 15.219       | 4.33       | n.a.   | BM * |
| Total: |              |           | 141.927    | 351.511      | 100.00     | 0.000  |      |

Translation: Chiralcel IG column [ $\lambda = 214$  nm; eluent: Hexane/Isopropanol = 60/40; Flow rate: 0.70 mL/min;  $t_{\text{minor}} = 79.14$  min,  $t_{\text{major}} = 66.33$  min; ee% = 91%]. (Note: In the 5 minute position, there is the peak of dichloromethane, due to that the sample was dissolved in dichloromethane for measuring).

## 8. Characterization and spectra charts for compounds 3 and 4

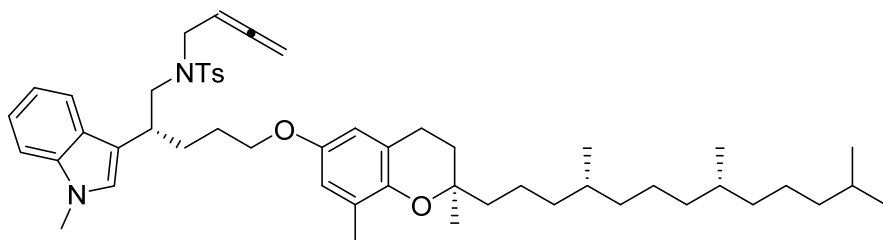

### ***N*-(buta-2,3-dien-1-yl)-*N*-((*R*)-5-(((*R*)-2,8-dimethyl-2-((4*R*,8*R*)-4,8,12-trimethyltridecyl)chroman-6-yl)oxy)-2-(1-methyl-1*H*-indol-3-yl)pentyl)-4-methylbenzenesulfonamide 3**

A white liquid, 43% yield (35.6 mg).  $^1\text{H}$  NMR ( $\text{CDCl}_3$ , TMS, 400 MHz)  $\delta$  0.83-0.88 (m, 12H), 1.02-1.16 (m, 8H), 1.24-1.56 (m, 16H), 1.64-1.84 (m, 5H), 2.04-2.12 (m, 4H), 2.37 (s, 3H), 2.65-2.70 (m, 2H), 3.26-3.37 (m, 2H), 3.52-3.58 (m, 1H), 3.72 (s, 3H), 3.76-3.89 (m, 4H), 4.63-4.66 (m, 2H), 4.73-4.80 (m, 1H), 6.37 (d,  $J = 3.2$  Hz, 1H), 6.50 (d,  $J = 3.2$  Hz, 1H), 6.86 (s, 1H), 7.04-7.09 (m, 1H), 7.18-7.23 (m, 3H), 7.27 (d,  $J = 8.0$  Hz, 1H), 7.57 (d,  $J = 8.0$  Hz, 1H), 7.61 (d,  $J = 8.0$  Hz, 2H).  $^{13}\text{C}$  NMR ( $\text{CDCl}_3$ , 100 MHz, TMS)  $\delta$  16.2, 19.6, 19.7, 21.0, 21.5, 22.6, 22.7, 24.1, 24.4, 24.8, 27.4, 28.0, 28.8, 31.4, 32.68, 32.7, 32.8, 35.3, 37.3, 37.4, 37.5, 39.3, 40.0, 47.1, 52.3, 68.3, 75.5, 76.1, 85.7, 109.3, 111.8, 114.8, 115.4, 118.7, 119.1, 120.9, 121.5, 126.5, 127.0, 127.1, 127.3, 129.5, 137.1, 137.2, 143.0, 146.0, 151.4, 209.3. IR ( $\text{CH}_2\text{Cl}_2$ )  $\nu$  2924, 2866, 1954, 1599, 1469, 1327, 1156, 1090, 1055, 850, 737, 659  $\text{cm}^{-1}$ . MS (ESI)  $m/z$  (%): 823.54 (100)  $[\text{M}+\text{H}]^+$ ; HRMS (ESI) Calcd. For  $\text{C}_{52}\text{H}_{75}\text{N}_2\text{O}_4\text{S}^{+1}$   $[\text{M}+\text{H}]^+$  requires 823.5442, found: 823.5442. Enantiomeric excess was determined by HPLC with a Chiralcel IF3 column [ $\lambda = 214$  nm; eluent: Hexane/Isopropanol = 90/10; Flow rate: 0.70 mL/min;  $t_{\text{minor}} = 19.95$  min,  $t_{\text{major}} = 18.56$  min; ee% = 96%;  $[\alpha]_{\text{D}}^{25} = 35.3$  (c 0.1,  $\text{CH}_2\text{Cl}_2$ )].

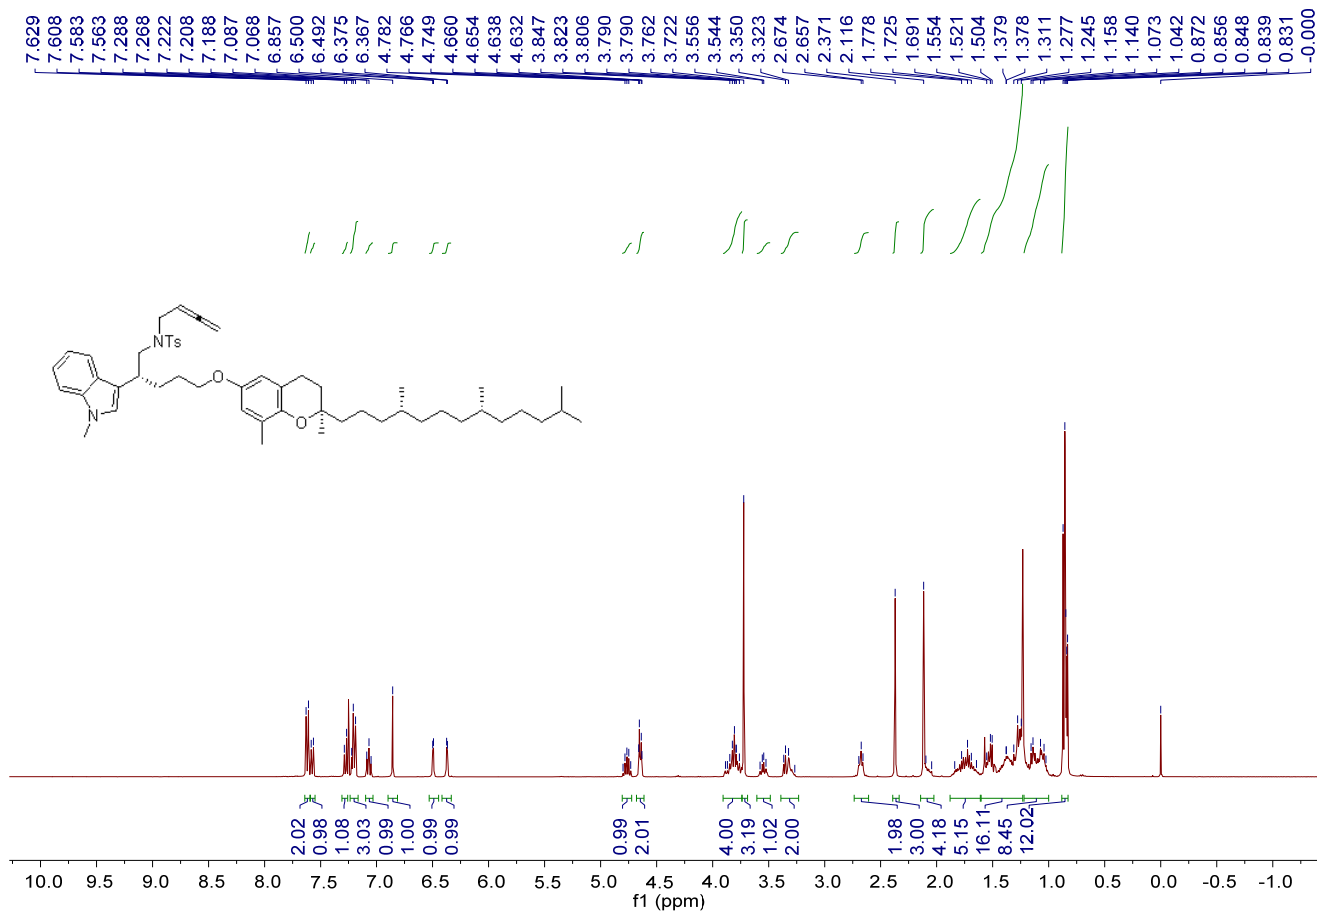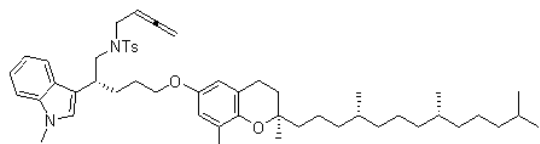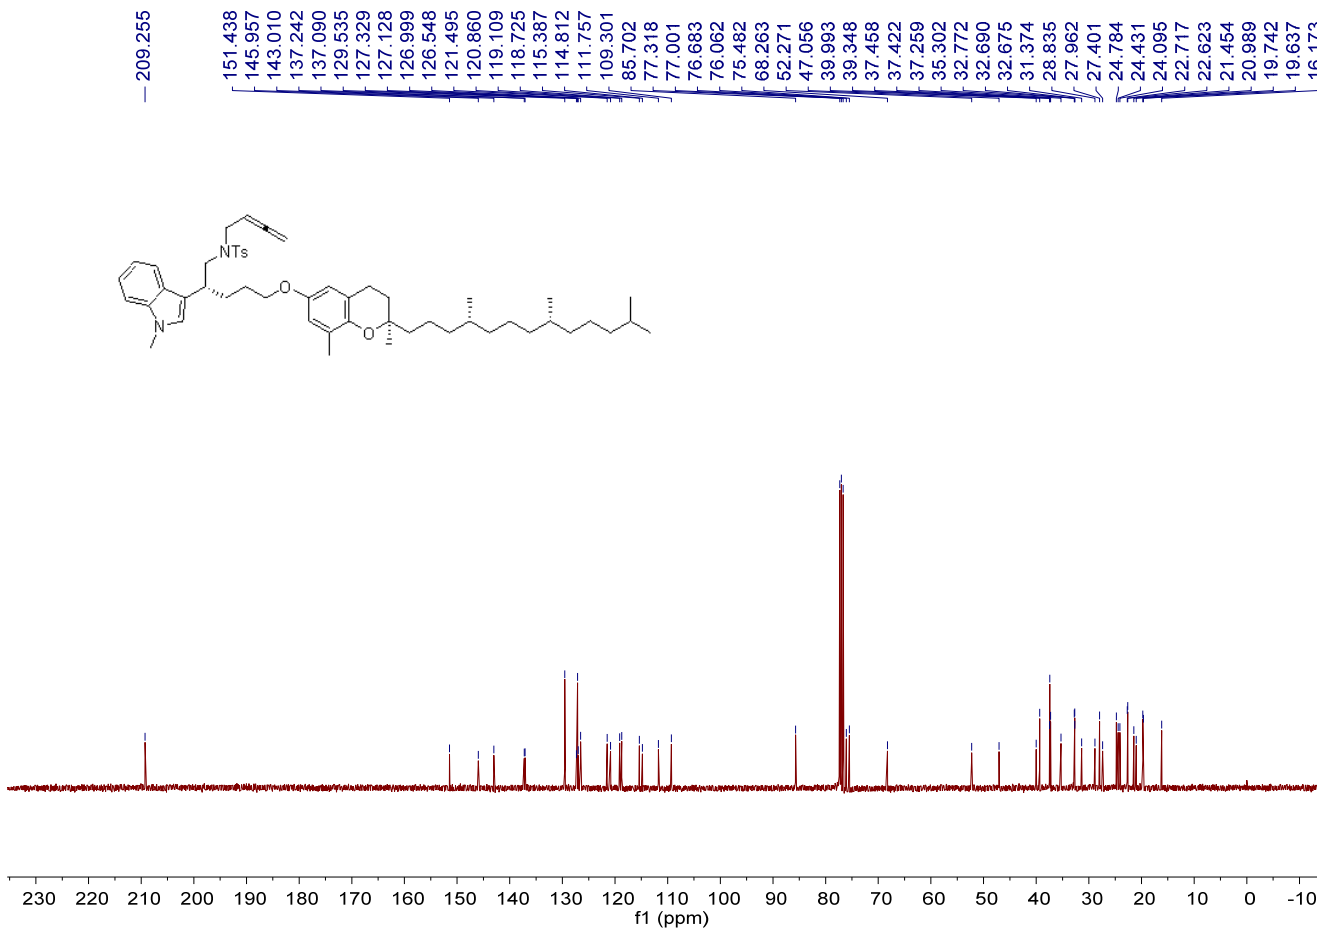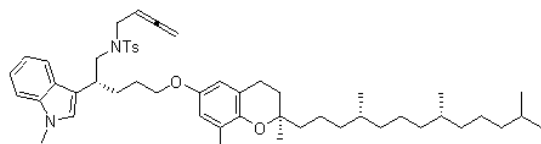

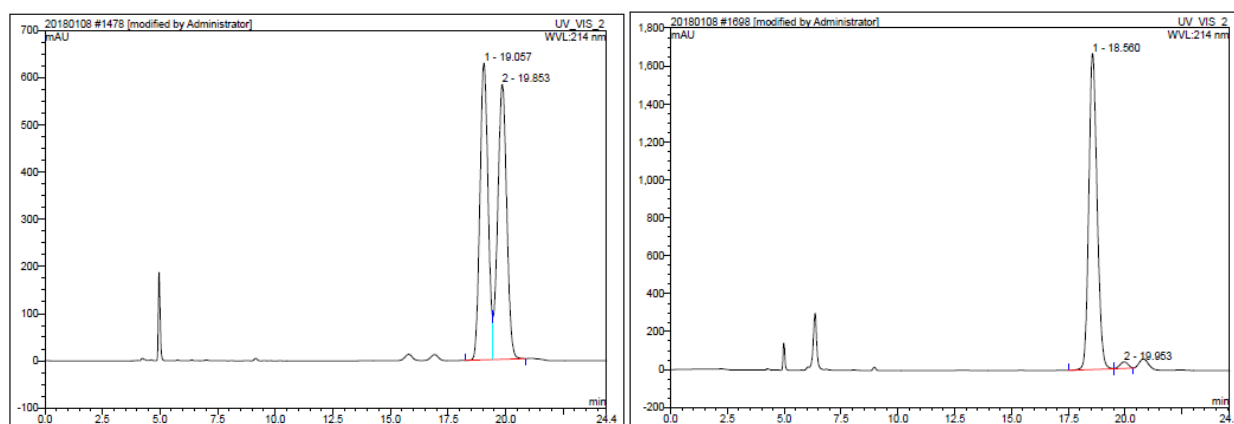

| No.    | Ret.Time min | Peak Name | Height mAU | Area mAU*min | Rel.Area % | Amount | Type |
|--------|--------------|-----------|------------|--------------|------------|--------|------|
| 1      | 19.06        | n.a.      | 628.565    | 257.893      | 49.49      | n.a.   | BM*  |
| 2      | 19.85        | n.a.      | 582.282    | 263.244      | 50.51      | n.a.   | MB*  |
| Total: |              |           | 1210.847   | 521.137      | 100.00     | 0.000  |      |

  

| No.    | Ret.Time min | Peak Name | Height mAU | Area mAU*min | Rel.Area % | Amount | Type |
|--------|--------------|-----------|------------|--------------|------------|--------|------|
| 1      | 18.56        | n.a.      | 1665.647   | 703.881      | 98.03      | n.a.   | BM*  |
| 2      | 19.95        | n.a.      | 34.058     | 14.142       | 1.97       | n.a.   | MB*  |
| Total: |              |           | 1699.705   | 718.023      | 100.00     | 0.000  |      |

Translation: Chiralcel IF3 column [ $\lambda = 214$  nm; eluent: Hexane/Isopropanol = 90/10; Flow rate: 0.70 mL/min;  $t_{\text{minor}} = 19.95$  min,  $t_{\text{major}} = 18.56$  min; ee% = 96%]. (Note: In the 5 minute position, there is the peak of dichloromethane, due to that the sample was dissolved in dichloromethane for measuring).

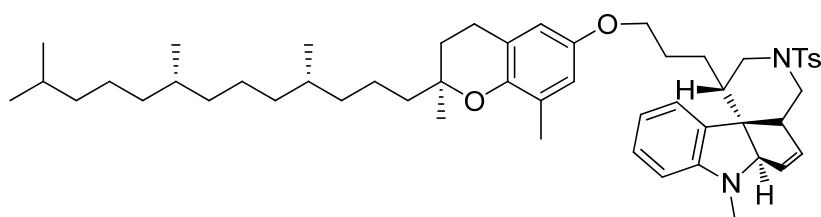

**(1S,4aR,6aR,11bR)-1-(3-(((S)-2,8-dimethyl-2-(((4S,8S)-4,8,12-trimethyltridecyl)chroman-6-yl)oxy)propyl)-7-methyl-3-tosyl-2,3,4,4a,6a,7-hexahydro-1H-pyrido[4',3':2,3]cyclopenta[1,2-b]indole 4**

A white solid, 43% yield (35.5 mg). M.p.: 127-130 °C.  $^1\text{H}$  NMR ( $\text{CDCl}_3$ , TMS, 400 MHz)  $\delta$  0.83-0.88 (m, 12H), 1.01-1.16 (m, 8H), 1.23-1.82 (m, 22H), 1.98-2.07 (m, 1H), 2.11 (s, 3H), 2.45 (s, 3H), 2.57-2.70 (m, 4H), 2.81 (s, 3H), 3.07 (br, 1H), 3.52-3.69 (m, 4H), 4.43 (s, 1H), 5.78-5.85 (m, 2H), 6.29-6.33 (m, 2H), 6.41-6.42 (m, 1H), 6.60-6.64 (m, 1H), 6.89-6.92 (m, 1H), 7.06-7.11 (m, 1H), 7.33 (d,  $J = 8.0$  Hz, 2H), 7.66 (d,  $J = 8.0$  Hz, 2H).  $^{13}\text{C}$  NMR ( $\text{CDCl}_3$ , 100 MHz, TMS)  $\delta$  16.2, 19.6, 19.7, 21.0, 21.5, 22.6, 22.7, 24.1, 24.4, 24.8, 25.6, 27.3, 28.0, 31.3, 32.6, 32.7, 32.8, 37.3, 37.42, 37.45, 39.4, 40.0, 40.8, 47.5, 48.4, 52.4, 55.8, 68.1, 73.2, 75.5, 106.4, 111.7, 115.4, 117.2, 120.8, 122.5, 127.0, 127.5, 128.6, 128.9, 129.7, 134.0, 135.4, 143.4, 146.0, 150.6, 151.2. IR ( $\text{CH}_2\text{Cl}_2$ )  $\nu$  2922, 2849, 1603, 1486, 1468, 1338, 1260, 1156, 1012, 935, 812, 738, 659  $\text{cm}^{-1}$ . MS (ESI)  $m/z$  (%): 823.54 (100)  $[\text{M}+\text{H}]^+$ ; HRMS (ESI) Calcd. For  $\text{C}_{52}\text{H}_{75}\text{N}_2\text{O}_4\text{S}^+$   $[\text{M}+\text{H}]^+$  requires 823.5442, found: 823.5445.



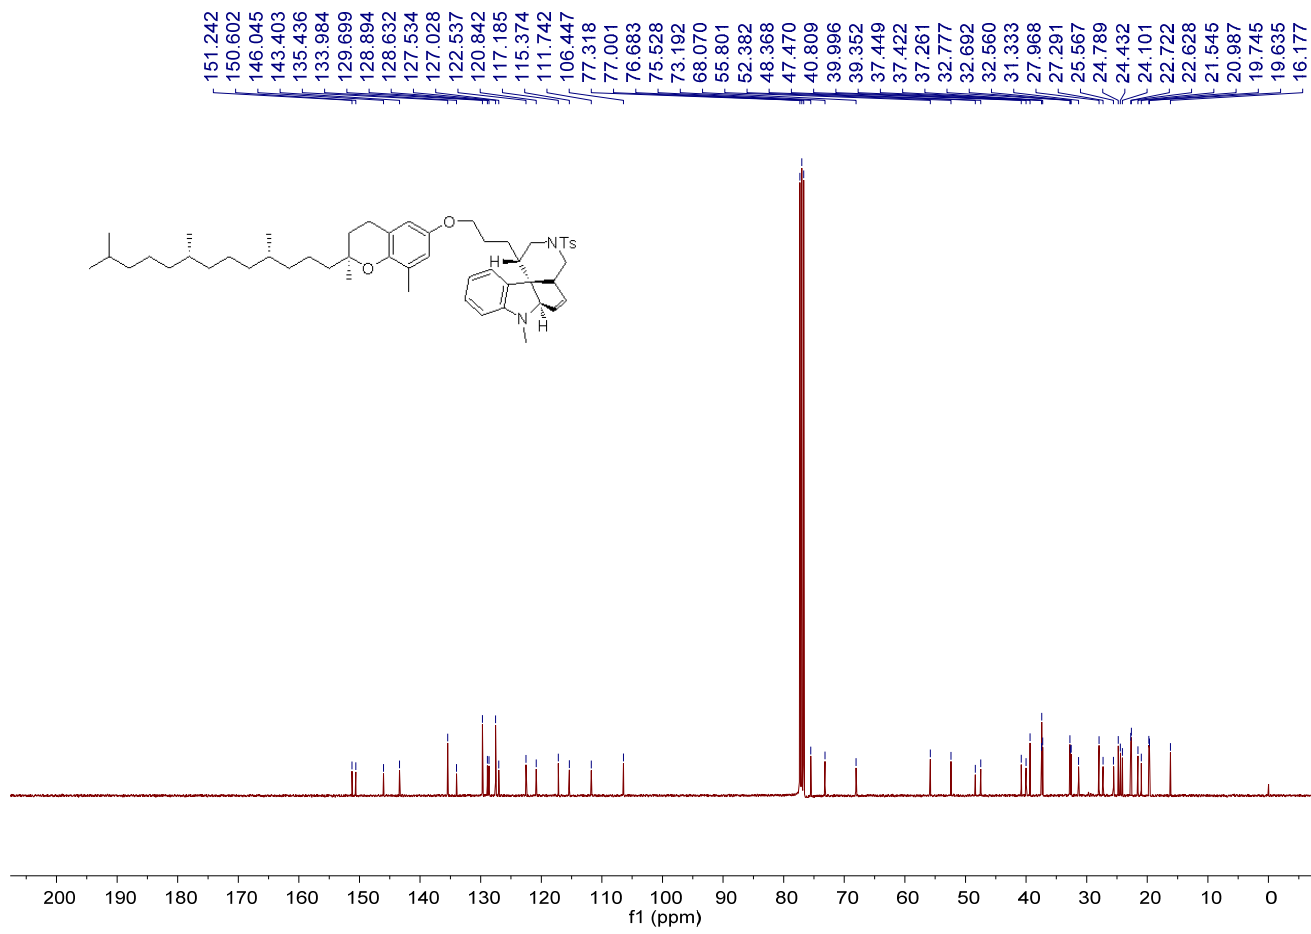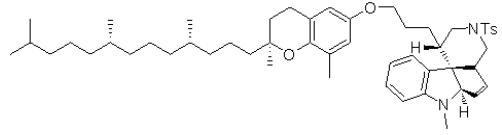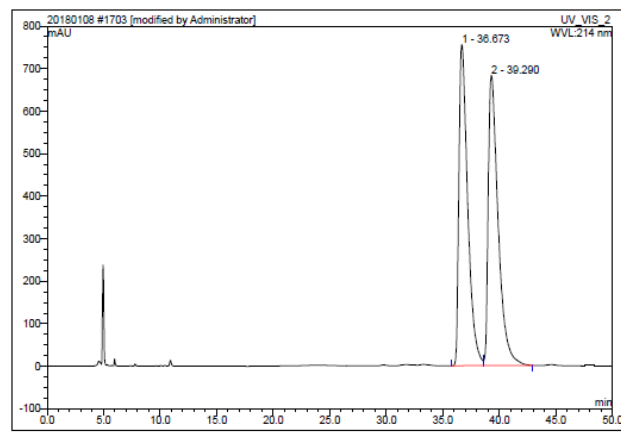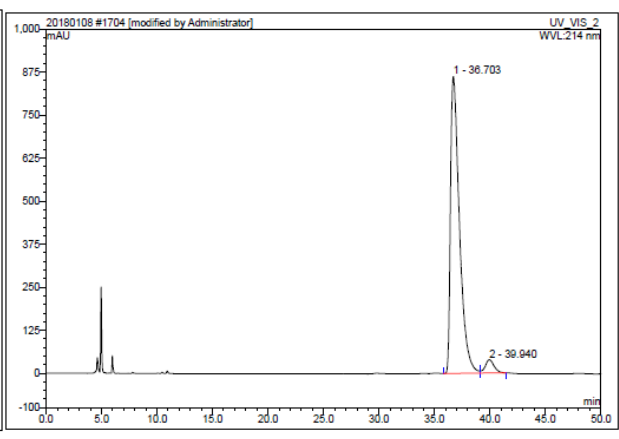

| No.    | Ret.Time min | Peak Name | Height mAU | Area mAU*min | Rel.Area % | Amount | Type |
|--------|--------------|-----------|------------|--------------|------------|--------|------|
| 1      | 36.67        | n.a.      | 755.397    | 682.374      | 49.53      | n.a.   | BM   |
| 2      | 39.29        | n.a.      | 682.851    | 695.263      | 50.47      | n.a.   | MB   |
| Total: |              |           | 1438.248   | 1377.638     | 100.00     | 0.000  |      |

| No.    | Ret.Time min | Peak Name | Height mAU | Area mAU*min | Rel.Area % | Amount | Type |
|--------|--------------|-----------|------------|--------------|------------|--------|------|
| 1      | 36.70        | n.a.      | 862.582    | 804.672      | 95.76      | n.a.   | BM   |
| 2      | 39.94        | n.a.      | 38.603     | 35.589       | 4.24       | n.a.   | MB   |
| Total: |              |           | 901.185    | 840.261      | 100.00     | 0.000  |      |

Translation: Chiralcel IE3 column [ $\lambda = 214$  nm; eluent: Hexane/Isopropanol = 90/10; Flow rate: 0.70 mL/min;  $t_{\text{minor}} = 39.94$  min,  $t_{\text{major}} = 36.70$  min; ee% = 92%]. (Note: In the 5 minute position, there is the peak of dichloromethane, due to that the sample was dissolved in dichloromethane for measuring).

## 9. General procedure for the synthesis of 5, 6, 7 and 8 and their characterization and spectra

### Charts

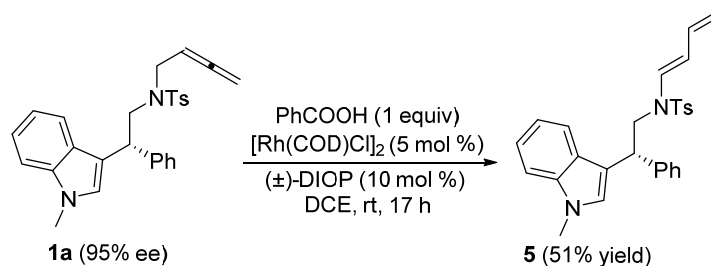

To an oven-dried reaction tube was sequentially added  $[\text{Rh}(\text{COD})\text{Cl}]_2$  (0.005 mmol),  $(\pm)$ -DIOP (0.01 mmol) and benzoic acid (0.1 mmol), and the tube was evacuated and backfilled with argon for three times. Then, **1a** (0.10 mmol) in 1,2-dichloroethane (1.00 mL) was added into tube under an argon atmosphere. The resulting mixture was stirred at room temperature. When the reaction was complete as monitored by TLC, the solution was concentrated under reduced pressure and the crude residue was purified via a silica gel flash column chromatography (PE/EA = 10/1) to give the corresponding product **5**.

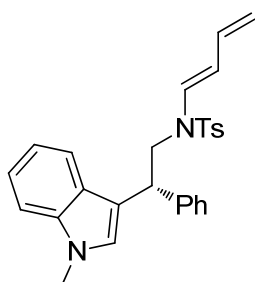

### **(*R,E*)-*N*-(buta-1,3-dien-1-yl)-4-methyl-*N*-(2-(1-methyl-1*H*-indol-3-yl)-2-phenylethyl)benzenesulfonamide 5**

A white liquid, 51% yield (23.2 mg).  $^1\text{H}$  NMR ( $\text{CDCl}_3$ , TMS, 400 MHz)  $\delta$  2.37 (s, 3H), 3.77 (s, 3H), 3.88 (dd,  $J = 14.0, 8.0$  Hz, 1H), 4.04 (dd,  $J = 14.0, 8.0$  Hz, 1H), 4.71 (t,  $J = 7.6$  Hz, 1H), 4.90-5.00 (m, 2H), 5.57 (dd,  $J = 14.0, 10.0$  Hz, 1H), 6.17-6.27 (m, 1H), 6.67 (d,  $J = 14.0$  Hz, 1H), 6.98-7.03 (m, 1H), 7.11 (s, 1H), 7.15-7.22 (m, 4H), 7.26-7.39 (m, 6H), 7.52 (d,  $J = 8.0$  Hz, 1H).  $^{13}\text{C}$  NMR ( $\text{CDCl}_3$ , 100 MHz, TMS)  $\delta$  21.5, 32.8, 40.3, 50.8, 109.2, 114.4, 114.7, 115.2, 118.9, 119.4, 121.7, 126.6, 126.7, 126.9, 127.4, 128.3, 128.4, 129.7, 129.9, 134.6, 135.6, 137.1, 141.9, 143.7. IR ( $\text{CH}_2\text{Cl}_2$ )  $\nu$  2920, 1949, 1599, 1474, 1334, 1160, 1093, 1010, 903, 858, 750, 659  $\text{cm}^{-1}$ . MS (ESI)  $m/z$  (%): 457.19 (100)  $[\text{M}+\text{H}]^+$ ; HRMS (ESI) Calcd. For  $\text{C}_{28}\text{H}_{29}\text{N}_2\text{O}_2\text{S}^+ [\text{M}+\text{H}]^+$  requires 457.1944, found: 457.1941.



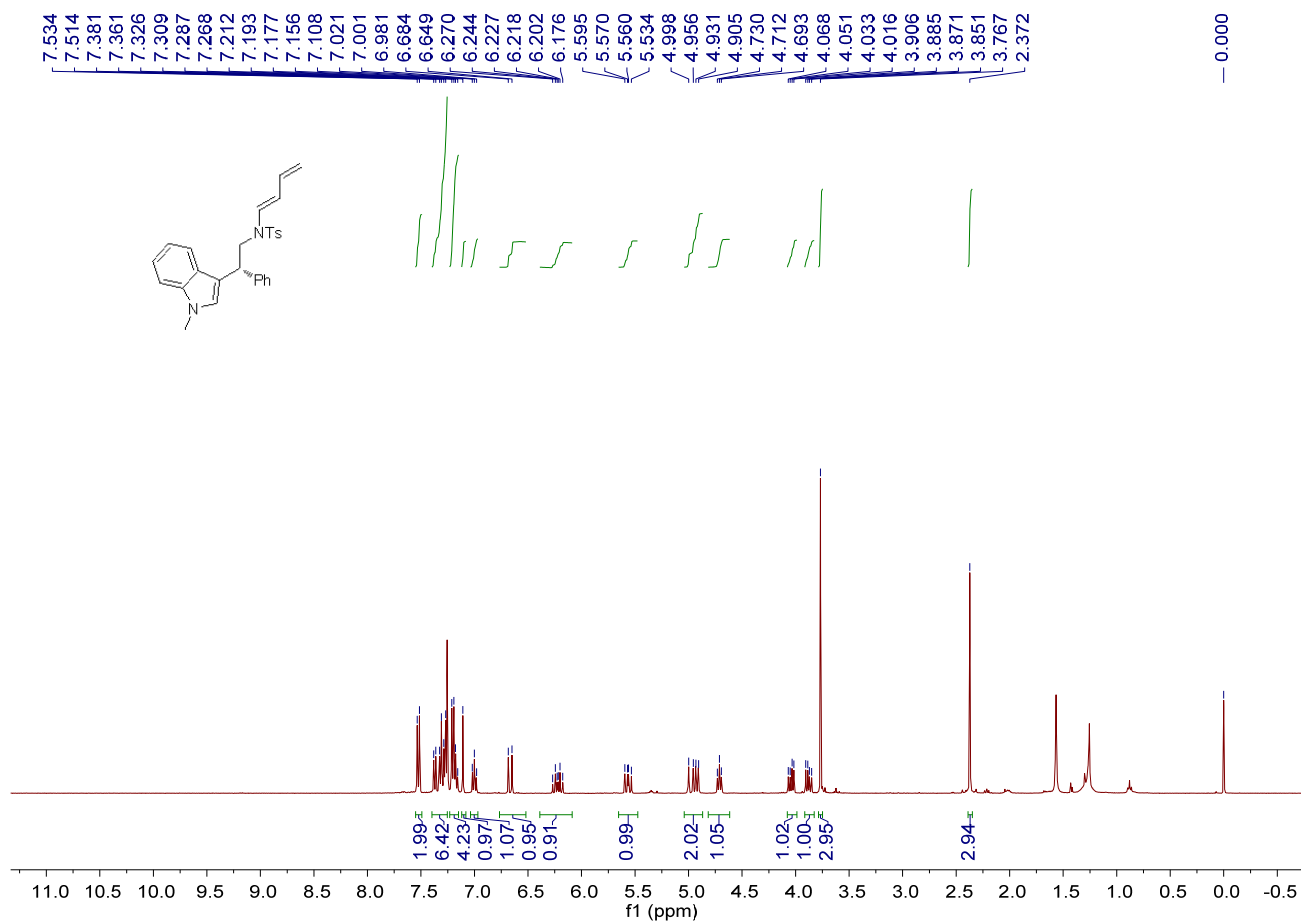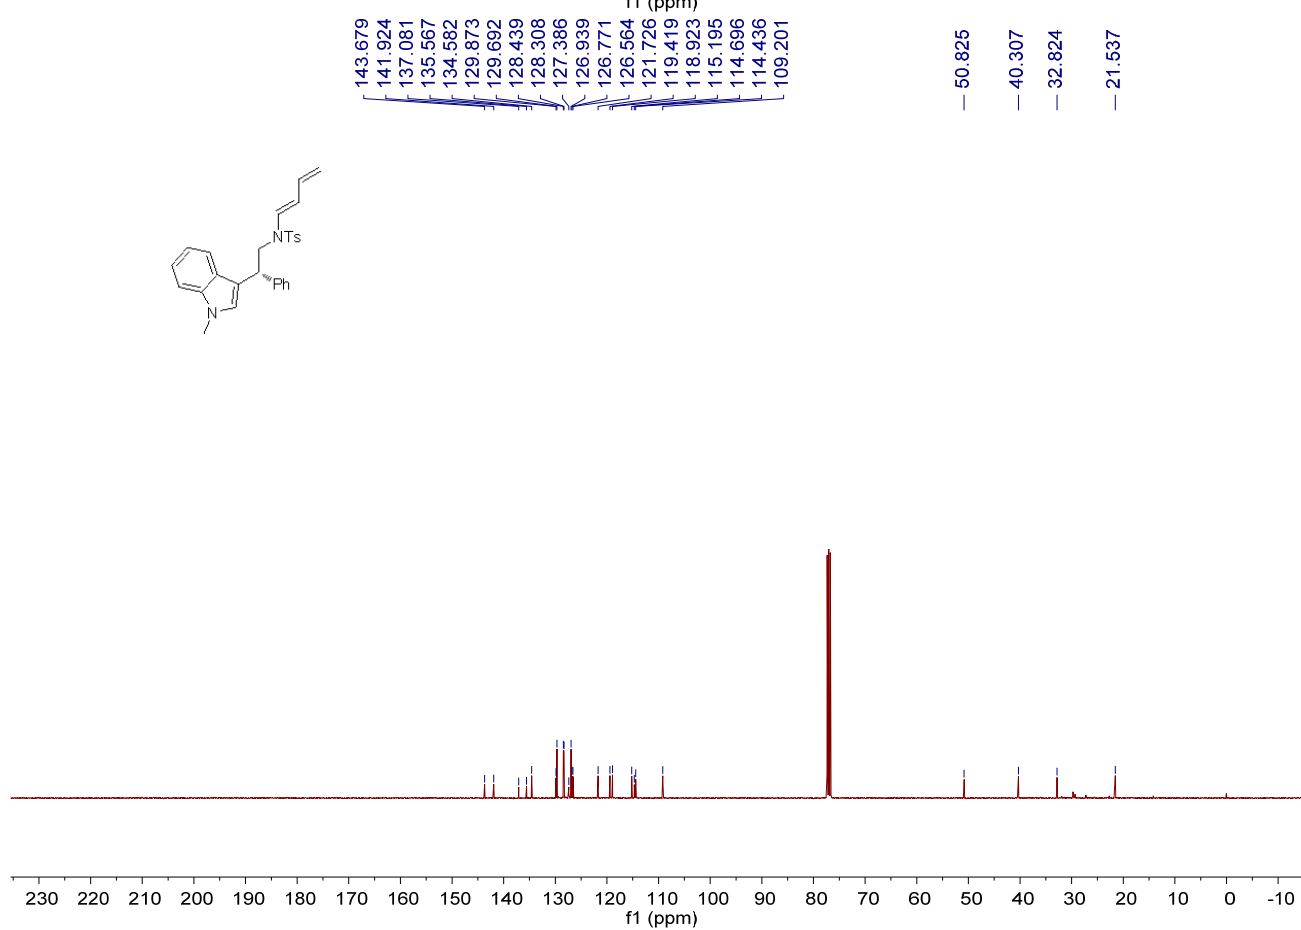

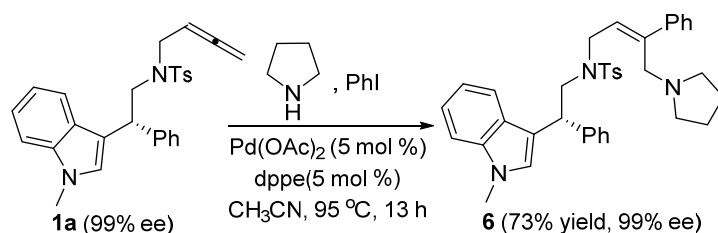

To an oven-dried reaction tube was sequentially added Pd(OAc)<sub>2</sub> (0.005 mmol), dppe (0.005 mmol), **1a** and acetonitrile (1.00 mL). Then, iodobenzene (0.125 mmol) and pyrrolidine (0.6 mmol) were added into tube under an argon atmosphere. The resulting mixture was stirred at 95 °C. When the reaction was complete as monitored by TLC, the solution was concentrated under reduced pressure and the crude residue was purified via a silica gel flash column chromatography (PE/EA = 10/1-5/1) to give the corresponding product **6**.

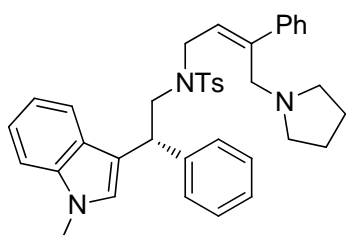

**(*R,Z*)-4-methyl-*N*-(2-(1-methyl-1*H*-indol-3-yl)-2-phenylethyl)-*N*-(3-phenyl-4-(pyrrolidin-1-yl)but-2-en-1-yl)benzenesulfonamide **6****

A white solid, 73% yield (44.1 mg). M.p.: 111-114 °C. <sup>1</sup>H NMR (CDCl<sub>3</sub>, TMS, 400 MHz) δ 1.64-1.68 (m, 4H), 2.37-2.40 (m, 7H), 3.27-3.35 (m, 2H), 3.59-3.65 (m, 1H), 3.72 (s, 3H), 3.88-4.13 (m, 3H), 4.66 (t, *J* = 8.0 Hz, 1H), 5.33 (t, *J* = 6.4 Hz, 1H), 6.96-7.02 (m, 2H), 7.09-7.12 (m, 2H), 7.18-7.32 (m, 12H), 7.41 (d, *J* = 8.0 Hz, 1H), 7.64 (d, *J* = 8.0 Hz, 2H). <sup>13</sup>C NMR (CDCl<sub>3</sub>, 100 MHz, TMS) δ 21.5, 23.4, 32.7, 42.2, 46.5, 52.4, 53.9, 109.2, 114.8, 118.9, 119.3, 121.6, 126.3, 126.6, 127.0, 127.1, 127.2, 127.3, 128.0, 128.3, 128.5, 129.6, 137.0, 137.1, 141.8, 142.2, 143.2. IR (CH<sub>2</sub>Cl<sub>2</sub>) ν 3394, 2922, 2851, 1646, 1454, 1327, 1155, 1090, 922, 814, 738, 699, 653 cm<sup>-1</sup>. MS (ESI) *m/z* (%): 604.29 (100) [M+H]<sup>+</sup>; HRMS (ESI) Calcd. For C<sub>38</sub>H<sub>42</sub>N<sub>3</sub>O<sub>2</sub>S<sup>+</sup> [M+H]<sup>+</sup> requires 604.2992, found: 604.2978. Enantiomeric excess was determined by HPLC with a Chiralcel ID3 column [λ = 254 nm; eluent: Hexane/Isopropanol = 95/5; Flow rate: 0.70 mL/min; *t*<sub>minor</sub> = 30.71 min, *t*<sub>major</sub> = 32.46 min; ee% = 99%; [α]<sub>D</sub><sup>25</sup> = -106.5 (c 0.10, CH<sub>2</sub>Cl<sub>2</sub>)].

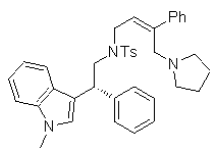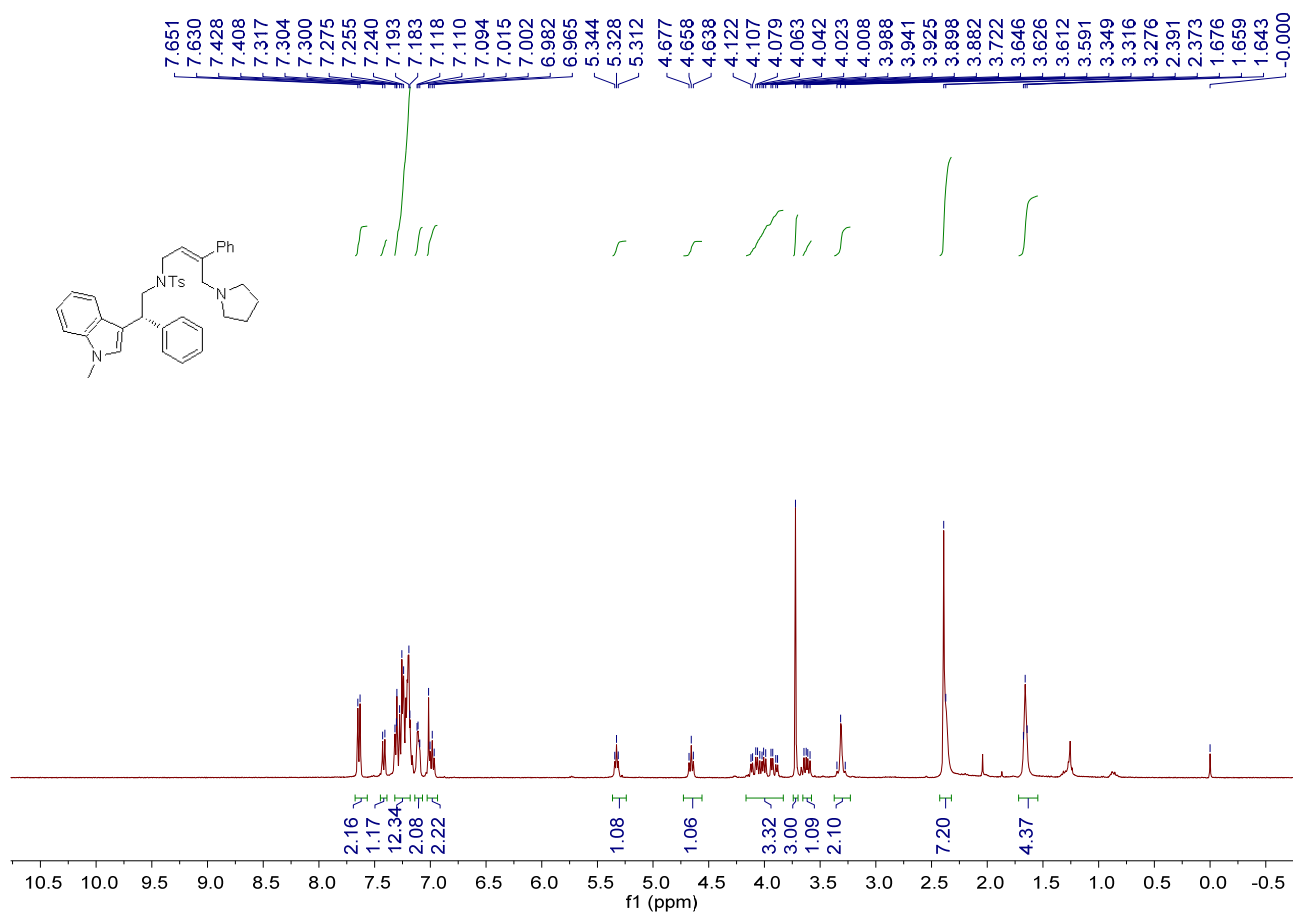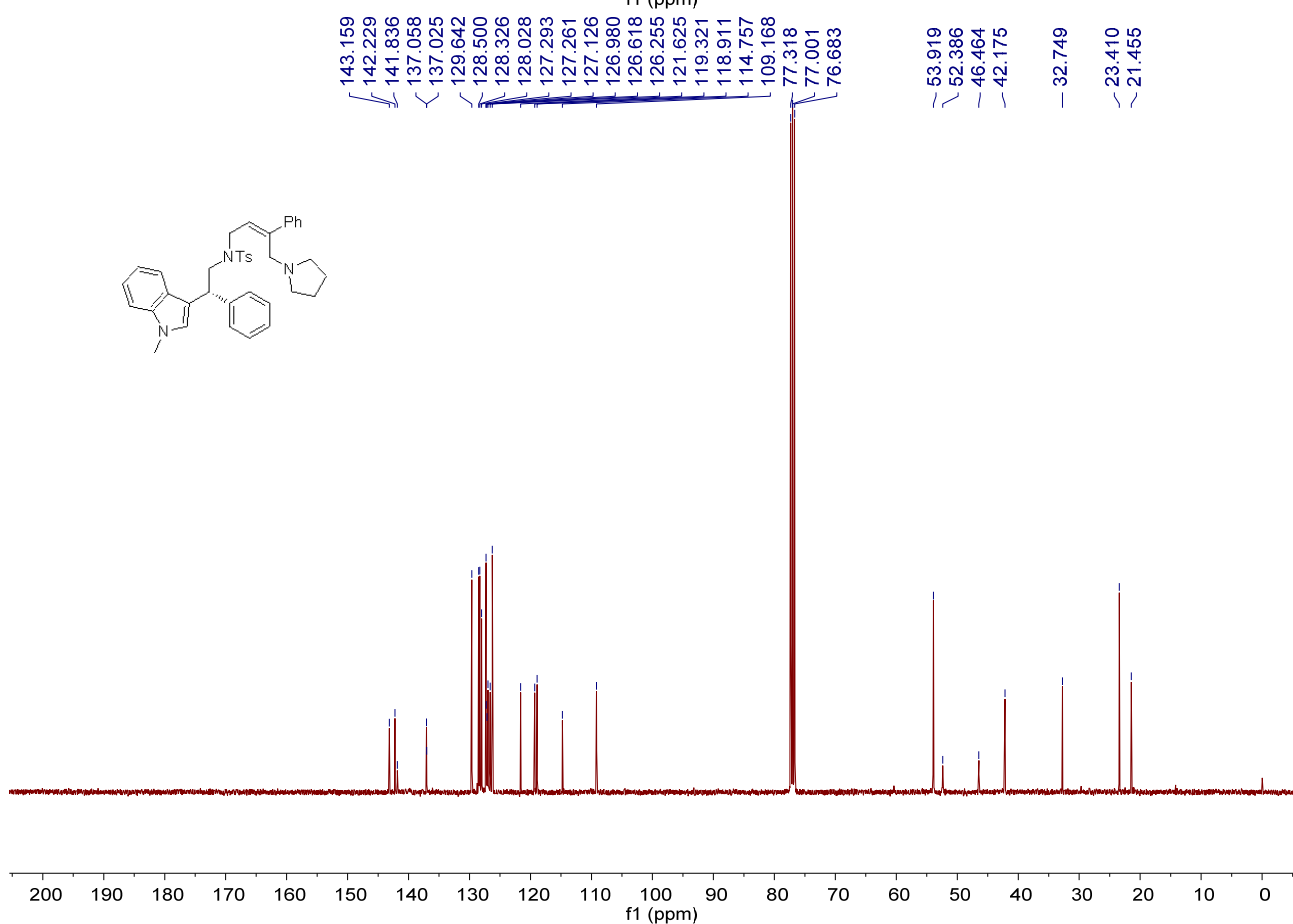

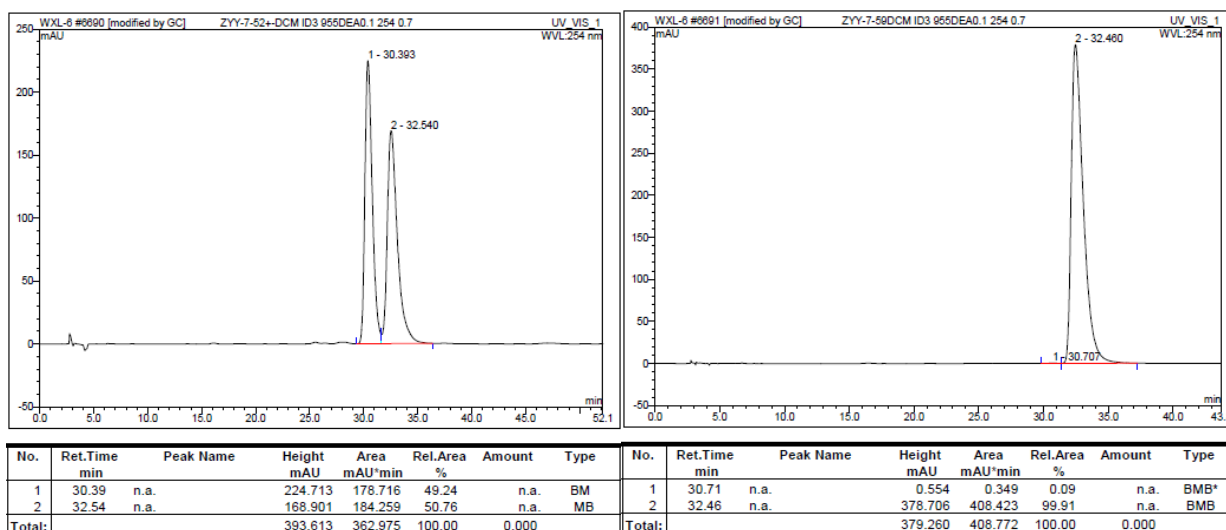

Translation: Chiralcel ID3 column [ $\lambda = 254$  nm; eluent: Hexane/Isopropanol = 95/5; Flow rate: 0.70 mL/min;  $t_{\text{minor}} = 30.71$  min,  $t_{\text{major}} = 32.46$  min; ee% = 99%].

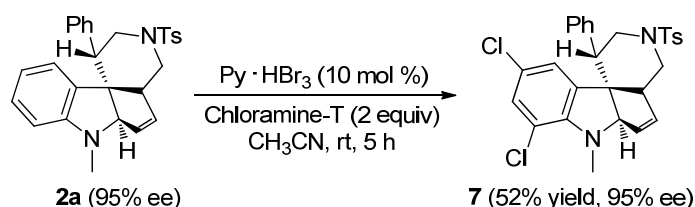

To an oven-dried reaction tube was sequentially added **2a** (0.10 mmol), Py·HBr<sub>3</sub> (0.01 mmol), and Chloramine-T (0.20 mmol) in acetonitrile (1.00 mL) under an argon atmosphere. The resulting mixture was stirred at room temperature. When the reaction was complete as monitored by TLC, water (5.00 mL) and ethyl acetate (5.00 mL) were added and then the aqueous solution was separated and extracted with ethyl acetate (3 × 5 mL). The organic layer was then washed with brine and dried over anhydrous Na<sub>2</sub>SO<sub>4</sub>. The solution was concentrated under reduced pressure and the crude residue was purified via a silica gel flash column chromatography (PE/EA = 10/1) to give the corresponding product **7**.

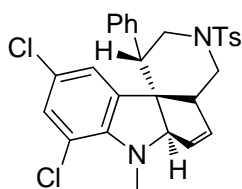

**(1*S*,4*aR*,6*aR*,11*bS*)-8,10-dichloro-7-methyl-1-phenyl-3-tosyl-2,3,4,4*a*,6*a*,7-hexahydro-1*H*-pyrido[4',3':2,3]cyclopenta[1,2-*b*]indole **7****

A white solid, 52% yield (27.1 mg). M.p.: 166-169 °C. <sup>1</sup>H NMR (CDCl<sub>3</sub>, TMS, 400 MHz)  $\delta$  2.36 (s,

3H), 2.42-2.47 (m, 4H), 3.05 (dd,  $J = 12.0, 12.0$  Hz, 1H), 3.12-3.21 (m, 2H), 3.69 (dd,  $J = 11.2, 4.4$  Hz, 1H), 3.94 (dd,  $J = 12.4, 6.0$  Hz, 1H), 4.48 (s, 1H), 5.68 (d,  $J = 6.0$  Hz, 1H), 5.82-5.88 (m, 2H), 6.72-6.75 (m, 2H), 6.88-6.95 (m, 2H), 7.02-7.11 (m, 3H), 7.35 (d,  $J = 8.0$  Hz, 2H), 7.69 (d,  $J = 8.0$  Hz, 2H).  $^{13}\text{C}$  NMR ( $\text{CDCl}_3$ , 100 MHz, TMS)  $\delta$  21.6, 36.1, 47.4, 47.8, 50.1, 50.7, 58.8, 75.6, 115.7, 122.1, 122.3, 127.50, 127.59, 127.6, 127.9, 129.7, 129.9, 130.6, 134.1, 134.2, 138.2, 140.5, 143.8, 144.7. IR ( $\text{CH}_2\text{Cl}_2$ )  $\nu$  2923, 1597, 1492, 1342, 1153, 1058, 935, 814, 730, 658  $\text{cm}^{-1}$ . MS (ESI)  $m/z$  (%): 525.11 (100)  $[\text{M}+\text{H}]^+$ ; HRMS (ESI) Calcd. For  $\text{C}_{28}\text{H}_{27}\text{N}_2\text{O}_2\text{Cl}_2\text{S}^+[\text{M}+\text{H}]^+$  requires 525.1165, found: 525.1165. Enantiomeric excess was determined by HPLC with a Chiralcel IC column [ $\lambda = 214$  nm; eluent: Hexane/Isopropanol = 70/30; Flow rate: 0.70 mL/min;  $t_{\text{minor}} = 23.42$  min,  $t_{\text{major}} = 20.54$  min; ee% = 95%;  $[\alpha]_{\text{D}}^{25} = -263.8$  (c 0.20,  $\text{CH}_2\text{Cl}_2$ )].

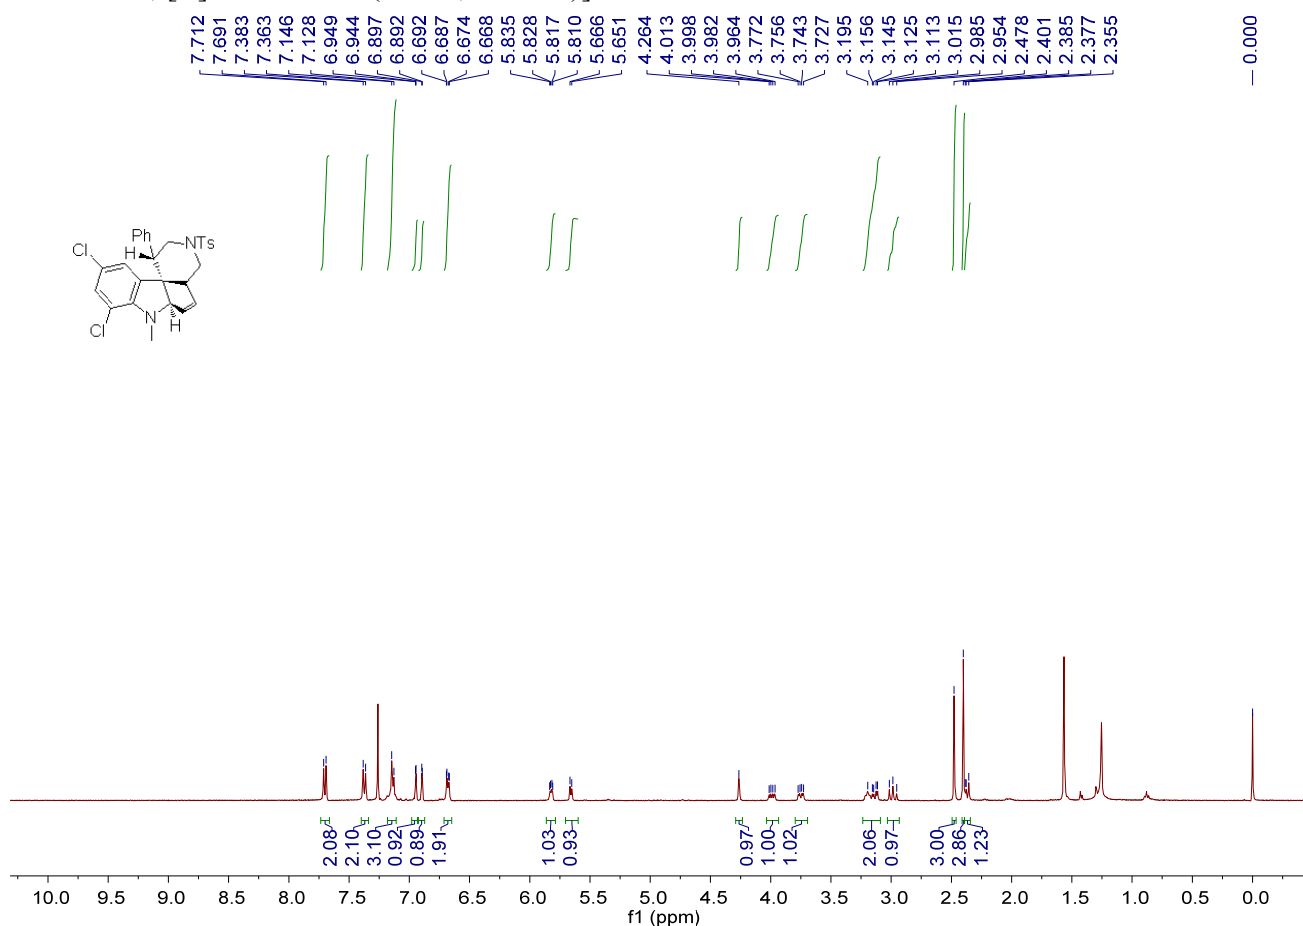

144.691  
143.824  
140.524  
138.241  
134.212  
134.076  
130.595  
129.903  
129.739  
127.943  
127.604  
127.588  
127.502  
122.345  
122.056  
115.696

77.318  
77.000  
76.683  
75.614

58.827  
50.744  
50.075  
47.781  
47.446

36.073

21.613

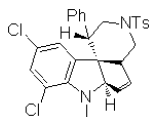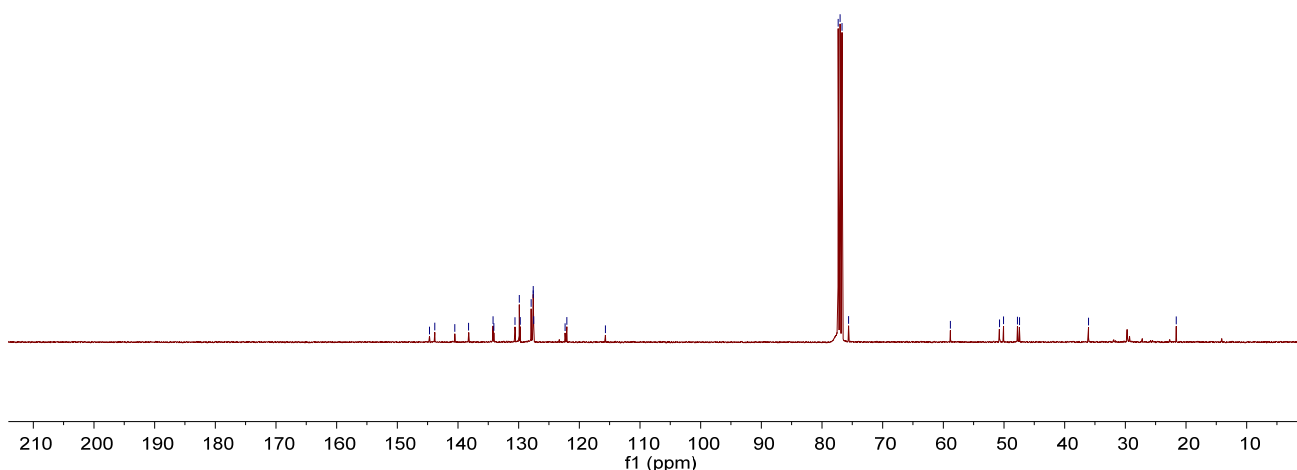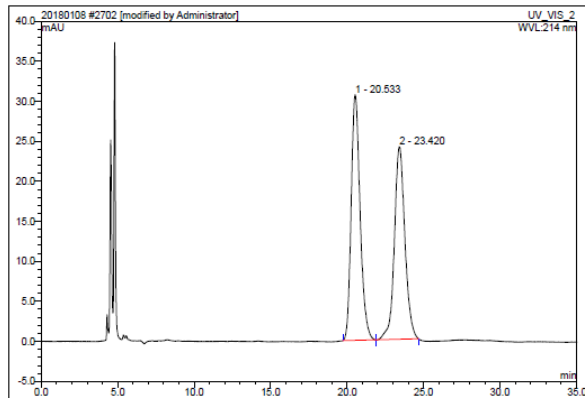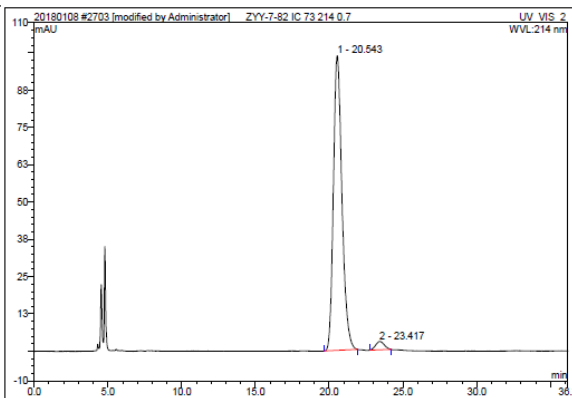

| No.    | Ret.Time min | Peak Name | Height mAU | Area mAU*min | Rel.Area % | Amount | Type |
|--------|--------------|-----------|------------|--------------|------------|--------|------|
| 1      | 20.53        | n.a.      | 30.680     | 20.753       | 51.95      | n.a.   | BM   |
| 2      | 23.42        | n.a.      | 24.051     | 19.193       | 48.05      | n.a.   | MB   |
| Total: |              |           | 54.731     | 39.946       | 100.00     | 0.000  |      |

| No.    | Ret.Time min | Peak Name | Height mAU | Area mAU*min | Rel.Area % | Amount | Type |
|--------|--------------|-----------|------------|--------------|------------|--------|------|
| 1      | 20.54        | n.a.      | 98.771     | 66.514       | 97.25      | n.a.   | BMB  |
| 2      | 23.42        | n.a.      | 2.777      | 1.880        | 2.75       | n.a.   | BMB  |
| Total: |              |           | 101.549    | 68.394       | 100.00     | 0.000  |      |

Translation: Chiralcel IC column [ $\lambda = 214$  nm; eluent: Hexane/Isopropanol = 70/30; Flow rate: 0.70 mL/min;  $t_{\text{minor}} = 23.42$  min,  $t_{\text{major}} = 20.54$  min; ee% = 95%]. (Note: In the 5 minute position, there is the peak of dichloromethane, due to that the sample was dissolved in dichloromethane for measuring).

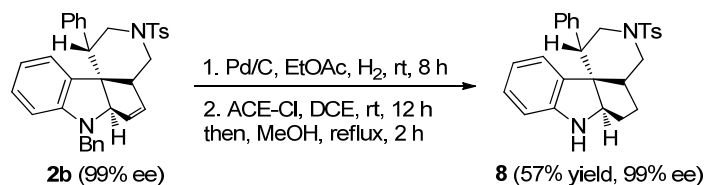

To an oven-dried reaction tube was sequentially added **2b** (0.10 mmol) and Pd/C (0.01 mmol) in ethyl acetate (2.00 mL). The resulting mixture was stirred at room temperature under H<sub>2</sub> atmosphere. When the reaction was complete as monitored by TLC, the Pd/C was removed, and then the solution was concentrated under reduced pressure to give the crude residue. Then, ACE-Cl (0.2 mmol) in DCE (1.0 mL) was added into crude residue. The resulting mixture was stirred at room temperature for 12 h. After that, DCE was removed under reduced pressure and MeOH (1.0 mL) was added into bottle. The bottle was stirred at reflux for 2 h. When the reaction was complete as monitored by TLC, the mixture was basified with saturated NaHCO<sub>3</sub> solution, and extracted with ethyl acetate (3 × 5 mL). The organic layer was dried over anhydrous Na<sub>2</sub>SO<sub>4</sub> and concentrated under reduced pressure to give the residue. Then, the crude residue was purified via a silica gel flash column chromatography (PE/EA = 6/1) to give the corresponding product **8**.

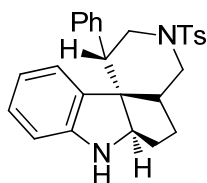

**(1*S*,4*aR*,6*aR*,11*bS*)-1-phenyl-3-tosyl-2,3,4,4*a*,5,6,6*a*,7-octahydro-1*H*-pyrido[4',3':2,3]cyclopenta[1,2-*b*]indole **8****

A white solid, 57% yield for two steps (25.3 mg). M.p.: 59-62 °C. <sup>1</sup>H NMR (CDCl<sub>3</sub>, TMS, 400 MHz) δ 1.35-1.47 (m, 2H), 1.56-1.67 (m, 1H), 1.95-2.07 (m, 1H), 2.18-2.25 (m, 1H), 2.49 (s, 3H), 2.67-2.80 (m, 2H), 3.27-3.32 (m, 1H), 3.86-3.94 (m, 3H), 6.24 (d, *J* = 7.6 Hz, 1H), 6.64-6.67 (m, 2H), 6.76-6.80 (m, 1H), 6.92-6.97 (m, 1H), 6.99-7.04 (m, 2H), 7.07-7.13 (m, 2H), 7.39 (d, *J* = 8.0 Hz, 2H), 7.72 (d, *J* = 8.0 Hz, 2H). <sup>13</sup>C NMR (CDCl<sub>3</sub>, 100 MHz, TMS) δ 21.6, 28.8, 35.6, 44.9, 47.3, 48.1, 48.7, 60.5, 61.7, 109.6, 119.0, 122.9, 126.7, 127.5, 127.68, 127.70, 128.1, 129.8, 133.7, 133.8, 138.7, 143.6, 151.2. IR (CH<sub>2</sub>Cl<sub>2</sub>) ν 3380, 3030, 2936, 2867, 1603, 1344, 1161, 1089, 934, 815, 700, 662 cm<sup>-1</sup>. MS (ESI) *m/z* (%): 445.19 (100) [M+H]<sup>+</sup>; HRMS (ESI) Calcd. For C<sub>27</sub>H<sub>29</sub>N<sub>2</sub>O<sub>2</sub>S<sup>+</sup>[M+H]<sup>+</sup> requires 445.1944, found: 445.1940. Enantiomeric excess was determined by HPLC with a Chiralcel IG column [λ = 214 nm;

eluent: Hexane/Isopropanol = 90/10; Flow rate: 0.70 mL/min;  $t_{\text{minor}} = 105.67$  min,  $t_{\text{major}} = 81.33$  min;  
 $ee\% = 99\%$ ;  $[\alpha]_D^{25} = -42.1$  (c 0.20,  $\text{CH}_2\text{Cl}_2$ ).

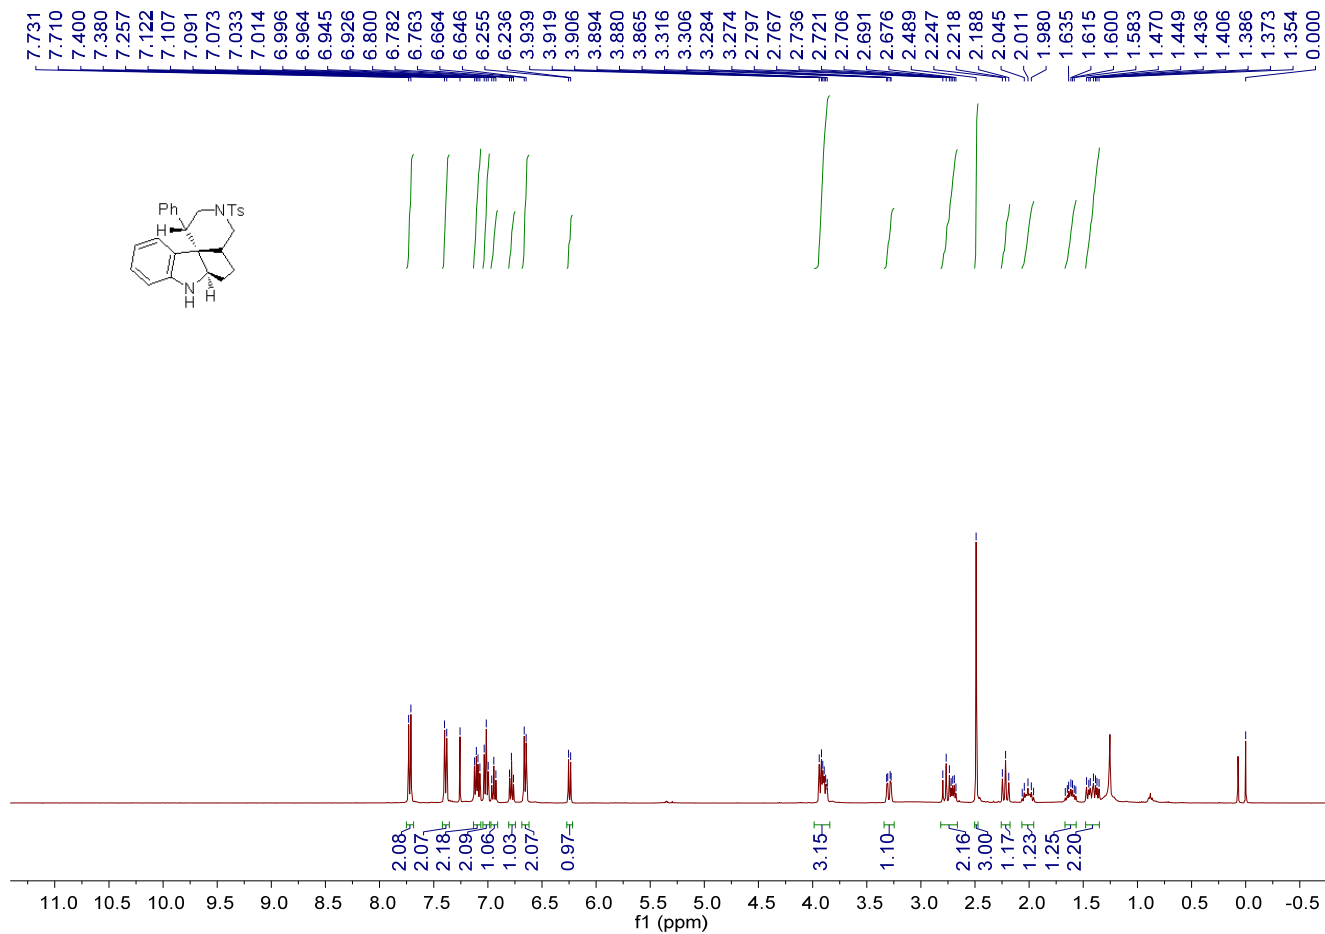



151.191  
143.647  
138.686  
133.755  
133.662  
129.841  
128.128  
127.697  
127.677  
127.454  
126.683  
122.938  
118.964  
109.560

77.317  
77.000  
76.682  
61.710  
60.450  
48.735  
48.135  
47.284  
44.923  
35.602  
28.789  
21.607

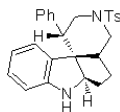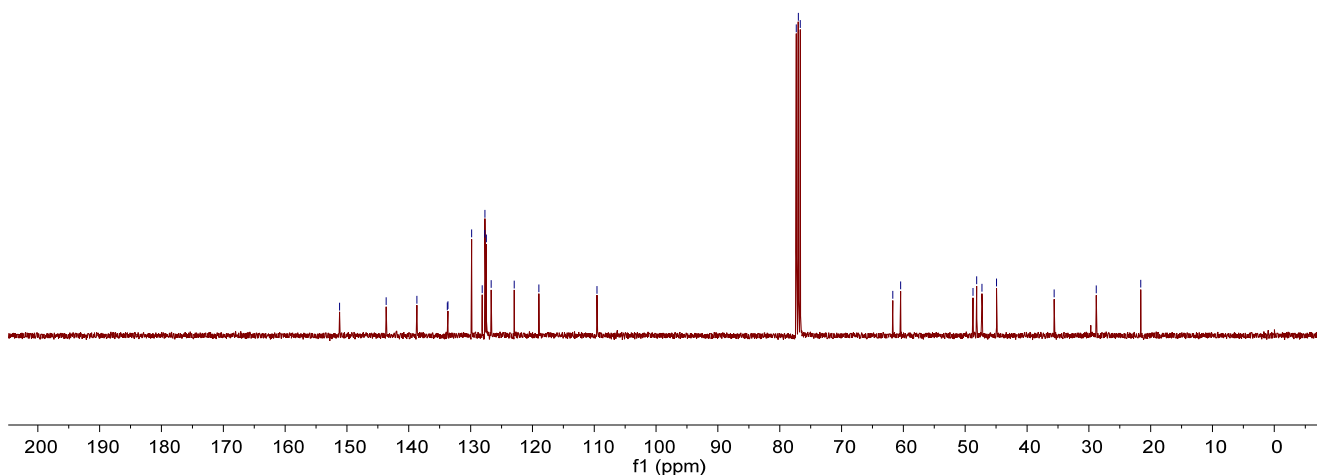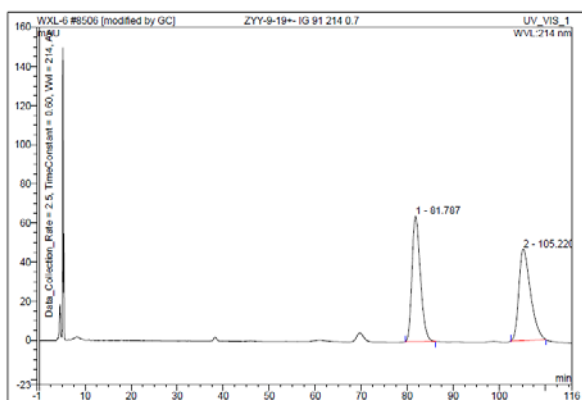

| No.           | Ret.Time min | Peak Name | Height mAU | Area mAU*min | Rel.Area % | Amount | Type |
|---------------|--------------|-----------|------------|--------------|------------|--------|------|
| 1             | 81.79        | n.a.      | 64.265     | 135.815      | 49.93      | n.a.   | BMB* |
| 2             | 105.22       | n.a.      | 46.722     | 136.220      | 50.07      | n.a.   | BMB* |
| <b>Total:</b> |              |           | 110.986    | 272.035      | 100.00     | 0.000  |      |

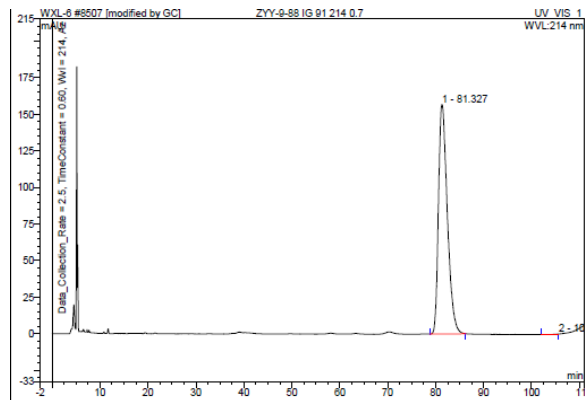

| No.           | Ret.Time min | Peak Name | Height mAU | Area mAU*min | Rel.Area % | Amount | Type |
|---------------|--------------|-----------|------------|--------------|------------|--------|------|
| 1             | 81.33        | n.a.      | 156.976    | 336.612      | 99.96      | n.a.   | BMB  |
| 2             | 105.67       | n.a.      | 0.227      | 0.119        | 0.04       | n.a.   | BM * |
| <b>Total:</b> |              |           | 157.202    | 336.730      | 100.00     | 0.000  |      |

Translation: Chiralcel IG column [ $\lambda = 214$  nm; eluent: Hexane/Isopropanol = 90/10; Flow rate: 0.70 mL/min;  $t_{\text{minor}} = 105.67$  min,  $t_{\text{major}} = 81.33$  min; ee% = 99%]. (Note: In the 5 minute position, there is the peak of dichloromethane, due to that the sample was dissolved in dichloromethane for measuring).

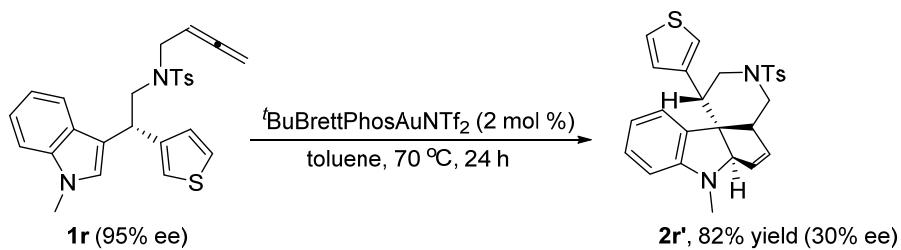

To a flame dried Schlenk tube was added chiral compound **1r** (0.1 mmol),  $t\text{BuBrettPhosAuNTf}_2$  (2.0 mol %) and the tube was evacuated and backfilled with argon for three times. Then, anhydrous toluene (1.0 mL) was added into tube under argon atmosphere. The reaction mixture was allowed to stir at 70 °C. The solvent was removed under reduced pressure, and the residue was purified by a flash column chromatography on silica gel to give the desired product **2r'**.

## 10. X-ray crystallographic information of products **2f**, **6**, **7** and **2r'**.

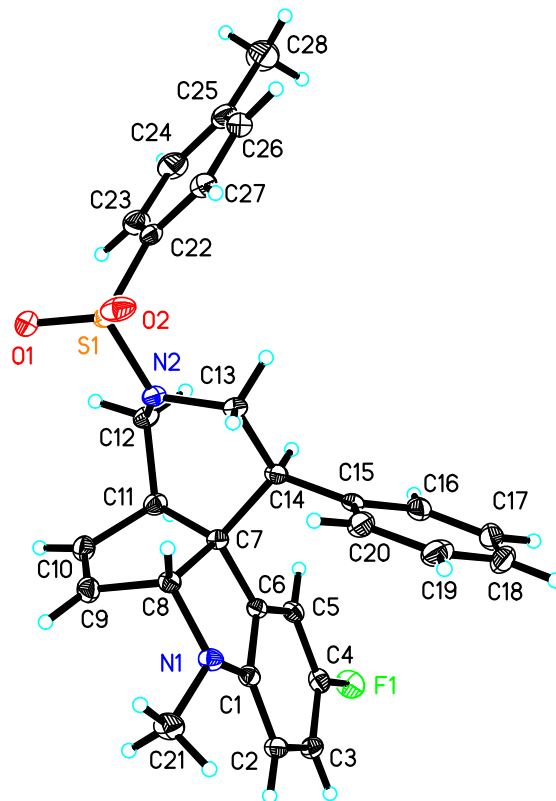

The crystal data of **2f** have been deposited in CCDC with number 1816191. Empirical Formula:  $C_{28}H_{27}FN_2O_2S$ ; Formula Weight: 474.57; Crystal Color, colorless; Crystal Dimensions: 0.180 x 0.140 x 0.100 mm<sup>3</sup>; Crystal System: Monoclinic; Lattice Parameters:  $a = 9.8347(3)\text{\AA}$ ,  $b = 10.2954(3)\text{\AA}$ ,  $c = 12.0508(4)\text{\AA}$ ,  $\alpha = 90^\circ$ ,  $\beta = 105.0320(10)^\circ$ ,  $\gamma = 90^\circ$ ,  $V = 1178.42(6)\text{\AA}^3$ ; Space group: P 21;  $Z = 2$ ;  $D_{calc} = 1.337\text{ g/cm}^3$ ;  $F_{000} = 500$ ; Final R indices [ $I > 2\sigma(I)$ ]  $R1 = 0.0321$ ,  $wR2 = 0.0830$ .



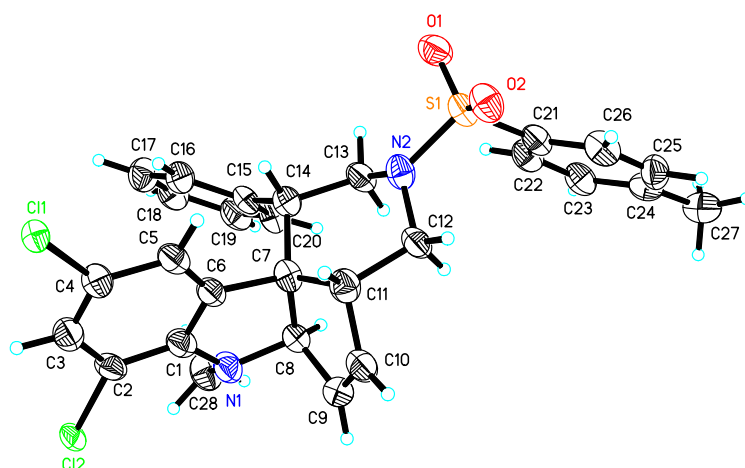

The crystal data of **7** have been deposited in CCDC with number 1846480. Empirical Formula:  $C_{28}H_{26}Cl_2N_2O_2S$ ; Formula Weight: 525.47; Crystal Color, colorless; Crystal Dimensions: 0.160 x 0.130 x 0.080 mm<sup>3</sup>; Crystal System: Monoclinic; Lattice Parameters:  $a = 8.5142(5)\text{\AA}$ ,  $b = 11.8312(8)\text{\AA}$ ,  $c = 13.0004(8)\text{\AA}$ ,  $\alpha = 90^\circ$ ,  $\beta = 106.969(3)^\circ$ ,  $\gamma = 90^\circ$ ,  $V = 1252.56(14)\text{\AA}^3$ ; Space group: P 21;  $Z = 2$ ;  $D_{calc} = 1.393\text{ g/cm}^3$ ;  $F_{000} = 548$ ; Final R indices [ $I > 2\sigma(I)$ ]  $R1 = 0.0862$ ,  $wR2 = 0.2346$ .

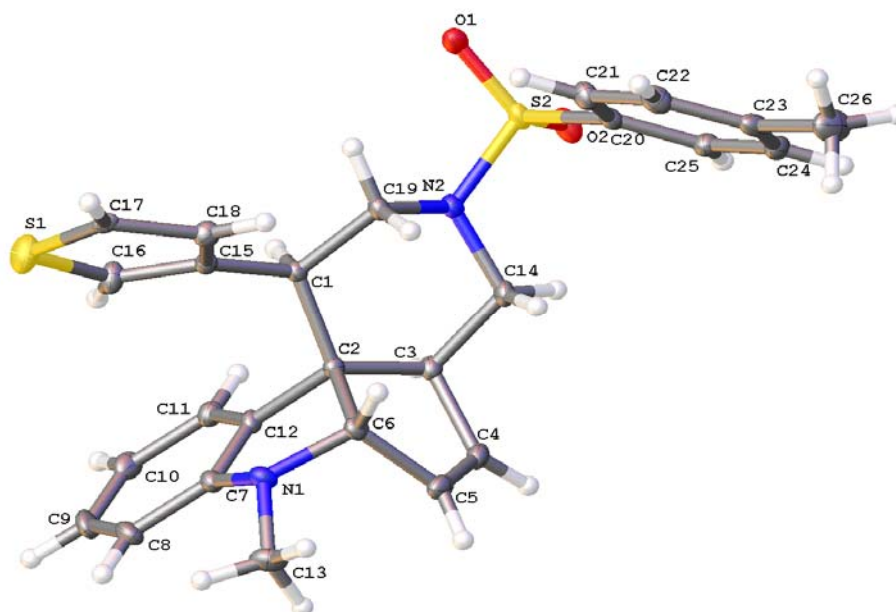

The crystal data of **2r'** have been deposited in CCDC with number 1838571. Empirical Formula:  $C_{26}H_{26}N_2O_2S_2$ ; Formula Weight: 462.61; Crystal Color, colorless; Crystal Dimensions: 0.1 x 0.08 x 0.05 mm<sup>3</sup>; Crystal System: Triclinic; Lattice Parameters:  $a = 6.42400(10)\text{\AA}$ ,  $b = 8.1480(2)\text{\AA}$ ,  $c = 11.8965(3)\text{\AA}$ ,  $\alpha = 108.3570(10)^\circ$ ,  $\beta = 103.5550(10)^\circ$ ,  $\gamma = 93.6680(10)^\circ$ ,  $V = 568.10(2)\text{\AA}^3$ ; Space group: P1;  $Z = 1$ ;  $D_{calc} = 1.352\text{ g/cm}^3$ ;  $F_{000} = 244$ ; Final R indices [ $I > 2\sigma(I)$ ]  $R1 = 0.0369$ ,  $wR2 = 0.1009$ .

## 11. References

- [1] Rajasekar, S.; Yadagiri, D.; Anbarasan, P. *Chem. - Eur. J.* **2015**, *21*, 17079.
- [2] Lin, T.-Y.; Wu, H.-H.; Feng, J.-J.; Zhang, J.-L. *ACS Catal.* **2017**, *7*, 4047.
